# Supplementary material for: Diagnostic reliability in teledermatology: a systematic review and a meta-analysis
Source: PubMed Central journal article supplement — BMJ Open. 2023 Aug 11;13(8):e068207. doi: 10.1136/bmjopen-2022-068207 (PMC10423833; doi:10.1136/bmjopen-2022-068207), 2023-08-11
Supplement: bmjopen-2022-068207.draft_revisions.pdf [file bmjopen-2022-068207.draft_revisions.pdf]

# BMJ Open

BMJ Open is committed to open peer review. As part of this commitment we make the peer review history of every article we publish publicly available.

When an article is published we post the peer reviewers' comments and the authors' responses online. We also post the versions of the paper that were used during peer review. These are the versions that the peer review comments apply to.

The versions of the paper that follow are the versions that were submitted during the peer review process. They are not the versions of record or the final published versions. They should not be cited or distributed as the published version of this manuscript.

BMJ Open is an open access journal and the full, final, typeset and author-corrected version of record of the manuscript is available on our site with no access controls, subscription charges or pay-per-view fees (<http://bmjopen.bmj.com>).

If you have any questions on BMJ Open's open peer review process please email [info.bmjopen@bmj.com](mailto:info.bmjopen@bmj.com)

# BMJ Open

## Diagnostic Reliability in Teledermatology: A Systematic Review and a Meta-Analysis

|                               |                                                                                                                                                                                                                                                                                                                                                                                                                                                                       |
|-------------------------------|-----------------------------------------------------------------------------------------------------------------------------------------------------------------------------------------------------------------------------------------------------------------------------------------------------------------------------------------------------------------------------------------------------------------------------------------------------------------------|
| Journal:                      | <i>BMJ Open</i>                                                                                                                                                                                                                                                                                                                                                                                                                                                       |
| Manuscript ID                 | bmjopen-2022-068207                                                                                                                                                                                                                                                                                                                                                                                                                                                   |
| Article Type:                 | Original research                                                                                                                                                                                                                                                                                                                                                                                                                                                     |
| Date Submitted by the Author: | 09-Sep-2022                                                                                                                                                                                                                                                                                                                                                                                                                                                           |
| Complete List of Authors:     | Bourkas, Adrienn; Queen's University School of Medicine<br>Barone, Natasha; McGill University<br>Bourkas, Matthew; University of Toronto, Department of Biochemistry<br>Mannarino, Matthew; McGill University, Department of Surgery<br>Fraser, Robert; Western University Arthur Labatt Family School of Nursing, Nursing<br>Lorincz, Amy; Swift Medical Inc<br>Wang, Sheila; McGill University<br>Ramirez-GarciaLuna, Jose; McGill University, Experimental Surgery |
| Keywords:                     | Telemedicine < BIOTECHNOLOGY & BIOINFORMATICS, DERMATOLOGY, PRIMARY CARE, Information technology < BIOTECHNOLOGY & BIOINFORMATICS, STATISTICS & RESEARCH METHODS                                                                                                                                                                                                                                                                                                      |
|                               |                                                                                                                                                                                                                                                                                                                                                                                                                                                                       |

SCHOLARONE™  
Manuscripts

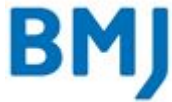

I, the Submitting Author has the right to grant and does grant on behalf of all authors of the Work (as defined in the below author licence), an exclusive licence and/or a non-exclusive licence for contributions from authors who are: i) UK Crown employees; ii) where BMJ has agreed a CC-BY licence shall apply, and/or iii) in accordance with the terms applicable for US Federal Government officers or employees acting as part of their official duties; on a worldwide, perpetual, irrevocable, royalty-free basis to BMJ Publishing Group Ltd ("BMJ") its licensees and where the relevant Journal is co-owned by BMJ to the co-owners of the Journal, to publish the Work in this journal and any other BMJ products and to exploit all rights, as set out in our [licence](#).

The Submitting Author accepts and understands that any supply made under these terms is made by BMJ to the Submitting Author unless you are acting as an employee on behalf of your employer or a postgraduate student of an affiliated institution which is paying any applicable article publishing charge ("APC") for Open Access articles. Where the Submitting Author wishes to make the Work available on an Open Access basis (and intends to pay the relevant APC), the terms of reuse of such Open Access shall be governed by a Creative Commons licence – details of these licences and which [Creative Commons](#) licence will apply to this Work are set out in our licence referred to above.

Other than as permitted in any relevant BMJ Author's Self Archiving Policies, I confirm this Work has not been accepted for publication elsewhere, is not being considered for publication elsewhere and does not duplicate material already published. I confirm all authors consent to publication of this Work and authorise the granting of this licence.

**Title:** Diagnostic Reliability in Teledermatology: A Systematic Review and a Meta-Analysis

**Authors**

Adrienn N. Bourkas\*<sup>1</sup> (MSc), Natasha Barone\*<sup>2</sup> (MSc), Matthew E.C. Bourkas<sup>3</sup> (PhD), Matthew Mannarino<sup>5</sup> (PhD), Robert D. J. Fraser<sup>4,6</sup> (RN, MN), Amy Lorincz<sup>4</sup> (MSc), Sheila C. Wang<sup>4,7</sup> (MD, PhD), Jose L. Ramirez-GarciaLuna<sup>4,5</sup> (MD, PhD)

\* Authors contributed equally

**Affiliations**

<sup>1</sup>Faculty of Health Sciences, Queen's University School of Medicine, Kingston, Ontario, Canada

<sup>2</sup>Faculty of Medicine and Health Sciences, McGill University, Montreal, Quebec, Canada

<sup>3</sup>Temerty Faculty of Medicine, Department of Biochemistry, University of Toronto, Toronto, Ontario, Canada

<sup>4</sup>Swift Medical Inc., Toronto, Ontario, Canada

<sup>5</sup>Department of Surgery, McGill University, Montreal, Canada

<sup>6</sup>Arthur Labatt Family School of Nursing, Western University, London, Ontario Canada

<sup>7</sup>Department of Medicine, Division of Dermatology, McGill University Health Centre, Montreal, Quebec, Canada

**Corresponding author**

Jose L. Ramirez-GarciaLuna, MD, PhD

Research Institute-McGill University Health Centre

Montreal General Hospital 1650 Cedar Ave, Montreal, Quebec, Canada H3G 1A4

Tel: 514-934-1934 ext 44522

Email: [jose.ramirezgarcialuna@mail.mcgill.ca](mailto:jose.ramirezgarcialuna@mail.mcgill.ca)



## Abstract

**Objectives:** To compare TD and F2F agreement in primary diagnoses of dermatological conditions.

**Design:** Systematic review and Meta-Analysis

**Methods:** MEDLINE, Embase, Cochrane Library (Wiley), CINAHL, and medRxiv were searched between January 2010 and May 2022. Observational studies and randomized clinical trials that reported percentage agreement or kappa concordance for primary diagnoses between TD and F2F physicians were included. Titles, abstracts, and full-text articles were screened in duplicate. From 6,945 citations, 44 articles were included. A random-effects meta-analysis was conducted to estimate pooled estimates. The QUADAS-2 tool and the Cochrane RoB2 tool were used to evaluate the risk of bias. Primary outcome measures were mean percentage and kappa concordance for assessing diagnostic matches between TDs and F2F. Secondary outcome measures included agreement between TDs, F2F dermatologists, and TD and histopathology results.

**Results:** 44 studies were extracted and reviewed. The pooled agreement rate was 68.9%, and kappa concordance was 0.67. When both F2F and TD consults were conducted by dermatologists, the overall diagnostic agreement was significantly higher at 71%, compared to 44% for non-specialists. Kappa concordance was 0.69 for TD vs specialist, and 0.52 for non-specialists. Higher diagnostic agreements were also noted with image acquisition training, and the use of digital photography. Agreement rate was 76.4% between TDs, 82.4% between F2F physicians, and 55.7% between TD and histopathology.

1  
2  
3 Conclusions and Relevance: TD can be an attractive option particularly in resource poor settings.

4  
5 Future efforts should be placed on incorporating image acquisition training and access to high  
6  
7  
8 quality imaging technologies.

9  
10 Registration number: 10.17605/OSF.IO/FJDVG

11  
12  
13  
14 **Keywords:** teledermatology, dermatology consultations, store-and-forward, telemedicine,  
15  
16 remote consultation, dermatology hospitalists

17  
18  
19  
20  
21 **Article Summary:**

22 Strengths and limitations of this study:

- 23  
24  
25  
26
  - 27 • This is the most comprehensive systematic review and meta-analysis of the topic to date
  - 28 without language restrictions applied.
  - 29
  - 30
  - 31 • Inclusion criteria was broad, permitting the inclusion of all types of dermatological
  - 32 diseases, imaging technologies, in person physician specializations (GPs, hospitalists, and
  - 33 dermatologists), and presence or absence of image acquisition training.
  - 34
  - 35
  - 36 • Article search was limited to 2010 and later due to the recent incorporation of
  - 37 smartphones in teledermatology practices.
  - 38
  - 39
  - 40
  - 41 • Due to considerable heterogeneity between studies, meta-analysis and synthesis of
  - 42 predictors for accurate diagnoses remotely was limited even after subgrouping.
  - 43
  - 44
  - 45
  - 46
  - 47
  - 48
  - 49
  - 50
  - 51
  - 52
  - 53
  - 54
  - 55
  - 56
  - 57
  - 58
  - 59
  - 60

## Introduction

With the emergence of COVID-19, the introduction of virtual consults in healthcare settings, especially dermatology, has been expanded to allow many patients the opportunity for equitable access to care when in-person appointments pose a challenge and risk to patients.<sup>1</sup> Different modalities were introduced to support Teledermatology (TD). This involves the remote sharing of patient data, which includes synchronous video-streaming TD, and asynchronous sharing of still images- via emails, or text messages, or store-and-forward TD (SFTD).

Although both synchronous and asynchronous approaches have been shown to be cost effective, SFTD is particularly popular as it requires fewer resources and less coordination than synchronous TD.<sup>2, 3</sup> With the advent of higher resolution smartphone cameras, relatively minimal training is required to correctly capture data for remote dermatologists; multiple SFTD studies opted to provide no training in image capture and still found value in TD.<sup>4, 5</sup>

There is valid concern over the reliability of TD given the significant variability in diagnostic accuracy predicted across pre-pandemic research.<sup>6</sup> This is expected given the lack of standardization across studies and the potential for confounds across TD methodologies and applications, e.g., level of training or skin lesion type. This variability in approach may benefit from an increased demand, which could provide greater impetus to optimize and standardize TD.

To our knowledge, this is the first and most inclusive meta-analysis (MA) that compares dermatology TD consults to face-to-face (F2F) that looked at all relevant studies without overly exclusive inclusion criteria. The primary objective of this study was to compare the reliability of

1  
2  
3 TD diagnoses to F2F consults, as determined by Cohen's kappa interrater agreement and total  
4 agreement rates. TD can assume important roles as a routine complement to primary care and an  
5 alternate route to the typical in-person referrals. Consequently, we wanted to determine agreement  
6 for TD and all F2F consults, TD and F2F primary care consults, and finally TD and F2F  
7 dermatologist consults, which would arguably best capture the limitations introduced by the  
8 change in medium from F2F to TD.  
9

10  
11  
12 Additional subset analyses were performed to control for potential confounds (e.g., inflammatory  
13 vs. malignant, staff training for image acquisition, teledermoscopy, and smartphone vs digital  
14 cameras) introduced by the heterogenous methodology. The secondary objectives sought to  
15 determine the agreement rate within TD diagnoses and within F2F consults to provide an idea of  
16 each medium's consistency, and for the agreement rate between TD and histopathology, provides  
17 the best estimate of accuracy.  
18  
19  
20  
21  
22  
23  
24  
25  
26  
27  
28  
29  
30  
31  
32  
33  
34  
35  
36  
37  
38  
39  
40  
41  
42  
43  
44  
45  
46  
47  
48  
49  
50  
51  
52  
53  
54  
55  
56  
57  
58  
59  
60

## Methods

### Protocol Registration

This study was performed in accordance with the Preferred Reporting Items for Systematic review and Meta-Analysis Protocols (PRISMA-P) 2015 guidelines.<sup>7</sup> The protocol for this review was registered on Open Science Framework (<https://osf.io/fjdvg>).

### Search Strategy

A comprehensive search of major bibliographic databases, MEDLINE, Embase, Cochrane Library (Wiley), CINAHL, and medRxiv was performed in August 2021, and MEDLINE was searched again between August 2021 and May 2022 to screen any new articles published after our protocol was registered. The search strategy was developed by a medical librarian at Queen's University (Kingston, ON).

No restrictions were placed on language or status of the publications. Search results were limited to studies published between January 2010 and May 2022 due to the novelty of incorporating smartphones in teledermatology remote consultations.<sup>8</sup> The International Prospective Register of Systematic Reviews (PROSPERO) and OSF were searched up to May 2022 for relevant ongoing systematic reviews using the terms 'telemedicine', 'teledermatology', 'dermatology', 'diagnostic accuracy', and 'diagnostic concordance'. Reference lists of included studies were screened to identify additional studies not identified in the search.

### Eligibility Criteria

Studies evaluating the diagnostic reliability of TD that reported on patients with dermatological conditions who were evaluated by a clinician using SFTD (asynchronous) or live video-based (synchronous) telemedicine systems were included. It was required that all articles compared the tele- to a F2F diagnosis conducted by a physician. Inclusion and exclusion criteria are summarized in **eTable 1**, available in the supplementary appendix.

### Data Selection & Extraction

Following the removal of duplicated citations, the titles and abstracts were screened. Following this step, a full text assessment was conducted. At both stages, screening was performed independently by two reviewers [AB and NB]. Any disagreements were resolved through consensus by two reviewers and when necessary, through discussion with a third reviewer [JLRG].

A data collection form was created on the *Covidence* website and piloted by two reviewers [AB, NB]. Three additional reviewers assisted with data extraction [JLRG, MB, MM]. Two reviewers were assigned to each paper. One reviewer extracted all characteristics of the included literature, and the second reviewer validated the characteristics for accuracy. Any disagreements were resolved by consensus. In the supplementary appendix, **eTable 2** summarizes the information extracted from full-text articles.

### Data Synthesis

This MA assessed the effectiveness of SFTD technologies and live video conferencing in diagnosing skin conditions. Outcomes regarding complete diagnostic percentage agreement rates

1  
2  
3 and Cohen's kappa concordance were assessed separately, with some studies being part of both  
4 analyses if they reported both variables. The patient, intervention type, lesion, and geographic  
5 characteristics were summarized qualitatively. Please see supplementary appendix and **eTable 3**  
6  
7  
8 for more details on data synthesis and nomenclature for each study grouping.  
9  
10  
11  
12  
13

### 14 Risk of Bias

15  
16 Three reviewers [AB, NB, MB] completed the risk of bias assessment; all studies were  
17 independently reviewed. Version 2 of the Cochrane risk-of-bias tool for randomized trials (RoB  
18 2) was used to assess the risk of bias in three randomized trials.<sup>9-11</sup> RoB 2 is structured into a fixed  
19 set of domains of bias, focusing on different aspects of trial design, conduct, and reporting.<sup>12</sup> The  
20 Quality Assessment of Diagnostic Assessment of Diagnostic Accuracy (2<sup>nd</sup> Edition, QUADAS-2)  
21 was used to assess risk of bias. Uncertain risk of bias was assigned to studies with insufficient  
22 information except for studies that were likely to be biased due to missing data. In the latter case,  
23 high risk of bias was assigned.  
24  
25  
26  
27  
28  
29  
30  
31  
32  
33  
34  
35  
36  
37

### 38 Search Strategy, and Data Analysis

39  
40 Please see supplementary appendix for additional information on search strategy and interpretation  
41 of kappa values.  
42  
43  
44  
45  
46

### 47 Patient and Public Involvement

48  
49 Patients or the public were not involved in the design, or conduct, or reporting, or dissemination  
50 plans of our research.  
51  
52  
53  
54  
55  
56  
57  
58  
59  
60

## Results

6,945 studies were screened for eligibility of which 44 were included in this study. Of these, 40 studies reported diagnostic agreement rates<sup>4, 5, 9-11, 13-47</sup> and 21 studies reported kappa concordance.<sup>5, 9, 13, 14, 19, 22, 25, 28-33, 35-37, 48-52</sup> Further details are provided in the PRISMA diagram in **Figure 1**. Full list of excluded studies can be found in the supplementary appendix, **eTable 4**.

### Study and patient characteristics

**Table 1** summarizes study characteristics for the 44 papers that were included. Forty-one (93%) of the included studies were observational, of which 31 (76%) were prospective, nine (22%) were retrospective. One (2%) study was ambispective. Three studies were randomized controlled trials and one study was a quasi-randomized trial. Thirteen studies (30%) were from the United States of America (USA), where one study looked at patients living in Botswana who were evaluated by TDs based in the USA. Thirteen (30%) from Europe, eleven (25%) from South America, and seven (16%) from other countries. There were ten primary studies published after January 2020 where a pre and post pandemic analysis was performed.

**Table 2** summarizes participant characteristics. Studies selected for the review included a total of 52,075 patients (Range: 26 to 24,210 patients). Some patients had multiple lesions and the total number of lesions included in the study was 57,222 (Range: 26 to 27,519 lesions). Thirty-seven (83%) of papers examined less than 500 skin lesions.

The mean age reported in 27 (61%) studies was  $54.78 \pm 15.69$  years (Range: 0 to 100 years old). Thirty-four (77%) studies reported participant gender, with a mean of 57% females (Range: 3.2%



1  
2  
3 to 74%). Only 13 (29%) of studies reported information on Fitzpatrick skin types, ethnicity, or  
4  
5 race. The dermatoses included in this study were grouped as “all types of skin lesions”, “skin  
6  
7 cancers only”, and inflammatory or benign skin conditions. Twenty-seven studies (62%) included  
8  
9 in this analysis were inclusive to all types of dermatoses, 13 (29%) studies looked specifically at  
10  
11 suspicious lesions, and three (6.8%) studies excluded skin cancers completely. Results on the  
12  
13 diagnostic reliability between TDs and F2F (specialist and non-specialists combined) and  
14  
15 diagnostic agreement between TDs, F2F dermatologists, and TD vs Histopathology are included  
16  
17 in the supplementary appendix.  
18  
19  
20  
21  
22  
23

#### 24 Diagnostic reliability of TD when compared to F2F (specialist and non-specialists) evaluation

25  
26 Agreement was assessed by measuring the complete agreement of primary diagnoses between TD  
27  
28 and F2F physicians (both specialist and non-specialists) by analyzing diagnostic agreement rates  
29  
30 (percentage) and concordance (Cohen’s kappa coefficient). The overall diagnostic agreement rate  
31  
32 and concordance were 68.9% (CI 64.4% to 73.1%), and 0.67 (CI 0.60 to 0.74). See **eFigure 1** and  
33  
34 the supplementary appendix for further details.  
35  
36  
37  
38  
39

#### 40 Diagnostic agreement between TD and TD, F2F and F2F, and TD and Histopathology

41  
42 Diagnostic agreement rates were also compared within rater groups, as well as between TD and  
43  
44 histopathology, when values were available. Diagnostic agreement rate between TDs, F2F  
45  
46 dermatologists, and TD vs histopathology were: 76.4% (CI 69% to 82.5%), 82.4% (CI 76.7% to  
47  
48 87.0%), and 55.7% (CI 53% to 58.4%). See **eFigure 2** and the supplementary appendix for further  
49  
50 details.  
51  
52  
53  
54  
55  
56  
57  
58  
59  
60

## Sub-group analyses

### Diagnostic reliability of TD when compared to the current gold standard (F2F evaluation by a dermatologist) vs non-specialist

Thirty-five studies reported diagnostic agreement rates.<sup>4, 5, 9-11, 13-20, 22, 25-33, 35-46</sup> **Figure 2A** shows that the percentage agreement between TD and F2F dermatologists ranged from 38% to 98%, with 44 out of 64 comparisons having percentage agreement above 60% and seven studies having over 90% agreement. The diagnostic agreement rate between TD and F2F dermatologist was 70.96% (CI 69.8% to 72.1%) while the diagnostic agreement rate between TD and F2F of non-specialists was 44.1% (CI 39.9% to 48.4%). When non-specialists were compared to dermatologists for F2F vs. TD the agreement rate was significantly lower among non-specialists ( $p < 0.001$ , heterogeneity:  $I^2 = 98\%$ ). The percent agreement ranged from 13.9% to 71.7%, with six out of eight having concordance values below 50%.<sup>20, 21, 23, 24, 30, 32, 34, 47</sup>

Thirteen studies with 28 unique comparisons made between TD and F2F dermatologists that reported concordance values.<sup>9, 13, 14, 19, 22, 28, 31-33, 37, 42, 49, 51</sup> When kappa concordance values were compared, **Figure 2B** shows diagnostic agreement between TD and F2F dermatologists had a mean of 0.69 (CI 0.60 to 0.75) and it ranged between 0.213 (CI 0.20 to 0.23) to 0.96 (CI 0.92 to 0.98). When comparing TDs to non-specialists, the mean concordance value for diagnostic agreement from four studies had a mean of 0.52 (CI 0.25 to 0.71).<sup>30, 32, 48, 50</sup> When non-specialists were compared to dermatologists for F2F vs. TD, diagnostic concordance was significantly lower among non-specialists ( $p = 0.031$ , heterogeneity:  $I^2 = 100\%$ ).

### Diagnostic reliability of TD vs F2F by training involved and type of technology used related to image acquisition

Twenty studies with 37 unique comparisons that compared TDs with F2F physicians stated explicitly that training was provided to those in charge of image acquisition shown in **Figure 3**.<sup>9-11, 14-16, 19, 20, 23, 26, 29, 32, 35-41, 43, 44</sup> The mean agreement rate shown in **Figure 3A** was higher at 75.9% (CI 74.4% to 77.27%) compared to no training provided 62.1% (CI 60.5% to 63.7%), and this difference was statistically significant ( $p = 0.033$ , heterogeneity:  $I^2 = 98\%$ ). Concordance values in **Figure 3B** were also higher between TD and F2F when training was provided, with a mean 0.77 (CI 0.66-0.84), and 0.60 (CI 0.49-0.69) without training. This difference was statistically significant ( $p = 0.01$ ,  $I^2=98\%$ ).

### Other sub-group analyses

Statistically significant trends related to diagnostic agreement by image capturing technologies (**eFigure 5**) were also identified. No statistically significant patterns could be identified with the use of teledermoscopy, lesion type, grouping studies as pre- or post-pandemic, or risk of bias. Please see supplementary appendix for further details.

### **Quality assessment**

The results of quality assessment for risk of bias and applicability in individual studies are displayed in the supplementary appendix and **eTable 5**.

### **Discussion:**

This study constitutes the largest systematic review and MA on TD to our knowledge, including 44 studies across four languages.

We noted an overall agreement rate of 68.9% and overall concordance of kappa = 0.67 between TDs and F2F physicians. Through sub-group analyses, we found that the agreement was significantly higher for studies that compared TD to in-person assessments by dermatologists compared to non-specialists (difference of 26.86%,  $p < 0.001$ ). The lower concordance when F2F non-specialists are used suggests that lowered reference test accuracy reduces agreement rates: and for the purposes of clinical practice, it implies a greater need for TD to supplement primary over specialist care.

We noted greater agreement rates ( $p = 0.033$ ) between in-person and remote care when standardized training on image acquisition was incorporated into clinical workflow – suggesting a benefit to training primary care providers supporting TD.<sup>24, 53, 54</sup> Digital photography was also associated with more frequent agreement rates between TD and F2F physicians ( $p = 0.029$ ). Although the exact reason for this trend is less clear, this could be attributed to better image resolution and more experienced staff taking clinical images in a standardized manner for virtual consultations.

Pathological assessment of skin lesions is the cornerstone of skin cancer diagnosis. This MA found a 55.7% (CI 53.0% to 58.4%) agreement rate between TD and histopathology. This low agreement rate reflects all skin biopsies, and specific diagnostic accuracy rates could not be calculated by

1  
2  
3 lesion type due to the small number of studies that reported this value. Through sub-group  
4 analyses, we were able to compare cancerous and non-cancerous lesions; slightly higher  
5 concordance was seen with skin cancers compared to studies that also included non-suspicious  
6 lesions like dermatitis and psoriasis. However, data was too heterogeneous for any significant  
7 conclusions. We also looked at the use of teledermoscopy, another technique that could help  
8 improve diagnostic accuracy of TD for suspicious lesions, but no significant trends could be  
9 identified. These findings reflected the results of a 2016 systematic review on TD.<sup>6</sup>  
10  
11  
12  
13  
14  
15  
16  
17  
18  
19  
20

21 Many teledermoscopy studies grouped statistics from lesions analyzed with and without  
22 dermoscopy, preventing the assessment of the dermatoscope's incremental contributions without  
23 the influence of potentially less accurate, dermatoscope-free analysis. Supporting this explanation,  
24 the three teledermoscopy studies that focused on cancer lesions demonstrated greater concordance  
25 rates than the teledermoscopy studies targeting broader lesions. One study identified agreement  
26 rates between TD and F2F dermatology of 92.3% (24/26) and between TD and histopathology of  
27 66.7% (17/26), both above our identified median.<sup>45</sup> Another study found an agreement rate of 90%  
28 (37/41) when targeting pigmented lesions, although the rate may have been inflated due to recall  
29 bias introduced by having the same dermatologist perform TD and F2F consults.<sup>16</sup> Finally, one  
30 study diagnosed keratotic lesions in sun-exposed areas, finding a high agreement rate of 92%  
31 (915/1000).<sup>37</sup> However, this study also risked bias from its experimental design, which excluded  
32 lesions with poor image quality. This fails to recapitulate the complexities of practical TD, which  
33 must contend with potentially difficult image acquisition.  
34  
35  
36  
37  
38  
39  
40  
41  
42  
43  
44  
45  
46  
47  
48  
49  
50  
51  
52  
53  
54  
55  
56  
57  
58  
59  
60

1  
2  
3 The 68.9% (CI 64.4% to 73.05%) combined agreement rate between TD and F2F is lower than the  
4 agreement rates outlined in a recent review.<sup>55</sup> This suggests our greater sample size introduces  
5 more studies with poor agreement, which may better reflect the reality of adopting TD at a larger  
6 scale and signal risk from a lack of standardization.<sup>54,55</sup> Our date cut-off of 2010 means our dataset  
7 has little overlap with existing reviews, and more heavily features new relevant technologies like  
8 smartphone apps for image acquisition.<sup>6,56</sup> The most recent MA<sup>56</sup> on TD limited its dataset to  
9 studies with multiple TD and F2F consults, and variably choosing to filter low-frequency  
10 diagnoses from certain studies.<sup>46</sup> Our results had greater heterogeneity compared to this MA,  
11 drawing attention to a key issue in the literature: unless results are heavily filtered – introducing  
12 bias, omitting most research, and weakening statistical power, the data is too heterogenous for  
13 effective metanalytic inferences. However, messy and heterogeneous data likely reflects real-  
14 world evidence and clinical practices.

15  
16  
17  
18  
19  
20  
21  
22  
23  
24  
25  
26  
27  
28  
29  
30  
31  
32  
33 A possible source of heterogeneity in our analysis could be due to lack of stratification by study  
34 design given the minute number of randomized controlled trials available for analysis. However,  
35 filtering biased studies did not improve the suitability of our data for our proposed random-effects  
36 MA model. Our review also risked publication bias by not actively seeking out unpublished  
37 materials in conference proceedings. This likely reflects the nature of clinical work, highlighting  
38 the variability across different providers and settings and reinforcing the need to develop a  
39 standardized framework for employing and assessing TD.

40  
41  
42  
43  
44  
45  
46  
47  
48  
49  
50  
51 Current trends suggest that TD will continue to expand, there have been many recent studies  
52 examining its accuracy without the design considerations necessary to allow comparisons beyond  
53

1  
2  
3 siloed investigations.<sup>1</sup> The implementation of evidence-informed processes is critical to the  
4 success of TD services, and the accurate assessment of TD will be required to assess which  
5 contexts it should be employed in, e.g., suspected malignancy vs. erythema.  
6  
7  
8  
9  
10

11  
12 The factors targeted by our sub analysis are undoubtedly important to standardize with best  
13 practices requiring the inclusion of primary care provider training in image acquisition, explicitly  
14 outlined conditions where dermatoscope attachments are required, and standardized reporting with  
15 a lesion's anatomical site, size, distribution, morphology, and colour. Additional guidelines for  
16 data reporting could be designed with a mind to future research goals, e.g., the inclusion of  
17 Fitzpatrick grading to identify gaps in medical care. Finally, both clinical and research guidelines  
18 must address privacy concerns, as the integration of EMR and the sharing of patient images or  
19 videos presents potential vulnerabilities.  
20  
21  
22  
23  
24  
25  
26  
27  
28  
29  
30  
31  
32  
33  
34  
35  
36  
37  
38  
39  
40  
41  
42  
43  
44  
45  
46  
47  
48  
49  
50  
51  
52  
53  
54  
55  
56  
57  
58  
59  
60

### **Conclusion:**

This MA indicates that diagnostic agreement between remote and in person dermatologists is acceptable in select conditions (i.e., when training for image acquisition is provided and technologies for high-quality images are used). Telemedicine adoption rates are accelerating globally, and TD must be considered for enhanced accessibility, flexibility, reduced costs, and safer environments it can provide patients.

The results of this MA represent significant evidence to indicate the suitability of TD for remote care, particularly as a complement to primary care, where it can serve as an intermediate step before F2F specialist consultations. Furthermore, the categorisation of diagnostic concordance highlights important factors to further improve diagnostic accuracy. Additionally, it highlights the lack of standardization in TD studies, calling for greater structure in clinical practice and conducting primary research.

### **Acknowledgements:**

The authors would like to acknowledge Heba Tallah Mohammed affiliated with Swift Medical for reviewing the manuscript, and for adding their valuable insight. The search strategies were developed with Abdul Kareem Pullattayil (AKP), a health science librarian at Bracken Health Sciences Library Botterell Hall at Queen's University.

### **Author Contributions:**

JLRG is the guarantor of the review and supervised study design. JLRG also contributed to data analysis and provided statistical expertise. AB and NB oversaw study design, data collection, data analysis, and original draft preparation. AB designed the search strategy with the guidance



1  
2  
3 of the medical librarian, AKP. AB, NB, MB, MM participated in the abstract and full text screen,  
4 data extraction, and risk of bias assessment. RDJF, AL, and SCW contributed to draft review and  
5 editing. All authors read, provided feedback and approved the final manuscript.  
6  
7  
8  
9  
10

### 11 12 **Funding:**

13  
14 This work was supported by the Digital Technology Supercluster as part of the Telewound Care  
15 Canada project. The funder was not involved in the design or analysis of this study.  
16  
17  
18  
19  
20  
21  
22

### 23 **Competing interests:**

24 JLRG, RDJF, AL are employees, and SCW is a co-founder, medical chief officer, and  
25 shareholder of Swift Medical. No funding bodies have any role in study design, data collection  
26 and analysis, decision to publish, or preparation of the manuscript. All other authors declare no  
27 conflict of interest.  
28  
29  
30  
31  
32  
33  
34  
35  
36

### 37 **Data availability statement:**

38 Data are available in a public, open access repository. All data relevant to the study are included  
39 in the article, uploaded as supplementary information, or deposited on Open Science Framework:  
40 <https://osf.io/fjdvg>. Data are available under the terms of the Creative Commons Zero “No rights  
41 reserved” data waiver (CC0 1.0 Public domain dedication). Our systematic review produced a  
42 large amount of information, and the arising database is available for future collaboration on  
43 additional analyses. Please contact the corresponding author with any inquiries.  
44  
45  
46  
47  
48  
49  
50  
51  
52  
53

### 54 **Patient consent for publication:**

55 Not required.  
56  
57  
58  
59  
60

**Abstract word count:** 292 words; **Manuscript word count:** 3104 words

For peer review only

## References

1. Mohammed HT, Hyseni L, Bui V, et al. Exploring the use and challenges of implementing virtual visits during COVID-19 in primary care and lessons for sustained use. *PLoS One*. 2021;16(6):e0253665. doi:10.1371/journal.pone.0253665
2. Armstrong AW, Chambers CJ, Maverakis E, et al. Effectiveness of Online vs In-Person Care for Adults With Psoriasis: A Randomized Clinical Trial. *JAMA Network Open*. 2018;1(6):e183062-e183062. doi:10.1001/jamanetworkopen.2018.3062
3. Wang RH, Barbieri JS, Nguyen HP, et al. Clinical effectiveness and cost-effectiveness of teledermatology: Where are we now, and what are the barriers to adoption? *Journal of the American Academy of Dermatology*. 2020;83(1):299-307. doi:10.1016/j.jaad.2020.01.065
4. Okita AL, Molina Tinoco LJ, Criado PR, et al. Use of Smartphones in Telemedicine: Comparative Study Between Standard and Teledermatological Evaluation of High-Complex Care Hospital Inpatients. *Telemedicine journal and e-health : the official journal of the American Telemedicine Association*. 2016;22(9):755-760. doi:<http://dx.doi.org/10.1089/tmj.2015.0086>
5. Saleh N, Abdel Hay R, Hegazy R, Hussein M, Gomaa D. Can teledermatology be a useful diagnostic tool in dermatology practice in remote areas? An Egyptian experience with 600 patients. *Journal of telemedicine and telecare*. 2017;23(2):233-238. doi:<http://dx.doi.org/10.1177/1357633X16633944>
6. Finnane A, Dallest K, Janda M, Soyer HP. Teledermatology for the Diagnosis and Management of Skin Cancer: A Systematic Review. *JAMA Dermatol*. Mar 1 2017;153(3):319-327. doi:10.1001/jamadermatol.2016.4361
7. Moher D, Shamseer L, Clarke M, et al. Preferred reporting items for systematic review and meta-analysis protocols (PRISMA-P) 2015 statement. *Syst Rev*. Jan 1 2015;4(1):1. doi:10.1186/2046-4053-4-1
8. Brewer AC, Endly DC, Henley J, et al. Mobile applications in dermatology. *JAMA Dermatol*. Nov 2013;149(11):1300-4. doi:10.1001/jamadermatol.2013.5517
9. Rios-Yuil JM. [Correlation between face-to-face assessment and telemedicine for the diagnosis of skin disease in case conferences]. *Actas dermo-sifiliograficas*. 2012;103(2):138-43. doi:<https://dx.doi.org/10.1016/j.ad.2011.05.011>
10. Romero Aguilera G, Cortina De La Calle P, Vera Iglesias E, Sanchez Caminero P, Garcia Arpa M, Garrido Martin JA. Interobserver reliability of store-and-forward teledermatology in a clinical practice setting. *Actas Dermo-Sifiliograficas*. 2014;105(6):605-613. doi:<http://dx.doi.org/10.1016/j.adengl.2014.05.018>
11. Romero G, Sanchez P, Garcia M, Cortina P, Vera E, Garrido JA. Randomized controlled trial comparing store-and-forward teledermatology alone and in combination with web-camera videoconferencing. *Clinical and Experimental Dermatology*. 2010;35(3):311-317. doi:<http://dx.doi.org/10.1111/j.1365-2230.2009.03503.x>
12. Sterne JAC, Savović J, Page MJ, et al. RoB 2: a revised tool for assessing risk of bias in randomised trials. *BMJ*. 2019;366:l4898. doi:10.1136/bmj.l4898
13. Altieri L, Hu J, Nguyen A, et al. Interobserver reliability of teledermatology across all Fitzpatrick skin types. *Journal of telemedicine and telecare*. 2017;23(1):68-73. doi:<http://dx.doi.org/10.1177/1357633X15621226>
14. Castelo-Soccio L, Kovarik CL, Azfar RS, et al. Reliability and validity of mobile teledermatology in human immunodeficiency virus-positive patients in botswana a pilot study.

1  
2  
3  
4  
5  
6  
7  
8  
9  
10  
11  
12  
13  
14  
15  
16  
17  
18  
19  
20  
21  
22  
23  
24  
25  
26  
27  
28  
29  
30  
31  
32  
33  
34  
35  
36  
37  
38  
39  
40  
41  
42  
43  
44  
45  
46  
47  
48  
49  
50  
51  
52  
53  
54  
55  
56  
57  
58  
59  
60

*JAMA Dermatology*. 2014;150(6):601-607.

doi:<http://dx.doi.org/10.1001/jamadermatol.2013.7321>

15. Barbieri JS, Nelson CA, James WD, et al. The reliability of teledermatology to triage inpatient dermatology consultations. *JAMA Dermatology*. 2014;150(4):419-424.

doi:<http://dx.doi.org/10.1001/jamadermatol.2013.9517>

16. Barcaui CB, Lima PMO. Application of teledermoscopy in the diagnosis of pigmented lesions. *International Journal of Telemedicine and Applications*. 2018;2018((Barcaui) Adjunct Professor of Dermatology, Faculty of Medical Sciences, State University of Rio de Janeiro, PhD in Medicine (Dermatology), University of Sao Paulo, Dermatology Department, Pedro Ernesto University Hospital, Rio de Janeiro State University):1624073.

doi:<http://dx.doi.org/10.1155/2018/1624073>

17. Batalla A, Suh-Oh HJ, Abalde T, Salgado-Boquete L, de la Torre C. Teledermatology in Paediatrics. Observations in daily clinical practice. *Anales de pediatria (Barcelona, Spain : 2003)*. 2016;84(6):324-330. doi:<http://dx.doi.org/10.1016/j.anpedi.2015.07.005>

doi:<http://dx.doi.org/10.1016/j.anpedi.2015.07.005>

18. Borge A, Holst A, Gente-Lidholm A, Molina-Martinez R, Paoli J. Use of the mobile phone multimedia messaging service for teledermatology. *Journal of Telemedicine and Telecare*. 2012;18(5):292-296. doi:<http://dx.doi.org/10.1258/jtt.2012.120206>

19. Borge A, Terstappen K, Sandberg C, Paoli J. Mobile teledermoscopy-there's an app for that! *Dermatology practical & conceptual*. 2013;3(2):41-8.

doi:<https://dx.doi.org/10.5826/dpc.0302a05>

20. Carter ZA, Li X, Goldman S, et al. Creation of an internal teledermatology store-and-forward system in an existing electronic health record: A pilot study in a safety-net public health and hospital system. *JAMA Dermatology*. 2017;153(7):644-650.

doi:<http://dx.doi.org/10.1001/jamadermatol.2017.0204>

21. Chen TS, Goldyne ME, Mathes EFD, Frieden IJ, Gilliam AE. Pediatric teledermatology: Observations based on 429 consults. *Journal of the American Academy of Dermatology*.

2010;62(1):61-66. doi:<http://dx.doi.org/10.1016/j.jaad.2009.05.039>

22. Clarke EL, Reichenberg JS, Ahmed AM, et al. The utility of teledermatology in the evaluation of skin lesions. *Journal of telemedicine and telecare*. 2021;(9506702,

cpj):1357633X20987423. doi:<https://dx.doi.org/10.1177/1357633X20987423>

23. Costello CM, Cumsy HJL, Maly CJ, et al. Improving Access to Care Through the Establishment of a Local, Teledermatology Network. *Telemedicine journal and e-health : the official journal of the American Telemedicine Association*. 2020;26(7):935-940.

doi:<https://dx.doi.org/10.1089/tmj.2019.0051>

24. Duong TA, Cordoliani F, Julliard C, et al. Emergency department diagnosis and management of skin diseases with real-time teledermatologic expertise. *JAMA Dermatology*.

2014;150(7):743-747. doi:<http://dx.doi.org/10.1001/jamadermatol.2013.7792>

25. Gabel CK, Nguyen E, Karmouta R, et al. Use of teledermatology by dermatology hospitalists is effective in the diagnosis and management of inpatient disease. *Journal of the American Academy of Dermatology*. 2021;84(6):1547-1553.

doi:<https://dx.doi.org/10.1016/j.jaad.2020.04.171>

26. Gatica JL, Bertolo S, Morales E, Espinoza M, Contreras C. Store-and-forward teledermatology in Chile: A contribution to primary health care. *Piel*. 2015;30(3):148-154.

doi:<http://dx.doi.org/10.1016/j.piel.2014.07.007>

- 1  
2  
3 27. Gerhardt CA, Foels R, Grewe S, Baldwin BT. Assessing the Diagnostic Accuracy of  
4 Tele dermatology Consultations at a Local Veterans Affairs Dermatology Clinic. *Cureus*.  
5 2021;13(6):e15406. doi:<https://dx.doi.org/10.7759/cureus.15406>  
6  
7 28. Giavina-Bianchi M, Azevedo MFD, Sousa RM, Cordioli E. Part II: Accuracy of  
8 Tele dermatology in Skin Neoplasms. *Frontiers in medicine*. 2020;7(101648047):598903.  
9 doi:<https://dx.doi.org/10.3389/fmed.2020.598903>  
10  
11 29. Giavina-Bianchi M, Sousa R, Cordioli E. Part I: Accuracy of Tele dermatology in  
12 Inflammatory Dermatoses. *Frontiers in medicine*. 2020;7(101648047):585792.  
13 doi:<https://dx.doi.org/10.3389/fmed.2020.585792>  
14  
15 30. Keller JJ, Johnson JP, Latour E. Inpatient tele dermatology: Diagnostic and therapeutic  
16 concordance among a hospitalist, dermatologist, and tele dermatologist using store-and-forward  
17 tele dermatology. *Journal of the American Academy of Dermatology*. 2020;82(5):1262-1267.  
18 doi:<https://dx.doi.org/10.1016/j.jaad.2020.01.030>  
19  
20 31. Lamel SA, Haldeman KM, Ely H, Armstrong AW, Kovarik CL, Pak H. Application of  
21 mobile tele dermatology for skin cancer screening. *Journal of the American Academy of*  
22 *Dermatology*. 2012;67(4):576-581. doi:<http://dx.doi.org/10.1016/j.jaad.2011.11.957>  
23  
24 32. Muir J, Xu C, Singh P, et al. Incorporating tele dermatology into emergency medicine.  
25 *EMA - Emergency Medicine Australasia*. 2011;23(5):562-568.  
26 doi:<http://dx.doi.org/10.1111/j.1742-6723.2011.01443.x>  
27  
28 33. Nami N, Rubegni P, Fimiani M, Massone C, Hofmann-Wellenhof R, Cevenini G.  
29 Concordance and Time Estimation of Store-and-Forward Mobile Tele dermatology Compared to  
30 Classical Face-to-Face Consultation. *Acta Dermato-Venereologica*. 2015;95(1):35-39.  
31 doi:<http://dx.doi.org/10.2340/00015555-1876>  
32  
33 34. Patro BK, Tripathy JP, De D, Sinha S, Singh A, Kanwar AJ. Diagnostic agreement  
34 between a primary care physician and a tele dermatologist for common dermatological conditions  
35 in North India. *Indian dermatology online journal*. 2015;6(1):21-6.  
36 doi:<https://dx.doi.org/10.4103/2229-5178.148927>  
37  
38 35. Ribas J, Schettini APM, Ribas CBDR, Cunha MDGS. Agreement between  
39 dermatological diagnoses made by live examination compared to analysis of digital images.  
40 *Anais Brasileiros de Dermatologia*. 2010;85(4):441-447. doi:[http://dx.doi.org/10.1590/s0365-](http://dx.doi.org/10.1590/s0365-05962010000400004)  
41 [05962010000400004](http://dx.doi.org/10.1590/s0365-05962010000400004)  
42  
43 36. Rubegni P, Nami N, Poggiali S, et al. Geriatric tele dermatology: Store-and-forward vs.  
44 face-to-face examination. *Journal of the European Academy of Dermatology and Venereology*.  
45 2011;25(11):1334-1339. doi:<http://dx.doi.org/10.1111/j.1468-3083.2011.03986.x>  
46  
47 37. Sola-Ortigosa J, Munoz-Santos C, Masat-Tico T, Isidro-Ortega J, Guilabert A, Grup  
48 d'Estudi de Tele dermatologia del Valles O. The Role of Tele dermatology and Tele dermatoscopy in  
49 the Diagnosis of Actinic Keratosis and Field Cancerization. *The Journal of investigative*  
50 *dermatology*. 2020;140(10):1976-1984.e4. doi:<https://dx.doi.org/10.1016/j.jid.2020.02.013>  
51  
52 38. Tan E, Yung A, Oakley A, Rademaker M, Jameson M. Successful triage of patients  
53 referred to a skin lesion clinic using tele dermatoscopy (IMAGE IT trial). *British Journal of*  
54 *Dermatology*. 2010;162(4):803-811. doi:<http://dx.doi.org/10.1111/j.1365-2133.2010.09673.x>  
55  
56 39. Tran K, Ayad M, Monir S, et al. Mobile tele dermatology in the developing world:  
57 Implications of a feasibility study on 30 Egyptian patients with common skin diseases. *Journal*  
58 *of the American Academy of Dermatology*. 2011;64(2):302-309.  
59 doi:<https://dx.doi.org/10.1016/j.jaad.2010.01.010>  
60



- 1  
2  
3 40. Vano-Galvan S, Aguayo-Leiva I, Rios-Buceta L, et al. Store-and-forward  
4 teledermatology: Assessment of validity in a series of 2000 observations. *Actas Dermo-*  
5 *Sifiliograficas*. 2011;102(4):277-283. doi:[http://dx.doi.org/10.1016/S1578-2190\(11\)70803-4](http://dx.doi.org/10.1016/S1578-2190(11)70803-4)  
6  
7 41. Vestergaard T, Prasad SC, Schuster A, Laurinaviciene R, Andersen MK, Bygum A.  
8 Diagnostic accuracy and interobserver concordance: teledermoscopy of 600 suspicious skin  
9 lesions in Southern Denmark. *Journal of the European Academy of Dermatology and*  
10 *Venereology : JEADV*. 2020;34(7):1601-1608. doi:<https://dx.doi.org/10.1111/jdv.16275>  
11  
12 42. Gravely AA, Warshaw EM, Nelson DB. Reliability of store and forward teledermatology  
13 for skin neoplasms. *Journal of the American Academy of Dermatology*. 2015;72(3):426-435.  
14 doi:<http://dx.doi.org/10.1016/j.jaad.2014.11.001>  
15  
16 43. Zanini M. Analyze of diagnostic concordance between face-to-face and teledermatology  
17 diagnosis. *Medicina Cutanea Ibero-Latino-Americana*. 2013;41(2):60-62.  
18 doi:<http://dx.doi.org/10.4464/MC.2013.41.2.5058>  
19  
20 44. Zink A, Kolbinger A, Leibl M, et al. The value of teledermatology using a mobile app  
21 compared to conventional dermatology. *European Journal of Dermatology*. 2017;27(4):429-431.  
22 doi:<http://dx.doi.org/10.1684/ejd.2017.3044>  
23  
24 45. Zink A, Kolbinger A, Leibl M, et al. Teledermoscopy by mobile phones: Reliable help in  
25 the diagnosis of skin lesions? *Hautarzt*. 2017;68(11):890-895.  
26 doi:<http://dx.doi.org/10.1007/s00105-017-4042-0>  
27  
28 46. Marchell R, Locatis C, Liu W-L, Ackerman M, Burges G, Maisiak R. Comparing High  
29 Definition Live Interactive and Store-and-Forward Consultations to In-Person Examinations.  
30 *Telemedicine journal and e-health : the official journal of the American Telemedicine*  
31 *Association*. 2017;23(3):213-218. doi:<http://dx.doi.org/10.1089/tmj.2016.0093>  
32  
33 47. Jones L, Jameson M, Oakley A. Remote Skin Cancer Diagnosis: Adding Images to  
34 Electronic Referrals Is More Efficient Than Wait-Listing for a Nurse-Led Imaging Clinic.  
35 *Cancers (Basel)*. Nov 20 2021;13(22)doi:10.3390/cancers13225828  
36  
37 48. Gonzalez Coloma F, Sandoval Garces M, Gedda Quiroga V, Bley Banda C.  
38 Teledermatology in Remote Parts of Chile: Experience in 4 Isolated Rural Areas. *Actas dermo-*  
39 *sifiliograficas*. 2019;110(8):653-658. doi:<https://dx.doi.org/10.1016/j.ad.2019.01.009>  
40  
41 49. Goulart Silveira CE, Carcano C, Mauad EC, Faleiros H, Longatto-Filho A. Call phone  
42 usefulness to improve the skin cancer screening: preliminary results and critical analysis of  
43 mobile app development. *Rural & Remote Health*. 2019;19(1):1-7. doi:10.22605/RRH4895  
44  
45 50. Piccoli MF, Amorim BDB, Wagner HM, Nunes DH. Teledermatology protocol for  
46 screening of Skin cancer. *Anais Brasileiros de Dermatologia*. 2015;90(2):202-210.  
47 doi:<http://dx.doi.org/10.1590/abd1806-4841.20153163>  
48  
49 51. Senel E, Baba M, Durdu M. The contribution of teledermatoscopy to the diagnosis and  
50 management of non-melanocytic skin tumours. *Journal of Telemedicine and Telecare*.  
51 2013;19(1):60-63. doi:<http://dx.doi.org/10.1177/1357633X12474961>  
52  
53 52. Gravely AA, Nelson DB, Warshaw EM. Accuracy of teledermatology/teledermoscopy  
54 and clinic-based dermatology for specific categories of skin neoplasms. *Journal of the American*  
55 *Academy of Dermatology*. 2010;63(2):348-352. doi:<http://dx.doi.org/10.1016/j.jaad.2009.10.037>  
56  
57 53. Massone C, Javor S, Amato I, Biondo G, Brunasso AMG, Hofmann-Wellenhof R.  
58 Training of primary care physicians enhances performance of mobile teledermatology. *Anais*  
59 *brasileiros de dermatologia*. 2021;96(4):514-516.  
60 doi:<https://dx.doi.org/10.1016/j.abd.2020.07.017>

- 1  
2  
3 54. Finnane A, Curiel-Lewandrowski C, Wimberley G, et al. Proposed Technical Guidelines  
4 for the Acquisition of Clinical Images of Skin-Related Conditions. *JAMA Dermatol*. May 1  
5 2017;153(5):453-457. doi:10.1001/jamadermatol.2016.6214  
6  
7 55. Lee JJ, English JC, 3rd. Teledermatology: A Review and Update. *Am J Clin Dermatol*.  
8 Apr 2018;19(2):253-260. doi:10.1007/s40257-017-0317-6  
9 56. Bastola M, Locatis C, Fontelo P. Diagnostic Reliability of In-Person Versus Remote  
10 Dermatology: A Meta-Analysis. *Telemed J E Health*. Mar 2021;27(3):247-250.  
11 doi:10.1089/tmj.2020.0043  
12  
13  
14  
15  
16  
17  
18  
19  
20  
21  
22  
23  
24  
25  
26  
27  
28  
29  
30  
31  
32  
33  
34  
35  
36  
37  
38  
39  
40  
41  
42  
43  
44  
45  
46  
47  
48  
49  
50  
51  
52  
53  
54  
55  
56  
57  
58  
59  
60

## Figure Legends

**Figure 1. PRISMA Flow diagram of study selection.**

**Figure 2. Forest plot representing F2F and TD primary diagnostic agreement by specialization status of the F2F physician.** Studies were sorted into two groups, a) F2F diagnosis completed by a board-certified dermatologist; b) F2F diagnosis completed by a non-specialist (e.g., general practitioner). **(A)** Forest plot representing percentage agreement and 95% C.I. for overall concordance across 40 studies with a total of 72 unique number of comparisons, N of events and total included participants. **(B)** Forest plot representing kappa concordance and 95% C.I. for overall concordance across 21 studies with a total of 45 unique number of comparisons, N of total included participants.

**Figure 3. Forest plot representing F2F and TD primary diagnostic agreement by whether imaging acquisition training was indicated by the study.**

Forest plot representing F2F and TD primary diagnostic agreement when image acquisition training is involved. Studies were sorted into two groups, a) Did not conduct or did not report training personnel on image acquisition; b) Stated that person in charge of image acquisition was trained. **(A)** Forest plot representing percentage agreement and 95% C.I. for overall concordance across 39 studies with a total of 71 unique number of comparisons, N of events and total included participants. **(B)** Forest plot representing kappa concordance and 95% C.I. for overall concordance across 21 studies with a total of 45 unique number of comparisons, N of total included participants.



## Tables

A

| TD vs Derm                        |                            |                                                |                                                                                                               |                                                                                                                      |                |
|-----------------------------------|----------------------------|------------------------------------------------|---------------------------------------------------------------------------------------------------------------|----------------------------------------------------------------------------------------------------------------------|----------------|
| Source                            | Study design               | Country of publ., Study reported funding (Y/N) | Intervention Assessment of diagnostic agreement between...                                                    | Outcomes Comparing complete primary diagnostic agreement between F2F and TD (and between Histo and TD if applicable) | Quality rating |
| <b>Standard of reference: F2F</b> |                            |                                                |                                                                                                               |                                                                                                                      |                |
| Azfar, et al, 2014                | Prospective Cohort Study   | Botswana, N                                    | TD and F2F dermatologists via smartphone images                                                               | Diagnostic agreement rate (TD1 46.6%, TD2 56.8%, TD3 48.6%) concordance (TD1 0.41, TD2 0.51, TD3 0.43), N=136        | Low            |
| Barcaui, et al, 2018              | Prospective Cohort Study   | Brazil, N                                      | TD and F2F consult by the same dermatologist via digital photography and dermoscopy images stored in WhatsApp | Diagnostic agreement rate (90%, N=41)                                                                                | High           |
| Batalla, 2015                     | Retrospective Cohort Study | Spain, N                                       | TD and F2F dermatologists by via clinical images                                                              | Diagnostic agreement rate (55%, N=65)                                                                                | Moderate       |
| Borve, et al, 2012                | Prospective Cohort Study   | Sweden, Y                                      | TD and F2F consults by the same dermatologist via smartphone images stored in Tele-Dermis                     | Diagnostic agreement rate (78%, N=40)                                                                                | High           |
| Gatica, et al, 2015               | Prospective Cohort Study   | Chile, N                                       | TD and F2F dermatologists via clinical images taken by digital photography                                    | Diagnostic agreement rate (82%, N=125)                                                                               | Moderate       |
| Gerhardt, et al, 2021             | Observational study        | USA, Y                                         | TD and F2F dermatologists via clinical images                                                                 | Diagnostic agreement rate (75.3%, N=809)                                                                             | High           |
| Keller, et al, 2020               | Prospective Cohort Study   | USA, Y                                         | TD and F2F dermatologists or hospitalists on clinical images taken by smartphones and tablets                 | Derm vs TD: Diagnostic agreement rate (52.5%), concordance (0.45)                                                    | Low            |
| Marchell, et al., 2017            | Quasi RCT                  | USA, Y                                         | TD and F2F dermatologists via digital photography, compressed and uncompressed video                          | SFTD: Diagnostic agreement rate (76%, N=213); uncompressed video (76%, N=101), compressed video (72%, N=112)         | Low            |
| Muir, et al,                      | Prospective                | Australia,                                     | TD and F2F                                                                                                    | Derm vs TD:                                                                                                          | High           |

Skin cancer, and other common dermatological lesions

|                              |                                      |                      |                                                                                                                                                                               |                                                                   |          |
|------------------------------|--------------------------------------|----------------------|-------------------------------------------------------------------------------------------------------------------------------------------------------------------------------|-------------------------------------------------------------------|----------|
| 2011                         | Cohort Study                         | N                    | emergency derms and non-specialists via clinical images taken by digital photography                                                                                          | Diagnostic agreement rate (98%), concordance (0.93)               |          |
| Nami, et al, 2015            | Prospective Cohort Study             | Italy and Austria, Y | TD and F2F dermatologists via smartphone images stored in MugDerma                                                                                                            | Diagnostic agreement rate (91.05%), concordance (0.906), N=391    | High     |
| Okita, et al, 2016           | Prospective Cohort Study             | Brazil, N            | TD and F2F dermatologists via smartphone images                                                                                                                               | Diagnostic agreement rate (54%, N=100)                            | High     |
| Ribas, et al, 2010           | Prospective Study                    | Brazil, Y            | TD and F2F dermatologists via digital photography                                                                                                                             | Diagnostic agreement rate (81.5%) concordance (0.8), N=174        | High     |
| Romero Aguilera, et al, 2014 | Prospective Cohort Study             | Spain, Y             | TD and F2F dermatologists via clinical images taken by digital photography stored in DERMARED. A small portion of patients were seen by the same Derm for F2F and TD consult. | Diagnostic agreement rate (77.8%, N=170)                          | Moderate |
| Romero, et al, 2010          | Randomized Controlled Trial          | Spain, Y             | TD and F2F consults by the same dermatologist via digital photography and videoconferences via DERMARED software                                                              | Diagnostic agreement rate (85%, N=368)                            | Moderate |
| Rubegni, et al, 2011         | Prospective Cohort Study             | Italy, N             | TD and F2F dermatologists via digital photography and dermoscopy images stored in Dermo-image.                                                                                | Diagnostic agreement rate (87.7%), concordance (0.863), N=130     | Low      |
| Saleh, et al, 2017           | Prospective Cohort Study             | Egypt, Y             | TD and F2F dermatologists via clinical images taken by digital photography stored in Dropbox                                                                                  | Diagnostic agreement rate (81.3%), concordance (0.46-0.52), N=600 | Low      |
| Vano-Galvan, et al, 2010     | Retrospective, Cross-sectional study | Spain, N             | TD and F2F dermatologists via clinical images taken by digital photography for case conferences                                                                               | Diagnostic agreement rate (69.05%, N=2000)                        | High     |
| Zanini, 2013                 | Prospective Cohort Study             | Brazil, N            | TD and F2F dermatologists via clinical images taken by digital photography                                                                                                    | Diagnostic agreement rate (76.3%, N=100)                          | Moderate |
| Carter, et al, 2017          | Prospective and retrospective        | USA, Y               | TD and F2F dermatologists, as well as F2F PCP via                                                                                                                             | Derm vs TD: Diagnostic agreement rate                             | High     |

Skin  
cat  
lesions

|                                                       |                                    |            |                                                                                         |                                                                                                                                                                                                                                                                                                                                        |          |
|-------------------------------------------------------|------------------------------------|------------|-----------------------------------------------------------------------------------------|----------------------------------------------------------------------------------------------------------------------------------------------------------------------------------------------------------------------------------------------------------------------------------------------------------------------------------------|----------|
|                                                       | cohort study                       |            | clinical images stored using Epic EHR software                                          | (38%)                                                                                                                                                                                                                                                                                                                                  |          |
| Lamel, et al, 2012                                    | Prospective Cohort Study           | USA, N     | TD and F2F dermatologists via smartphone images stored in ClickDerm                     | Diagnostic agreement rate (62%), concordance (0.6) N=107                                                                                                                                                                                                                                                                               | Moderate |
| Vestergaard, et al, 2020                              | Prospective Cohort Study           | Denmark, N | TD and F2F dermatologists via smartphone and dermoscopy images using FotoFinder Systems | F2F: Diagnostic agreement rate (TD1 62%, TD2 60.2%), concordance (TD1 0.58, TD2 0.57), N=600<br>Histo: Diagnostic agreement rate (TD1 58.2%, TD2 53.6%), N=292                                                                                                                                                                         | High     |
| Warshaw, et al, 2015                                  | Prospective, Cross-sectional study | USA, N     | TD and F2F dermatologists via digital photography and dermoscopy images                 | Diagnostic agreement rate and concordance*<br>A1 (75.70%, 0.56), N=753<br>A2 (75.30%, 0.56), N=752<br>A3 (80.10%, 0.62), N=684<br>B1 (52.80%, 0.44), N=651<br>B2 (53.40%, 0.45), N=652<br>B3 (60.00%, 0.52), N=595<br>C1 (51.50%, 0.38), N=583<br>C2 (50.20%, 0.38), N=579<br>D1 (45.70%, 0.32), N=1,034<br>D2 (50.10%, 0.37), N=1,020 | Moderate |
| Zink, et al, 2017, Sept                               | Prospective Cohort Study           | Germany, Y | TD and F2F dermatologists via smartphone and dermoscopy images using Handyfotos         | F2F: Diagnostic agreement rate (92.3%)<br>Histo: Diagnostic agreement rate (66.7%), N=26                                                                                                                                                                                                                                               | Low      |
| Giavina-Bianchi, et al, 2020 Oct                      | Retrospective Cohort Study         | Brazil, N  | TD and F2F dermatologists via smartphone images                                         | Diagnostic agreement rate (78%) concordance (0.743), N=739                                                                                                                                                                                                                                                                             | High     |
| <b>Standards of reference: F2F and Histopathology</b> |                                    |            |                                                                                         |                                                                                                                                                                                                                                                                                                                                        |          |

Skin lesions other than neoplasms

|    |                                  |                                             |            |                                                                                                                           |                                                                                                                                                                                                                                                                                                                                                                                                                                                 |          |
|----|----------------------------------|---------------------------------------------|------------|---------------------------------------------------------------------------------------------------------------------------|-------------------------------------------------------------------------------------------------------------------------------------------------------------------------------------------------------------------------------------------------------------------------------------------------------------------------------------------------------------------------------------------------------------------------------------------------|----------|
| 1  |                                  |                                             |            |                                                                                                                           |                                                                                                                                                                                                                                                                                                                                                                                                                                                 |          |
| 2  |                                  |                                             |            |                                                                                                                           |                                                                                                                                                                                                                                                                                                                                                                                                                                                 |          |
| 3  |                                  |                                             |            |                                                                                                                           |                                                                                                                                                                                                                                                                                                                                                                                                                                                 |          |
| 4  | Rios-Yuil, 2011                  | Randomized Controlled Trial                 | Panama     | TD and F2F dermatologists via clinical images taken by digital photography for case conferences                           | F2F: Diagnostic agreement rate (83.3%), concordance (0.652)<br>Histo: Diagnostic agreement rate (66.7%) N=30                                                                                                                                                                                                                                                                                                                                    | Moderate |
| 5  |                                  |                                             |            |                                                                                                                           |                                                                                                                                                                                                                                                                                                                                                                                                                                                 |          |
| 6  |                                  |                                             |            |                                                                                                                           |                                                                                                                                                                                                                                                                                                                                                                                                                                                 |          |
| 7  |                                  |                                             |            |                                                                                                                           |                                                                                                                                                                                                                                                                                                                                                                                                                                                 |          |
| 8  |                                  |                                             |            |                                                                                                                           |                                                                                                                                                                                                                                                                                                                                                                                                                                                 |          |
| 9  |                                  |                                             |            |                                                                                                                           |                                                                                                                                                                                                                                                                                                                                                                                                                                                 |          |
| 10 | Zink, et al, 2017, July          | Prospective Cohort Study                    | Germany, Y | TD and F2F dermatologists via smartphone images stored in the KLARA app                                                   | F2F: Diagnostic agreement rate (58.9%, N=195)<br>Histo: Diagnostic agreement rate (55.6%, N=195)                                                                                                                                                                                                                                                                                                                                                | High     |
| 11 |                                  |                                             |            |                                                                                                                           |                                                                                                                                                                                                                                                                                                                                                                                                                                                 |          |
| 12 |                                  |                                             |            |                                                                                                                           |                                                                                                                                                                                                                                                                                                                                                                                                                                                 |          |
| 13 |                                  |                                             |            |                                                                                                                           |                                                                                                                                                                                                                                                                                                                                                                                                                                                 |          |
| 14 |                                  |                                             |            |                                                                                                                           |                                                                                                                                                                                                                                                                                                                                                                                                                                                 |          |
| 15 |                                  |                                             |            |                                                                                                                           |                                                                                                                                                                                                                                                                                                                                                                                                                                                 |          |
| 16 | Giavina-Bianchi, et al, 2020 Nov | Retrospective Cohort Study                  | Brazil, N  | TD and F2F dermatologists via smartphone images                                                                           | F2F: Diagnostic agreement rate (61%), concordance (0.213), N=803<br>Histo: Diagnostic agreement rate (54%), concordance (0.087), N=289                                                                                                                                                                                                                                                                                                          | High     |
| 17 |                                  |                                             |            |                                                                                                                           |                                                                                                                                                                                                                                                                                                                                                                                                                                                 |          |
| 18 |                                  |                                             |            |                                                                                                                           |                                                                                                                                                                                                                                                                                                                                                                                                                                                 |          |
| 19 |                                  |                                             |            |                                                                                                                           |                                                                                                                                                                                                                                                                                                                                                                                                                                                 |          |
| 20 |                                  |                                             |            |                                                                                                                           |                                                                                                                                                                                                                                                                                                                                                                                                                                                 |          |
| 21 |                                  |                                             |            |                                                                                                                           |                                                                                                                                                                                                                                                                                                                                                                                                                                                 |          |
| 22 |                                  |                                             |            |                                                                                                                           |                                                                                                                                                                                                                                                                                                                                                                                                                                                 |          |
| 23 |                                  |                                             |            |                                                                                                                           |                                                                                                                                                                                                                                                                                                                                                                                                                                                 |          |
| 24 | Senel, et al, 2013               | Prospective Cohort Study, Repeated measures | Turkey, N  | TD and F2F dermatologists via digital photography and dermoscopy images                                                   | <b>Without dermoscopy:</b><br>Concordance (TD1 0.77, TD2 0.75), N=150<br><b>With dermoscopy:</b><br>Concordance (TD1 0.85, TD2: 0.86), N=150                                                                                                                                                                                                                                                                                                    | High     |
| 25 |                                  |                                             |            |                                                                                                                           |                                                                                                                                                                                                                                                                                                                                                                                                                                                 |          |
| 26 |                                  |                                             |            |                                                                                                                           |                                                                                                                                                                                                                                                                                                                                                                                                                                                 |          |
| 27 |                                  |                                             |            |                                                                                                                           |                                                                                                                                                                                                                                                                                                                                                                                                                                                 |          |
| 28 |                                  |                                             |            |                                                                                                                           |                                                                                                                                                                                                                                                                                                                                                                                                                                                 |          |
| 29 |                                  |                                             |            |                                                                                                                           |                                                                                                                                                                                                                                                                                                                                                                                                                                                 |          |
| 30 |                                  |                                             |            |                                                                                                                           |                                                                                                                                                                                                                                                                                                                                                                                                                                                 |          |
| 31 |                                  |                                             |            |                                                                                                                           |                                                                                                                                                                                                                                                                                                                                                                                                                                                 |          |
| 32 | Sola-Ortigosa, et al, 2020       | Prospective Cohort Study                    | Spain, N   | TD and F2F consults by the same dermatologist via dermoscopy and clinical images taken by digital photography and tablets | <b>Without dermoscopy</b><br>F2F: Diagnostic agreement rate (TD1 82.1%, TD2 83.2%, TD3 81.3%), concordance (TD1 0.87, TD2 0.83, TD3 0.89)<br>Histo: Diagnostic agreement rate (TD1 87.5%, TD2 83.5%, TD3 88.4%), N=1000<br><b>With dermoscopy</b><br>F2F: Diagnostic agreement rate (TD1 91.5%, TD2 90.2%, TD3 89.9%), concordance (TD1 0.91, TD2 0.90, TD3 0.89)<br>Histo: Diagnostic agreement rate (TD1 91.5%, TD2 91.2%, TD3 90.3%), N=1000 | High     |
| 33 |                                  |                                             |            |                                                                                                                           |                                                                                                                                                                                                                                                                                                                                                                                                                                                 |          |
| 34 |                                  |                                             |            |                                                                                                                           |                                                                                                                                                                                                                                                                                                                                                                                                                                                 |          |
| 35 |                                  |                                             |            |                                                                                                                           |                                                                                                                                                                                                                                                                                                                                                                                                                                                 |          |
| 36 |                                  |                                             |            |                                                                                                                           |                                                                                                                                                                                                                                                                                                                                                                                                                                                 |          |
| 37 |                                  |                                             |            |                                                                                                                           |                                                                                                                                                                                                                                                                                                                                                                                                                                                 |          |
| 38 |                                  |                                             |            |                                                                                                                           |                                                                                                                                                                                                                                                                                                                                                                                                                                                 |          |
| 39 |                                  |                                             |            |                                                                                                                           |                                                                                                                                                                                                                                                                                                                                                                                                                                                 |          |
| 40 |                                  |                                             |            |                                                                                                                           |                                                                                                                                                                                                                                                                                                                                                                                                                                                 |          |
| 41 |                                  |                                             |            |                                                                                                                           |                                                                                                                                                                                                                                                                                                                                                                                                                                                 |          |
| 42 |                                  |                                             |            |                                                                                                                           |                                                                                                                                                                                                                                                                                                                                                                                                                                                 |          |
| 43 |                                  |                                             |            |                                                                                                                           |                                                                                                                                                                                                                                                                                                                                                                                                                                                 |          |
| 44 |                                  |                                             |            |                                                                                                                           |                                                                                                                                                                                                                                                                                                                                                                                                                                                 |          |
| 45 |                                  |                                             |            |                                                                                                                           |                                                                                                                                                                                                                                                                                                                                                                                                                                                 |          |
| 46 |                                  |                                             |            |                                                                                                                           |                                                                                                                                                                                                                                                                                                                                                                                                                                                 |          |
| 47 |                                  |                                             |            |                                                                                                                           |                                                                                                                                                                                                                                                                                                                                                                                                                                                 |          |
| 48 |                                  |                                             |            |                                                                                                                           |                                                                                                                                                                                                                                                                                                                                                                                                                                                 |          |
| 49 |                                  |                                             |            |                                                                                                                           |                                                                                                                                                                                                                                                                                                                                                                                                                                                 |          |
| 50 |                                  |                                             |            |                                                                                                                           |                                                                                                                                                                                                                                                                                                                                                                                                                                                 |          |
| 51 |                                  |                                             |            |                                                                                                                           |                                                                                                                                                                                                                                                                                                                                                                                                                                                 |          |
| 52 |                                  |                                             |            |                                                                                                                           |                                                                                                                                                                                                                                                                                                                                                                                                                                                 |          |
| 53 |                                  |                                             |            |                                                                                                                           |                                                                                                                                                                                                                                                                                                                                                                                                                                                 |          |
| 54 |                                  |                                             |            |                                                                                                                           |                                                                                                                                                                                                                                                                                                                                                                                                                                                 |          |
| 55 |                                  |                                             |            |                                                                                                                           |                                                                                                                                                                                                                                                                                                                                                                                                                                                 |          |
| 56 |                                  |                                             |            |                                                                                                                           |                                                                                                                                                                                                                                                                                                                                                                                                                                                 |          |
| 57 |                                  |                                             |            |                                                                                                                           |                                                                                                                                                                                                                                                                                                                                                                                                                                                 |          |
| 58 |                                  |                                             |            |                                                                                                                           |                                                                                                                                                                                                                                                                                                                                                                                                                                                 |          |
| 59 |                                  |                                             |            |                                                                                                                           |                                                                                                                                                                                                                                                                                                                                                                                                                                                 |          |
| 60 |                                  |                                             |            |                                                                                                                           |                                                                                                                                                                                                                                                                                                                                                                                                                                                 |          |

|    |                                                  |               |          |                        |                     |          |                                                      |  |
|----|--------------------------------------------------|---------------|----------|------------------------|---------------------|----------|------------------------------------------------------|--|
| 1  |                                                  |               |          |                        |                     |          |                                                      |  |
| 2  |                                                  |               |          |                        |                     |          |                                                      |  |
| 3  |                                                  |               |          |                        |                     |          |                                                      |  |
| 4  | Tan, et al,                                      | Prospective   | New      | TD and F2F consults    | F2F: Diagnostic     | High     |                                                      |  |
| 5  | 2010                                             | Cohort Study, | Zealand, | by the same            | agreement rate      |          |                                                      |  |
| 6  |                                                  | Repeated      | Y        | dermatologist via      | (73.7%, N=681),     |          |                                                      |  |
| 7  |                                                  | measures      |          | digital photography    | accuracy (Sn, Sp,   |          |                                                      |  |
| 8  |                                                  |               |          |                        | PPV)**              |          |                                                      |  |
| 9  | <b>Standards of reference: Histopathology</b>    |               |          |                        |                     |          |                                                      |  |
| 10 | Borve, et al,                                    | Prospective   | Sweden,  | TD and F2F consults    | F2F: Diagnostic     | High     |                                                      |  |
| 11 | 2013                                             | Cohort Study  | Y        | by the same            | agreement rate (TD1 |          |                                                      |  |
| 12 |                                                  |               |          | dermatologist via      | 55%, TD2 57%),      |          |                                                      |  |
| 13 |                                                  |               |          | smartphone and         | concordance (TD1    |          |                                                      |  |
| 14 |                                                  |               |          | dermoscopy images      | 0.47, TD2 0.48),    |          |                                                      |  |
| 15 |                                                  |               |          | stored in iDoc 24 app  | accuracy (TD1 51%,  |          |                                                      |  |
| 16 |                                                  |               |          |                        | TD2 61%)            |          |                                                      |  |
| 17 |                                                  |               |          |                        | Histo: Concordance  |          | Skin cancer lesions only                             |  |
| 18 |                                                  |               |          |                        | (TD1 0.51, TD2      |          |                                                      |  |
| 19 |                                                  |               |          |                        | 0.51), N=69         |          |                                                      |  |
| 20 | Clarke, et al,                                   | Prospective   | USA,     | TD and F2F             | F2F: Diagnostic     | High     |                                                      |  |
| 21 | 2021                                             | Cohort Study  | Y        | dermatologists via     | agreement rate      |          |                                                      |  |
| 22 |                                                  |               |          | clinical images taken  | (66.6%),            |          |                                                      |  |
| 23 |                                                  |               |          | by digital photography | concordance (0.6),  |          |                                                      |  |
| 24 |                                                  |               |          | stored in Research     | N=308               |          |                                                      |  |
| 25 |                                                  |               |          | Electronic Data        | Histo: Diagnostic   |          |                                                      |  |
| 26 |                                                  |               |          | Capture                | agreement rate      |          |                                                      |  |
| 27 | Goulart-                                         | Prospective   | Brazil,  | TD and F2F             | F2F: Concordance    | High     |                                                      |  |
| 28 | Silveira et                                      | Cohort Study  | N        | dermatologists via     | (0.958), accuracy   |          |                                                      |  |
| 29 | al, 2019                                         |               |          | smartphone images      | (Sn, Sp, PPV, NPV)  |          |                                                      |  |
| 30 |                                                  |               |          | acquired and stored    | Histo: Concordance  |          |                                                      |  |
| 31 |                                                  |               |          | via Telederma app      | (0.556), N=39       |          |                                                      |  |
| 32 | <b>Standards of reference: No clear standard</b> |               |          |                        |                     |          |                                                      |  |
| 33 | Altieri, et al,                                  | Prospective   | USA,     | TD and F2F             | Diagnostic          | Low      |                                                      |  |
| 34 | 2017                                             | Cohort Study  | Y        | dermatologists via     | agreement rate (TD1 |          |                                                      |  |
| 35 |                                                  |               |          | clinical images taken  | 58.1%, N=160; TD2   |          |                                                      |  |
| 36 |                                                  |               |          | by digital photography | 53.3%, N=152; TD3   |          |                                                      |  |
| 37 |                                                  |               |          |                        | 52.6%, N=152),      |          |                                                      |  |
| 38 |                                                  |               |          |                        | concordance (TD1    |          |                                                      |  |
| 39 |                                                  |               |          |                        | 0.51, N=160; TD2    |          |                                                      |  |
| 40 |                                                  |               |          |                        | 0.51, N=152; TD3    |          |                                                      |  |
| 41 |                                                  |               |          |                        | 0.57, N=152)        |          |                                                      |  |
| 42 | Barbieri, et                                     | Prospective   | USA,     | TD and F2F             | Diagnostic          | Moderate |                                                      |  |
| 43 | al, 2014                                         | Cohort Study  | N        | dermatologists via     | agreement rate (TD1 |          |                                                      |  |
| 44 |                                                  |               |          | smartphone images      | 64%, TD2 56%),      |          |                                                      |  |
| 45 |                                                  |               |          | using the AccessDerm   | N=50                |          |                                                      |  |
| 46 |                                                  |               |          | smartphone platform    |                     |          |                                                      |  |
| 47 | Gabel, et al,                                    | Prospective   | USA      | TD and F2F             | Diagnostic          | High     |                                                      |  |
| 48 | 2021                                             | Cohort Study  | Y        | dermatologists via     | agreement rate      |          |                                                      |  |
| 49 |                                                  |               |          | clinical images taken  | (66.7%),            |          |                                                      |  |
| 50 |                                                  |               |          | by digital photography | concordance (0.33), |          |                                                      |  |
| 51 |                                                  |               |          | and tablets            | N=41                |          |                                                      |  |
| 52 | Tran, et al,                                     | Prospective   | Egypt,   | TD and F2F             | Diagnostic          | High     |                                                      |  |
| 53 | 2011                                             | Cohort Study  | Y        | dermatologists via     | agreement rate      |          |                                                      |  |
| 54 |                                                  |               |          | smartphone images      | (75%, N=30)         |          |                                                      |  |
| 55 |                                                  |               |          | stored in ClickDoc     |                     |          |                                                      |  |
| 56 |                                                  |               |          |                        |                     |          | Skin cancer, and other common dermatological lesions |  |
| 57 |                                                  |               |          |                        |                     |          |                                                      |  |
| 58 |                                                  |               |          |                        |                     |          |                                                      |  |
| 59 |                                                  |               |          |                        |                     |          |                                                      |  |
| 60 |                                                  |               |          |                        |                     |          |                                                      |  |

|                                                                                                                                                                                                                                                                                                                                                                                                                                                                                                                                                                                                                                                                                                                              |                                            |        |                                                                                                  |                                             |      |             |
|------------------------------------------------------------------------------------------------------------------------------------------------------------------------------------------------------------------------------------------------------------------------------------------------------------------------------------------------------------------------------------------------------------------------------------------------------------------------------------------------------------------------------------------------------------------------------------------------------------------------------------------------------------------------------------------------------------------------------|--------------------------------------------|--------|--------------------------------------------------------------------------------------------------|---------------------------------------------|------|-------------|
| Carter, et al, 2017                                                                                                                                                                                                                                                                                                                                                                                                                                                                                                                                                                                                                                                                                                          | Prospective and retrospective cohort study | USA, Y | TD and F2F dermatologists, as well as F2F PCP via clinical images stored using Epic EHR software | Derm vs TD: Diagnostic agreement rate (38%) | High | Skin cancer |
| <p>*A1 (non-biopsied pigmented lesions, Macro<br/>                 A2 (non-biopsied pigmented lesions, Macro+PLD)<br/>                 A3 (non-biopsied pigmented lesions, Macro+PLD)<br/>                 B1 (biopsied pigmented lesions, Macro)<br/>                 B2 (biopsied pigmented lesions, Macro+PLD)<br/>                 B3 (biopsied pigmented lesions, Macro+PLD)<br/>                 C1 (non-biopsied non-pigmented lesions, Macro)<br/>                 C2 (non-biopsied non-pigmented lesions,, Macro+PLD)<br/>                 D1 (biopsied non-pigmented lesions, Macro)<br/>                 D2 (biopsied non-pigmented lesions, Macro+PLD)<br/>                 PLD = polarized light dermoscopy</p> |                                            |        |                                                                                                  |                                             |      |             |

**B**

| Source                       | Study design                       | Country of publ., Study reported funding (Y/N) | Intervention Assessment of diagnostic agreement between...                                    | Outcomes Comparing complete primary diagnostic agreement between F2F and TD (and between Histo and TD if applicable) | Quality rating |                                  |
|------------------------------|------------------------------------|------------------------------------------------|-----------------------------------------------------------------------------------------------|----------------------------------------------------------------------------------------------------------------------|----------------|----------------------------------|
| Costello, et al, 2019        | Prospective Cross-sectional study  | USA, Y                                         | TD and F2F PCP via smartphone and dermoscopy images using the Photo Exam app                  | Diagnostic agreement rate (31.6%, N=37)                                                                              | High           | Skin cancer and other dermatoses |
| Duong, et al, 2014           | Observational study                | France, Y                                      | TD and F2F emergency physicians via smartphone images and videoconferences                    | Videoconference: diagnostic agreement rate (68.7%, N=83)<br>SFTD: diagnostic agreement rate (30.9%, N=110)           | High           |                                  |
| Gonzalez-Coloma, et al, 2019 | Prospective, Cross-sectional study | Chile, N                                       | TD and F2F PCP via clinical images                                                            | Diagnostic concordance (0.50, N=326)                                                                                 | High           |                                  |
| Keller, et al, 2020          | Prospective Cohort Study           | USA, Y                                         | TD and F2F dermatologists or hospitalists on clinical images taken by smartphones and tablets | ED vs TD: Diagnostic agreement rate (45.3%), concordance (0.4), N=53                                                 | Low            |                                  |
| Muir, et al, 2011            | Prospective Cohort Study           | Australia, N                                   | TD and F2F emergency physicians via clinical images taken by digital photography              | ED vs TD: Diagnostic agreement rate (72%),                                                                           | High           |                                  |

|                      |                                            |                |                                                                                                  |                                                  | concordance<br>(0.42), N=60 |                                   |
|----------------------|--------------------------------------------|----------------|--------------------------------------------------------------------------------------------------|--------------------------------------------------|-----------------------------|-----------------------------------|
| Carter, et al, 2017  | Prospective and retrospective cohort study | USA, Y         | TD and F2F dermatologists, as well as F2F PCP via clinical images stored using Epic EHR software | PCP vs TD: Diagnostic agreement rate (14%), N=79 | High                        | Skin cancer lesions only          |
| Jones, et al, 2021   | Retrospective Cohort Study                 | New Zealand, Y | TD and F2F PCP via digital photography and dermoscopy images                                     | PCP vs TD (SSC Matched*)                         | Moderate                    |                                   |
| Piccoli, et al, 2015 | Retrospective Cross-sectional study        | Brazil, Y      | TD and F2F PCP via digital photography and dermoscopy images                                     | Diagnostic concordance (0.69, N=184), accuracy   |                             |                                   |
| Chen, et al, 2010    | Retrospective Cohort Study                 | USA, Y         | TD and F2F PCP via clinical images stored in Second Opinion Software                             | Diagnostic agreement rate (48%, N=405)           | High                        | Skin lesions other than melanomas |
| Patro, et al 2015    | Prospective Cohort Study                   | India, Y       | TD and F2F PCP via digital photography                                                           | Diagnostic agreement rate (56%, N=206)           | High                        |                                   |

\*A1 (non-biopsied pigmented lesions, Macro)  
 A2 (non-biopsied pigmented lesions, Macro+PLD)  
 A3 (non-biopsied pigmented lesions, Macro+PLD)  
 B1 (biopsied pigmented lesions, Macro)  
 B2 (biopsied pigmented lesions, Macro+PLD)  
 B3 (biopsied pigmented lesions, Macro+PLD)  
 C1 (non-biopsied non-pigmented lesions, Macro)  
 C2 (non-biopsied non-pigmented lesions,, Macro+PLD)  
 D1 (biopsied non-pigmented lesions, Macro)  
 D2 (biopsied non-pigmented lesions, Macro+PLD)  
 PLD = polarized light dermoscopy

\*Suspected Skin Cancer Pathway matched for age, sex, and ethnicity.

**Table 1. Study characteristics for all included studies. (A)** Studies that compared TD with F2F dermatologists. **(B)** Studies that compared TD with F2F non-specialists. Studies are in alphabetical order and are grouped according to lesion type reported.

| Source                                               | Patient demographics                                                                                                   | Special inclusions, and exclusions |
|------------------------------------------------------|------------------------------------------------------------------------------------------------------------------------|------------------------------------|
|                                                      | Country where patients resided, number of patients included, percentage by gender/sex, age, number of lesions included |                                    |
| Skin cancer, and other common dermatological lesions |                                                                                                                        |                                    |
| Altieri, et al, 2017                                 | USA, 232 p., sex N/A, age: 18+, 232 I.                                                                                 | Inclusion: Adults                  |
| Azfar, et al, 2014                                   | Botswana, 76 p., 57% female, 43% male, mean age: 39, 159 I.                                                            | Inclusion: HIV+ adults             |

|    |                              |                                                                                                                                       |                                                                                 |
|----|------------------------------|---------------------------------------------------------------------------------------------------------------------------------------|---------------------------------------------------------------------------------|
| 1  | Barbieri, et al, 2014        | USA, 50 p., 64% female, 36% male, mean age: 55.2, 50 l.                                                                               | Inclusion: Adults                                                               |
| 2  | Barcaui, et al, 2018         | Brazil, 31 p., 71% female, 29% male, mean age: 56.5, 41 l.                                                                            | Inclusion: Adults with pigmented lesions only                                   |
| 3  | Batalla, 2015                | Spain, 183 p., 66% female, 34% male, mean age: 9, 65 l.                                                                               | Inclusion: Pediatric patients                                                   |
| 4  | Borve, et al, 2012           | Sweden, 40 p., 57.5% female, 42.5% male, mean age: 49, 40 l.                                                                          | Inclusion: Adults                                                               |
| 5  | Costello, et al, 2019        | USA, 37 p., 65% female, 35% male, mean age: 47.9, 37 l.                                                                               | Inclusion: Adults who were under or uninsured                                   |
| 6  | Duong, et al, 2014           | France, 111 p. SFTD, 83 p. videoconference, sex N/A, age: 18+, 110 l. SFTD, 68 l. videoconference                                     | Inclusion: Adults presenting to emergency department                            |
| 7  | Gabel, et al, 2021           | USA, 41 p. sex N/A, age N/A, 41 l.                                                                                                    | N/A                                                                             |
| 8  | Gatica, et al, 2015          | Chile, 125 p., 57.6% female, 42.4% male, mean age: 37.7, 125 l.                                                                       |                                                                                 |
| 9  | Gerhardt, et al, 2021        | USA, 809 p., sex N/A, age N/A, 809 l.                                                                                                 | Inclusion: Veteran population; Exclusion: Patients whose lesions resolved early |
| 10 | Gonzalez-Coloma, et al, 2019 | Chile, 326 p., 59% female, 41% male, mean age: 35.8, 326 l.                                                                           | N/A                                                                             |
| 11 | Keller, et al, 2020          | USA, 100 p., 43.2% female, 56.8% male, age N/A, 100 l.                                                                                | N/A                                                                             |
| 12 | Marchell, et al, 2017        | USA, 216 p., sex N/A, age N/A, 216 l.                                                                                                 | N/A                                                                             |
| 13 | Muir, et al, 2011            | Australia, 60 p. where F2F was an ED physician, 50 p. where F2F was a dermatologist, 65% female, 35% male, mean age: 47, 60 and 50 l. | Inclusion: Adults; Exclusion: Lesions caused by accident or trauma              |
| 14 | Nami, et al, 2015            | Italy and Austria, 391 p., 52.2% female, 47.8% male, mean age: 54, 391 l.                                                             | Exclusion: Pigmented skin lesions                                               |
| 15 | Okita, et al, 2016           | Brazil, 100 p., sex N/A, age N/A, 100 l.                                                                                              | N/A                                                                             |
| 16 | Ribas, et al, 2010           | Brazil, 174 p., 53.4% female, 46.6% male, mean age: 34.7, 174 l.                                                                      |                                                                                 |
| 17 | Rios-Yuil, 2011              | Panama, 30 p., 63.3% female, 36.7% male, age range for 30% of patients: 50-59, 30 l.                                                  |                                                                                 |
| 18 | Romero Aguilera, et al, 2014 | Spain, 457 p., 56% female, 44% male, mean age: 36, 170 l.                                                                             |                                                                                 |
| 19 | Romero, et al, 2010          | Spain, 158 p. SFTD with videoconference, 170 p. SFTD only, 56% female, 44% male, mean age: 36, 510 l.                                 |                                                                                 |
| 20 | Rubegni, et al, 2011         | Italy, 130 p., 53.9% female, 46.1% male, mean age: 80.6, 130 l.                                                                       | Inclusion: Geriatric patients                                                   |
| 21 | Saleh, et al, 2017           | Egypt, 600 p., 50.7% female, 49.3% male, age: 38% >20, 17.3% >10-20, 31.7% 2-10, 13% <2; 600 l.                                       | N/A                                                                             |
| 22 | Tran, et al, 2011            | Egypt, 30 p., sex N/A, all ages, 30 l.                                                                                                | N/A                                                                             |



|    |                                               |                                                                                          |                                                                                                                            |
|----|-----------------------------------------------|------------------------------------------------------------------------------------------|----------------------------------------------------------------------------------------------------------------------------|
| 1  |                                               |                                                                                          |                                                                                                                            |
| 2  |                                               |                                                                                          |                                                                                                                            |
| 3  | Vano-Galvan, et al, 2010                      | Spain, 100 p. (50 from derm outpatient clinic, 50 from the ED), sex N/A, age N/A, 100 I. | N/A                                                                                                                        |
| 4  |                                               |                                                                                          |                                                                                                                            |
| 5  | Zanini, 2013                                  | Brazil, 100 p., sex N/A, age N/A, 100 I.                                                 |                                                                                                                            |
| 6  |                                               |                                                                                          |                                                                                                                            |
| 7  | Zink, et al, 2017, July                       | Germany, 195 p., 20.5% female, 79.5% male, age range: 1-89 years, 195 I.                 |                                                                                                                            |
| 8  |                                               |                                                                                          |                                                                                                                            |
| 9  |                                               |                                                                                          |                                                                                                                            |
| 10 | <b>Skin cancer lesions only</b>               |                                                                                          |                                                                                                                            |
| 11 | Borve, et al, 2013                            | Sweden, 62 p., 38.7% female, 60.3% male, mean age: 64, 69 I.                             | Inclusion: Adults whose lesions could be biopsied                                                                          |
| 12 |                                               |                                                                                          |                                                                                                                            |
| 13 |                                               |                                                                                          |                                                                                                                            |
| 14 | Carter, et al, 2017                           | USA, 79 patients, 74% female, 26% male, mean age: 47, 79 I.                              | Inclusion: Adults with mild-to-moderate cases; Exclusion: Patients with melanocytic lesions or emergencies                 |
| 15 |                                               |                                                                                          |                                                                                                                            |
| 16 |                                               |                                                                                          |                                                                                                                            |
| 17 |                                               |                                                                                          |                                                                                                                            |
| 18 | Clarke, et al, 2021                           | USA, 206 p., 49.5% female, 50.5% male, mean age: 56.9, 308 I.                            | Inclusion: Adults with a lesion of concern reported by anyone (e.g., patient, family, referring GP) except a dermatologist |
| 19 |                                               |                                                                                          |                                                                                                                            |
| 20 |                                               |                                                                                          |                                                                                                                            |
| 21 |                                               |                                                                                          |                                                                                                                            |
| 22 | Giavina-Bianchi, et al, 2020 Nov              | Brazil, 17, 233 p., 71.4% female, 28.6% male, age N/A, 803 I.                            | Exclusions: Mild/complex cases, diagnoses without ICD10 code, and only looked at the 10 most frequent neoplasms            |
| 23 |                                               |                                                                                          |                                                                                                                            |
| 24 |                                               |                                                                                          |                                                                                                                            |
| 25 |                                               |                                                                                          |                                                                                                                            |
| 26 | Goulart-Silveira et al, 2019                  | Brazil, 39 p., 69% female, 31% male, mean age: 68, 39 I.                                 | Inclusion: Adults; Exclusion: Patients with bad quality images                                                             |
| 27 |                                               |                                                                                          |                                                                                                                            |
| 28 | Jones, et al, 2021                            | New Zealand, 481 p., 64% female, 36% male, age range: 0-90+, 528 I.                      | Inclusion: Adults and children with suspected skin cancers.                                                                |
| 29 |                                               |                                                                                          |                                                                                                                            |
| 30 | Lamel, et al, 2012                            | USA, 86 p., 58.1% female, 41.9% male, mean age: 45.2, 107 I.                             | N/A                                                                                                                        |
| 31 |                                               |                                                                                          |                                                                                                                            |
| 32 | Piccoli, et al, 2015                          | Brazil, 184 p., 73.4% female, 26.6% male, mean age: 54.7, 184 I.                         | Exclusions: Patients with poorly taken images, patients under concurrent treatment                                         |
| 33 |                                               |                                                                                          |                                                                                                                            |
| 34 |                                               |                                                                                          |                                                                                                                            |
| 35 | Senel, et al, 2013                            | Turkey, 150 p., 49% female, 51% male, mean age: 55, 150 I.                               | Inclusion: Adults with non-melanocytic lesions only                                                                        |
| 36 |                                               |                                                                                          |                                                                                                                            |
| 37 | Tan, et al, 2010                              | New Zealand, 200 p., 63% female, 37% male, age range: 11-94, 491 I.                      | N/A                                                                                                                        |
| 38 |                                               |                                                                                          |                                                                                                                            |
| 39 |                                               |                                                                                          |                                                                                                                            |
| 40 | Vestergaard, et al, 2020                      | Denmark, 519 p., 57% female, 42% male, mean age: 55, 600 I.                              | Inclusion: Adults                                                                                                          |
| 41 |                                               |                                                                                          |                                                                                                                            |
| 42 | Warshaw, et al, 2015                          | USA, 2,152 p., 3.2% female, 96.8% male, mean age: 68, 3021 I.                            | Inclusion: Adults                                                                                                          |
| 43 |                                               |                                                                                          |                                                                                                                            |
| 44 | Zink, et al, 2017, Sept                       | Germany, 26 p., sex N/A, age N/A, 26 I.                                                  |                                                                                                                            |
| 45 |                                               |                                                                                          |                                                                                                                            |
| 46 | Sola-Ortigosa, et al, 2020                    | Spain, 636 p., 43.2% female, 56.8% male, mean age: 72.8, 1000 I.                         | Inclusion: Adults with keratotic skin lesions only; Exclusion: Patients with poorly taken images                           |
| 47 |                                               |                                                                                          |                                                                                                                            |
| 48 |                                               |                                                                                          |                                                                                                                            |
| 49 |                                               |                                                                                          |                                                                                                                            |
| 50 | <b>Skin lesions other than skin neoplasms</b> |                                                                                          |                                                                                                                            |
| 51 | Chen, et al, 2010                             | USA, 405 p., 50.6% female, 49.4% male, mean age: 5.9, 405 I.                             | Inclusion: 12 or younger; Exclusion: Lesions caused by an accident or trauma                                               |
| 52 |                                               |                                                                                          |                                                                                                                            |
| 53 |                                               |                                                                                          |                                                                                                                            |
| 54 |                                               |                                                                                          |                                                                                                                            |
| 55 |                                               |                                                                                          |                                                                                                                            |
| 56 |                                               |                                                                                          |                                                                                                                            |
| 57 |                                               |                                                                                          |                                                                                                                            |
| 58 |                                               |                                                                                          |                                                                                                                            |
| 59 |                                               |                                                                                          |                                                                                                                            |
| 60 |                                               |                                                                                          |                                                                                                                            |

|                                  |                                                                |                                                                                                                               |
|----------------------------------|----------------------------------------------------------------|-------------------------------------------------------------------------------------------------------------------------------|
| Giavina-Bianchi, et al, 2020 Oct | Brazil, 24,210 p., 70% female, 30% male, age N/A, 739 I.       | Exclusions: Mild/complex cases, diagnoses without ICD10 code, and only looked at the 20 most frequent inflammatory dermatoses |
| Patro, et al 2015                | India, 206 p., 58.7% female, 41.3% male, age range: 1+, 206 I. | Exclusions: Pregnant women and patients with concurrent diseases                                                              |

**Table 2. patient characteristics for all 44 included studies.** Studies in alphabetical order and are grouped according to lesion type reported. Last column describes special inclusion and exclusion criteria that could impact quality of the studies included. NA or N/A: Not available, I.: lesion, SFTD: Store And Forward Technology, GP: General practitioner.

For peer review only

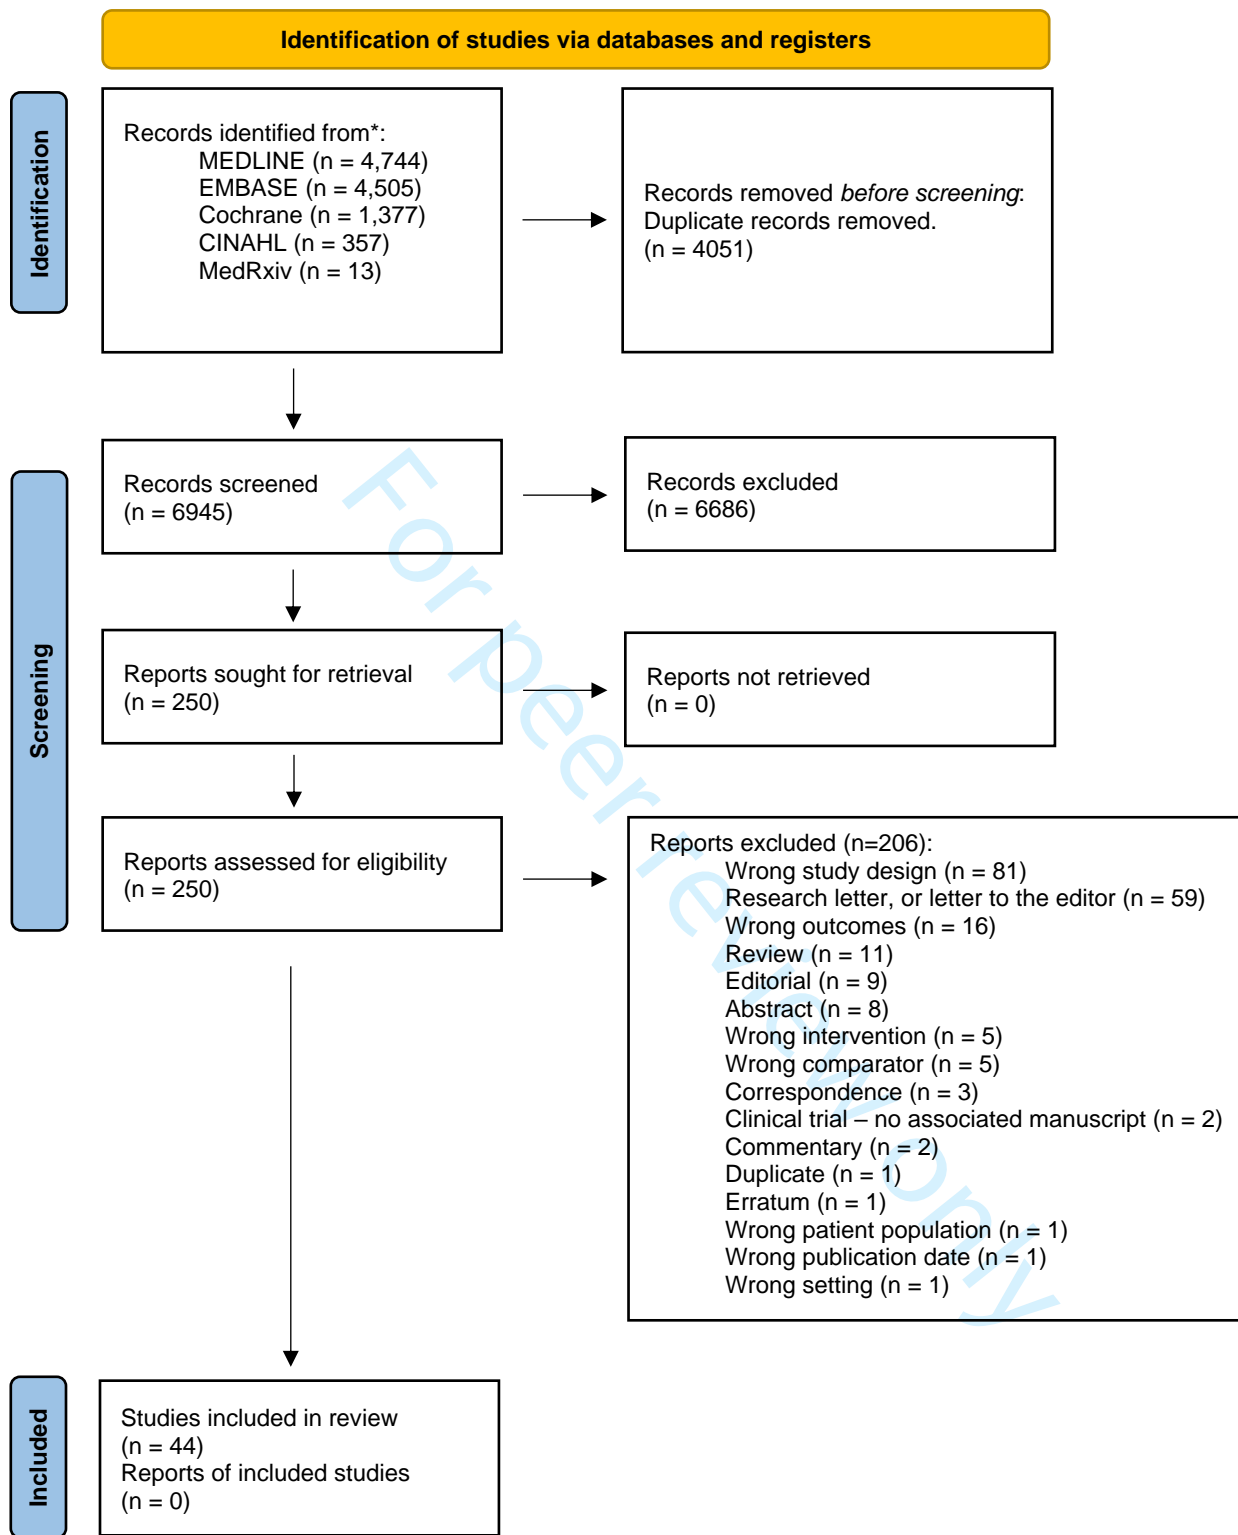

Figure 1. PRISMA Flow diagram of study selection.

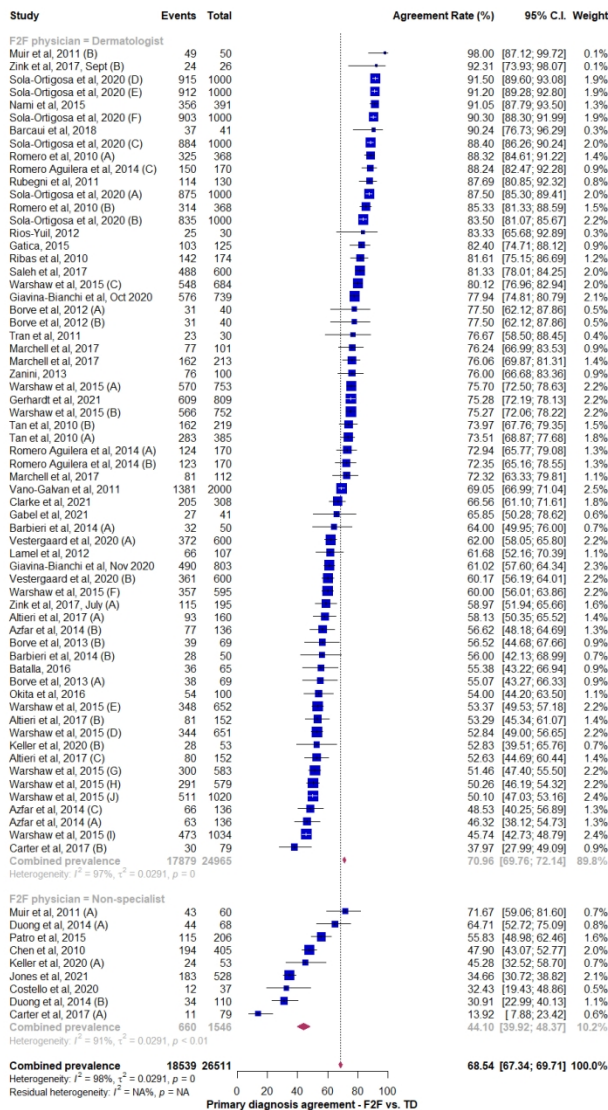

Figure 2. Forest plot representing F2F and TD primary diagnostic agreement by specialization status of the F2F physician. Studies were sorted into two groups, a) F2F diagnosis completed by a board-certified dermatologist; b) F2F diagnosis completed by a non-specialist (e.g., general practitioner). (A) Forest plot representing percentage agreement and 95% C.I. for overall concordance across 40 studies with a total of 72 unique number of comparisons, N of events and total included participants.

264x476mm (96 x 96 DPI)

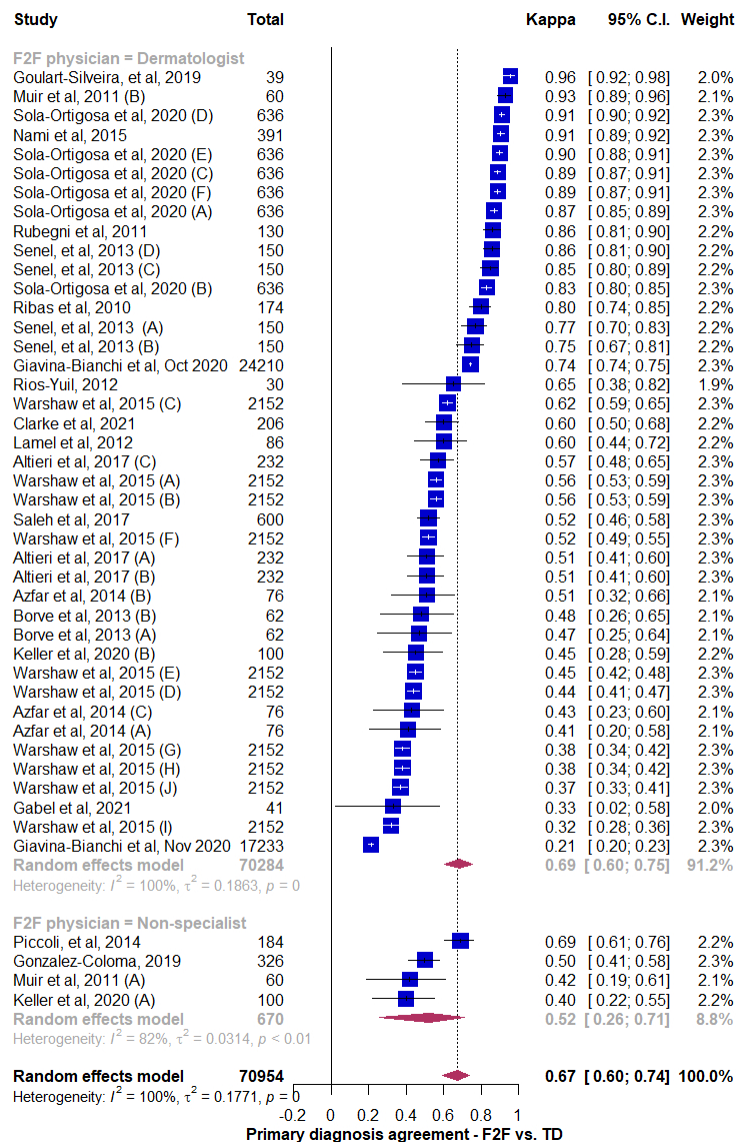

Figure 2. Forest plot representing F2F and TD primary diagnostic agreement by specialization status of the F2F physician. Studies were sorted into two groups, a) F2F diagnosis completed by a board-certified dermatologist; b) F2F diagnosis completed by a non-specialist (e.g., general practitioner). (B) Forest plot representing kappa concordance and 95% C.I. for overall concordance across 21 studies with a total of 45 unique number of comparisons, N of total included participants.

264x317mm (96 x 96 DPI)

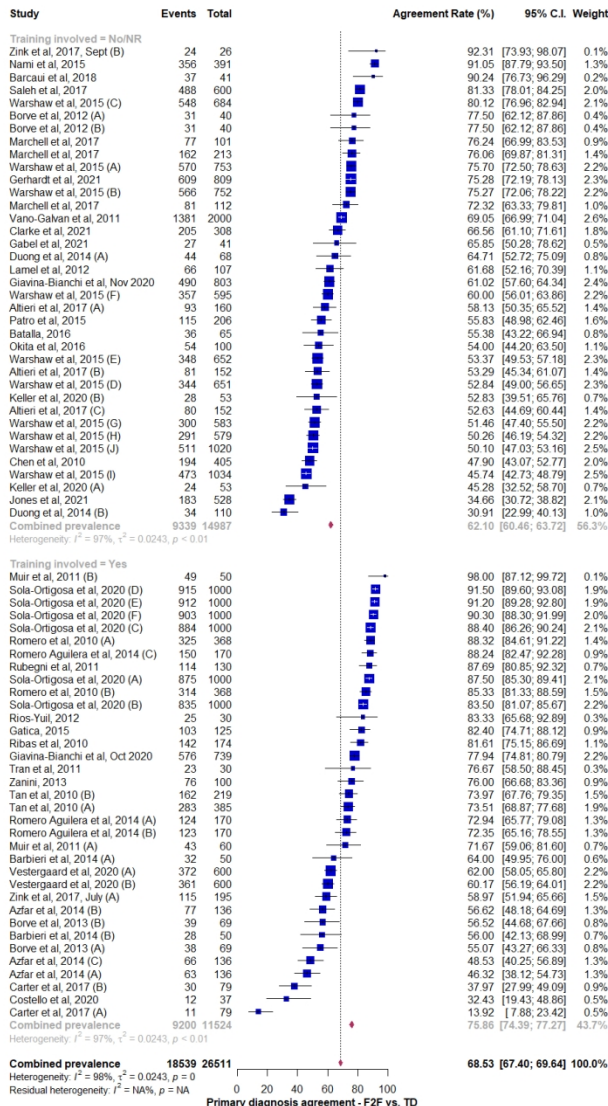

Figure 3. Forest plot representing F2F and TD primary diagnostic agreement by whether imaging acquisition training was indicated by the study.

Forest plot representing F2F and TD primary diagnostic agreement when image acquisition training is involved. Studies were sorted into two groups, a) Did not conduct or did not report training personnel on image acquisition; b) Stated that person in charge of image acquisition was trained. (A) Forest plot representing percentage agreement and 95% C.I. for overall concordance across 39 studies with a total of 71 unique number of comparisons, N of events and total included participants.

264x476mm (96 x 96 DPI)

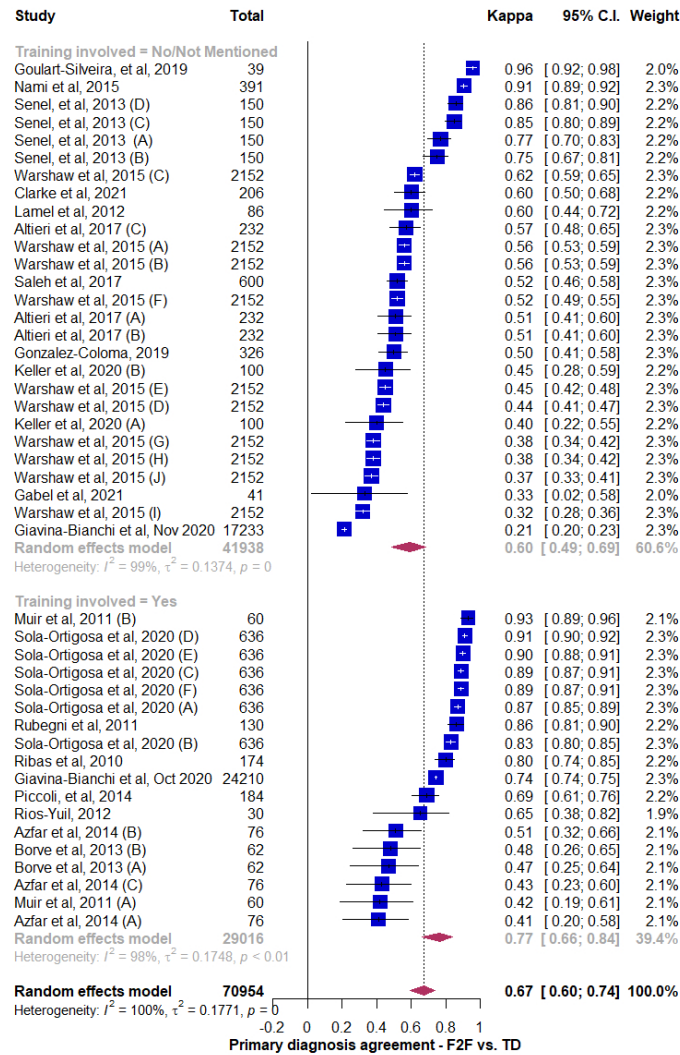

Figure 3. Forest plot representing F2F and TD primary diagnostic agreement by whether imaging acquisition training was indicated by the study.

Forest plot representing F2F and TD primary diagnostic agreement when image acquisition training is involved. Studies were sorted into two groups, a) Did not conduct or did not report training personnel on image acquisition; b) Stated that person in charge of image acquisition was trained. (B) Forest plot representing kappa concordance and 95% C.I. for overall concordance across 21 studies with a total of 45 unique number of comparisons, N of total included participants.

264x343mm (96 x 96 DPI)



## Supplementary Online Content

**Title:** Diagnostic Reliability in Teledermatology: A Systematic Review and Meta-Analysis

### Authors

Adrienn N. Bourkas\*<sup>1</sup> (MSc), Natasha Barone\*<sup>2</sup> (MSc), Matthew E.C. Bourkas<sup>3</sup> (PhD), Matthew Mannarino<sup>5</sup> (PhD), Robert D. J. Fraser<sup>4,6</sup> (RN, MN), Amy Lorincz<sup>4</sup> (MSc), Sheila C. Wang<sup>4,7</sup> (MD, PhD), Jose L. Ramirez-GarciaLuna<sup>4,5</sup> (MD, PhD)

\* Authors contributed equally

### Affiliations

<sup>1</sup>Faculty of Health Sciences, Queen's University School of Medicine, Kingston, Ontario, Canada

<sup>2</sup>Faculty of Medicine and Health Sciences, McGill University, Montreal, Quebec, Canada

<sup>3</sup>Temerty Faculty of Medicine, Department of Biochemistry, University of Toronto, Toronto, Ontario, Canada

<sup>4</sup>Swift Medical Inc., Toronto, Ontario, Canada

<sup>5</sup>Department of Surgery, McGill University, Montreal, Canada

<sup>6</sup>Arthur Labatt Family School of Nursing, Western University, London, Ontario Canada

<sup>7</sup>Department of Medicine, Division of Dermatology, McGill University Health Centre, Montreal, Quebec, Canada



## 21 Contents

|    |                                                                                                                                  |    |
|----|----------------------------------------------------------------------------------------------------------------------------------|----|
| 22 | Search Strategy                                                                                                                  | 3  |
| 23 | Ovid MEDLINE Search                                                                                                              | 3  |
| 24 | Supplementary eResults                                                                                                           | 4  |
| 25 | Diagnostic reliability of TD when compared to F2F (specialist and non-specialists) evaluation                                    | 4  |
| 26 | Diagnostic agreement between TD and TD, F2F and F2F, and TD and Histopathology                                                   | 4  |
| 27 | Subgroup analyses                                                                                                                | 4  |
| 28 | Diagnostic reliability of TD vs F2F by the inclusion of teledermoscopy in both TD and F2F assessments                            | 4  |
| 29 | Diagnostic reliability of TD vs F2F by type of technology used related to image acquisition                                      | 5  |
| 30 | Diagnostic reliability of TD vs F2F by pre- and post-pandemic timelines.                                                         | 5  |
| 31 | Risk of bias and quality assessment                                                                                              | 5  |
| 32 | Supplementary eFigures and Legends                                                                                               | 6  |
| 33 | eFigure 1. Forest plot representing F2F and TD primary diagnostic agreement.                                                     | 7  |
| 34 | eFigure 2. Forest plot representing TD, F2F, and histopathology primary diagnostic agreements.                                   | 8  |
| 35 | eFigure 3. Forest plot representing F2F and TD primary diagnostic agreement by utilization of teledermoscopy.                    | 10 |
| 36 |                                                                                                                                  |    |
| 37 | eFigure 4. Forest plot representing F2F and TD primary diagnostic agreement by skin lesion category.                             | 12 |
| 38 | eFigure 5. Forest plot representing F2F and TD primary diagnostic agreement by device type used to capture clinical photographs. | 14 |
| 39 |                                                                                                                                  |    |
| 40 | Supplementary eTables                                                                                                            | 15 |
| 41 | eTable 1. Inclusion and exclusion criteria for screening of literature search results.                                           | 15 |
| 42 | eTable 2. Data extraction form with details of domains record.                                                                   | 15 |
| 43 | eTable 3. Included unique study groupings and letter codes.                                                                      | 7  |
| 44 | eTable 4. List of studies excluded at the full-text screening stage.                                                             | 8  |
| 45 | eTable 5. Risk of Bias (ROB) results.                                                                                            | 10 |
| 46 | eReferences.                                                                                                                     | 11 |
| 47 |                                                                                                                                  |    |
| 48 |                                                                                                                                  |    |
| 49 |                                                                                                                                  |    |
| 50 |                                                                                                                                  |    |
| 51 |                                                                                                                                  |    |
| 52 |                                                                                                                                  |    |
| 53 |                                                                                                                                  |    |
| 54 |                                                                                                                                  |    |
| 55 |                                                                                                                                  |    |
| 56 |                                                                                                                                  |    |
| 57 |                                                                                                                                  |    |
| 58 |                                                                                                                                  |    |
| 59 |                                                                                                                                  |    |
| 60 |                                                                                                                                  |    |

## Supplementary eMethods

### Search Strategy

The search strategy was written for Ovid Medline and translated using each database's syntax, controlled vocabulary, and search fields. MeSH terms, Emtree terms, and free text words were used for TD and skin conditions such as melanoma and related synonyms. To identify additional articles not captured through the aforementioned search, a manual search was conducted via reference search of the included studies.

All database records were downloaded to EndNote X9 (Clarivate) and uploaded to web-based software for deduplication, screening, and full-text evaluation (Covidence; Veritas Health Innovation). We contacted three study authors to gain access to their published work.<sup>1-3</sup> The search strategy is available below.

### Ovid MEDLINE Search

Ovid MEDLINE(R), Ovid MEDLINE(R) Daily and Epub Ahead of Print, In-Process & Other Non-Indexed Citations <1946 to 2022 May 02>

1. e consult\*.mp. 2. econsult\*.mp. 3. electronic consult\*.mp. 4. e health.mp. 5. ehealth.mp. 6. e visit\*.mp. 7. evisit\*.mp. 8. home video visit\*.mp. 9. internet/ or internet-based intervention/ 10. internet.mp. 11. offsite care.mp. 12. off site care.mp. 13. ontario telemedicine network.mp. 14. Remote Consultation/ 15. remote consultation\*.mp. 16. remote visit\*.mp. 17. tele care.mp. 18. telecare.mp. 19. tele consult\*.mp. 20. teleconsult\*.mp. 21. tele diagnos\*.mp. 22. telehealth.mp. 23. tele health.mp. 24. telemedicine/ 25. telemedicine.mp. 26. tele medicine.mp. 27. telemonitor\*.mp. 28. tele monitor\*.mp. 29. Telepathology/ 30. telepatholog\*.mp. 31. tele patholog\*.mp. 32. telepractice\*.mp. 33. tele practice\*.mp. 34. Therapy, Computer-Assisted/ 35. video consult\*.mp. 36. videoconsult\*.mp. 37. virtual care.mp. 38. web based.mp. 39. Telepathology/ 40. or/1-39 41. Dermatology/ 42. dermatolog\*.mp. 43. dermatopatholog\*.mp. 44. exp Skin Diseases/di [Diagnosis] 45. exp Skin Neoplasms/ 46. skin.mp. 47. exp Skin Abnormalities/ 48. burns/ or burns, chemical/ or burns, electric/ or sunburn/ 49. burn\*.mp. 50. wound healing/ or cicatrix/ 51. wound\*.mp. 52. or/41-51, 53. 40 and 52, 54. teledermatolog\*.mp. 55. tele dermatolog\*.mp. 56. 54 or 55, 57. 53 or 56, 58. limit 57 to dt=20100101-20220402

### Eligibility Criteria

Inclusion and exclusion criteria are summarized in **eTable 1**.

### Data Selection and Extraction

Information extracted from full-text articles is summarized in **eTable 2**.

### Data Analysis: Cohen's kappa Interpretations

Cohen's kappa values for diagnostic concordance between TD and F2F physicians were interpreted based on the following criteria.<sup>4</sup> Values between 0–.20 indicate no agreement, .21–.39 minimal agreement, .40–.59 weak agreement, .60–.79 moderate agreement, .80–.90 strong agreement, and above .90 almost perfect agreement.

### Data Synthesis

Agreement rates and Cohen's kappa concordances for unique study groupings were treated as individual and independent values. A letter was assigned to each unique study grouping as explained in **eTable 3**. Confounding factors including technology type, year of publication, and training of study raters was controlled using meta-regression. Proportions meta-analysis looked at weighted averages and 95% confidence intervals were reported. A random-effects model as proposed by DerSimonian and Laird was chosen as the primary method to estimate all pooled estimates.<sup>5</sup> Heterogeneity was assessed by calculating I<sup>2</sup>. Possible sources of heterogeneity were sought through sub-group analysis. This included different skin conditions, specialization of the F2F physician, whether staff were trained on image acquisition, the technology used for image acquisition, the use of teledermoscopy, studies poster pre-or post-pandemic, and risk of bias.

## Supplementary eResults

### Diagnostic reliability of TD when compared to F2F (specialist and non-specialists) evaluation

Of the 40 studies that reported diagnostic agreement rates there were 72 unique comparisons made between F2F and TD.<sup>6-45</sup> **eFigure 1A** shows that the mean percentage agreement of 68.9% (CI 64.4%-73.1%) ranged from 14% to 98%, where 35/72 had percentage agreement above 70% and 7 studies had over 90% agreement. The studies were heterogeneous ( $I^2=98%$ ,  $p < 0$ ).

Of the 21 studies that reported concordance values, there were 45 unique comparisons made.<sup>6, 7, 12, 15, 18, 21-26, 29, 30, 33-35, 46-50</sup> **eFigure 1B** shows that the mean diagnostic concordance of 0.67 (CI 0.60 to 0.74) ranged from 0.213 (CI 0.20 to 0.23) to 0.96 (CI 0.92 to 0.98), with 21 studies (47%) having moderate agreement ( $k=0.6$  and above), and 13 (29%) studies having strong agreement. The studies were heterogeneous ( $I^2=100%$ ,  $p < 0.001$ ).

### Diagnostic agreement between TD and TD, F2F and F2F, and TD and Histopathology

Of the ten studies that reported diagnostic agreement rates between TDs, there were 17 unique comparisons made between F2F and TD. **eFigure 2A** shows that the mean percentage agreement of 76.4% (CI 69% to 82.5%) ranged from 37% to 91.5%, with 10/17 having percentage agreement above 70% and two studies having over 90% agreement. The studies were heterogeneous ( $I^2=97%$ ,  $p < 0.001$ ).

From four studies that reported diagnostic agreement rates between F2F dermatologists there were 6 unique comparisons. **eFigure 2B** shows that the mean percentage agreement 82.4% (CI 76.7%-87.0%) ranged from 75.5% to 91%. The studies were heterogeneous ( $I^2=68%$ ,  $p < 0.001$ ).

Five studies compared TDs to histopathology data, and there were six unique comparisons. **eFigure 2C** shows that the mean percentage agreement of 55.7% (CI 53% to 58.4%) ranged from 53.8% to 65.4%. The mean agreement rate between histopathology and TD was 55.7% (CI 53.0 to 58.4). The studies were homogeneous ( $I^2=0%$ ,  $p = 0.49$ ).

## Subgroup analyses

### Diagnostic reliability of TD vs F2F by the inclusion of teledermoscopy in both TD and F2F assessments

Overall, twelve studies with 22 unique comparisons used teledermoscopy for diagnosing suspicious lesions.<sup>9, 12, 16, 30, 33, 35, 39, 40, 43, 45</sup> **eFigure 3A** shows that with teledermoscopy, the mean diagnostic agreement rates was 69.1% (CI 66.8% to 71.4%), and this percentage ranged between from 31.6% to 92.3%. Without the use of teledermoscopy, the mean agreement rate was 68.3% (CI 66.8% to 69.8%). The means were not significantly different between the two groups and the studies were heterogeneous ( $I^2=97%$ ,  $p < 0.001$ ). **eFigure 3B** shows concordance values of seven studies that adapted teledermoscopy had a mean of 0.71 (CI 0.58 to 0.80).<sup>12, 30, 33, 35, 40, 48, 49</sup> Without teledermoscopy, the mean was 0.65 (CI 0.54 to 0.74). This difference was not statistically significant, and the studies were heterogeneous ( $I^2=100%$ ,  $p < 0.001$ ).

### Diagnostic reliability of TD vs F2F by the inclusion of lesion category

Twenty-six studies with 39 unique comparisons reporting percentage agreement rates that were inclusive to all lesion types as shown in **eFigure 4A**.<sup>6-11, 16-20, 23, 25-27, 29-34, 37, 38, 41, 42, 44</sup> The mean percentage agreement was 69.9% (CI 67.9% to 71.7%) and ranged from 30.9% to 98%, with the majority (26/39) having percentage agreement above 60% and 4 studies having over 90%. Eleven studies only looked at suspicious lesions<sup>12, 13, 15, 21, 24, 35, 36, 39, 40, 43, 45</sup>, and the mean percentage agreement was 68.1% (CI 66.3% to 69.8%). Three studies excluded skin cancers<sup>14, 22, 28</sup> and the mean percentage agreement was 62.2% (CI 56.2% to 67.8%). No statistical significance could be identified between the three lesion groups and the studies were heterogeneous ( $I^2=98%$ ,  $p < 0.001$ ).

Concordance values for studies inclusive to all lesions seen in **eFigure 4B** were reported in ten studies with a mean of 0.62 (CI 0.48 to 0.74).<sup>6, 7, 18, 23, 25, 26, 29, 30, 33, 34</sup> Six studies that looked at cancerous skin lesions only reported a mean of 0.70 (CI 0.59 to 0.78).<sup>12, 15, 21, 24, 35, 40</sup> Only one study that looked at all lesions except cancerous ones reported a concordance value.<sup>22</sup> No statistical significance could be identified between the three lesion groups and the studies were heterogeneous ( $I^2=100%$ ,  $p < 0.001$ ).

### 155 **Diagnostic reliability of TD vs F2F by type of technology used related to image acquisition**

156 Approximately half of the studies with 41 unique comparisons that compared TDs with F2F physicians used digital  
157 cameras for image acquisition. Eighteen studies comparing F2F and TD agreement rates with 26 unique  
158 comparisons reported the use of smartphones and tablets for image acquisition. **eFigure 5A** shows that the mean  
159 percentage agreement rate was 71.7% (CI 70.3% to 73.1%) for digital cameras compared to 59.8% (CI 57.2% to  
160 62.3%) for smartphones or tablets. The higher agreement rate with digital photography was statistically significant  
161 ( $p = 0.029$ , heterogeneity:  $I^2=98\%$ ).

162 Concordance values for digital photography were reported for twelve studies with a mean of 0.70 (CI 0.61 to 0.76)  
163 shown in **eFigure 5B**. Concordance values for smartphone or tablet technologies were reported for eight studies  
164 with a mean of 0.62 (CI 0.38 to 0.78). The higher concordance with digital photography was statistically significant  
165 ( $p = 0.003$ , heterogeneity:  $I^2=100\%$ )  
166

### 167 **Diagnostic reliability of TD vs F2F by pre- and post-pandemic timelines.**

168 When comparing TDs to all F2F physician, the average agreement rate was 65.5% (CI 64.0-66.9) for pre-pandemic  
169 studies, and 75.3% (CI 73.4% to 77.2%) for studies published after January 2020. When the percentage agreements  
170 were compared between the two groups, they were not statistically significant ( $p = 0.421$ ) and also heterogeneous  
171 ( $I^2=98\%$ ,  $p<0.001$ ). eTable not included.  
172

### 174 **Risk of bias and quality assessment**

175 The results of quality assessment for risk of bias and applicability in individual studies are displayed in. **eTable 4.**  
176 Five (11.4%) of the studies had low risk of bias, 11 (25%) had moderate risk, and 28 (63.6%) had high-risk of bias.  
177

178 There were no systematic differences between the results of studies that attempted to reduce risk of bias, compared  
179 with those with higher risk of bias. The mean diagnostic agreement rate between F2F and TD was 66.4% (CI 62.4%  
180 to 70.1%) for low risk, and 69.1% (CI 67.6% to 70.6%) for high risk ( $p = 0.932$ ). When the percentage agreements  
181 were compared between groups, they were heterogeneous ( $I^2=98\%$ ,  $p<0.001$ ). eTable not included.

182 **Supplementary eFigures and Legends**

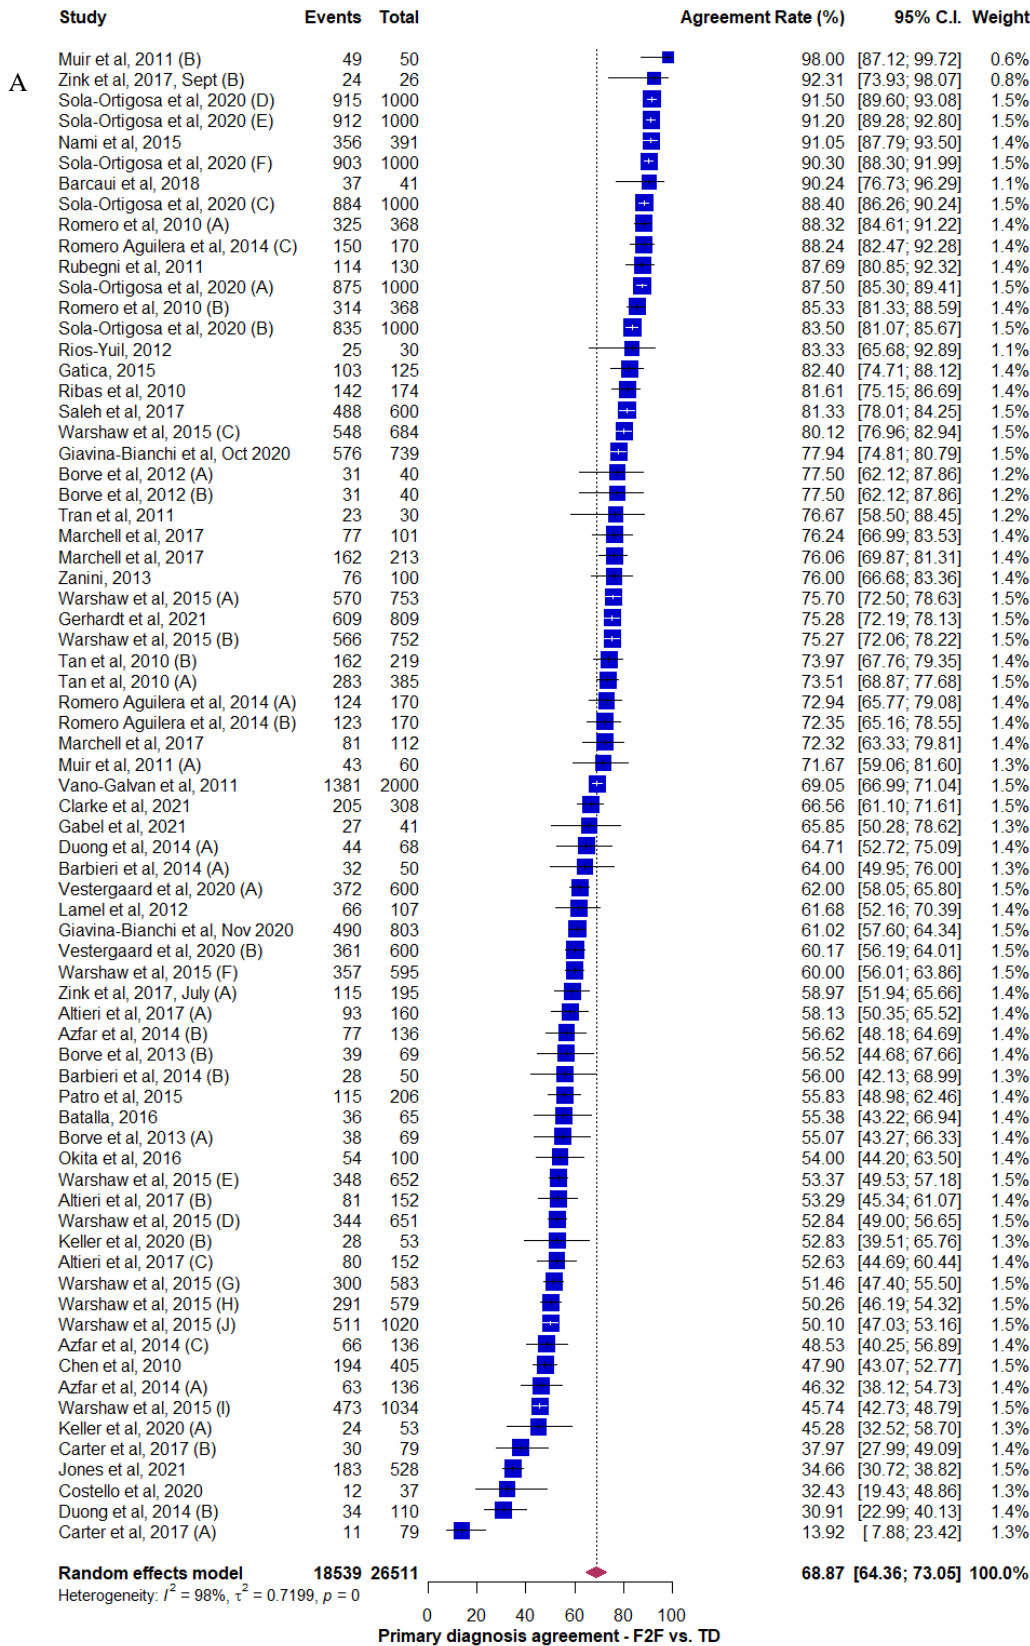

183



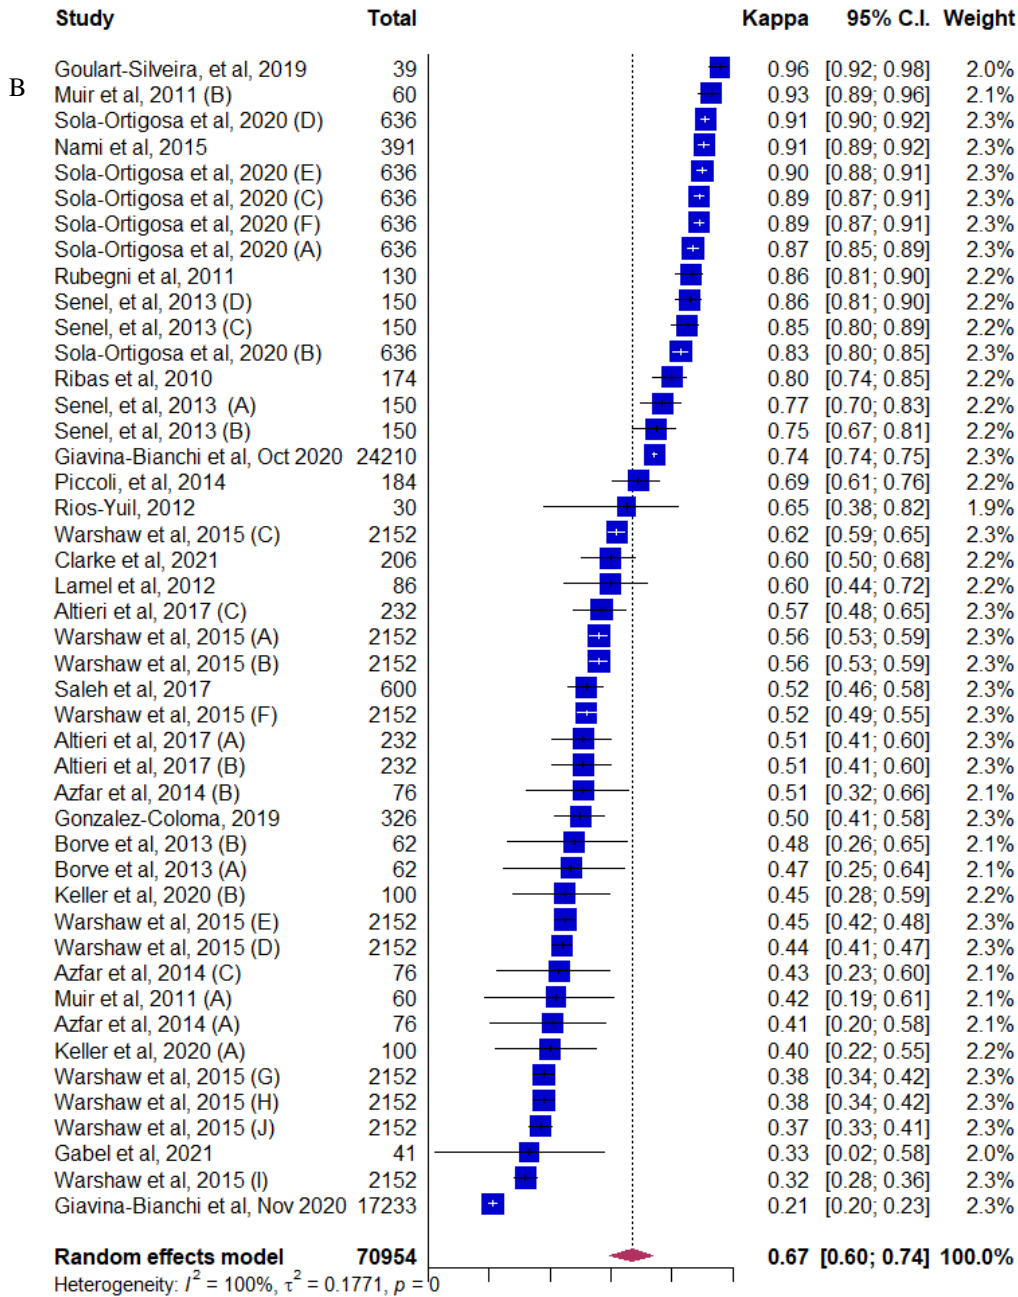

**eFigure 1. Forest plot representing F2F and TD primary diagnostic agreement.**

(A) Forest plot representing percentage agreement and 95% C.I. for overall concordance across 39 studies with a total of 71 unique number of comparisons, N of events and total included participants. (B) Forest plot representing kappa concordance and 95% C.I. for overall concordance across 21 studies with a total of 45 unique number of comparisons, N of total included participants.

1

2

3

4

5

6

7

8

9

10

11

12

13

14

15

16

17

18

19

20

21

191

22

23

24

25

26

27

28

29

30

31

32

192

33

34

35

36

37

38

39

40

41

42

43

44

45

46

47

48

49

50

51

52

53

54

55

56

57

58

59

60

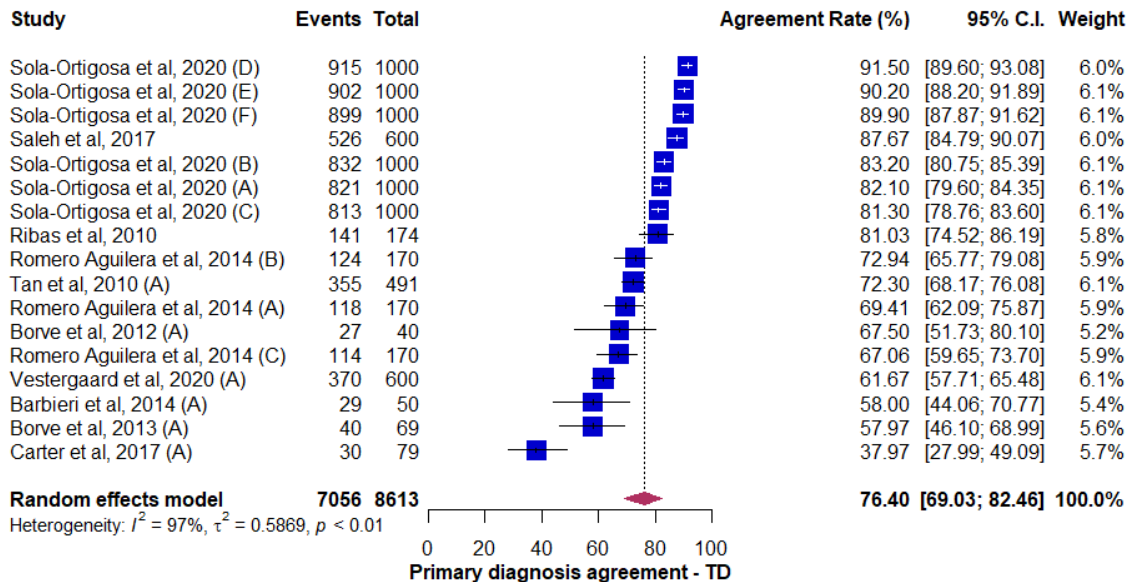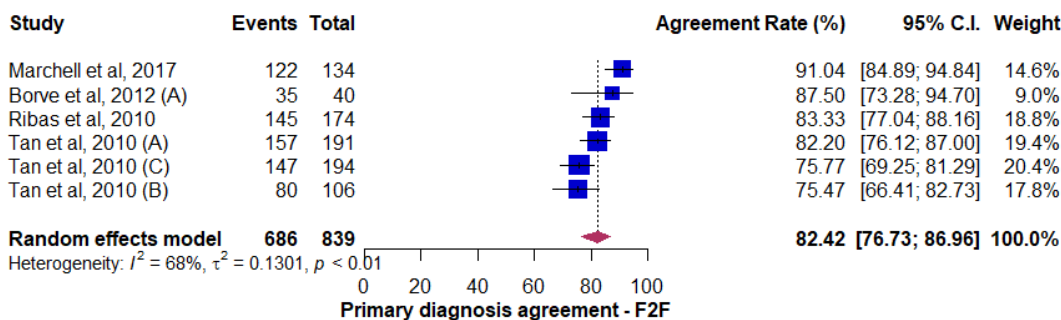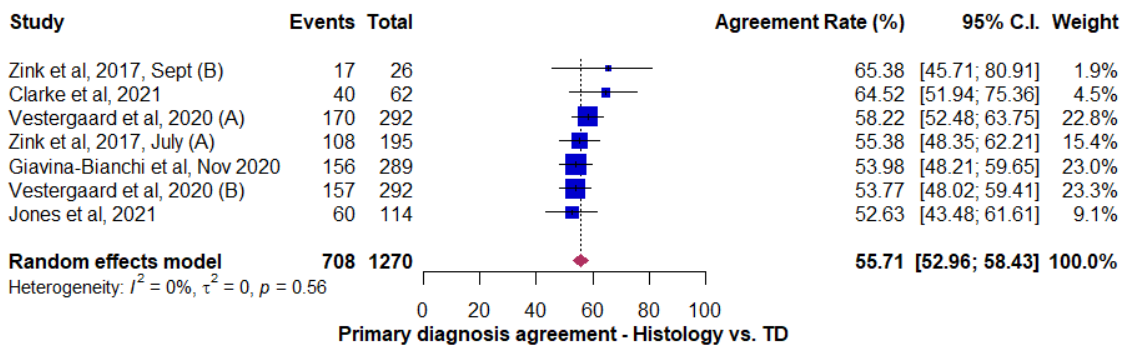

**eFigure 2. Forest plot representing TD, F2F, and histopathology primary diagnostic agreements.**

(A) Forest plot representing percentage agreement between TD and TD and 95% C.I. for overall concordance across 10 studies with a total of 17 unique number of comparisons, N of events and total included participants. (B) Forest plot representing kappa concordance and 95% C.I. for overall concordance between two F2F physician diagnoses across 4 studies with a total of 6 unique number of comparisons, N of total included participants. (C) Forest plot representing percentage agreement between TDs and histopathology with 95% C.I. for overall concordance across 6 studies, N of events and total included participants.

1  
2  
3  
4  
5  
6  
7  
8  
9  
10  
11  
12  
13  
14  
15  
16  
17  
18  
19  
20  
21  
22  
23  
24  
25  
26  
27  
28  
29  
30  
31  
32  
33  
34  
35  
36  
37  
38  
39  
40  
41  
42  
43  
44  
45  
46  
47  
48  
49  
50  
51  
52  
53  
54  
55  
56  
57  
58  
59  
60

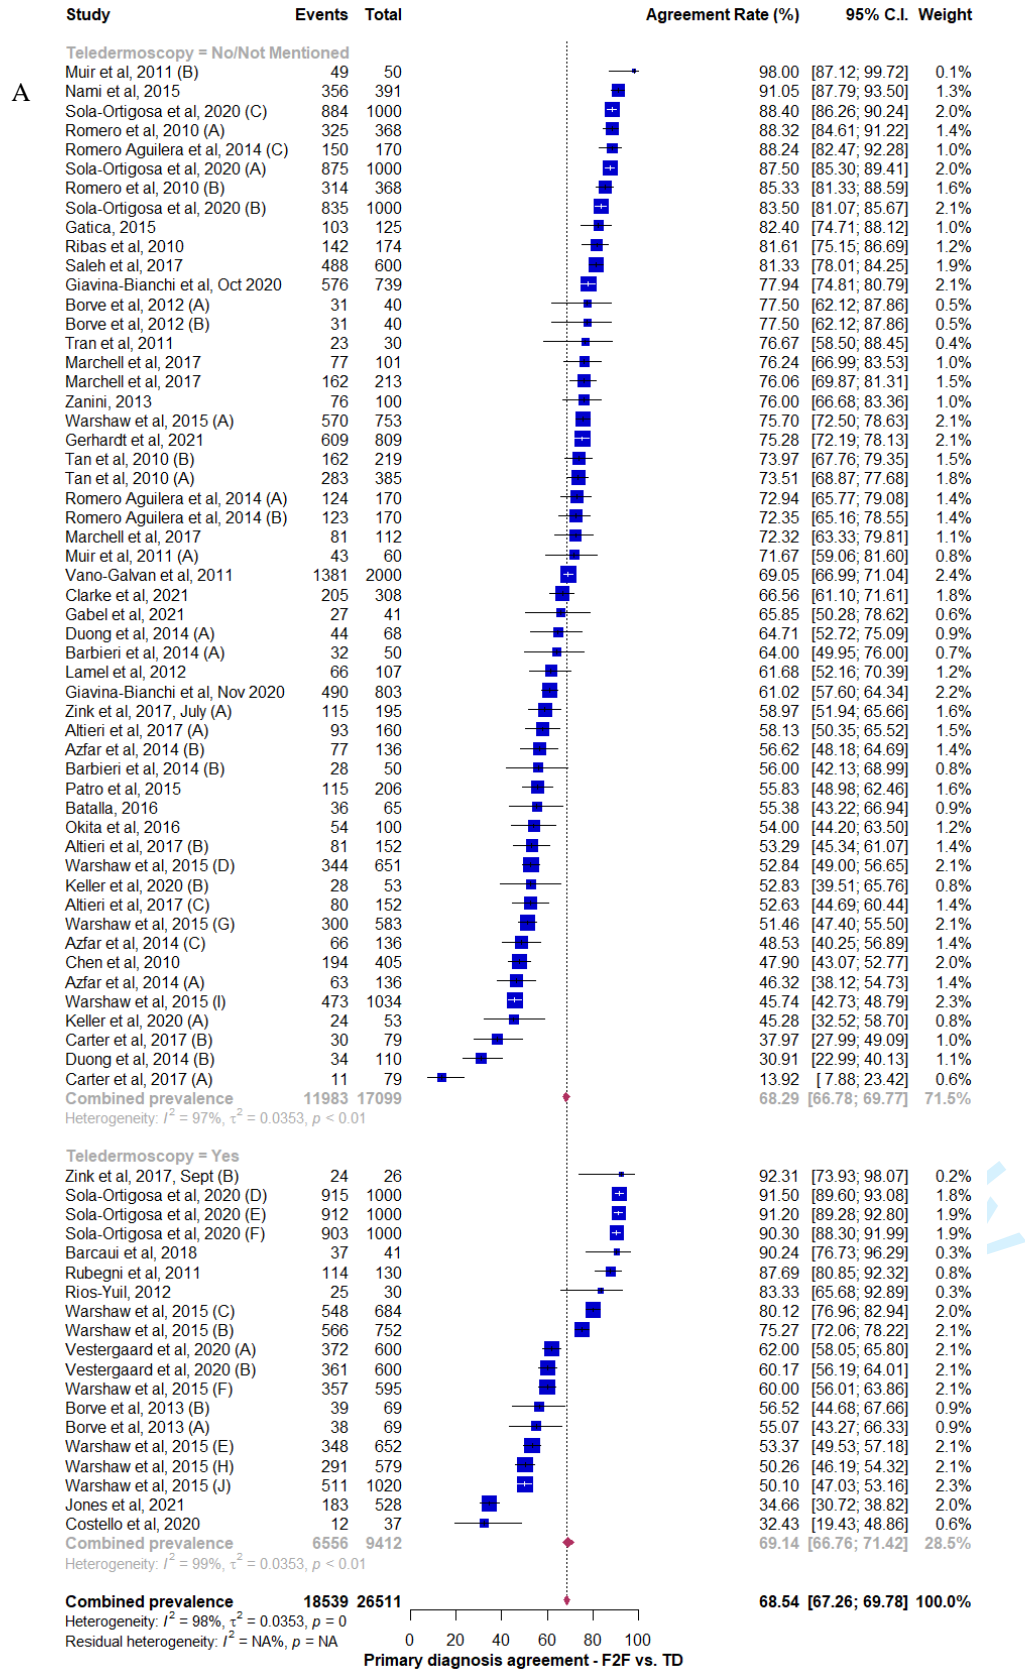

201



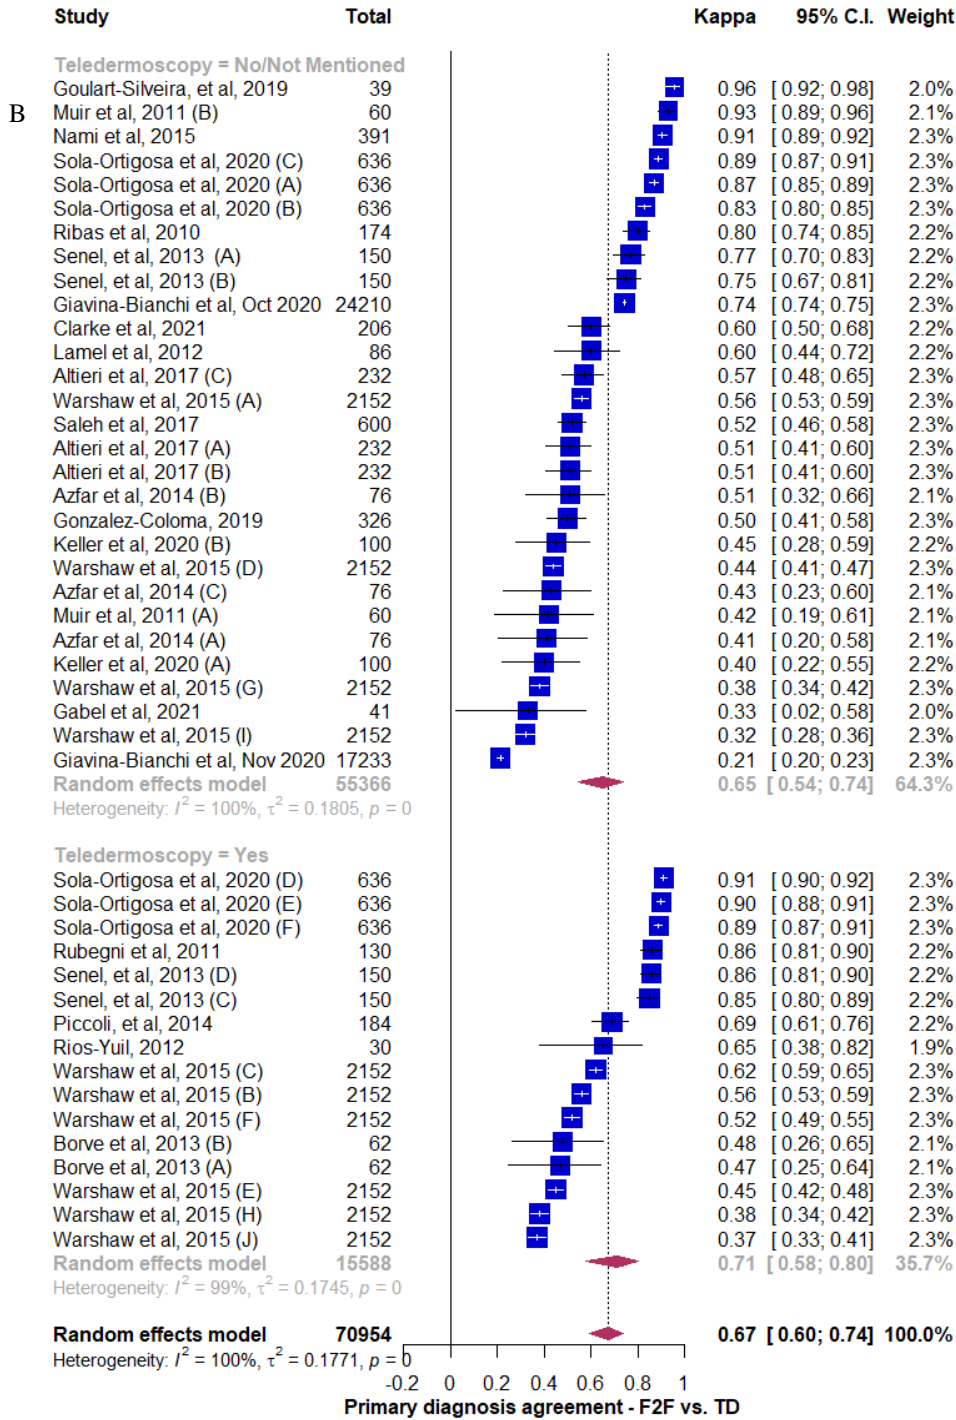

**eFigure 3. Forest plot representing F2F and TD primary diagnostic agreement by utilization of teledermoscopy.**

Studies were sorted into two groups, i) Did not use or did not report the use of teledermoscopy; ii) Used teledermoscopy. (A) Forest plot representing percentage agreement and 95% C.I. for overall concordance across 39 studies with a total of 71 unique number of comparisons, N of events and total included participants. (B) Forest plot representing kappa concordance and 95% C.I. for overall concordance across 21 studies with a total of 45 unique number of comparisons, N of total included participants.

1  
2  
3  
4  
5  
6  
7  
8  
9  
10  
11  
12  
13  
14  
15  
16  
17  
18  
19  
20  
21  
22  
23  
24  
25  
26  
27  
28  
29  
30  
31  
32  
33  
34  
35  
36  
37  
38  
39  
40  
41  
42  
43  
44  
45  
46  
47  
48  
49  
50  
51  
52  
53  
54  
55  
56  
57  
58  
59  
60

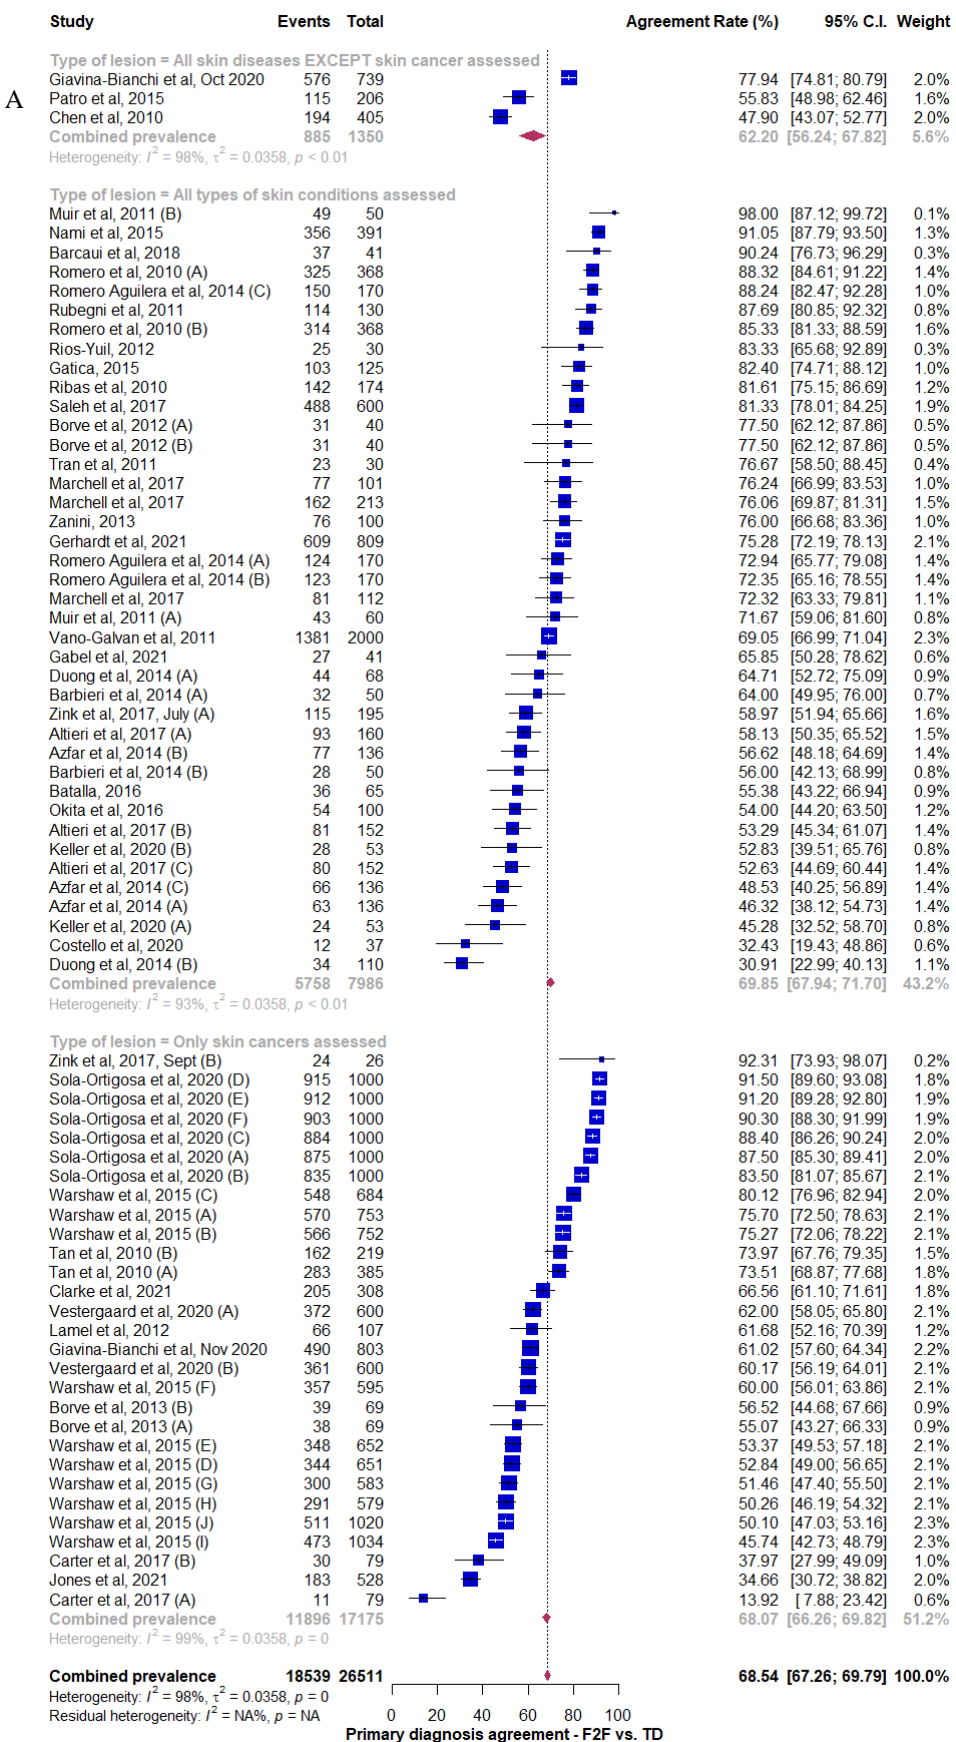

210

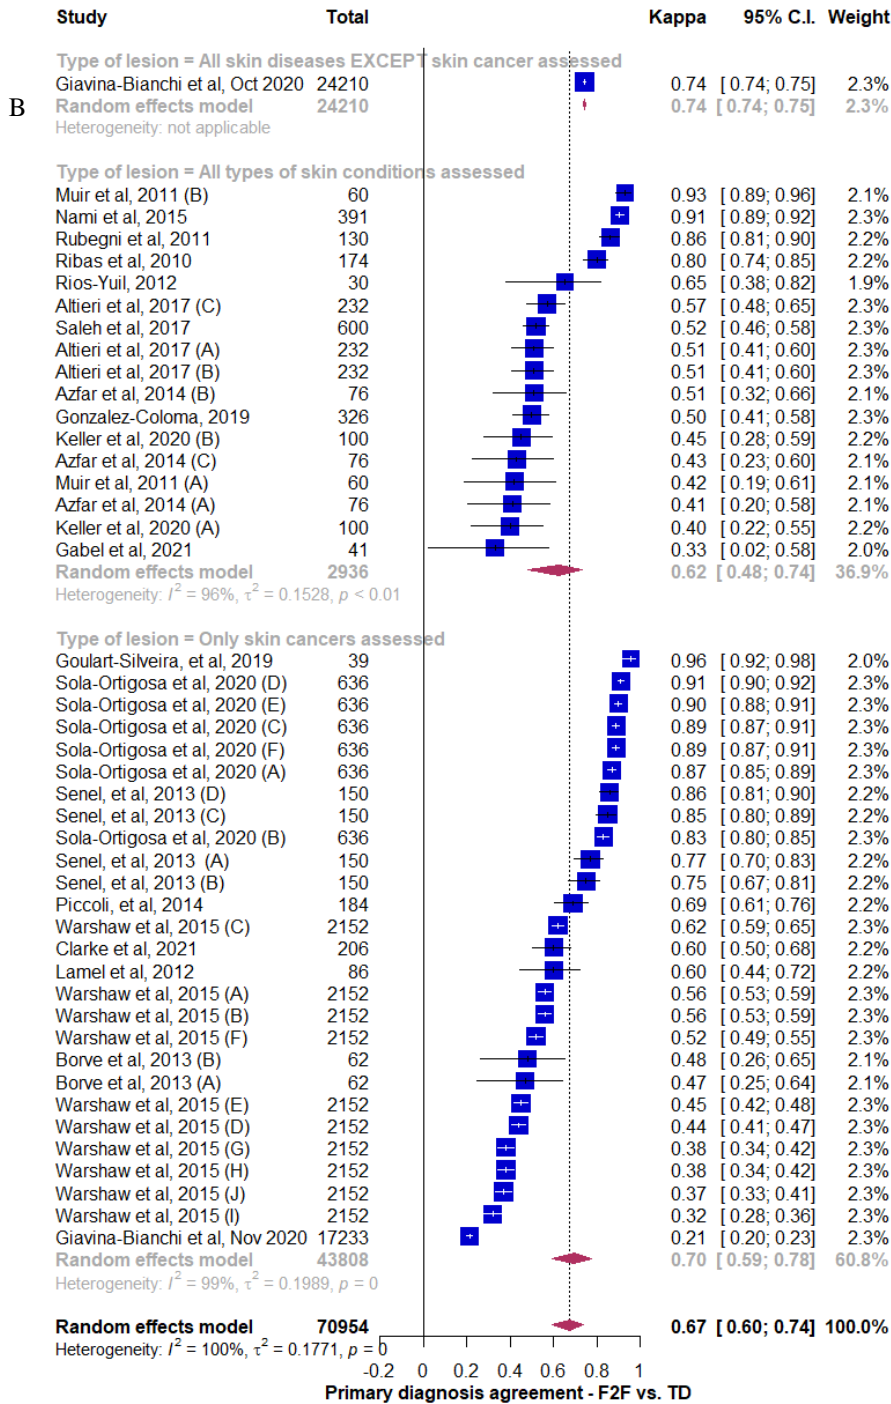

**eFigure 4. Forest plot representing F2F and TD primary diagnostic agreement by skin lesion category.** Studies were sorted into three groups according to the type of included lesions, i) All skin conditions except likely malignant lesion; ii) All skin conditions; iii) Likely malignant lesions only. (A) Forest plot representing percentage agreement and 95% C.I. for overall concordance across 39 studies with a total of 71 unique number of comparisons, N of events and total included participants. (B) Forest plot representing kappa concordance and 95% C.I. for overall concordance across 21 studies with a total of 45 unique number of comparisons, N of total included participants.

1  
2  
3  
4  
5  
6  
7  
8  
9  
10  
11  
12  
13  
14  
15  
16  
17  
18  
19  
20  
21  
22  
23  
24  
25  
26  
27  
28  
29  
30  
31  
32  
33  
34  
35  
36  
37  
38  
39  
40  
41  
42  
43  
44  
45  
46  
47  
48  
49  
50  
51  
52  
53  
54  
55  
56  
57  
58  
59  
60

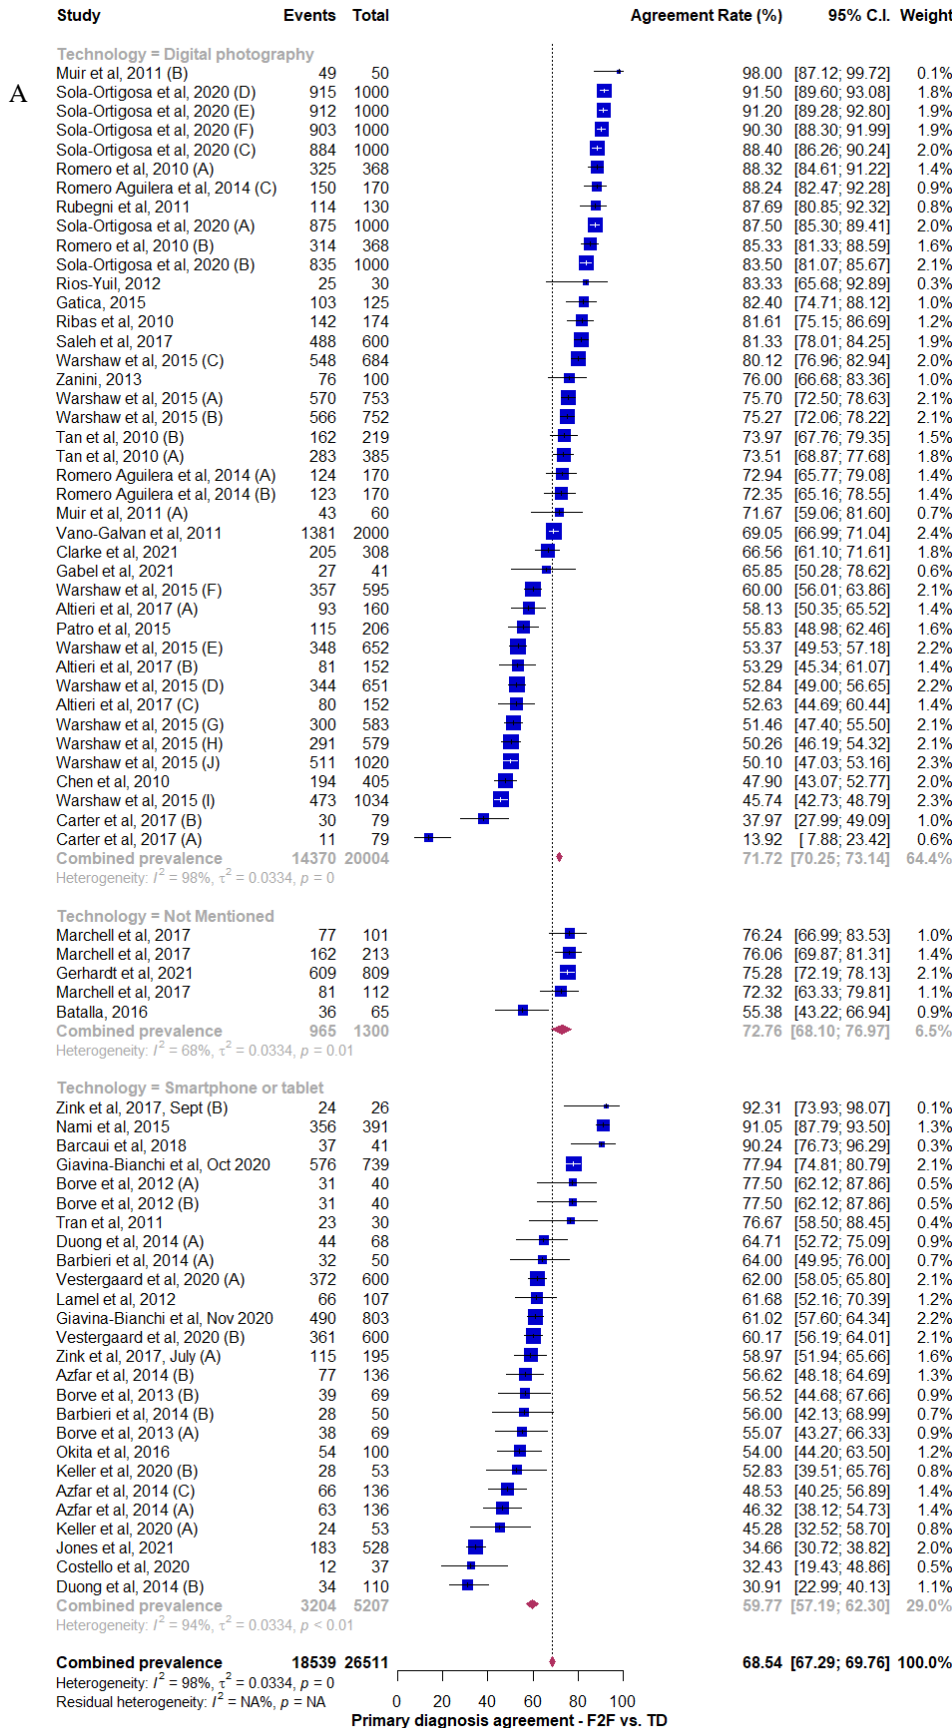

219



1  
2  
3  
4  
5  
6  
7  
8  
9  
10  
11  
12  
13  
14  
15  
16  
17  
18  
19  
20  
21  
22  
23  
24  
25  
26  
27  
28  
29  
30  
31  
32  
33  
34  
35  
36  
37  
38  
39  
40  
41  
42  
43  
44  
45  
46  
47  
48  
49  
50  
51  
52  
53  
54  
55  
56  
57  
58  
59  
60

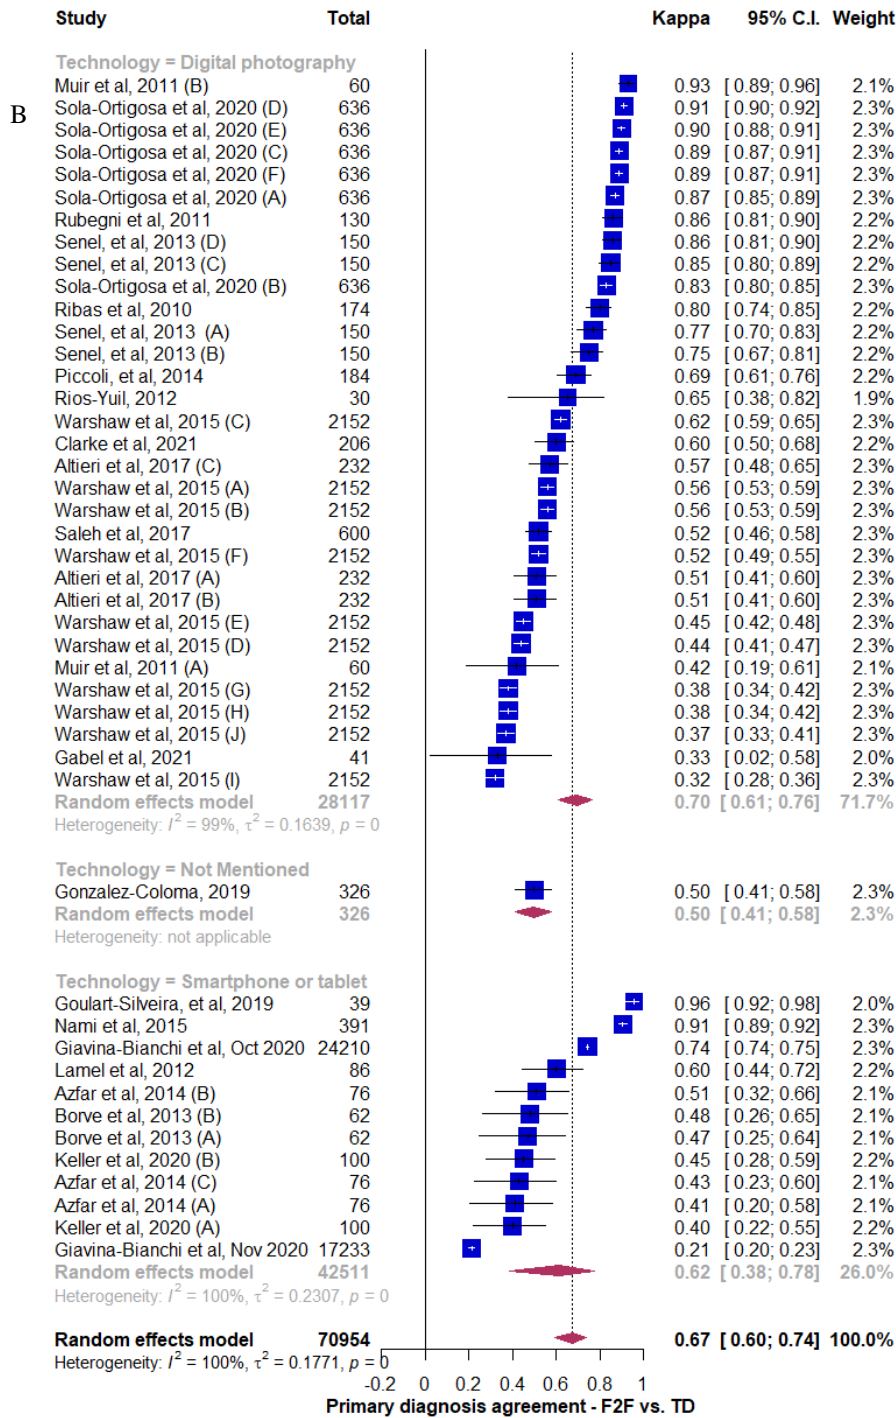

**eFigure 5. Forest plot representing F2F and TD primary diagnostic agreement by device type used to capture clinical photographs.**

Forest plot representing F2F and TD primary diagnostic agreement by imaging technology used. Studies were sorted into three groups, i) Digital photography ii) Imaging technology not mentioned iii) Smartphone or tablet. (A) Forest plot representing percentage agreement and 95% C.I. for overall concordance across 39 studies with a total of 71 unique number of comparisons, N of events and total included participants. (B) Forest plot representing kappa concordance and 95% C.I. for overall concordance across 21 studies with a total of 45 unique number of comparisons, N of total included participants.

Supplementary eTable Titles and Legends

230 **Supplementary eTables**

231

| Inclusion criteria                                                                                                                                                                   | Exclusion criteria                                                                                                                                                         |
|--------------------------------------------------------------------------------------------------------------------------------------------------------------------------------------|----------------------------------------------------------------------------------------------------------------------------------------------------------------------------|
| Primary articles assessing diagnostic agreement where store-and-forward technology or live video conference consults were compared with a control group who attend in-person visits. | Survey articles, feasibility studies, studies regarding other forms of telemedicine unrelated to dermatology, cost-effectiveness studies, editorials, and review articles. |
| Primarily comparing TD to F2F, sometimes using histopathology as the gold standard.                                                                                                  | Studies that clearly stated they used TDs as the gold- or reference standard.                                                                                              |
|                                                                                                                                                                                      | Studies that only compared dermatoscopic images in the absence of clinical images.                                                                                         |
|                                                                                                                                                                                      | Studies where patients captured their own photographs.                                                                                                                     |

232 **eTable 1. Inclusion and exclusion criteria for screening of literature search results.**

233 TD: TeleDermatology, TDs: TeleDermatologists, F2F: Face-to-Face.

234

235

236

**Study characteristics**

Author, year, title, study type, objective, country of publication. Patient characteristics: total number of participants included declaration of funding source, number of participants per study, mean age +/- SD, age range, gender, mean BMI and range, race/ethnicity, type of lesions evaluated, type of patients evaluated.

**Methodology - TD and F2F consults**

Method of correspondence, platform used for the TD consult, training on TD platform, length of TD and F2F consult, experience of the TD and F2F physician, location of TD, number of TDs and F2F physicians who made a diagnosis for each patient, total number of TDs and F2F physicians in study, order of visits, wait time between TD and F2F, whether same specialist conducted TD and F2F visit, specialization of the F2F physician, number of reviews; qualifications of the individual who acquired the clinical photographs and whether they received additional training on taking clinical photographs.

**Metrics and results**

Technology used for image acquisition and for viewing images with, distance between camera and lesion, number of images taken, use of teledermoscopy & dermoscopy, brand of dermatoscope, use of histopathology, referral content provided to TD, primary and differential diagnoses agreement and concordance rates, diagnostic accuracy values (if available) such as sensitivity, specificity, PPV and NPV.

237 **eTable 2. Data extraction form with details of domains record.**

238 TD: TeleDermatology, F2F: Face-to-Face, PPV: Positive Predictive Value, NPV: Negative Predictive Value.

1  
2  
3  
4  
5  
6  
7  
8  
9  
10  
11  
12  
13  
14  
15  
16  
17  
18  
19  
20  
21  
22  
23  
24  
25  
26  
27  
28  
29  
30  
31  
32  
33  
34  
35  
36  
37  
38  
39  
40  
41  
42  
43  
44  
45  
46  
47

| Author and Year          | Unique Study Grouping | n_participants | n_lesions | %_primary diagnosis agreement_in_person | N_primary diagnosis agreement_in_person | n_agreement | %_primary diagnosis agreement_TD | N_primary diagnosis agreement_TD | n_agreement | %_primary diagnosis agreement (TD and F2F) | N_primary diagnosis agreement (TD and F2F) | n_agreement | %_primary diagnosis agreement (TD & Histo) | N_primary diagnosis agreement (TD & Histo) | n_agreement | Inter_Kappa (primary diagnosis, TD and F2F) | N_Inter_Kappa (primary diagnosis, TD and F2F) | Inter_Kappa (primary diagnosis, TD and Histo) |
|--------------------------|-----------------------|----------------|-----------|-----------------------------------------|-----------------------------------------|-------------|----------------------------------|----------------------------------|-------------|--------------------------------------------|--------------------------------------------|-------------|--------------------------------------------|--------------------------------------------|-------------|---------------------------------------------|-----------------------------------------------|-----------------------------------------------|
| Altieri et al, 2017 (A)  | F2F Derm vs TD1       | 232            | 232       |                                         |                                         |             |                                  |                                  |             | 58                                         | 160                                        | 93          |                                            |                                            |             | 0.51                                        | 160                                           |                                               |
| Altieri et al, 2017 (B)  | F2F Derm vs TD2       | 232            | 232       |                                         |                                         |             |                                  |                                  |             | 53                                         | 152                                        | 81          |                                            |                                            |             | 0.51                                        | 152                                           |                                               |
| Altieri et al, 2017 (C)  | F2F Derm vs TD3       | 232            | 232       |                                         |                                         |             |                                  |                                  |             | 53                                         | 152                                        | 80          |                                            |                                            |             | 0.57                                        | 152                                           |                                               |
| Azfar et al, 2014 (A)    | F2F Derm vs TD1       | 76             | 159       |                                         |                                         |             |                                  |                                  | 40          | 47                                         | 136                                        | 63          |                                            |                                            |             | 0.41                                        | 136                                           |                                               |
| Azfar et al, 2014 (B)    | F2F Derm vs TD2       | 76             | 159       |                                         |                                         |             |                                  |                                  | 63          | 57                                         | 136                                        | 77          |                                            |                                            |             | 0.51                                        | 136                                           |                                               |
| Azfar et al, 2014 (C)    | F2F Derm vs TD3       | 76             | 159       |                                         |                                         |             |                                  |                                  | 59          | 49                                         | 136                                        | 66          |                                            |                                            |             | 0.43                                        | 136                                           |                                               |
| Barbieri et al, 2014 (A) | F2F Derm vs TD1       | 50             | 50        |                                         |                                         |             | 58                               | 50                               | 29          | 64                                         | 50                                         | 32          |                                            |                                            |             |                                             |                                               |                                               |
| Barbieri et al, 2014 (B) | F2F Derm vs TD2       | 50             | 50        |                                         |                                         |             |                                  |                                  |             | 56                                         | 50                                         | 28          |                                            |                                            |             |                                             |                                               |                                               |
| Barcaui et al, 2018      | F2F Derm vs TD        | 31             | 41        |                                         |                                         |             |                                  |                                  |             | 90                                         | 41                                         | 37          |                                            |                                            |             |                                             |                                               |                                               |
| Batalla, 2016            | F2F Derm vs TD        | 183            | 183       |                                         |                                         |             |                                  |                                  |             | 55                                         | 65                                         | 36          |                                            |                                            |             |                                             |                                               |                                               |

|    |                                 |                                           |       |       |    |    |    |    |    |    |    |     |     |    |      |     |      |     |     |
|----|---------------------------------|-------------------------------------------|-------|-------|----|----|----|----|----|----|----|-----|-----|----|------|-----|------|-----|-----|
| 1  | Borve et al, 2012 (A)           | F2F Derm vs TD1                           | 40    | 40    | 88 | 40 | 35 | 68 | 40 | 27 | 78 | 40  | 31  |    |      |     |      |     |     |
| 2  | Borve et al, 2012 (B)           | F2F Derm vs TD2                           | 40    | 40    |    |    |    |    |    |    | 78 | 40  | 31  |    |      |     |      |     |     |
| 3  | Borve et al, 2013 (A)           | F2F Derm vs TD1                           | 62    | 69    |    |    |    | 58 | 69 | 40 | 55 | 69  | 38  |    | 0.47 | 69  | .51  |     |     |
| 4  | Borve et al, 2013 (B)           | F2F Derm vs TD2                           | 62    | 69    |    |    |    |    |    |    | 57 | 69  | 39  |    | 0.48 | 69  |      |     |     |
| 5  | Carter et al, 2017 (A)          | F2F nonspecialist vs TD                   | 79    | 79    |    |    |    | 38 | 79 | 30 | 14 | 79  | 11  |    |      |     |      |     |     |
| 6  | Carter et al, 2017 (B)          | F2F Derm vs TD                            | 79    | 79    |    |    |    |    |    |    | 38 | 79  | 30  |    |      |     |      |     |     |
| 7  | Chen et al, 2010                | F2F nonspecialist vs TD                   | 405   | 405   |    |    |    |    |    |    | 48 | 405 | 194 |    |      |     |      |     |     |
| 8  | Clarke et al, 2021              | F2F Derm vs TD                            | 206   | 308   |    |    |    |    |    |    | 67 | 308 | 205 | 65 | 62   | 40  | 0.6  | 308 |     |
| 9  | Costello et al, 2020            | F2F nonspecialist vs TD                   | 37    | 37    |    |    |    |    |    |    | 32 | 37  | 12  |    |      |     |      |     |     |
| 10 | Duong et al, 2014 (A)           | F2F nonspecialist vs TD (Videoconference) | 111   | 110   |    |    |    |    |    |    | 65 | 68  | 44  |    |      |     |      |     |     |
| 11 | Duong et al, 2014 (B)           | F2F nonspecialist vs TD (SFTD)            | 111   | 110   |    |    |    |    |    |    | 31 | 110 | 34  |    |      |     |      |     |     |
| 12 | Gabel et al, 2021               | F2F Derm vs TD                            | 41    | 41    |    |    |    |    |    |    | 67 | 41  | 27  |    | 0.33 | 41  |      |     |     |
| 13 | Gatica, 2015                    | F2F Derm vs TD                            | 125   | 125   |    |    |    |    |    |    | 82 | 125 | 103 |    |      |     |      |     |     |
| 14 | Gerhardt et al, 2021            | F2F Derm vs TD                            | 809   | 809   |    |    |    |    |    |    | 75 | 809 | 609 |    |      |     |      |     |     |
| 15 | Giavina-Bianchi et al, Nov 2020 | F2F Derm vs TD                            | 17233 | 17233 |    |    |    |    |    |    | 61 | 803 | 490 | 54 | 289  | 156 | 0.21 | 803 | .09 |
| 16 | Giavina-Bianchi et al, Oct 2020 | F2F Derm vs TD                            | 24210 | 27519 |    |    |    |    |    |    | 78 | 739 | 576 |    | 0.74 | 739 |      |     |     |



1  
2  
3  
4  
5  
6  
7  
8  
9  
10  
11  
12  
13  
14  
15  
16  
17  
18  
19  
20  
21  
22  
23  
24  
25  
26  
27  
28  
29  
30  
31  
32  
33  
34  
35  
36  
37  
38  
39  
40  
41  
42  
43  
44  
45  
46  
47

|                               |                                                          |     |     |    |     |     |     |     |      |     |      |      |     |
|-------------------------------|----------------------------------------------------------|-----|-----|----|-----|-----|-----|-----|------|-----|------|------|-----|
| Gonzalez-Coloma, 2019         | F2F nonspecialist vs TD                                  | 326 | 326 |    |     |     |     |     |      |     | 0.5  | 326  |     |
| Goulart-Silveira, et al, 2019 | F2F Derm vs TD                                           | 39  | 39  |    |     |     |     |     |      |     | 0.96 | 39   | .56 |
| Jones et al, 2021             | F2F nonspecialist vs TD (Suspicious Skin Cancer pathway) | NA  | 528 |    |     | 35  | 528 | 183 | 53   | 114 | 60   |      |     |
| Keller et al, 2020 (A)        | F2F nonspecialist vs TD                                  | 100 | 100 |    |     | 45  | 53  | 24  |      |     |      | 0.4  | 53  |
| Keller et al, 2020 (B)        | F2F Derm vs TD                                           | 100 | 100 |    |     | 53  | 53  | 28  |      |     |      | 0.45 | 53  |
| Lamel et al, 2012             | F2F Derm vs TD                                           | 86  | 107 |    |     | 62  | 107 | 66  |      |     |      | 0.6  | 107 |
| Marchell et al, 2017          | F2F Derm vs TD (SFTD)                                    | 216 | 216 | 91 | 134 | 122 |     | 76  | 162  | 213 |      |      |     |
| Marchell et al, 2017          | F2F Derm vs TD (Uncompressed video)                      | 216 | 216 |    |     |     |     | 76  | 76.8 | 101 |      |      |     |
| Marchell et al, 2017          | F2F Derm vs TD (Compressed video)                        | 216 | 216 |    |     |     |     | 72  | 80.6 | 112 |      |      |     |
| Muir et al, 2011 (A)          | F2F nonspecialist vs TD                                  | 60  | 60  |    |     |     |     | 72  | 60   | 43  |      | 0.42 | 60  |
| Muir et al, 2011 (B)          | F2F Derm vs TD                                           | 60  | 60  |    |     |     |     | 98  | 50   | 49  |      | 0.93 | 50  |
| Nami et al, 2015              | F2F Derm vs TD                                           | 391 | 391 |    |     |     |     | 91  | 391  | 356 |      | 0.91 | 391 |
| Okita et al, 2016             | F2F Derm vs TD                                           | 100 | 100 |    |     |     |     | 54  | 100  | 54  |      |      |     |
| Patro et al, 2015             | F2F nonspecialist vs TD                                  | 206 | 206 |    |     |     |     | 56  | 206  | 115 |      |      |     |
| Piccoli, et al, 2014          | F2F nonspecialist vs TD                                  | 184 | 184 |    |     |     |     |     |      |     |      | 0.69 | 184 |

|    |                                 |                                             |     |      |    |     |     |      |     |     |      |     |           |      |      |    |
|----|---------------------------------|---------------------------------------------|-----|------|----|-----|-----|------|-----|-----|------|-----|-----------|------|------|----|
| 1  | Ribas et al, 2010               | F2F Derm vs TD                              | 174 | 174  | 83 | 174 | 145 | 81   | 174 | 141 | 82   | 174 | 142       | 0.8  | 174  |    |
| 2  | Rios-Yuil, 2012                 | F2F Derm vs TD                              | 30  | 30   |    |     |     |      |     |     | 83   | 30  | 25        | 67   | 0.65 | 30 |
| 3  | Romero Aguilera et al, 2014 (A) | F2F Derm vs TD1                             | 457 | 192  |    |     | 69  | 170  | 118 | 73  | 170  | 124 |           |      |      |    |
| 4  | Romero Aguilera et al, 2014 (B) | F2F Derm vs TD2                             | 457 | 192  |    |     | 73  | 170  | 124 | 72  | 170  | 123 |           |      |      |    |
| 5  | Romero Aguilera et al, 2014 (C) | F2F Derm vs TD3                             | 457 | 192  |    |     | 67  | 170  | 114 | 88  | 170  | 150 |           |      |      |    |
| 6  | Romero et al, 2010 (A)          | F2F Derm vs TD (SFTD)                       | 457 | 192  |    |     |     |      |     |     | 88   | 368 | 325       |      |      |    |
| 7  | Romero et al, 2010 (B)          | F2F Derm vs TD (SFTD and videoconferencing) | 457 | 176  |    |     |     |      |     |     | 85   | 368 | 314       |      |      |    |
| 8  | Rubegni et al, 2011             | F2F Derm vs TD                              | 130 | 130  |    |     |     |      |     |     | 88   | 130 | 114       | 0.86 | 130  |    |
| 9  | Saleh et al, 2017               | F2F Derm vs TD                              | 600 | 600  |    |     | 88  | 600  | 526 | 81  | 600  | 488 | 0.46-0.52 | 600  |      |    |
| 10 | Senel, et al, 2013              | F2F Derm vs TD1 (no dermoscopy)             | 150 | 150  |    |     |     |      |     |     |      |     |           | 0.77 | 150  |    |
| 11 | Senel, et al, 2013              | F2F Derm vs TD2 (no dermoscopy)             | 150 | 150  |    |     |     |      |     |     |      |     |           | 0.75 | 150  |    |
| 12 | Senel, et al, 2013              | F2F Derm vs TD1 (dermoscopy)                | 150 | 150  |    |     |     |      |     |     |      |     |           | 0.85 | 150  |    |
| 13 | Senel, et al, 2013              | F2F Derm vs TD2 (dermoscopy)                | 150 | 150  |    |     |     |      |     |     |      |     |           | 0.86 | 150  |    |
| 14 | Sola-Ortigosa et al, 2020 (A)   | F2F Derm vs TD1 (no dermoscopy)             | 636 | 1000 |    |     | 82  | 1000 | 821 | 88  | 1000 | 875 | 0.87      | 1000 |      |    |
| 15 | Sola-Ortigosa et al, 2020 (B)   | F2F Derm vs TD2 (no dermoscopy)             | 636 | 1000 |    |     | 83  | 1000 | 832 | 84  | 1000 | 835 | 0.83      | 1000 |      |    |

1  
2  
3  
4  
5  
6  
7  
8  
9  
10  
11  
12  
13  
14  
15  
16  
17  
18  
19  
20  
21  
22  
23  
24  
25  
26  
27  
28  
29  
30  
31  
32  
33  
34  
35  
36  
37  
38  
39  
40  
41  
42  
43  
44  
45  
46  
47

|                               |                                                            |      |      |    |     |     |    |      |     |    |      |      |    |     |      |      |
|-------------------------------|------------------------------------------------------------|------|------|----|-----|-----|----|------|-----|----|------|------|----|-----|------|------|
| Sola-Ortigosa et al, 2020 (C) | F2F Derm vs TD3 (no dermoscopy)                            | 636  | 1000 |    |     |     | 81 | 1000 | 813 | 88 | 1000 | 884  |    |     | 0.89 | 1000 |
| Sola-Ortigosa et al, 2020 (D) | F2F Derm vs TD1 (dermoscopy)                               | 636  | 1000 |    |     |     | 92 | 1000 | 915 | 92 | 1000 | 915  |    |     | 0.91 | 1000 |
| Sola-Ortigosa et al, 2020 (E) | F2F Derm vs TD2 (dermoscopy)                               | 636  | 1000 |    |     |     | 90 | 1000 | 902 | 91 | 1000 | 912  |    |     | 0.9  | 1000 |
| Sola-Ortigosa et al, 2020 (F) | F2F Derm vs TD3 (dermoscopy)                               | 636  | 1000 |    |     |     | 90 | 1000 | 899 | 90 | 1000 | 903  |    |     | 0.89 | 1000 |
| Tan et al, 2010 (A)           | F2F Derm vs TD1, F2F Derm 1 vs F2F Derm 2                  | 200  | 491  | 82 | 191 | 157 | 72 | 491  | 355 | 74 | 385  | 283  |    |     |      |      |
| Tan et al, 2010 (B)           | F2F Derm vs TD2, F2F Derm 2 vs F2F Derm 3                  | 200  | 491  | 76 | 106 | 80  |    |      |     | 74 | 219  | 162  |    |     |      |      |
| Tan et al, 2010 (C)           | F2F Derm 1 vs F2F Derm 3                                   | 200  | 491  | 76 | 194 | 147 |    |      |     |    |      |      |    |     |      |      |
| Tran et al, 2011              | F2F Derm vs TD                                             | 30   | 30   |    |     |     |    |      |     | 75 | 30   | 23   |    |     |      |      |
| Vano-Galvan et al, 2011       | F2F Derm vs TD                                             | 100  | 100  |    |     |     |    |      |     | 69 | 2000 | 1381 |    |     |      |      |
| Vestergaard et al, 2020 (A)   | A F2F Derm vs TD1                                          | 519  | 600  |    |     |     | 62 | 600  | 370 | 62 | 600  | 372  | 58 | 292 | 170  |      |
| Vestergaard et al, 2020 (B)   | F2F Derm vs TD2                                            | 519  | 600  |    |     |     |    |      |     | 60 | 600  | 361  | 54 | 292 | 157  |      |
| Warshaw et al, 2015 (A)       | F2F Derm vs TD (non biopsied pigmented lesions, Macro)     | 2152 | 3021 |    |     |     |    |      |     | 76 | 753  | 570  |    |     | 0.56 | 753  |
| Warshaw et al, 2015 (B)       | F2F Derm vs TD (non biopsied pigmented lesions, Macro+PLD) | 2152 | 3021 |    |     |     |    |      |     | 75 | 752  | 566  |    |     | 0.56 | 752  |



1  
2  
3  
4  
5  
6  
7  
8  
9  
10  
11  
12  
13  
14  
15  
16  
17  
18  
19  
20  
21  
22  
23  
24  
25  
26  
27  
28  
29  
30  
31  
32  
33  
34  
35  
36  
37  
38  
39  
40  
41  
42  
43  
44  
45  
46  
47

|                                  |                |    |    |    |    |    |    |    |    |
|----------------------------------|----------------|----|----|----|----|----|----|----|----|
| Zink et al,<br>2017, Sept<br>(B) | F2F Derm vs TD | 26 | 26 | 92 | 26 | 24 | 67 | 26 | 17 |
|----------------------------------|----------------|----|----|----|----|----|----|----|----|

**eTable 3. Included unique study groupings and letter codes.**  
 TD: TeleDermatology, TDs: TeleDermatologists, Derm: Dermatologist, F2F: Face-to-Face, SFTD: Store And Forward Technology, PLD: Polarized Light Dermoscopy, Macro: Macroscopic clinical images.

For peer review only

| Study ID                  | Journal                                                                                           | Reason For Exclusion |
|---------------------------|---------------------------------------------------------------------------------------------------|----------------------|
| NCT03034694, 2016         | <a href="http://ClinicalTrials.gov">ClinicalTrials.gov</a>                                        | Wrong study design   |
| Andersson et al, 2017     | Lakartidningen                                                                                    | Wrong study design   |
| Romero et al, 2018        | Actas dermo-sifiliograficas                                                                       | Wrong study design   |
| Orruno et al, 2016        | Health Technology Assessment Database                                                             | Wrong study design   |
| Batalla et al, 2016       | Piel                                                                                              | Wrong study design   |
| Kroemer et al, 2011       | British Journal of Dermatology                                                                    | Wrong study design   |
| Ernstberger et al, 2014   | Zentralblatt fur Chirurgie                                                                        | Wrong study design   |
| Totty et al, 2018         | Journal of wound care                                                                             | Wrong study design   |
| Wurm et al, 2013          | Journal of Telemedicine and Telecare                                                              | Wrong study design   |
| Wang et al, 2017          | Telemedicine journal and e-health : the official journal of the American Telemedicine Association | Wrong study design   |
| Singh et al, 2011         | Australasian Journal of Dermatology                                                               | Wrong study design   |
| Grey et al, 2017          | Dermatitis                                                                                        | Wrong study design   |
| Crompton et al, 2010      | Journal of Visual Communication in Medicine                                                       | Wrong study design   |
| Ali et al, 2021           | JMIR formative research                                                                           | Wrong study design   |
| Boyce et al, 2011         | Dermatology                                                                                       | Wrong study design   |
| Berg et al, 2017          | Sarcoidosis Vasculitis and Diffuse Lung Diseases                                                  | Wrong study design   |
| Shin et al, 2014          | Journal of telemedicine and telecare                                                              | Wrong study design   |
| Gacto-Sanchez et al, 2020 | Burns : journal of the International Society for Burn Injuries                                    | Wrong study design   |
| Tian et al, 2017          | Journal of Cosmetic Dermatology                                                                   | Wrong study design   |
| Thind et al, 2011         | Clinical and Experimental Dermatology                                                             | Wrong study design   |
| Silveira et al, 2014      | BMC Dermatology                                                                                   | Wrong study design   |
| O'Connor et al, 2017      | JAMA Dermatology                                                                                  | Wrong study design   |
| Janda et al, 2020         | The Lancet. Digital health                                                                        | Wrong study design   |
| Day et al, 2020           | Military medicine                                                                                 | Wrong study design   |
| Karlsson et al, 2015      | Acta Dermato-Venereologica                                                                        | Wrong study design   |
| Seghers et al, 2015       | Australasian Journal of Dermatology                                                               | Wrong study design   |
| Hazenberget al, 2010      | Journal of Medical Engineering and Technology                                                     | Wrong study design   |
| Borve et al, 2015         | Acta Dermato-Venereologica                                                                        | Wrong study design   |
| Boissin et al, 2015       | Burns                                                                                             | Wrong study design   |
| Da Silva et al, 2018      | Dermatology online journal                                                                        | Wrong study design   |
| Devrim et al, 2019        | BMC pediatrics                                                                                    | Wrong study design   |
| Danielsson et al, 2016    | Health Technology Assessment Database                                                             | Wrong study design   |

|    |                           |                                                                                                   |                    |
|----|---------------------------|---------------------------------------------------------------------------------------------------|--------------------|
| 1  |                           |                                                                                                   |                    |
| 2  |                           |                                                                                                   |                    |
| 3  |                           |                                                                                                   |                    |
| 4  | Berglund et al, 2020      | Journal of the European Academy of Dermatology and Venereology : JEADV                            | Wrong study design |
| 5  |                           |                                                                                                   |                    |
| 6  | Forsblom et al, 2013      | Clinical Infectious Diseases                                                                      | Wrong study design |
| 7  | G Bianchi et al, 2020     | Journal of medical Internet research                                                              | Wrong study design |
| 8  |                           |                                                                                                   |                    |
| 9  | Congalton et al, 2015     | Journal of the European Academy of Dermatology and Venereology                                    | Wrong study design |
| 10 |                           |                                                                                                   |                    |
| 11 | Ferrandiz et al, 2012     | Archives of Dermatology                                                                           | Wrong study design |
| 12 |                           |                                                                                                   |                    |
| 13 | Ismail et al, 2018        | International Journal of Women's Dermatology                                                      | Wrong study design |
| 14 |                           |                                                                                                   |                    |
| 15 | Gamus et al, 2019         | International journal of medical informatics                                                      | Wrong study design |
| 16 |                           |                                                                                                   |                    |
| 17 | Paudel et al, 2020        | Case reports in dermatological medicine                                                           | Wrong study design |
| 18 |                           |                                                                                                   |                    |
| 19 | Georgesesen et al, 2020   | Telemedicine journal and e-health : the official journal of the American Telemedicine Association | Wrong study design |
| 20 |                           |                                                                                                   |                    |
| 21 | Gagnon et al, 2015        | Dermatology Times                                                                                 | Wrong study design |
| 22 |                           |                                                                                                   |                    |
| 23 | Philp et al, 2013         | Pediatric Dermatology                                                                             | Wrong study design |
| 24 |                           |                                                                                                   |                    |
| 25 | Mooney et al, 2011        | Skin Research and Technology                                                                      | Wrong study design |
| 26 | Do Khac et al, 2021       | JMIR mHealth and uHealth                                                                          | Wrong study design |
| 27 |                           |                                                                                                   |                    |
| 28 | Chambers et al, 2012      | Journal of the American Academy of Dermatology                                                    | Wrong study design |
| 29 |                           |                                                                                                   |                    |
| 30 | Garcia-Romero et al, 2011 | Telemedicine journal and e-health : the official journal of the American Telemedicine Association | Wrong study design |
| 31 |                           |                                                                                                   |                    |
| 32 |                           |                                                                                                   |                    |
| 33 | Ahmed et al, 2020         | Annals of internal medicine                                                                       | Wrong study design |
| 34 |                           |                                                                                                   |                    |
| 35 | Marwaha et al, 2019       | Journal of the American Academy of Dermatology                                                    | Wrong study design |
| 36 |                           |                                                                                                   |                    |
| 37 | NCT02122432, 2014         | <a href="https://clinicaltrials.gov">ClinicalTrials.gov</a>                                       | Wrong study design |
| 38 | Lowe et al, 2021          | Clinical and experimental dermatology                                                             | Wrong study design |
| 39 | Bowling et al, 2011       | Wound Repair and Regeneration                                                                     | Wrong study design |
| 40 |                           |                                                                                                   |                    |
| 41 | Marin-Gomez et al, 2020   | Journal of primary care & community health                                                        | Wrong study design |
| 42 |                           |                                                                                                   |                    |
| 43 | Veronese et al, 2021      | Diagnostics (Basel, Switzerland)                                                                  | Wrong study design |
| 44 |                           |                                                                                                   |                    |
| 45 | Ismail et al, 2018        | International journal of dermatology                                                              | Wrong study design |
| 46 | NCT02905851, 2016         | <a href="https://clinicaltrials.gov">ClinicalTrials.gov</a>                                       | Wrong study design |
| 47 |                           |                                                                                                   |                    |
| 48 | Trinidad et al, 2020      | Journal of the American Academy of Dermatology                                                    | Wrong study design |
| 49 |                           |                                                                                                   |                    |
| 50 | Tensen et al, 2019        | Studies in health technology and informatics                                                      | Wrong study design |
| 51 |                           |                                                                                                   |                    |
| 52 | Karavan et al, 2014       | Journal of telemedicine and telecare                                                              | Wrong study design |
| 53 |                           |                                                                                                   |                    |
| 54 | Viola et al, 2011         | Archives of Dermatology                                                                           | Wrong study design |
| 55 |                           |                                                                                                   |                    |
| 56 | van Netten et al, 2017    | Scientific reports                                                                                | Wrong study design |
| 57 |                           |                                                                                                   |                    |
| 58 |                           |                                                                                                   |                    |
| 59 |                           |                                                                                                   |                    |
| 60 |                           |                                                                                                   |                    |

|    |                             |                                                                                                                            |                                         |
|----|-----------------------------|----------------------------------------------------------------------------------------------------------------------------|-----------------------------------------|
| 1  |                             |                                                                                                                            |                                         |
| 2  |                             |                                                                                                                            |                                         |
| 3  |                             |                                                                                                                            |                                         |
| 4  | Cai et al, 2016             | Burns : journal of the International Society for Burn Injuries                                                             | Wrong study design                      |
| 5  |                             |                                                                                                                            |                                         |
| 6  | Hazenberg et al, 2010       | Diabetes Technology and Therapeutics                                                                                       | Wrong study design                      |
| 7  | Jacoby et al, 2021          | Journal of drugs in dermatology : JDD                                                                                      | Wrong study design                      |
| 8  |                             |                                                                                                                            |                                         |
| 9  |                             |                                                                                                                            |                                         |
| 10 | Pak et al, 2018             | Wound repair and regeneration : official publication of the Wound Healing Society [and] the European Tissue Repair Society | Wrong study design                      |
| 11 |                             |                                                                                                                            |                                         |
| 12 |                             |                                                                                                                            |                                         |
| 13 | Kummerow Broman et al, 2019 | JAMA surgery                                                                                                               | Wrong study design                      |
| 14 |                             |                                                                                                                            |                                         |
| 15 |                             |                                                                                                                            |                                         |
| 16 | Munoz-Lopez et al, 2021     | Journal of the European Academy of Dermatology and Venereology : JEADV                                                     | Wrong study design                      |
| 17 |                             |                                                                                                                            |                                         |
| 18 | Markun et al, 2017          | Medicine                                                                                                                   | Wrong study design                      |
| 19 | Piette et al, 2017          | Journal of telemedicine and telecare                                                                                       | Wrong study design                      |
| 20 | Tan et al, 2010             | British Journal of Dermatology                                                                                             | Wrong study design                      |
| 21 |                             |                                                                                                                            |                                         |
| 22 | Watson et al, 2010          | Archives of Dermatology                                                                                                    | Wrong study design                      |
| 23 |                             |                                                                                                                            |                                         |
| 24 | Wiseman et al, 2016         | Journal of vascular surgery. Venous and lymphatic disorders                                                                | Wrong study design                      |
| 25 |                             |                                                                                                                            |                                         |
| 26 | Wolf et al, 2013            | JAMA dermatology                                                                                                           | Wrong study design                      |
| 27 |                             |                                                                                                                            |                                         |
| 28 | Laggis et al, 2020          | The American Journal of dermatopathology                                                                                   | Wrong study design                      |
| 29 |                             |                                                                                                                            |                                         |
| 30 | Kazi et al, 2021            | Telemedicine journal and e-health : the official journal of the American Telemedicine Association                          | Wrong study design                      |
| 31 |                             |                                                                                                                            |                                         |
| 32 |                             |                                                                                                                            |                                         |
| 33 | Kanthraj et al, 2013        | Indian Journal of Dermatology, Venereology and Leprology                                                                   | Wrong study design                      |
| 34 |                             |                                                                                                                            |                                         |
| 35 | Shah et al, 2016            | Journal of the American Academy of Dermatology                                                                             | Wrong study design                      |
| 36 |                             |                                                                                                                            |                                         |
| 37 | Kim et al, 2018             | Skin research and technology                                                                                               | Wrong study design                      |
| 38 |                             |                                                                                                                            |                                         |
| 39 | Nguyen et al, 2017          | Journal of Clinical and Aesthetic Dermatology                                                                              | Wrong study design                      |
| 40 |                             |                                                                                                                            |                                         |
| 41 | Rizvi et al, 2020           | PloS one                                                                                                                   | Wrong study design                      |
| 42 | Mehrtens et al, 2019        | Clinical and experimental dermatology                                                                                      | Wrong study design                      |
| 43 |                             |                                                                                                                            |                                         |
| 44 | Knudsen et al, 2012         | Lakartidningen                                                                                                             | Research letter or letter to the editor |
| 45 |                             |                                                                                                                            |                                         |
| 46 | Korman et al, 2020          | Journal of the American Academy of Dermatology                                                                             | Research letter or letter to the editor |
| 47 |                             |                                                                                                                            |                                         |
| 48 |                             |                                                                                                                            |                                         |
| 49 | Mercer et al, 2014          | Journal of Cutaneous Medicine and Surgery                                                                                  | Research letter or letter to the editor |
| 50 |                             |                                                                                                                            |                                         |
| 51 | Grunig et al, 2015          | JAMA Dermatology                                                                                                           | Research letter or letter to the editor |
| 52 |                             |                                                                                                                            |                                         |
| 53 | Cartron et al, 2020         | Dermatologic therapy                                                                                                       | Research letter or letter to the editor |
| 54 |                             |                                                                                                                            |                                         |
| 55 |                             |                                                                                                                            |                                         |
| 56 |                             |                                                                                                                            |                                         |
| 57 |                             |                                                                                                                            |                                         |
| 58 |                             |                                                                                                                            |                                         |
| 59 |                             |                                                                                                                            |                                         |
| 60 |                             |                                                                                                                            |                                         |



|    |                               |                                                                |                                         |
|----|-------------------------------|----------------------------------------------------------------|-----------------------------------------|
| 1  |                               |                                                                |                                         |
| 2  |                               |                                                                |                                         |
| 3  |                               |                                                                |                                         |
| 4  | McAfee et al, 2020            | Journal of the American Academy of Dermatology                 | Research letter or letter to the editor |
| 5  |                               |                                                                |                                         |
| 6  | Wong et al, 2021              | JAMA dermatology                                               | Research letter or letter to the editor |
| 7  |                               |                                                                |                                         |
| 8  | Baranowski et al, 2020        | Journal of the American Academy of Dermatology                 | Research letter or letter to the editor |
| 9  |                               |                                                                |                                         |
| 10 | Micheletti et al, 2014        | Journal of the American Academy of Dermatology                 | Research letter or letter to the editor |
| 11 |                               |                                                                |                                         |
| 12 | Osei-Tutu et al, 2013         | Journal of the American Academy of Dermatology                 | Research letter or letter to the editor |
| 13 |                               |                                                                |                                         |
| 14 | Nair et al, 2015              | International Journal of Dermatology                           | Research letter or letter to the editor |
| 15 |                               |                                                                |                                         |
| 16 | Miller et al, 2021            | Journal of the American Academy of Dermatology                 | Research letter or letter to the editor |
| 17 |                               |                                                                |                                         |
| 18 | Keleshian et al, 2017         | Journal of the American Academy of Dermatology                 | Research letter or letter to the editor |
| 19 |                               |                                                                |                                         |
| 20 | Keleshian et al, 2017         | Journal of the American Academy of Dermatology                 | Research letter or letter to the editor |
| 21 |                               |                                                                |                                         |
| 22 | HAYES; Inc et al, 2016        | Health Technology Assessment Database                          | Research letter or letter to the editor |
| 23 |                               |                                                                |                                         |
| 24 | Jacob et al, 2017             | Journal of telemedicine and telecare                           | Research letter or letter to the editor |
| 25 |                               |                                                                |                                         |
| 26 | Perkins et al, 2020           | Journal of the American Academy of Dermatology                 | Research letter or letter to the editor |
| 27 |                               |                                                                |                                         |
| 28 | Halpern et al, 2010           | British Journal of Dermatology                                 | Research letter or letter to the editor |
| 29 |                               |                                                                |                                         |
| 30 | Newman et al, 2020            | Journal of the American Academy of Dermatology                 | Research letter or letter to the editor |
| 31 |                               |                                                                |                                         |
| 32 | Hunt et al, 2020              | Clinical and experimental dermatology                          | Research letter or letter to the editor |
| 33 |                               |                                                                |                                         |
| 34 | Hunt et al, 2020              | Clinical and experimental dermatology                          | Research letter or letter to the editor |
| 35 |                               |                                                                |                                         |
| 36 | 2018                          | Nursing                                                        | Research letter or letter to the editor |
| 37 |                               |                                                                |                                         |
| 38 | Taneja et al, 2021            | Indian journal of dermatology, venereology and leprology       | Research letter or letter to the editor |
| 39 |                               |                                                                |                                         |
| 40 | Echeverria-Garcia et al, 2019 | Actas dermo-sifiliograficas                                    | Research letter or letter to the editor |
| 41 |                               |                                                                |                                         |
| 42 | Henning et al, 2010           | Archives of Dermatology                                        | Research letter or letter to the editor |
| 43 |                               |                                                                |                                         |
| 44 | Demo et al, 2019              | Clinical and experimental dermatology                          | Research letter or letter to the editor |
| 45 |                               |                                                                |                                         |
| 46 | Demo et al, 2019              | Clinical and experimental dermatology                          | Research letter or letter to the editor |
| 47 |                               |                                                                |                                         |
| 48 | Byamba et al, 2015            | British Journal of Dermatology                                 | Research letter or letter to the editor |
| 49 |                               |                                                                |                                         |
| 50 | Gupta et al, 2020             | Journal of the American Academy of Dermatology                 | Research letter or letter to the editor |
| 51 |                               |                                                                |                                         |
| 52 | De Giorgi et al, 2017         | Journal of the European Academy of Dermatology and Venereology | Research letter or letter to the editor |
| 53 |                               |                                                                |                                         |
| 54 | Duong et al, 2016             | Annales de Dermatologie et de Venereologie                     | Research letter or letter to the editor |
| 55 |                               |                                                                |                                         |
| 56 |                               |                                                                |                                         |
| 57 |                               |                                                                |                                         |
| 58 |                               |                                                                |                                         |
| 59 |                               |                                                                |                                         |
| 60 |                               |                                                                |                                         |

|    |                             |                                                                        |                                         |
|----|-----------------------------|------------------------------------------------------------------------|-----------------------------------------|
| 1  |                             |                                                                        |                                         |
| 2  |                             |                                                                        |                                         |
| 3  |                             |                                                                        |                                         |
| 4  | Mortimer et al, 2021        | Journal of the American Academy of Dermatology                         | Research letter or letter to the editor |
| 5  |                             |                                                                        |                                         |
| 6  | Gravely et al, 2010         | Journal of the American Academy of Dermatology                         | Research letter or letter to the editor |
| 7  |                             |                                                                        |                                         |
| 8  | Choi et al, 2021            | International journal of dermatology                                   | Research letter or letter to the editor |
| 9  |                             |                                                                        |                                         |
| 10 |                             |                                                                        |                                         |
| 11 | Motley et al, 2012          | BMJ: British Medical Journal (Clinical Research Edition)               | Research letter or letter to the editor |
| 12 |                             |                                                                        |                                         |
| 13 | Leavitt et al, 2016         | Journal of the American Academy of Dermatology                         | Research letter or letter to the editor |
| 14 |                             |                                                                        |                                         |
| 15 | Cheng et al, 2020           | Dermatitis : contact, atopic, occupational, drug                       | Research letter or letter to the editor |
| 16 |                             |                                                                        |                                         |
| 17 |                             |                                                                        |                                         |
| 18 | Clark et al, 2021           | Journal of the American Academy of Dermatology                         | Research letter or letter to the editor |
| 19 |                             |                                                                        |                                         |
| 20 | Fuesl et al, 2010           | MMW-Fortschritte der Medizin                                           | Research letter or letter to the editor |
| 21 |                             |                                                                        |                                         |
| 22 | English III et al, 2013     | Journal of the American Academy of Dermatology                         | Research letter or letter to the editor |
| 23 |                             |                                                                        |                                         |
| 24 |                             |                                                                        |                                         |
| 25 | Cotes et al, 2021           | Journal of the American Academy of Dermatology                         | Research letter or letter to the editor |
| 26 |                             |                                                                        |                                         |
| 27 | Abi Rafeh et al, 2021       | Journal of cutaneous medicine and surgery                              | Research letter or letter to the editor |
| 28 |                             |                                                                        |                                         |
| 29 | Okeke et al, 2020           | The Journal of dermatological treatment                                | Research letter or letter to the editor |
| 30 |                             |                                                                        |                                         |
| 31 |                             |                                                                        |                                         |
| 32 | Splete et al, 2014          | Emergency Medicine (00136654)                                          | Research letter or letter to the editor |
| 33 |                             |                                                                        |                                         |
| 34 | Khosravi et al, 2021        | Clinical and experimental dermatology                                  | Research letter or letter to the editor |
| 35 |                             |                                                                        |                                         |
| 36 | Sivesind et al, 2021        | Journal of the American Academy of Dermatology                         | Research letter or letter to the editor |
| 37 |                             |                                                                        |                                         |
| 38 |                             |                                                                        |                                         |
| 39 | Stoecker et al, 2013        | JAMA dermatology                                                       | Research letter or letter to the editor |
| 40 |                             |                                                                        |                                         |
| 41 | Skayem et al, 2020          | Journal of the European Academy of Dermatology and Venereology : JEADV | Research letter or letter to the editor |
| 42 |                             |                                                                        |                                         |
| 43 | Su et al, 2020              | Journal of the American Academy of Dermatology                         | Research letter or letter to the editor |
| 44 |                             |                                                                        |                                         |
| 45 |                             |                                                                        |                                         |
| 46 | Massone et al, 2021         | Anais brasileiros de dermatologia                                      | Research letter or letter to the editor |
| 47 |                             |                                                                        |                                         |
| 48 | Li et al, 2021              | The Journal of infection                                               | Research letter or letter to the editor |
| 49 |                             |                                                                        |                                         |
| 50 |                             |                                                                        |                                         |
| 51 | Afanasiev et al, 2021       | Journal of the American Academy of Dermatology                         | Research letter or letter to the editor |
| 52 |                             |                                                                        |                                         |
| 53 | Varma et al, 2011           | British Journal of Dermatology                                         | Research letter or letter to the editor |
| 54 |                             |                                                                        |                                         |
| 55 | Van Der Heijden et al, 2010 | Journal of the European Academy of Dermatology and Venereology         | Research letter or letter to the editor |
| 56 |                             |                                                                        |                                         |
| 57 |                             |                                                                        |                                         |
| 58 |                             |                                                                        |                                         |
| 59 |                             |                                                                        |                                         |
| 60 |                             |                                                                        |                                         |

|    |                             |                                                             |                                         |
|----|-----------------------------|-------------------------------------------------------------|-----------------------------------------|
| 1  |                             |                                                             |                                         |
| 2  |                             |                                                             |                                         |
| 3  |                             |                                                             |                                         |
| 4  | Motley et al, 2012          | BMJ (Online)                                                | Research letter or letter to the editor |
| 5  |                             |                                                             |                                         |
| 6  | Villani et al, 2020         | Dermatologic therapy                                        | Research letter or letter to the editor |
| 7  |                             |                                                             |                                         |
| 8  | Portnoy et al, 2018         | The journal of allergy and clinical immunology. In practice | Research letter or letter to the editor |
| 9  |                             |                                                             |                                         |
| 10 |                             |                                                             |                                         |
| 11 | Tschandl et al, 2018        | British Journal of Dermatology                              | Research letter or letter to the editor |
| 12 |                             |                                                             |                                         |
| 13 | Poolworaluk et al, 2020     | Future healthcare journal                                   | Research letter or letter to the editor |
| 14 |                             |                                                             |                                         |
| 15 | Anonymous et al, 2020       | Journal of drugs in dermatology : JDD                       | Research letter or letter to the editor |
| 16 |                             |                                                             |                                         |
| 17 | Tan et al, 2021             | Annals of the Academy of Medicine, Singapore                | Research letter or letter to the editor |
| 18 |                             |                                                             |                                         |
| 19 |                             |                                                             |                                         |
| 20 | Silva et al, 2021           | Anais brasileiros de dermatologia                           | Research letter or letter to the editor |
| 21 |                             |                                                             |                                         |
| 22 | de Giorgi et al, 2016       | International Journal of Dermatology                        | Wrong outcomes                          |
| 23 | Senel et al, 2014           | Journal of telemedicine and telecare                        | Wrong outcomes                          |
| 24 |                             |                                                             |                                         |
| 25 | Goodier et al, 2021         | Contact dermatitis                                          | Wrong outcomes                          |
| 26 | Foolad et al, 2017          | International Journal of Dermatology                        | Wrong outcomes                          |
| 27 |                             |                                                             |                                         |
| 28 | Wells et al, 2020           | The Journal of clinical and aesthetic dermatology           | Wrong outcomes                          |
| 29 |                             |                                                             |                                         |
| 30 | Arzberger et al, 2016       | Acta Dermato-Venereologica                                  | Wrong outcomes                          |
| 31 | Creighton-Smith et al, 2017 | International Journal of Dermatology                        | Wrong outcomes                          |
| 32 |                             |                                                             |                                         |
| 33 |                             |                                                             |                                         |
| 34 | Marwaha et al, 2019         | Journal of the American Academy of Dermatology              | Wrong outcomes                          |
| 35 |                             |                                                             |                                         |
| 36 | Pasquali et al, 2021        | Actas dermo-sifiliograficas                                 | Wrong outcomes                          |
| 37 | Vestergaard et al, 2020     | Family practice                                             | Wrong outcomes                          |
| 38 |                             |                                                             |                                         |
| 39 | Kravets et al, 2018         | Acta dermatovenerologica Alpina, Pannonica, et Adriatica    | Wrong outcomes                          |
| 40 |                             |                                                             |                                         |
| 41 | Speiser et al, 2014         | American Journal of Dermatopathology                        | Wrong outcomes                          |
| 42 | N/A                         | Journal of the American Academy of Dermatology              | Wrong outcomes                          |
| 43 |                             |                                                             |                                         |
| 44 | Whited et al, 2013          | Journal of Telemedicine and Telecare                        | Wrong outcomes                          |
| 45 |                             |                                                             |                                         |
| 46 | Abhishek et al, 2021        | medRxiv                                                     | Wrong outcomes                          |
| 47 | Villa et al, 2020           | Internal and emergency medicine                             | Wrong outcomes                          |
| 48 | Lubeek et al, 2016          | Tijdschrift voor gerontologie en geriatrie                  | review                                  |
| 49 |                             |                                                             |                                         |
| 50 | Ndegwa et al, 2016          | Health Technology Assessment Database                       | review                                  |
| 51 |                             |                                                             |                                         |
| 52 | Moreno-Ramirez et al, 2017  | Acta dermato-venereologica                                  | review                                  |
| 53 |                             |                                                             |                                         |
| 54 | Moreno-Ramirez et al, 2017  | Acta Dermato-Venereologica                                  | review                                  |
| 55 |                             |                                                             |                                         |
| 56 |                             |                                                             |                                         |
| 57 |                             |                                                             |                                         |
| 58 |                             |                                                             |                                         |
| 59 |                             |                                                             |                                         |
| 60 |                             |                                                             |                                         |

|    |                                 |                                                                                                           |                    |
|----|---------------------------------|-----------------------------------------------------------------------------------------------------------|--------------------|
| 1  |                                 |                                                                                                           |                    |
| 2  |                                 |                                                                                                           |                    |
| 3  | Van Der Heijden et al, 2010     | Huisarts en Wetenschap                                                                                    | review             |
| 4  |                                 |                                                                                                           |                    |
| 5  | Walocko et al, 2017             | Dermatologic Clinics                                                                                      | review             |
| 6  |                                 |                                                                                                           |                    |
| 7  | Roman et al, 2014               | Journal of the Dermatology Nurses' Association                                                            | review             |
| 8  |                                 |                                                                                                           |                    |
| 9  |                                 |                                                                                                           |                    |
| 10 | Hart et al, 2011                | Telemedicine journal and e-health : the official journal of the American Telemedicine Association         | review             |
| 11 |                                 |                                                                                                           |                    |
| 12 |                                 |                                                                                                           |                    |
| 13 |                                 |                                                                                                           |                    |
| 14 | Elsner et al, 2020              | Journal der Deutschen Dermatologischen Gesellschaft = Journal of the German Society of Dermatology : JDDG | review             |
| 15 |                                 |                                                                                                           |                    |
| 16 |                                 |                                                                                                           |                    |
| 17 | Kaliyadan et al, 2020           | Indian journal of dermatology                                                                             | review             |
| 18 |                                 |                                                                                                           |                    |
| 19 | Burch et al,                    |                                                                                                           | review             |
| 20 | Evans et al, 2017               | Pharmazeutische Zeitung                                                                                   | Editorial          |
| 21 |                                 |                                                                                                           |                    |
| 22 | Anonymous. et al, 2016          | Journal of AHIMA / American Health Information Management Association                                     | Editorial          |
| 23 |                                 |                                                                                                           |                    |
| 24 | Luk et al, 2018                 | Hong Kong Journal of Dermatology and Venereology                                                          | Editorial          |
| 25 |                                 |                                                                                                           |                    |
| 26 | Queen et al, 2018               | International wound journal                                                                               | Editorial          |
| 27 |                                 |                                                                                                           |                    |
| 28 | Anguita et al, 2014             | Nurse Prescribing                                                                                         | Editorial          |
| 29 | Haworth et al, 2020             | Clinical and experimental dermatology                                                                     | Editorial          |
| 30 |                                 |                                                                                                           |                    |
| 31 | Romero-Aguilera et al, 2019     | Actas dermo-sifiliograficas                                                                               | Editorial          |
| 32 |                                 |                                                                                                           |                    |
| 33 | Barrio Garde et al, 2016        | Piel                                                                                                      | Editorial          |
| 34 |                                 |                                                                                                           |                    |
| 35 | Morand et al, 2010              | Annales de dermatologie et de venereologie                                                                | Editorial          |
| 36 |                                 |                                                                                                           |                    |
| 37 | N/A                             | Journal of the American Academy of Dermatology                                                            | Abstract           |
| 38 |                                 |                                                                                                           |                    |
| 39 | N/A                             | Journal of the American Academy of Dermatology                                                            | Abstract           |
| 40 |                                 |                                                                                                           |                    |
| 41 | Bianchi et al, 2020             | Journal of the American Academy of Dermatology                                                            | Abstract           |
| 42 |                                 |                                                                                                           |                    |
| 43 |                                 |                                                                                                           |                    |
| 44 | Creadore et al, 2020            | Journal of the American Academy of Dermatology                                                            | Abstract           |
| 45 |                                 |                                                                                                           |                    |
| 46 | N/A                             | Journal of the American Academy of Dermatology                                                            | Abstract           |
| 47 |                                 |                                                                                                           |                    |
| 48 | Tognetti L et al, 2020          |                                                                                                           | Abstract           |
| 49 | SPLETE et al, 2014              | Emergency Medicine (00136654)                                                                             | Abstract           |
| 50 |                                 |                                                                                                           |                    |
| 51 | N/A                             | Journal of the American Academy of Dermatology                                                            | Abstract           |
| 52 |                                 |                                                                                                           |                    |
| 53 | Dahlen Gyllencreutz et al, 2017 | Journal of the European Academy of Dermatology and Venereology                                            | Wrong intervention |
| 54 |                                 |                                                                                                           |                    |
| 55 | Tandjung et al, 2015            | Journal of Evaluation in Clinical Practice                                                                | Wrong intervention |
| 56 |                                 |                                                                                                           |                    |
| 57 |                                 |                                                                                                           |                    |
| 58 |                                 |                                                                                                           |                    |
| 59 |                                 |                                                                                                           |                    |
| 60 |                                 |                                                                                                           |                    |

|                                   |                                                                                                   |                                           |
|-----------------------------------|---------------------------------------------------------------------------------------------------|-------------------------------------------|
| Paradela-De-La-Morena et al, 2015 | European Journal of Dermatology                                                                   | Wrong intervention                        |
| Horsham et al, 2015               | British Journal of Dermatology                                                                    | Wrong intervention                        |
| Saenz et al, 2018                 | International Journal of Telemedicine and Applications                                            | Wrong intervention                        |
| Kochmann et al, 2016              | Telemedicine journal and e-health : the official journal of the American Telemedicine Association | Wrong comparator                          |
| Markun et al, 2017                | Medicine (United States)                                                                          | Wrong comparator                          |
| Feigenbaum et al, 2017            | Pediatric Dermatology                                                                             | Wrong comparator                          |
| Massone et al, 2014               | Journal of the European Academy of Dermatology and Venereology                                    | Wrong comparator                          |
| MacLellan et al, 2021             | Journal of the American Academy of Dermatology                                                    | Wrong comparator                          |
| Koysombat et al, 2021             | Journal of plastic, reconstructive & aesthetic surgery : JPRAS                                    | Correspondence                            |
| Jakhar et al, 2020                | Clinical and experimental dermatology                                                             | Correspondence                            |
| Alkmim et al, 2013                | Journal of Telemedicine and Telecare                                                              | Correspondence                            |
| NCT02836665, 2016                 | <a href="https://clinicaltrials.gov/ct2/show/study/NCT02836665">ClinicalTrials.gov</a>            | Clinical trial - no associated manuscript |
| JPRN-UMIN000020873 et al, 2016    |                                                                                                   | Clinical trial - no associated manuscript |
| Fogel et al, 2016                 | Journal of the American Academy of Dermatology                                                    | Commentary                                |
| Hoyer et al, 2020                 | Cutis                                                                                             | Commentary                                |
| Pasadyan et al, 2020              | Journal of the American Academy of Dermatology                                                    | Duplicate                                 |
| Moreno-Ramirez et al, 2017        | American Journal of Clinical Dermatology                                                          | Erratum                                   |
| Trovato et al, 2011               | Eplasty                                                                                           | Wrong patient population                  |
| Bowns et al, 2016                 | Health Technology Assessment Database                                                             | Wrong publication date                    |
| Gemelas et al, 2019               | Telemedicine journal and e-health : the official journal of the American Telemedicine Association | Wrong setting                             |

242 **eTable 4. List of studies excluded at the full-text screening stage.**

A

| Study                            | Risk of bias domains |    |    |    | Overall |
|----------------------------------|----------------------|----|----|----|---------|
|                                  | D1                   | D2 | D3 | D4 |         |
| Altieri, et al, 2017             | +                    | +  | +  | +  | +       |
| Azfar, et al, 2014               | +                    | +  | +  | +  | X       |
| Barbieri, et al, 2014            | +                    | +  | -  | +  | -       |
| Barcaui, et al, 2018             | +                    | +  | X  | X  | X       |
| Batalla, et al, 2015             | -                    | +  | +  | +  | -       |
| Borve, et al, 2012               | +                    | +  | X  | X  | X       |
| Borve, et al, 2013               | X                    | -  | +  | +  | X       |
| Carter, et al, 2017              | X                    | -  | +  | X  | X       |
| Chen, et al, 2010                | +                    | X  | X  | -  | X       |
| Clarke, et al, 2021              | X                    | X  | +  | +  | X       |
| Costello, et al, 2019            | X                    | +  | X  | X  | X       |
| Duong, et al, 2014               | +                    | -  | X  | X  | X       |
| Gabel, et al, 2021               | X                    | +  | +  | X  | X       |
| Gatica, 2015                     | +                    | +  | -  | +  | -       |
| Gerhardt, et al, 2021            | X                    | -  | X  | X  | X       |
| Giavina-Bianchi, et al, Oct 2020 | X                    | +  | -  | X  | X       |
| Giavina-Bianchi, et al, Nov 2020 | X                    | +  | -  | X  | X       |
| Gonzalez-Coloma, et al, 2019     | +                    | X  | X  | +  | X       |
| Goulart-Silveira, et al, 2019    | X                    | +  | +  | X  | X       |
| Jones, et al, 2021               | +                    | -  | +  | +  | -       |
| Keller, et al, 2020              | +                    | +  | +  | +  | +       |
| Lamel, et al, 2012               | -                    | -  | +  | +  | -       |
| Marchell, et al, 2017            | +                    | +  | +  | +  | +       |
| Muir, et al, 2011                | X                    | +  | +  | X  | X       |
| Nami, et al, 2015                | X                    | +  | +  | +  | X       |
| Okita, et al, 2016               | +                    | +  | +  | +  | X       |
| Patro, et al, 2015               | +                    | +  | X  | +  | X       |
| Piccoli, et al, 2015             | X                    | +  | X  | X  | X       |
| Ribas, et al, 2010               | X                    | +  | X  | X  | X       |
| Rubegni, et al, 2011             | +                    | +  | +  | +  | +       |
| Saleh, et al, 2017               | +                    | +  | +  | +  | +       |
| Senel, et al, 2013               | X                    | +  | +  | X  | X       |
| Sola-Ortigosa, et al, 2020       | +                    | +  | X  | X  | X       |
| Tan, et al, 2010                 | X                    | X  | +  | X  | X       |
| Tran, et al, 2011                | +                    | +  | X  | +  | X       |
| Vano-Galvan, et al, 2010         | +                    | +  | +  | +  | X       |
| Vestergaard, et al, 2020         | +                    | +  | +  | X  | X       |
| Warshaw, et al, 2015             | +                    | -  | +  | +  | -       |
| Zanini, 2013                     | -                    | +  | +  | -  | -       |
| Zink, et al, 2017, July          | +                    | -  | X  | X  | X       |
| Zink, et al, 2017, Sept          | +                    | +  | +  | +  | +       |

Domains:  
D1: Patient selection.  
D2: Index test.  
D3: Reference standard.  
D4: Flow & timing.

Judgement  
X High  
- Some concerns  
+ Low

Preprint only

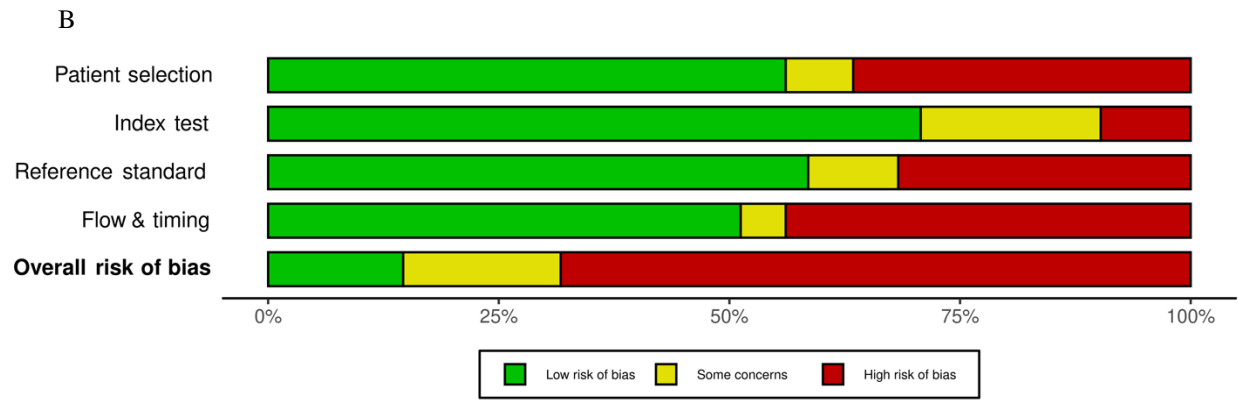

**C**

| Study                        | Risk of bias domains |     |     |      |     | Overall       |
|------------------------------|----------------------|-----|-----|------|-----|---------------|
|                              | D1                   | D2  | D3  | D4   | D5  |               |
| Rios-Yuil, 2011              | High                 | Low | Low | High | Low | High          |
| Romero, et al, 2010          | Low                  | Low | Low | High | Low | Some concerns |
| Romero Aguilera, et al, 2014 | Low                  | Low | Low | High | Low | Some concerns |

Domains:  
 D1: Bias arising from the randomization process.  
 D2: Bias due to deviations from intended intervention.  
 D3: Bias due to missing outcome data.  
 D4: Bias in measurement of the outcome.  
 D5: Bias in selection of the reported result.

Judgement  
 High (Red X)  
 Some concerns (Yellow -)  
 Low (Green +)

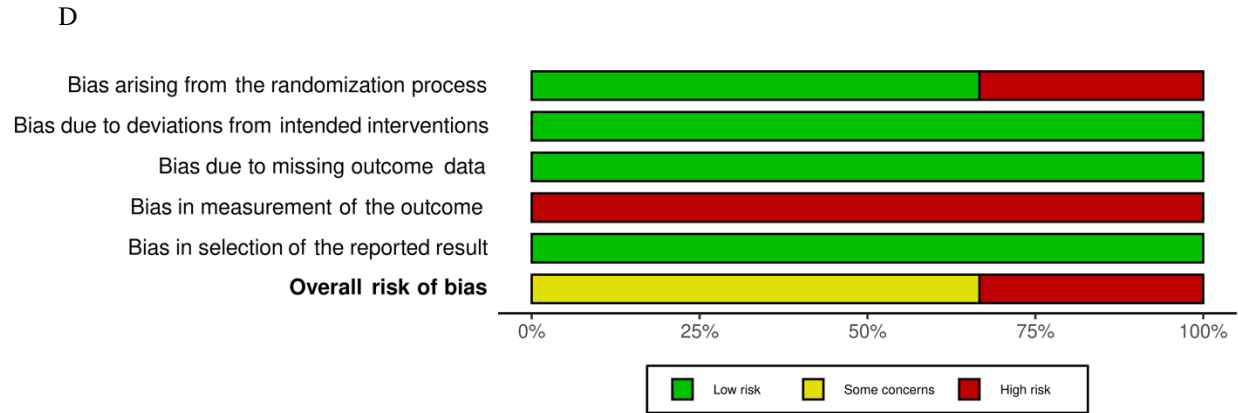

**eTable 5. Risk of Bias (ROB) results.**

(A,B) QUADAS-2 RoB analysis of 41 observational studies. (C,D) ROB-2 analysis of three randomized controlled trials.

250 **eReferences.**

- 251 1. Hoyer P, Ahatov R, Ross L. Utilization of telehealth services during the COVID-19 pandemic. *Cutis*.  
252 2020;106(2):70-71. doi:<https://dx.doi.org/10.12788/cutis.0034>
- 253 2. Gomez Arias PJ, Arias Blanco MC, Redondo Sanchez J, Escribano Villanueva F, Velez Garcia-Nieto AJ.  
254 [Usefulness and efficiency of teledermoscopy in skin cancer management in primary care]. *Semergen*.  
255 2020;46(8):553-559. doi:<https://dx.doi.org/10.1016/j.semerg.2020.06.026>
- 256 3. Jacoby T, Woolard A, Chamoun S, Moy R. Asynchronous Teledermatology Assessment of Young Adult  
257 Acne Likely Concordant With In-Person Evaluation. *Journal of drugs in dermatology : JDD*. 2021;20(4):432-435.  
258 doi:<https://dx.doi.org/10.36849/JDD.2021.5688>
- 259 4. McHugh ML. Interrater reliability: the kappa statistic. *Biochem Med (Zagreb)*. 2012;22(3):276-82.
- 260 5. DerSimonian R, Laird N. Meta-analysis in clinical trials. *Control Clin Trials*. Sep 1986;7(3):177-88.  
261 doi:10.1016/0197-2456(86)90046-2
- 262 6. Altieri L, Hu J, Nguyen A, et al. Interobserver reliability of teledermatology across all Fitzpatrick skin types.  
263 *Journal of telemedicine and telecare*. 2017;23(1):68-73. doi:<http://dx.doi.org/10.1177/1357633X15621226>
- 264 7. Castelo-Soccio L, Kovarik CL, Azfar RS, et al. Reliability and validity of mobile teledermatology in human  
265 immunodeficiency virus-positive patients in botswana a pilot study. *JAMA Dermatology*. 2014;150(6):601-607.  
266 doi:<http://dx.doi.org/10.1001/jamadermatol.2013.7321>
- 267 8. Barbieri JS, Nelson CA, James WD, et al. The reliability of teledermatology to triage inpatient dermatology  
268 consultations. *JAMA Dermatology*. 2014;150(4):419-424. doi:<http://dx.doi.org/10.1001/jamadermatol.2013.9517>
- 269 9. Barcaui CB, Lima PMO. Application of teledermoscopy in the diagnosis of pigmented lesions. *International*  
270 *Journal of Telemedicine and Applications*. 2018;2018((Barcaui) Adjunct Professor of Dermatology, Faculty of  
271 Medical Sciences, State University of Rio de Janeiro, PhD in Medicine (Dermatology), University of Sao Paulo,  
272 Dermatology Department, Pedro Ernesto University Hospital, Rio de Janeiro State University):1624073.  
273 doi:<http://dx.doi.org/10.1155/2018/1624073>
- 274 10. Batalla A, Suh-Oh HJ, Abalde T, Salgado-Boquete L, de la Torre C. Teledermatology in Paediatrics.  
275 Observations in daily clinical practice. *Anales de pediatria (Barcelona, Spain : 2003)*. 2016;84(6):324-330.  
276 doi:<http://dx.doi.org/10.1016/j.anpedi.2015.07.005>
- 277 11. Borve A, Holst A, Gente-Lidholm A, Molina-Martinez R, Paoli J. Use of the mobile phone multimedia  
278 messaging service for teledermatology. *Journal of Telemedicine and Telecare*. 2012;18(5):292-296.  
279 doi:<http://dx.doi.org/10.1258/jtt.2012.120206>
- 280 12. Borve A, Terstappen K, Sandberg C, Paoli J. Mobile teledermoscopy-there's an app for that! *Dermatology*  
281 *practical & conceptual*. 2013;3(2):41-8. doi:<https://dx.doi.org/10.5826/dpc.0302a05>
- 282 13. Carter ZA, Li X, Goldman S, et al. Creation of an internal teledermatology store-and-forward system in an  
283 existing electronic health record: A pilot study in a safety-net public health and hospital system. *JAMA*  
284 *Dermatology*. 2017;153(7):644-650. doi:<http://dx.doi.org/10.1001/jamadermatol.2017.0204>
- 285 14. Chen TS, Goldyne ME, Mathes EFD, Frieden IJ, Gilliam AE. Pediatric teledermatology: Observations based  
286 on 429 consults. *Journal of the American Academy of Dermatology*. 2010;62(1):61-66.  
287 doi:<http://dx.doi.org/10.1016/j.jaad.2009.05.039>
- 288 15. Clarke EL, Reichenberg JS, Ahmed AM, et al. The utility of teledermatology in the evaluation of skin  
289 lesions. *Journal of telemedicine and telecare*. 2021;(9506702, cpj):1357633X20987423.  
290 doi:<https://dx.doi.org/10.1177/1357633X20987423>
- 291 16. Costello CM, Cumsy HJL, Maly CJ, et al. Improving Access to Care Through the Establishment of a Local,  
292 Teledermatology Network. *Telemedicine journal and e-health : the official journal of the American Telemedicine*  
293 *Association*. 2020;26(7):935-940. doi:<https://dx.doi.org/10.1089/tmj.2019.0051>
- 294 17. Duong TA, Cordoliani F, Julliard C, et al. Emergency department diagnosis and management of skin diseases  
295 with real-time teledermatologic expertise. *JAMA Dermatology*. 2014;150(7):743-747.  
296 doi:<http://dx.doi.org/10.1001/jamadermatol.2013.7792>
- 297 18. Gabel CK, Nguyen E, Karmouta R, et al. Use of teledermatology by dermatology hospitalists is effective in  
298 the diagnosis and management of inpatient disease. *Journal of the American Academy of Dermatology*.  
299 2021;84(6):1547-1553. doi:<https://dx.doi.org/10.1016/j.jaad.2020.04.171>
- 300 19. Gatica JL, Bertolo S, Morales E, Espinoza M, Contreras C. Store-and-forward teledermatology in Chile: A  
301 contribution to primary health care. *Piel*. 2015;30(3):148-154. doi:<http://dx.doi.org/10.1016/j.piel.2014.07.007>
- 302 20. Gerhardt CA, Foels R, Grewe S, Baldwin BT. Assessing the Diagnostic Accuracy of Teledermatology  
303 Consultations at a Local Veterans Affairs Dermatology Clinic. *Cureus*. 2021;13(6):e15406.  
304 doi:<https://dx.doi.org/10.7759/cureus.15406>



- 1  
2  
3 305 21. Giavina-Bianchi M, Azevedo MFD, Sousa RM, Cordioli E. Part II: Accuracy of Tele dermatology in Skin  
4 306 Neoplasms. *Frontiers in medicine*. 2020;7(101648047):598903. doi:<https://dx.doi.org/10.3389/fmed.2020.598903>  
5 307 22. Giavina-Bianchi M, Sousa R, Cordioli E. Part I: Accuracy of Tele dermatology in Inflammatory Dermatoses.  
6 308 *Frontiers in medicine*. 2020;7(101648047):585792. doi:<https://dx.doi.org/10.3389/fmed.2020.585792>  
7 309 23. Keller JJ, Johnson JP, Latour E. Inpatient tele dermatology: Diagnostic and therapeutic concordance among a  
8 310 hospitalist, dermatologist, and tele dermatologist using store-and-forward tele dermatology. *Journal of the American*  
9 311 *Academy of Dermatology*. 2020;82(5):1262-1267. doi:<https://dx.doi.org/10.1016/j.jaad.2020.01.030>  
10 312 24. Lamel SA, Haldeman KM, Ely H, Armstrong AW, Kovarik CL, Pak H. Application of mobile  
11 313 tele dermatology for skin cancer screening. *Journal of the American Academy of Dermatology*. 2012;67(4):576-581.  
12 314 doi:<http://dx.doi.org/10.1016/j.jaad.2011.11.957>  
13 315 25. Muir J, Xu C, Singh P, et al. Incorporating tele dermatology into emergency medicine. *EMA - Emergency*  
14 316 *Medicine Australasia*. 2011;23(5):562-568. doi:<http://dx.doi.org/10.1111/j.1742-6723.2011.01443.x>  
15 317 26. Nami N, Rubegni P, Fimiani M, Massone C, Hofmann-Wellenhof R, Cevenini G. Concordance and Time  
16 318 Estimation of Store-and-Forward Mobile Tele dermatology Compared to Classical Face-to-Face Consultation. *Acta*  
17 319 *Dermato-Venereologica*. 2015;95(1):35-39. doi:<http://dx.doi.org/10.2340/00015555-1876>  
18 320 27. Okita AL, Molina Tinoco LJ, Criado PR, et al. Use of Smartphones in Telemedicine: Comparative Study  
19 321 Between Standard and Tele dermatological Evaluation of High-Complex Care Hospital Inpatients. *Telemedicine*  
20 322 *journal and e-health : the official journal of the American Telemedicine Association*. 2016;22(9):755-760.  
21 323 doi:<http://dx.doi.org/10.1089/tmj.2015.0086>  
22 324 28. Patro BK, Tripathy JP, De D, Sinha S, Singh A, Kanwar AJ. Diagnostic agreement between a primary care  
23 325 physician and a tele dermatologist for common dermatological conditions in North India. *Indian dermatology online*  
24 326 *journal*. 2015;6(1):21-6. doi:<https://dx.doi.org/10.4103/2229-5178.148927>  
25 327 29. Ribas J, Schettini APM, Ribas CBDR, Cunha MDGS. Agreement between dermatological diagnoses made  
26 328 by live examination compared to analysis of digital images. *Anais Brasileiros de Dermatologia*. 2010;85(4):441-  
27 329 447. doi:<http://dx.doi.org/10.1590/s0365-05962010000400004>  
28 330 30. Rios-Yuil JM. [Correlation between face-to-face assessment and telemedicine for the diagnosis of skin  
29 331 disease in case conferences]. *Actas dermo-sifiliograficas*. 2012;103(2):138-43.  
30 332 doi:<https://dx.doi.org/10.1016/j.ad.2011.05.011>  
31 333 31. Romero Aguilera G, Cortina De La Calle P, Vera Iglesias E, Sanchez Caminero P, Garcia Arpa M, Garrido  
32 334 Martin JA. Interobserver reliability of store-and-forward tele dermatology in a clinical practice setting. *Actas Dermo-*  
33 335 *Sifiliograficas*. 2014;105(6):605-613. doi:<http://dx.doi.org/10.1016/j.adengl.2014.05.018>  
34 336 32. Romero G, Sanchez P, Garcia M, Cortina P, Vera E, Garrido JA. Randomized controlled trial comparing  
35 337 store-and-forward tele dermatology alone and in combination with web-camera videoconferencing. *Clinical and*  
36 338 *Experimental Dermatology*. 2010;35(3):311-317. doi:<http://dx.doi.org/10.1111/j.1365-2230.2009.03503.x>  
37 339 33. Rubegni P, Nami N, Poggiali S, et al. Geriatric tele dermatology: Store-and-forward vs. face-to-face  
38 340 examination. *Journal of the European Academy of Dermatology and Venereology*. 2011;25(11):1334-1339.  
39 341 doi:<http://dx.doi.org/10.1111/j.1468-3083.2011.03986.x>  
40 342 34. Saleh N, Abdel Hay R, Hegazy R, Hussein M, Gomaa D. Can tele dermatology be a useful diagnostic tool in  
41 343 dermatology practice in remote areas? An Egyptian experience with 600 patients. *Journal of telemedicine and*  
42 344 *telecare*. 2017;23(2):233-238. doi:<http://dx.doi.org/10.1177/1357633X16633944>  
43 345 35. Sola-Ortigosa J, Munoz-Santos C, Masat-Tico T, Isidro-Ortega J, Guilabert A, Grup d'Estudi de  
44 346 Tele dermatologia del Valles O. The Role of Tele dermatology and Tele dermatoscopy in the Diagnosis of Actinic  
45 347 Keratosis and Field Cancerization. *The Journal of investigative dermatology*. 2020;140(10):1976-1984.e4.  
46 348 doi:<https://dx.doi.org/10.1016/j.jid.2020.02.013>  
47 349 36. Tan E, Yung A, Oakley A, Rademaker M, Jameson M. Successful triage of patients referred to a skin lesion  
48 350 clinic using tele dermatoscopy (IMAGE IT trial). *British Journal of Dermatology*. 2010;162(4):803-811.  
49 351 doi:<http://dx.doi.org/10.1111/j.1365-2133.2010.09673.x>  
50 352 37. Tran K, Ayad M, Monir S, et al. Mobile tele dermatology in the developing world: Implications of a  
51 353 feasibility study on 30 Egyptian patients with common skin diseases. *Journal of the American Academy of*  
52 354 *Dermatology*. 2011;64(2):302-309. doi:<http://dx.doi.org/10.1016/j.jaad.2010.01.010>  
53 355 38. Vano-Galvan S, Aguayo-Leiva I, Rios-Buceta L, et al. Store-and-forward tele dermatology: Assessment of  
54 356 validity in a series of 2000 observations. *Actas Dermo-Sifiliograficas*. 2011;102(4):277-283.  
55 357 doi:[http://dx.doi.org/10.1016/S1578-2190\(11\)70803-4](http://dx.doi.org/10.1016/S1578-2190(11)70803-4)  
56 358 39. Vestergaard T, Prasad SC, Schuster A, Laurinaviciene R, Andersen MK, Bygum A. Diagnostic accuracy and  
57 359 interobserver concordance: tele dermatoscopy of 600 suspicious skin lesions in Southern Denmark. *Journal of the*

- 1  
2  
3 360 *European Academy of Dermatology and Venereology : JEADV*. 2020;34(7):1601-1608.  
4 361 doi:<https://dx.doi.org/10.1111/jdv.16275>  
5 362 40. Gravely AA, Warshaw EM, Nelson DB. Reliability of store and forward teledermatology for skin neoplasms.  
6 363 *Journal of the American Academy of Dermatology*. 2015;72(3):426-435.  
7 364 doi:<http://dx.doi.org/10.1016/j.jaad.2014.11.001>  
8 365 41. Zanini M. Analyze of diagnostic concordance between face-to-face and teledermatology diagnosis. *Medicina*  
9 366 *Cutanea Ibero-Latino-Americana*. 2013;41(2):60-62. doi:<http://dx.doi.org/10.4464/MC.2013.41.2.5058>  
10 367 42. Zink A, Kolbinger A, Leibl M, et al. The value of teledermatology using a mobile app compared to  
11 368 conventional dermatology. *European Journal of Dermatology*. 2017;27(4):429-431.  
12 369 doi:<http://dx.doi.org/10.1684/ejd.2017.3044>  
13 370 43. Zink A, Kolbinger A, Leibl M, et al. Teledermoscopy by mobile phones: Reliable help in the diagnosis of  
14 371 skin lesions? *Hautarzt*. 2017;68(11):890-895. doi:<http://dx.doi.org/10.1007/s00105-017-4042-0>  
15 372 44. Marchell R, Locatis C, Liu W-L, Ackerman M, Burges G, Maisiak R. Comparing High Definition Live  
16 373 Interactive and Store-and-Forward Consultations to In-Person Examinations. *Telemedicine journal and e-health :*  
17 374 *the official journal of the American Telemedicine Association*. 2017;23(3):213-218.  
18 375 doi:<http://dx.doi.org/10.1089/tmj.2016.0093>  
19 376 45. Jones L, Jameson M, Oakley A. Remote Skin Cancer Diagnosis: Adding Images to Electronic Referrals Is  
20 377 More Efficient Than Wait-Listing for a Nurse-Led Imaging Clinic. *Cancers (Basel)*. Nov 20  
21 378 2021;13(22)doi:10.3390/cancers13225828  
22 379 46. Gonzalez Coloma F, Sandoval Garces M, Gedda Quiroga V, Bley Banda C. Teledermatology in Remote  
23 380 Parts of Chile: Experience in 4 Isolated Rural Areas. *Actas dermo-sifiliograficas*. 2019;110(8):653-658.  
24 381 doi:<https://dx.doi.org/10.1016/j.ad.2019.01.009>  
25 382 47. Goulart Silveira CE, Carcano C, Mauad EC, Faleiros H, Longatto-Filho A. Call phone usefulness to improve  
26 383 the skin cancer screening: preliminary results and critical analysis of mobile app development. *Rural & Remote*  
27 384 *Health*. 2019;19(1):1-7. doi:10.22605/RRH4895  
28 385 48. Piccoli MF, Amorim BDB, Wagner HM, Nunes DH. Teledermatology protocol for screening of Skin cancer.  
29 386 *Anais Brasileiros de Dermatologia*. 2015;90(2):202-210. doi:<http://dx.doi.org/10.1590/abd1806-4841.20153163>  
30 387 49. Senel E, Baba M, Durdu M. The contribution of teledermatoscopy to the diagnosis and management of non-  
31 388 melanocytic skin tumours. *Journal of Telemedicine and Telecare*. 2013;19(1):60-63.  
32 389 doi:<http://dx.doi.org/10.1177/1357633X12474961>  
33 390 50. Gravely AA, Nelson DB, Warshaw EM. Accuracy of teledermatology/teledermoscopy and clinic-based  
34 391 dermatology for specific categories of skin neoplasms. *Journal of the American Academy of Dermatology*.  
35 392 2010;63(2):348-352. doi:<http://dx.doi.org/10.1016/j.jaad.2009.10.037>  
36  
37  
38  
39  
40  
41  
42  
43  
44  
45  
46  
47  
48  
49  
50  
51  
52  
53  
54  
55  
56  
57  
58  
59  
60

1  
2  
3  
4  
5  
6  
7  
8  
9  
10  
11  
12  
13  
14  
15  
16  
17  
18  
19  
20  
21  
22  
23  
24  
25  
26  
27  
28  
29  
30  
31  
32  
33  
34  
35  
36  
37  
38  
39  
40  
41  
42  
43  
44  
45  
46  
47  
48  
49  
50  
51  
52  
53  
54  
55  
56  
57  
58  
59  
60

394 This supplementary material has been provided by the authors to give readers additional information about their  
395 work.

For peer review only

## MOOSE Checklist for Meta-analyses of Observational Studies

| Item No                                     | Recommendation                                                                                                                                                                                                                                                               | Reported on Page No     |
|---------------------------------------------|------------------------------------------------------------------------------------------------------------------------------------------------------------------------------------------------------------------------------------------------------------------------------|-------------------------|
| Reporting of background should include      |                                                                                                                                                                                                                                                                              |                         |
| 1                                           | Problem definition                                                                                                                                                                                                                                                           | 4                       |
| 2                                           | Hypothesis statement                                                                                                                                                                                                                                                         | 4                       |
| 3                                           | Description of study outcome(s)                                                                                                                                                                                                                                              | 4-5                     |
| 4                                           | Type of exposure or intervention used                                                                                                                                                                                                                                        | 6-8                     |
| 5                                           | Type of study designs used                                                                                                                                                                                                                                                   | 6-8                     |
| 6                                           | Study population                                                                                                                                                                                                                                                             | 6-8                     |
| Reporting of search strategy should include |                                                                                                                                                                                                                                                                              |                         |
| 7                                           | Qualifications of searchers (eg, librarians and investigators)                                                                                                                                                                                                               | 6                       |
| 8                                           | Search strategy, including time period included in the synthesis and key words                                                                                                                                                                                               | 6-8                     |
| 9                                           | Effort to include all available studies, including contact with authors                                                                                                                                                                                                      | 6-8                     |
| 10                                          | Databases and registries searched                                                                                                                                                                                                                                            | 6-8                     |
| 11                                          | Search software used, name and version, including special features used (eg, explosion)                                                                                                                                                                                      | 6-8                     |
| 12                                          | Use of hand searching (eg, reference lists of obtained articles)                                                                                                                                                                                                             | 6-8                     |
| 13                                          | List of citations located and those excluded, including justification                                                                                                                                                                                                        | Supplement              |
| 14                                          | Method of addressing articles published in languages other than English                                                                                                                                                                                                      | 6-8                     |
| 15                                          | Method of handling abstracts and unpublished studies                                                                                                                                                                                                                         | 6-8, Supplement         |
| 16                                          | Description of any contact with authors                                                                                                                                                                                                                                      | 6-8, Supplement         |
| Reporting of methods should include         |                                                                                                                                                                                                                                                                              |                         |
| 17                                          | Description of relevance or appropriateness of studies assembled for assessing the hypothesis to be tested                                                                                                                                                                   | 9-12                    |
| 18                                          | Rationale for the selection and coding of data (eg, sound clinical principles or convenience)                                                                                                                                                                                | 9-12                    |
| 19                                          | Documentation of how data were classified and coded (eg, multiple raters, blinding and interrater reliability)                                                                                                                                                               | 9-12                    |
| 20                                          | Assessment of confounding (eg, comparability of cases and controls in studies where appropriate)                                                                                                                                                                             | 9-12                    |
| 21                                          | Assessment of study quality, including blinding of quality assessors, stratification or regression on possible predictors of study results                                                                                                                                   | 9-12                    |
| 22                                          | Assessment of heterogeneity                                                                                                                                                                                                                                                  | 9-12                    |
| 23                                          | Description of statistical methods (eg, complete description of fixed or random effects models, justification of whether the chosen models account for predictors of study results, dose-response models, or cumulative meta-analysis) in sufficient detail to be replicated | 9-12                    |
| 24                                          | Provision of appropriate tables and graphics                                                                                                                                                                                                                                 | 9-12, Supplement        |
| Reporting of results should include         |                                                                                                                                                                                                                                                                              |                         |
| 25                                          | Graphic summarizing individual study estimates and overall estimate                                                                                                                                                                                                          | Fig 1-3, Supplement     |
| 26                                          | Table giving descriptive information for each study included                                                                                                                                                                                                                 | Tables 1, 2, Supplement |
| 27                                          | Results of sensitivity testing (eg, subgroup analysis)                                                                                                                                                                                                                       | 9-12                    |
| 28                                          | Indication of statistical uncertainty of findings                                                                                                                                                                                                                            | 9-12                    |

| Item No                                 | Recommendation                                                                                                            | Reported on Page No |
|-----------------------------------------|---------------------------------------------------------------------------------------------------------------------------|---------------------|
| Reporting of discussion should include  |                                                                                                                           |                     |
| 29                                      | Quantitative assessment of bias (eg, publication bias)                                                                    | 9-12                |
| 30                                      | Justification for exclusion (eg, exclusion of non-English language citations)                                             | 9-12                |
| 31                                      | Assessment of quality of included studies                                                                                 | 9-12                |
| Reporting of conclusions should include |                                                                                                                           |                     |
| 32                                      | Consideration of alternative explanations for observed results                                                            | 13-17               |
| 33                                      | Generalization of the conclusions (ie, appropriate for the data presented and within the domain of the literature review) | 13-17               |
| 34                                      | Guidelines for future research                                                                                            | 13-17               |
| 35                                      | Disclosure of funding source                                                                                              | 18                  |

From: Stroup DF, Berlin JA, Morton SC, et al, for the Meta-analysis Of Observational Studies in Epidemiology (MOOSE) Group. Meta-analysis of Observational Studies in Epidemiology. A Proposal for Reporting. *JAMA*. 2000;283(15):2008-2012. doi: 10.1001/jama.283.15.2008.

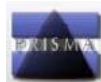

## PRISMA 2020 Checklist

| Section and Topic             | Item # | Checklist item                                                                                                                                                                                                                                                                                       | Location where item is reported |
|-------------------------------|--------|------------------------------------------------------------------------------------------------------------------------------------------------------------------------------------------------------------------------------------------------------------------------------------------------------|---------------------------------|
| <b>TITLE</b>                  |        |                                                                                                                                                                                                                                                                                                      |                                 |
| Title                         | 1      | Identify the report as a systematic review.                                                                                                                                                                                                                                                          | p1                              |
| <b>ABSTRACT</b>               |        |                                                                                                                                                                                                                                                                                                      |                                 |
| Abstract                      | 2      | See the PRISMA 2020 for Abstracts checklist.                                                                                                                                                                                                                                                         | p3-4                            |
| <b>INTRODUCTION</b>           |        |                                                                                                                                                                                                                                                                                                      |                                 |
| Rationale                     | 3      | Describe the rationale for the review in the context of existing knowledge.                                                                                                                                                                                                                          | p5-6                            |
| Objectives                    | 4      | Provide an explicit statement of the objective(s) or question(s) the review addresses.                                                                                                                                                                                                               | p5-6                            |
| <b>METHODS</b>                |        |                                                                                                                                                                                                                                                                                                      |                                 |
| Eligibility criteria          | 5      | Specify the inclusion and exclusion criteria for the review and how studies were grouped for the syntheses.                                                                                                                                                                                          | p8, Supplementary p15           |
| Information sources           | 6      | Specify all databases, registers, websites, organisations, reference lists and other sources searched or consulted to identify studies. Specify the date when each source was last searched or consulted.                                                                                            | p7                              |
| Search strategy               | 7      | Present the full search strategies for all databases, registers and websites, including any filters and limits used.                                                                                                                                                                                 | Supplementary p2                |
| Selection process             | 8      | Specify the methods used to decide whether a study met the inclusion criteria of the review, including how many reviewers screened each record and each report retrieved, whether they worked independently, and if applicable, details of automation tools used in the process.                     | p8                              |
| Data collection process       | 9      | Specify the methods used to collect data from reports, including how many reviewers collected data from each report, whether they worked independently, any processes for obtaining or confirming data from study investigators, and if applicable, details of automation tools used in the process. | p8                              |
| Data items                    | 10a    | List and define all outcomes for which data were sought. Specify whether all results that were compatible with each outcome domain in each study were sought (e.g. for all measures, time points, analyses), and if not, the methods used to decide which results to collect.                        | Supplementary p15               |
|                               | 10b    | List and define all other variables for which data were sought (e.g. participant and intervention characteristics, funding sources). Describe any assumptions made about any missing or unclear information.                                                                                         | p8 and Supplementary p15        |
| Study risk of bias assessment | 11     | Specify the methods used to assess risk of bias in the included studies, including details of the tool(s) used, how many reviewers assessed each study and whether they worked independently, and if applicable, details of automation tools used in the process.                                    | p9                              |
| Effect measures               | 12     | Specify for each outcome the effect measure(s) (e.g. risk ratio, mean difference) used in the synthesis or presentation of results.                                                                                                                                                                  | p8-9                            |
| Synthesis methods             | 13a    | Describe the processes used to decide which studies were eligible for each synthesis (e.g. tabulating the study intervention characteristics and comparing against the planned groups for each synthesis (item #5)).                                                                                 | p8-9                            |
|                               | 13b    | Describe any methods required to prepare the data for presentation or synthesis, such as handling of missing summary statistics, or data conversions.                                                                                                                                                | p 8-9<br>Supplementary p2       |
|                               | 13c    | Describe any methods used to tabulate or visually display results of individual studies and syntheses.                                                                                                                                                                                               | p 8-9<br>Supplementary p2       |
|                               | 13d    | Describe any methods used to synthesize results and provide a rationale for the choice(s). If meta-analysis was performed, describe the model(s), method(s) to identify the presence and extent of statistical heterogeneity, and software package(s) used.                                          | p 8-9<br>Supplementary p2       |
|                               | 13e    | Describe any methods used to explore possible causes of heterogeneity among study results (e.g. subgroup analysis, meta-regression).                                                                                                                                                                 | p 8-9<br>Supplementary p2       |
|                               | 13f    | Describe any sensitivity analyses conducted to assess robustness of the synthesized results.                                                                                                                                                                                                         | NA                              |
| Reporting bias assessment     | 14     | Describe any methods used to assess risk of bias due to missing results in a synthesis (arising from reporting biases).                                                                                                                                                                              | p9                              |
| Certainty assessment          | 15     | Describe any methods used to assess certainty (or confidence) in the body of evidence for an outcome.                                                                                                                                                                                                | NA                              |



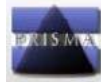

## PRISMA 2020 Checklist

| Section and Topic                              | Item # | Checklist item                                                                                                                                                                                                                                                                       | Location where item is reported        |
|------------------------------------------------|--------|--------------------------------------------------------------------------------------------------------------------------------------------------------------------------------------------------------------------------------------------------------------------------------------|----------------------------------------|
| <b>RESULTS</b>                                 |        |                                                                                                                                                                                                                                                                                      |                                        |
| Study selection                                | 16a    | Describe the results of the search and selection process, from the number of records identified in the search to the number of studies included in the review, ideally using a flow diagram.                                                                                         | Figure 1, p10                          |
|                                                | 16b    | Cite studies that might appear to meet the inclusion criteria, but which were excluded, and explain why they were excluded.                                                                                                                                                          | Supplementary p23-3                    |
| Study characteristics                          | 17     | Cite each included study and present its characteristics.                                                                                                                                                                                                                            | p10-11, Table 1, 2                     |
| Risk of bias in studies                        | 18     | Present assessments of risk of bias for each included study.                                                                                                                                                                                                                         | p15, Supplementary eTable 5            |
| Results of individual studies                  | 19     | For all outcomes, present, for each study: (a) summary statistics for each group (where appropriate) and (b) an effect estimate and its precision (e.g. confidence/credible interval), ideally using structured tables or plots.                                                     | p15, Supplementary eTable 5            |
| Results of syntheses                           | 20a    | For each synthesis, briefly summarise the characteristics and risk of bias among contributing studies.                                                                                                                                                                               | Figure 2, 3, Supplementary eFigure 1-5 |
|                                                | 20b    | Present results of all statistical syntheses conducted. If meta-analysis was done, present for each the summary estimate and its precision (e.g. confidence/credible interval) and measures of statistical heterogeneity. If comparing groups, describe the direction of the effect. | p 11-13<br>Supplementary p3            |
|                                                | 20c    | Present results of all investigations of possible causes of heterogeneity among study results.                                                                                                                                                                                       | p 11-13<br>Supplementary p3            |
|                                                | 20d    | Present results of all sensitivity analyses conducted to assess the robustness of the synthesized results.                                                                                                                                                                           | NA                                     |
| Reporting biases                               | 21     | Present assessments of risk of bias due to missing results (arising from reporting biases) for each synthesis assessed.                                                                                                                                                              | Supplementary eTable 5                 |
| Certainty of evidence                          | 22     | Present assessments of certainty (or confidence) in the body of evidence for each outcome assessed.                                                                                                                                                                                  | p 11-13<br>Supplementary p3            |
| <b>DISCUSSION</b>                              |        |                                                                                                                                                                                                                                                                                      |                                        |
| Discussion                                     | 23a    | Provide a general interpretation of the results in the context of other evidence.                                                                                                                                                                                                    | p14                                    |
|                                                | 23b    | Discuss any limitations of the evidence included in the review.                                                                                                                                                                                                                      | p15-16                                 |
|                                                | 23c    | Discuss any limitations of the review processes used.                                                                                                                                                                                                                                | p16                                    |
|                                                | 23d    | Discuss implications of the results for practice, policy, and future research.                                                                                                                                                                                                       | p17                                    |
| <b>OTHER INFORMATION</b>                       |        |                                                                                                                                                                                                                                                                                      |                                        |
| Registration and protocol                      | 24a    | Provide registration information for the review, including register name and registration number, or state that the review was not registered.                                                                                                                                       | p7                                     |
|                                                | 24b    | Indicate where the review protocol can be accessed, or state that a protocol was not prepared.                                                                                                                                                                                       | p7                                     |
|                                                | 24c    | Describe and explain any amendments to information provided at registration or in the protocol.                                                                                                                                                                                      | NA                                     |
| Support                                        | 25     | Describe sources of financial or non-financial support for the review, and the role of the funders or sponsors in the review.                                                                                                                                                        | p18                                    |
| Competing interests                            | 26     | Declare any competing interests of review authors.                                                                                                                                                                                                                                   | p18                                    |
| Availability of data, code and other materials | 27     | Report which of the following are publicly available and where they can be found: template data collection forms; data extracted from included studies; data used for all analyses; analytic code; any other materials used in the review.                                           |                                        |

From: Page MJ, McKenzie JE, Bossuyt PM, Boutron I, Hoffmann TC, Mulrow CD, et al. The PRISMA 2020 statement: an updated guideline for reporting systematic reviews. *BMJ* 2021;372:n71. doi: 10.1136/bmj.n71

For peer review only - <http://bmjopen.bmj.com/site/about/guidelines.xhtml>  
For more information, visit: <http://www.prisma-statement.org/>

# BMJ Open

## Diagnostic Reliability in Teledermatology: A Systematic Review and a Meta-Analysis

|                                 |                                                                                                                                                                                                                                                                                                                                                                                                                                                                                                                                                                                                 |
|---------------------------------|-------------------------------------------------------------------------------------------------------------------------------------------------------------------------------------------------------------------------------------------------------------------------------------------------------------------------------------------------------------------------------------------------------------------------------------------------------------------------------------------------------------------------------------------------------------------------------------------------|
| Journal:                        | <i>BMJ Open</i>                                                                                                                                                                                                                                                                                                                                                                                                                                                                                                                                                                                 |
| Manuscript ID                   | bmjopen-2022-068207.R1                                                                                                                                                                                                                                                                                                                                                                                                                                                                                                                                                                          |
| Article Type:                   | Original research                                                                                                                                                                                                                                                                                                                                                                                                                                                                                                                                                                               |
| Date Submitted by the Author:   | 28-Jun-2023                                                                                                                                                                                                                                                                                                                                                                                                                                                                                                                                                                                     |
| Complete List of Authors:       | Bourkas, Adrienn; Queen's University School of Medicine<br>Barone, Natasha; McGill University Montreal, Faculty of Medicine and Health Sciences<br>Bourkas, Matthew; University of Toronto, Department of Biochemistry<br>Mannarino, Matthew; McGill University, Department of Surgery<br>Fraser, Robert; Western University Arthur Labatt Family School of Nursing, Nursing; Swift Medical<br>Lorincz, Amy; Independent researcher<br>Wang, Sheila; McGill University Department of Medicine, Dermatology; Swift Medical<br>Ramirez-GarciaLuna, Jose; McGill University, Department of Surgery |
| <b>Primary Subject Heading</b>: | Dermatology                                                                                                                                                                                                                                                                                                                                                                                                                                                                                                                                                                                     |
| Secondary Subject Heading:      | Health informatics, General practice / Family practice                                                                                                                                                                                                                                                                                                                                                                                                                                                                                                                                          |
| Keywords:                       | Telemedicine < BIOTECHNOLOGY & BIOINFORMATICS, DERMATOLOGY, PRIMARY CARE, Information technology < BIOTECHNOLOGY & BIOINFORMATICS, STATISTICS & RESEARCH METHODS                                                                                                                                                                                                                                                                                                                                                                                                                                |
|                                 |                                                                                                                                                                                                                                                                                                                                                                                                                                                                                                                                                                                                 |

SCHOLARONE™  
Manuscripts





I, the Submitting Author has the right to grant and does grant on behalf of all authors of the Work (as defined in the below author licence), an exclusive licence and/or a non-exclusive licence for contributions from authors who are: i) UK Crown employees; ii) where BMJ has agreed a CC-BY licence shall apply, and/or iii) in accordance with the terms applicable for US Federal Government officers or employees acting as part of their official duties; on a worldwide, perpetual, irrevocable, royalty-free basis to BMJ Publishing Group Ltd ("BMJ") its licensees and where the relevant Journal is co-owned by BMJ to the co-owners of the Journal, to publish the Work in this journal and any other BMJ products and to exploit all rights, as set out in our [licence](#).

The Submitting Author accepts and understands that any supply made under these terms is made by BMJ to the Submitting Author unless you are acting as an employee on behalf of your employer or a postgraduate student of an affiliated institution which is paying any applicable article publishing charge ("APC") for Open Access articles. Where the Submitting Author wishes to make the Work available on an Open Access basis (and intends to pay the relevant APC), the terms of reuse of such Open Access shall be governed by a Creative Commons licence – details of these licences and which [Creative Commons](#) licence will apply to this Work are set out in our licence referred to above.

Other than as permitted in any relevant BMJ Author's Self Archiving Policies, I confirm this Work has not been accepted for publication elsewhere, is not being considered for publication elsewhere and does not duplicate material already published. I confirm all authors consent to publication of this Work and authorise the granting of this licence.

1 **Title:** Diagnostic Reliability in Teledermatology: A Systematic Review and a Meta-Analysis

2  
3  
4  
5  
6  
7  
8 **Authors**

9  
10 Adrienn N. Bourkas\*<sup>1</sup> (MSc), Natasha Barone\*<sup>2</sup> (MD, MSc), Matthew E.C. Bourkas<sup>3</sup> (PhD),  
11  
12 Matthew Mannarino<sup>4</sup> (PhD), Robert D. J. Fraser<sup>5,6</sup> (RN, MN), Amy Lorincz (MSc), Sheila C.  
13  
14 Wang<sup>5,7</sup> (MD, PhD), Jose L. Ramirez-GarciaLuna<sup>4</sup> (MD, PhD)

15  
16  
17 \* Authors contributed equally

18  
19  
20  
21 **Affiliations**

22  
23  
24 <sup>1</sup>Faculty of Health Sciences, Queen's University School of Medicine, Kingston, Ontario, Canada

25  
26 <sup>2</sup>Faculty of Medicine and Health Sciences, McGill University, Montreal, Quebec, Canada

27  
28 <sup>3</sup>Temerty Faculty of Medicine, Department of Biochemistry, University of Toronto, Toronto,  
29  
30 Ontario, Canada

31  
32  
33 <sup>4</sup>Department of Surgery, McGill University, Montreal, Quebec, Canada

34  
35  
36 <sup>5</sup>Swift Medical Inc., Toronto, Ontario, Canada

37  
38 <sup>6</sup>Arthur Labatt Family School of Nursing, Western University, London, Ontario, Canada

39  
40 <sup>7</sup>Department of Medicine, Division of Dermatology, McGill University Health Centre, Montreal,  
41  
42 Quebec, Canada

43  
44  
45  
46  
47 **Corresponding author**

48  
49 Jose L. Ramirez-GarciaLuna, MD, PhD

50  
51 Research Institute-McGill University Health Centre

52  
53  
54 Montreal General Hospital 1650 Cedar Ave, Montreal, Quebec, Canada H3G 1A4

1  
2  
3 24 Tel: 514-934-1934 ext 44522  
4  
5 25 Email: [ramirezgl@gmail.com](mailto:ramirezgl@gmail.com)  
6  
7  
8  
9  
10  
11  
12  
13  
14  
15  
16  
17  
18  
19  
20  
21  
22  
23  
24  
25  
26  
27  
28  
29  
30  
31  
32  
33  
34  
35  
36  
37  
38  
39  
40  
41  
42  
43  
44  
45  
46  
47  
48  
49  
50  
51  
52  
53  
54  
55  
56  
57  
58  
59  
60

For peer review only

## 26 **Abstract**

27 Objectives: To compare teledermatology and face-to-face (F2F) agreement in primary diagnoses  
28 of dermatological conditions.

29 Design: Systematic Review and Meta-Analysis

30 Methods: MEDLINE, Embase, Cochrane Library (Wiley), CINAHL, and medRxiv were  
31 searched between January 2010 and May 2022. Observational studies and randomized clinical  
32 trials that reported percentage agreement or kappa concordance for primary diagnoses between  
33 teledermatology and F2F physicians were included. Titles, abstracts, and full-text articles were  
34 screened in duplicate. From 7,173 citations, 44 articles were included. A random-effects meta-  
35 analysis was conducted to estimate pooled estimates. Primary outcome measures were mean  
36 percentage and kappa concordance for assessing diagnostic matches between teledermatology  
37 and F2F physicians. Secondary outcome measures included the agreement between  
38 teledermatologists, F2F dermatologists, and teledermatology and histopathology results.

39 Results: 44 studies were extracted and reviewed. The pooled agreement rate was 68.9%, and  
40 kappa concordance was 0.67. When dermatologists conducted F2F and teledermatology consults,  
41 the overall diagnostic agreement was significantly higher at 71%, compared to 44% for non-  
42 specialists. Kappa concordance was 0.69 for teledermatologist vs specialist and 0.52 for non-  
43 specialists. Higher diagnostic agreements were also noted with image acquisition training and  
44 digital photography. The agreement rate was 76.4% between teledermatologists, 82.4% between  
45 F2F physicians, and 55.7% between teledermatology and histopathology.

46 Conclusions and Relevance: Teledermatology can be an attractive option particularly in  
47 resource-poor settings. Future efforts should be placed on incorporating image acquisition  
48 training and access to high-quality imaging technologies.

1  
2  
3 49 Registration number: 10.17605/OSF.IO/FJDVG  
4  
5  
6 50  
7

8 51 **Keywords:** teledermatology, dermatology consultations, store-and-forward, telemedicine,  
9  
10 52 remote consultation, dermatology hospitalists  
11  
12 53  
13

14 54 **Article Summary:**

15 55 Strengths and limitations of this study:  
16  
17  
18

- 19 56 ● This is the most comprehensive systematic review and meta-analysis of the topic to date  
20  
21 57 without language restrictions applied.  
22  
23 58 ● Inclusion criteria were broad, including all types of dermatological diseases, imaging  
24  
25 59 technologies, in-person physician specializations (GPs, hospitalists, and dermatologists),  
26  
27 60 and the presence or absence of image acquisition training.  
28  
29 61 ● The article search was limited to 2010 and later due to the recent incorporation of  
30  
31 62 smartphones in teledermatology practices.  
32  
33 63 ● Due to considerable heterogeneity between studies, meta-analysis and synthesis of  
34  
35 64 predictors for accurate diagnoses remotely were limited even after subgrouping.  
36  
37  
38  
39  
40  
41  
42  
43  
44  
45  
46  
47  
48  
49  
50  
51  
52  
53  
54  
55  
56  
57  
58  
59  
60

## 65 Introduction

66 With the emergence of COVID-19, the introduction of virtual consults in healthcare settings,  
67 especially dermatology, has been expanded to allow many patients the opportunity for equitable  
68 access to care when in-person appointments pose a challenge and risk to patients. <sup>1</sup> Different  
69 modalities were introduced to support teledermatology. This involves remote sharing of patient  
70 data, including synchronous video-streaming teledermatology and asynchronous sharing of still  
71 images via emails, or text messages, or store-and-forward teledermatology (SFTD).

72  
73 Although both synchronous and asynchronous approaches have been shown to be cost-effective,  
74 SFTD is particularly popular as it requires fewer resources and less coordination than synchronous  
75 teledermatology. <sup>2 3</sup> With the advent of higher resolution smartphone cameras, relatively minimal  
76 training is required to capture data for remote dermatologists correctly; multiple SFTD studies  
77 opted to provide no training in image capture and still found value in teledermatology. <sup>4 5</sup>

78  
79 There is valid concern over the reliability of teledermatology given the significant variability in  
80 diagnostic accuracy predicted across pre-pandemic research. <sup>6</sup> This is expected given the lack of  
81 standardization across studies and the potential for confounders across teledermatology  
82 methodologies and applications, e.g., level of training or skin lesion type. This variability in  
83 approach may benefit from an increased demand, which could provide greater impetus to optimize  
84 and standardize teledermatology.

85  
86 To our knowledge, this is the first and most inclusive meta-analysis (MA) that compares  
87 teledermatology consults to face-to-face (F2F) that looked at all relevant studies without overly

1  
2  
3 88 exclusive inclusion criteria. The primary objective of this study was to compare the reliability of  
4  
5 89 teledermatology diagnoses to F2F consults, as determined by Cohen's kappa interrater agreement  
6  
7  
8 90 and total agreement rates. Teledermatology can assume important roles as a routine complement  
9  
10 91 to primary care and an alternate route to the typical in-person referrals. Consequently, we wanted  
11  
12 92 to determine agreement for teledermatology and all F2F consults, teledermatology and F2F  
13  
14 93 primary care consults, and finally teledermatology and F2F dermatologist consults, which would  
15  
16 94 arguably best capture the limitations introduced by the change in medium from F2F to  
17  
18  
19 95 teledermatology.  
20

21 96  
22  
23  
24 97 Additional subset analyses were performed to control for potential confounders (e.g.,  
25  
26 98 inflammatory vs. malignant, staff training for image acquisition, teledermoscopy, and smartphone  
27  
28 99 vs digital cameras) introduced by the heterogenous methodology. The secondary objectives sought  
29  
30  
31 100 to determine the agreement rate within teledermatology diagnoses and F2F consults to provide an  
32  
33 101 idea of each medium's consistency, and provide the best estimate of accuracy for the agreement  
34  
35 102 rate between teledermatology and histopathology.  
36  
37  
38  
39  
40  
41  
42  
43  
44  
45  
46  
47  
48  
49  
50  
51  
52  
53  
54  
55  
56  
57  
58  
59  
60

## 103 **Methods**

104 This study was performed in accordance with the Preferred Reported Items for Systematic Reviews  
105 and Meta-Analyses (PRISMA) guidelines.

### 107 Protocol Registration

108 Prior to the conduct of this review, a protocol which adhered to the PRISMA-protocols (i.e.,  
109 PRISMA-P) guidelines was developed and then registered on Open Science Framework (OSF).

110 Access: <https://osf.io/fjdvg>.<sup>7</sup>

### 112 Search Strategy

113 A comprehensive search of major bibliographic databases, MEDLINE, Embase, Cochrane Library  
114 (Wiley), CINAHL, and medRxiv was performed in August 2021. MEDLINE was searched again  
115 between August 2021 and May 2022 to screen any new articles published after our protocol was  
116 registered. The search strategy was developed by a medical librarian at Queen's University  
117 (Kingston, ON). Please see the supplementary appendix for additional information on the search  
118 strategy.

119  
120 No restrictions were placed on the language or status of the publications. Search results were  
121 limited to studies published between January 2010 and May 2022 due to the novelty of  
122 incorporating smartphones in teledermatology remote consultations.<sup>8</sup> The International  
123 Prospective Register of Systematic Reviews (PROSPERO) and OSF were searched up to May  
124 2022 for relevant ongoing systematic reviews using the terms 'telemedicine,' 'teledermatology,'



1  
2  
3 125 'dermatology,' 'diagnostic accuracy,' and 'diagnostic concordance.' Reference lists of included  
4  
5 126 studies were screened to identify additional studies not captured in the search.  
6  
7  
8 127

9  
10 128 Eligibility Criteria

11  
12 129 Studies evaluating the diagnostic reliability of teledermatology that reported on patients with  
13  
14 130 dermatological conditions assessed by a clinician using asynchronous or synchronous telemedicine  
15  
16 131 systems were included. All articles were required to compare tele- to F2F diagnoses conducted by  
17  
18 132 a physician. Exclusion criteria encompassed survey articles, feasibility studies, non-  
19  
20 133 dermatological telemedicine studies, cost-effectiveness studies, editorials, review articles, studies  
21  
22 134 using teledermatology as the reference standard, studies comparing only dermatoscopic images  
23  
24 135 without clinical images, and studies where patients captured their own photographs. The latter was  
25  
26 136 excluded to ensure consistent image quality, enabling a more accurate comparison of diagnostic  
27  
28 137 reliability between tele- and F2F methods. Included articles are summarized in **eTable 1** in the  
29  
30 138 supplementary appendix. Inclusion and exclusion criteria are summarized in **eTable 2**, available  
31  
32 139 in the supplementary appendix.  
33  
34  
35  
36  
37  
38 140

39  
40 141 Data Selection & Extraction

41  
42 142 Following the removal of duplicated citations, the titles and abstracts were screened. Following  
43  
44 143 this step, a full-text assessment was conducted. At both stages, two reviewers performed screening  
45  
46 144 independently [AB and NB]. Any disagreements were resolved through consensus by the two  
47  
48 145 reviewers and when necessary, through discussion with a third reviewer [JLRG].  
49  
50  
51  
52 146

1  
2  
3 147 A data collection form was created on the *Covidence* website and piloted by two reviewers [AB,  
4  
5 148 NB]. Three additional reviewers assisted with data extraction [JLRG, MB, MM]. Two reviewers  
6  
7 149 were assigned to each paper. One reviewer extracted all characteristics of the included literature,  
8  
9 150 and the second reviewer validated the characteristics for accuracy. Any disagreements were  
10  
11 151 resolved by consensus. In the supplementary appendix, **eTable 3** summarizes the information  
12  
13 152 extracted from full-text articles.  
14  
15  
16  
17 153

### 19 154 Data Synthesis

21 155 This meta-analysis assessed the effectiveness of SFTD technologies and live video conferencing  
22  
23 156 in diagnosing skin conditions. Outcomes regarding complete diagnostic percentage agreement  
24  
25 157 rates and Cohen's kappa concordance were evaluated separately, with some studies being part of  
26  
27 158 both analyses if they reported both variables. The patient, intervention type, lesion, and geographic  
28  
29 159 characteristics were summarized qualitatively. Please see the supplementary appendix and **eTable**  
30  
31 160 **4** for more details on data synthesis and nomenclature for each study grouping.  
32  
33  
34  
35  
36  
37  
38  
39

### 162 Risk of Bias

40 163 Three reviewers [AB, NB, MB] completed the risk of bias assessment; all studies were  
41  
42 164 independently reviewed. Version 2 of the Cochrane risk-of-bias tool for randomized trials (RoB  
43  
44 165 2) was used to assess the risk of bias in three randomized trials.<sup>9-11</sup> RoB 2 is structured into a fixed  
45  
46 166 set of domains of bias, focusing on different aspects of trial design, conduct, and reporting.<sup>12</sup> The  
47  
48 167 Quality Assessment of Diagnostic Assessment of Diagnostic Accuracy (2<sup>nd</sup> Edition, QUADAS-2)  
49  
50 168 was used to assess the risk of bias. Uncertain risk of bias was assigned to studies with insufficient  
51  
52  
53  
54  
55  
56  
57  
58  
59  
60

1  
2  
3 169 information except for studies that were likely to be biased due to missing data. In the latter case,  
4  
5 170 a high risk of bias was assigned.  
6

7  
8 171

9  
10 172 Synthesis of Results

11  
12 173 Statistical analysis was performed using the dmetar package in R v.4.0.1 (R Foundation for  
13  
14 174 Statistical Computing, 2022). Agreement rates and Cohen's kappa concordances for unique study  
15  
16 175 groupings were treated as individual and independent values. For the percentage of agreement,  
17  
18 176 meta-analyses were conducted using the aggregated data, and proportions were calculated with the  
19  
20 177 corresponding 95 percent confidence intervals (CI). Point-biserial correlations were utilized to  
21  
22 178 calculate pooled kappa values. Statistical heterogeneity was investigated using the  $I^2$  index and the  
23  
24 179  $\tau^2$  statistic, leading to the use of a random-effects model for overall complications with a logit  
25  
26 180 transformation due to the high degree of heterogeneity. Possible sources of heterogeneity were  
27  
28 181 explored through sub-group analysis, and confounding factors were controlled using meta-  
29  
30 182 regression. A random-effects model, as proposed by DerSimonian and Laird, was chosen as the  
31  
32 183 primary method to estimate all pooled estimates. Further details on the statistical analysis can be  
33  
34 184 found in the supplementary appendix.  
35  
36  
37  
38  
39

40 185

41  
42 186 Patient and Public Involvement

43  
44 187 Patients or the public were not involved in our research's design, conduct, reporting, or  
45  
46 188 dissemination plans.  
47  
48  
49  
50  
51  
52  
53  
54  
55  
56  
57  
58  
59  
60

## 189 **Results**

190 A total of 7,173 studies were screened for eligibility of which 44 were included in this study. Of  
191 these, 40 studies reported diagnostic agreement rates <sup>4 5 9-11 13-47</sup> and 21 studies reported kappa  
192 concordance. <sup>5 9 13 14 19 22 25 28-33 35-37 48-52</sup> Further details are provided in the PRISMA diagram in  
193 **Figure 1**. The complete list of excluded studies can be found in the supplementary appendix,  
194 **eTable 5**.

### 196 Study and patient characteristics

197 **eTable 1** summarizes the study and participant characteristics for the 44 included papers. Forty of  
198 the included studies were observational, of which 31 were prospective, nine were retrospective.  
199 One study was ambispective. Three studies were randomized controlled trials and one study was  
200 a quasi-randomized trial. Studies selected for the review included a total of 52,075 patients (Range:  
201 26 to 24,210 patients). Some patients had multiple lesions and the total number of lesions included  
202 in the study was 57,222 (Range: 26 to 27,519 lesions).

203  
204 The mean age reported in 27 (61%) studies was  $54.78 \pm 15.69$  years (Range: 0 to 100 years old).  
205 Thirty-four (77%) studies reported participant gender, with a mean of 57% females (Range: 3.2%  
206 to 74%). Only 13 (29%) studies reported information on Fitzpatrick skin types, ethnicity, or race.  
207 Twenty-eight studies (64%) included in this analysis were inclusive of all types of dermatoses, 13  
208 (29%) studies looked specifically at suspicious lesions, and three (7%) studies excluded skin  
209 cancers completely.

210  
211 Diagnostic reliability of teledermatology when compared to F2F (specialist and non-specialist)  
212 evaluation

213 We assessed the diagnostic reliability of teledermatology compared to F2F evaluations by  
214 analyzing diagnostic agreement rates and concordance. The overall diagnostic agreement rate  
215 ranged from 13.9% to 98.0% (mean 68.9%, CI 64.4% to 73.1%), with a concordance that ranged  
216 from 0.21 to 0.96 (mean 0.67, CI 0.60 to 0.74). See **eFigure 1** and the supplementary appendix  
217 for further details.

218  
219 **Sub-group analyses**

220  
221 Diagnostic agreement between teledermatologist and teledermatologist, F2F and F2F physicians,  
222 and teledermatology and histopathology

223 See supplementary appendix and **eFigure 2** for further details.

224  
225 Diagnostic reliability of teledermatologist vs F2F specialist and non-specialist

226 See supplementary appendix and **eFigure 3** for further details.

227  
228 Diagnostic reliability of teledermatology vs F2F by training provided for image acquisition

229 Twenty studies with 37 unique comparisons explicitly provided training to those in charge of  
230 image acquisition shown in **Figure 2**.<sup>9-11 14-16 19 20 23 26 29 32 35-41 43 44</sup> The mean agreement rate  
231 between teledermatology and F2F physicians in these studies was 75.9% (CI 74.4% to 77.27%),  
232 significantly higher than the 62.1% (CI 60.5% to 63.7%) observed when no training was provided

233 (p = 0.033, heterogeneity: I<sup>2</sup> = 98%). Concordance values were also higher when training was  
234 provided (mean 0.77, CI 0.66-0.84) compared to when no training was provided (mean 0.60, CI  
235 0.49-0.69) (p = 0.01, I<sup>2</sup>=98%).

### 237 Diagnostic reliability of teledermatology vs F2F by type of technology used for image acquisition

238 Approximately half of the studies with 41 unique comparisons that compared Teledermatologists  
239 with F2F physicians used digital cameras for image acquisition. Eighteen studies comparing F2F  
240 and teledermatology agreement rates with 26 unique comparisons reported the use of smartphones  
241 and tablets for image acquisition. **Figure 3** shows that the mean percentage agreement rate for  
242 digital cameras was 71.7% (CI 70.3% to 73.1% compared to 59.8% (CI 57.2% to 62.3%) for  
243 smartphones or tablets. The higher agreement rate with digital photography was statistically  
244 significant (p = 0.029, heterogeneity: I<sup>2</sup>=98%). The concordance values for digital photography  
245 were reported for twelve studies with a mean of 0.70 (CI 0.61 to 0.76). Concordance values for  
246 smartphone or tablet technologies were reported for eight studies with a mean of 0.62 (CI 0.38 to  
247 0.78). The higher concordance with digital photography was statistically significant (p = 0.003,  
248 heterogeneity: I<sup>2</sup>=100%).

### 250 Other sub-group analyses

251 No statistically significant patterns could be identified with the inclusion of teledermoscopy in  
252 addition to clinical images (**eFigure 4**), lesion type (**eFigure 5**), grouping studies as pre- or post-  
253 pandemic (figure not shown), or risk of bias (figure not shown). Please see the supplementary  
254 appendix for further details.

1  
2  
3 2554  
5 256 **Quality assessment**6  
7  
8 257 The quality assessment results for risk of bias and applicability in individual studies are displayed  
9  
10 258 in the supplementary appendix and **eTable 6**.11  
12 25913  
14  
15 260 **Discussion:**16  
17 261 To our knowledge, this study constitutes the most extensive systematic review and meta-analysis  
18  
19 262 on tele dermatology, including 44 studies across four languages.20  
21 26322  
23  
24 264 Our sub-group analyses revealed that agreement rates between tele dermatology consultations and  
25  
26 265 F2F physicians were significantly higher when dermatologists conducted in-person assessments  
27  
28 266 compared to non-specialists. This finding suggests that tele dermatology may be more beneficial  
29  
30 267 in supplementing primary care than specialist care, as lower concordance with non-specialists  
31  
32 268 indicates reduced reference test accuracy. Although we did not directly assess the impact of  
33  
34 269 consulting tele dermatologists on non-specialist accuracy, the included studies report high levels of  
35  
36 270 non-specialist satisfaction with the teleconsultation process. In fact, 96% of non-specialists agreed  
37  
38 271 that they learned about the dermatologic diagnosis, and 100% agreed that it helped patient care.<sup>23</sup>  
39  
40 272 These results are consistent with prior research attributing high provider satisfaction to streamlined  
41  
42 273 workflows, effective communication, and fast turnaround times in tele dermatology.<sup>2 53</sup>43  
44  
45 27446  
47  
48  
49 275 The study emphasizes the importance of standardized training on image acquisition in improving  
50  
51 276 agreement rates between in-person and remote care. Additionally, digital photography was linked  
52  
53 277 to increased agreement rates, potentially due to enhanced image resolution and experienced staff  
54  
55  
56  
57  
58  
59

1  
2  
3 278 conducting virtual consultations using standardized procedures. This suggests a crucial need for  
4  
5 279 comprehensive training in image acquisition, highlighting the importance of equipping primary  
6  
7 280 care providers supporting telehealth delivery with high-quality cameras and the latest smartphone  
8  
9  
10 281 models.<sup>24 54 55</sup>

11  
12 282  
13  
14 283 Assessing agreement on the management plan is crucial in teledermatology as it serves as a triage  
15  
16 284 tool for distinguishing mild/benign cases from severe/malignant/uncertain cases. Ensuring  
17  
18 285 concordance in the management plan between telemedicine and face-to-face consultations is vital  
19  
20 286 for optimizing patient care. Future research should explore the consistency of treatment  
21  
22 287 recommendations and interventions between telemedicine and in-person consultations to further  
23  
24 288 enhance the evaluation of telemedicine's effectiveness in guiding appropriate patient management.  
25  
26  
27  
28  
29

30  
31 290 Pathological assessment of skin lesions is the cornerstone of skin cancer diagnosis. This meta-  
32  
33 291 analysis found a 55.7% (CI 53.0% to 58.4%) agreement rate between teledermatology and  
34  
35 292 histopathology. This low agreement rate reflects all skin biopsies and specific diagnostic accuracy  
36  
37 293 rates could not be calculated by lesion type due to the small number of studies that reported this  
38  
39 294 value. Through sub-group analyses, we were able to compare cancerous and non-cancerous  
40  
41 295 lesions; slightly higher concordance was seen with skin cancers compared to studies that also  
42  
43 296 included non-suspicious lesions like dermatitis and psoriasis. However, the data was too  
44  
45 297 heterogeneous for any significant conclusions. We also looked at the use of teledermoscopy,  
46  
47 298 another technique that could help improve the diagnostic accuracy of teledermatology for  
48  
49 299 suspicious lesions, but no significant trends could be identified. These findings reflected the results  
50  
51  
52 300 of a 2016 systematic review on teledermatology.<sup>6</sup>  
53  
54  
55  
56  
57  
58  
59



1  
2  
3 301  
4  
5 302 Many teledermoscopy studies grouped statistics from lesions analyzed with and without  
6  
7 303 dermoscopy, preventing the assessment of the dermatoscope's incremental contributions without  
8  
9 304 the influence of potentially less accurate, dermatoscope-free analysis. Supporting this explanation,  
10  
11 305 the three teledermoscopy studies focused on cancer lesions demonstrated greater concordance rates  
12  
13 306 than the teledermoscopy studies targeting broader lesions. One study identified agreement rates  
14  
15 307 between teledermatology and F2F dermatology of 92.3% (24/26) and between teledermatology  
16  
17 308 and histopathology of 66.7% (17/26), both above our identified median.<sup>45</sup> Another study found an  
18  
19 309 agreement rate of 90% (37/41) when targeting pigmented lesions, although the rate may have been  
20  
21 310 inflated due to recall bias introduced by having the same dermatologist perform teledermatology  
22  
23 311 and F2F consults.<sup>16</sup> Finally, one study diagnosed keratotic lesions in sun-exposed areas, finding a  
24  
25 312 high agreement rate of 92% (915/1000).<sup>37</sup> However, this study also risked bias from its  
26  
27 313 experimental design, which excluded lesions with poor image quality. This fails to recapitulate the  
28  
29 314 complexities of practical teledermatology, which must contend with potentially difficult image  
30  
31 315 acquisition.

32  
33 316  
34  
35 317 The 68.9% (CI 64.4% to 73.05%) combined agreement rate between teledermatology and F2F is  
36  
37 318 lower than the agreement rates outlined in a recent review.<sup>56</sup> This suggests our greater sample size  
38  
39 319 introduces more studies with poor agreement, which may better reflect the reality of adopting  
40  
41 320 teledermatology at a larger scale and signal risk from a lack of standardization.<sup>55</sup> Our date cut-off  
42  
43 321 of 2010 means our dataset has little overlap with existing reviews, and more heavily features new  
44  
45 322 relevant technologies like smartphone apps for image acquisition.<sup>6 57</sup> The most recent MA<sup>57</sup> on  
46  
47  
48  
49  
50  
51  
52  
53  
54  
55  
56  
57  
58  
59

1  
2  
3 323 teledermatology limited its dataset to studies with multiple teledermatology and F2F consults and  
4  
5 324 variably choosing to filter low-frequency diagnoses from certain studies.<sup>46</sup>  
6  
7  
8 325

9  
10 326 We acknowledge several potential limitations. The heterogeneity of the data, though at first glance  
11  
12 327 might limit generalizability, enhances the adaptability and applicability of teledermatology across  
13  
14 328 diverse real-world contexts. Challenges exist due to the absence of stratification by study design  
15  
16 329 and a limited number of randomized controlled trials. Nevertheless, our findings emphasize the  
17  
18 330 critical importance of standardized processes for effective teledermatology, such as training in  
19  
20 331 image acquisition, reporting guidelines, and addressing privacy concerns. Our study reveals a  
21  
22 332 greater degree of heterogeneity compared to previous meta-analyses, reflecting real-world  
23  
24 333 application and clinical practice, bolstering the robustness of our conclusions. We advocate for a  
25  
26 334 nuanced interpretation when generalizing these findings across all settings, recognizing the  
27  
28 335 demographic and technological diversity in our sample as an asset. While our attempts to filter  
29  
30 336 biased studies didn't yield significant improvements to our meta-analysis model, we are mindful  
31  
32 337 of the potential risk of publication bias in our review.  
33  
34  
35  
36  
37  
38  
39

40 339 Furthermore, our study only included a limited number of live video conferencing studies,<sup>11 24 46</sup>  
41  
42 340 and our ability to draw meaningful conclusions regarding the differences between live video  
43  
44 341 conferencing and SFTD methods is therefore limited. A recent study by Duong et al. demonstrated  
45  
46 342 that live video conferencing can significantly contribute to diagnosis in teledermatology by  
47  
48 343 improving the quality of collected information and accuracy of the patient's status evaluation.<sup>24</sup>  
49  
50 344 The study found that videoconferencing significantly improved the diagnostic performance in  
51  
52  
53  
54  
55  
56  
57  
58  
59  
60

1  
2  
3 345 68.7% of cases. While these results are promising, further research is needed to explore the  
4  
5 346 potential differences between clinical images and live video conferencing.  
6  
7

8 347  
9  
10 348 In addition, our search was limited to published literature and may have missed relevant studies in  
11  
12 349 the grey literature and reports from low- and middle-income countries. Nonetheless, the variability  
13  
14 350 across providers and settings underlines the need for a standardized framework to employ and  
15  
16 351 assess teledermatologists. Future research is needed to explore the differences between these  
17  
18 352 methods and other potential factors that may impact the efficacy of teledermatology, particularly  
19  
20 353 in low- and middle-income countries. We acknowledge these limitations and encourage further  
21  
22 354 research to address these gaps in the literature.  
23  
24  
25

26 355  
27  
28 356 Current trends suggest that teledermatology will continue to expand, there have been many recent  
29  
30 357 studies examining its accuracy without the design considerations necessary to allow comparisons  
31  
32 358 beyond siloed investigations.<sup>1</sup> The implementation of evidence-informed processes is critical to  
33  
34 359 the success of teledermatology services, and the accurate assessment of teledermatology will be  
35  
36 360 required to assess which contexts it should be employed in, e.g., suspected malignancy vs.  
37  
38 361 erythema.  
39  
40  
41

42 362  
43  
44 363 While acknowledging the significant potential of artificial intelligence (AI) in enhancing  
45  
46 364 teledermatology, particularly in areas like image recognition and diagnosis, it is crucial to note that  
47  
48 365 our current study does not incorporate these aspects. The impact of AI on teledermatology, while  
49  
50 366 promising, introduces an additional layer of complexity, necessitating a dedicated, separate  
51  
52 367 investigation beyond the scope of our current study.  
53  
54  
55  
56  
57  
58  
59  
60

1  
2  
3 368  
4  
5 369 The factors targeted by our sub-analysis are undoubtedly important to standardize with best  
6  
7  
8 370 practices requiring the inclusion of primary care provider training in image acquisition, explicitly  
9  
10 371 outlined conditions where dermatoscope attachments are required, and standardized reporting with  
11  
12 372 a lesion's anatomical site, size, distribution, morphology, and colour. Additional guidelines for  
13  
14 373 data reporting could be designed with a mind to future research goals, e.g., the inclusion of  
15  
16 374 Fitzpatrick grading to identify gaps in medical care. Finally, both clinical and research guidelines  
17  
18 375 must address privacy concerns, as integrating EMR and sharing of patient images or videos  
19  
20  
21 376 presents potential vulnerabilities.  
22  
23  
24  
25  
26  
27  
28  
29  
30  
31  
32  
33  
34  
35  
36  
37  
38  
39  
40  
41  
42  
43  
44  
45  
46  
47  
48  
49  
50  
51  
52  
53  
54  
55  
56  
57  
58  
59  
60

1  
2  
3 377 **Conclusion:**  
4

5 378 This meta-analysis indicates that diagnostic agreement between remote and in-person  
6  
7 379 dermatologists is acceptable in select conditions (i.e., when training for image acquisition is  
8  
9 provided and technologies for high-quality images are used). Telemedicine adoption rates are  
10 380 accelerating globally, and teledermatology must be considered for enhanced accessibility,  
11  
12 381 flexibility, reduced costs, and safer environments it can provide patients.  
13  
14 382

15  
16  
17 383 The results of this meta-analysis represent significant evidence to indicate the suitability of  
18  
19 384 teledermatology for remote care, particularly as a complement to primary care, where it can serve  
20  
21 385 as an intermediate step before F2F specialist consultations. Furthermore, the categorization of  
22  
23 386 diagnostic concordance highlights important factors to further improve diagnostic accuracy.  
24  
25 387 Additionally, it highlights the lack of standardization in teledermatology studies, calling for greater  
26  
27 388 structure in clinical practice and conducting primary research.  
28  
29

30  
31 389  
32  
33 390 **Acknowledgements:**  
34

35 391 The authors would like to acknowledge Heba Tallah Mohammed affiliated with Swift Medical for  
36  
37 392 reviewing the manuscript and adding their valuable insight. The search strategies were developed  
38  
39 393 with Abdul Kareem Pullattayil (AKP), a health science librarian at Bracken Health Sciences  
40  
41 394 Library Botterell Hall at Queen's University.  
42  
43

44 395  
45  
46  
47 396 **Author Contributions:**  
48

49 397 JLRG is the guarantor of the review and supervised study design. JLRG also contributed to data  
50  
51 398 analysis and provided statistical expertise. AB and NB oversaw study design, data collection,  
52  
53 399 data analysis, and original draft preparation. AB designed the search strategy with the guidance  
54  
55  
56  
57  
58  
59

1  
2  
3 400 of the medical librarian, AKP. AB, NB, MB, and MM participated in the abstract and full-text  
4  
5 401 screen, data extraction, and risk of bias assessment. RDJF, AL, and SCW contributed to the draft  
6  
7 402 review and editing. All authors read, provided feedback and approved the final manuscript.  
8  
9

10 403

11  
12 404 **Funding:**

13  
14 405 This work was supported by the Digital Technology Supercluster as part of the Telewound Care  
15  
16 406 Canada project. The funder was not involved in the design or analysis of this study.  
17  
18

19 407

20  
21 408 **Competing interests:**

22  
23 409 RDJF is an employee, and SCW is a co-founder, chief medical officer, and shareholder of Swift  
24  
25 410 Medical. JRGL and AL were formerly employees of Swift. No funding bodies have any role in  
26  
27 411 study design, data collection and analysis, decision to publish, or preparation of the manuscript.  
28  
29 412 All other authors declare no conflict of interest.  
30  
31

32 413

33  
34 414 **Data availability statement:**

35  
36 415 Data are available in a public, open access repository. All data relevant to the study are included  
37  
38 416 in the article, uploaded as supplementary information, or deposited on Open Science Framework:  
39  
40 417 <https://osf.io/fjdvg>. Data are available under the terms of the Creative Commons Zero “No rights  
41  
42 418 reserved” data waiver (CC0 1.0 Public domain dedication). Our systematic review produced a  
43  
44 419 large amount of information, and the arising database is available for future collaboration on  
45  
46 420 additional analyses. Please contact the corresponding author with any inquiries.  
47  
48

49 421

50  
51 422 **Patient consent for publication:**

1  
2  
3  
4  
5  
6  
7  
8  
9  
10  
11  
12  
13  
14  
15  
16  
17  
18  
19  
20  
21  
22  
23  
24  
25  
26  
27  
28  
29  
30  
31  
32  
33  
34  
35  
36  
37  
38  
39  
40  
41  
42  
43  
44  
45  
46  
47  
48  
49  
50  
51  
52  
53  
54  
55  
56  
57  
58  
59  
60

423 Not required.

424

425 **Ethics and dissemination**

426 Ethics approval is not applicable for this study since no original data will be collected.

427

428 **Abstract word count: 230 words; Manuscript word count: 3409 words**

For peer review only

429 **References**

- 430 1. Mohammed HT, Hyseni L, Bui V, et al. Exploring the use and challenges of implementing  
431 virtual visits during COVID-19 in primary care and lessons for sustained use. *PLoS One*  
432 2021;16(6):e0253665. doi: 10.1371/journal.pone.0253665 [published Online First:  
433 2021/06/25]
- 434 2. Armstrong AW, Chambers CJ, Maverakis E, et al. Effectiveness of Online vs In-Person Care  
435 for Adults With Psoriasis: A Randomized Clinical Trial. *JAMA Network Open*  
436 2018;1(6):e183062-e62. doi: 10.1001/jamanetworkopen.2018.3062
- 437 3. Wang RH, Barbieri JS, Nguyen HP, et al. Clinical effectiveness and cost-effectiveness of  
438 teler dermatology: Where are we now, and what are the barriers to adoption? *Journal of*  
439 *the American Academy of Dermatology* 2020;83(1):299-307. doi:  
440 10.1016/j.jaad.2020.01.065 [published Online First: 2020/02/05]
- 441 4. Okita AL, Molina Tinoco LJ, Criado PR, et al. Use of Smartphones in Telemedicine:  
442 Comparative Study Between Standard and Teler dermatological Evaluation of High-  
443 Complex Care Hospital Inpatients. *Telemedicine journal and e-health : the official*  
444 *journal of the American Telemedicine Association* 2016;22(9):755-60. doi:  
445 <http://dx.doi.org/10.1089/tmj.2015.0086>
- 446 5. Saleh N, Abdel Hay R, Hegazy R, et al. Can teler dermatology be a useful diagnostic tool in  
447 dermatology practice in remote areas? An Egyptian experience with 600 patients. *Journal*  
448 *of telemedicine and telecare* 2017;23(2):233-38. doi:  
449 <http://dx.doi.org/10.1177/1357633X16633944>
- 450 6. Finnane A, Dallest K, Janda M, et al. Teler dermatology for the Diagnosis and Management of  
451 Skin Cancer: A Systematic Review. *JAMA Dermatol* 2017;153(3):319-27. doi:  
452 10.1001/jamadermatol.2016.4361 [published Online First: 2016/12/08]
- 453 7. Moher D, Shamseer L, Clarke M, et al. Preferred reporting items for systematic review and  
454 meta-analysis protocols (PRISMA-P) 2015 statement. *Syst Rev* 2015;4(1):1. doi:  
455 10.1186/2046-4053-4-1 [published Online First: 2015/01/03]
- 456 8. Brewer AC, Endly DC, Henley J, et al. Mobile applications in dermatology. *JAMA Dermatol*  
457 2013;149(11):1300-4. doi: 10.1001/jamadermatol.2013.5517 [published Online First:  
458 2013/09/27]
- 459 9. Rios-Yuil JM. [Correlation between face-to-face assessment and telemedicine for the  
460 diagnosis of skin disease in case conferences]. *Actas dermo-sifiliograficas*  
461 2012;103(2):138-43. doi: <https://dx.doi.org/10.1016/j.ad.2011.05.011>
- 462 10. Romero Aguilera G, Cortina De La Calle P, Vera Iglesias E, et al. Interobserver reliability of  
463 store-and-forward teler dermatology in a clinical practice setting. *Actas Dermo-*  
464 *Sifiliograficas* 2014;105(6):605-13. doi: <http://dx.doi.org/10.1016/j.adengl.2014.05.018>
- 465 11. Romero G, Sanchez P, Garcia M, et al. Randomized controlled trial comparing store-and-  
466 forward teler dermatology alone and in combination with web-camera videoconferencing.  
467 *Clinical and Experimental Dermatology* 2010;35(3):311-17. doi:  
468 <http://dx.doi.org/10.1111/j.1365-2230.2009.03503.x>
- 469 12. Sterne JAC, Savović J, Page MJ, et al. RoB 2: a revised tool for assessing risk of bias in  
470 randomised trials. *BMJ* 2019;366:l4898. doi: 10.1136/bmj.l4898
- 471 13. Altieri L, Hu J, Nguyen A, et al. Interobserver reliability of teler dermatology across all  
472 Fitzpatrick skin types. *Journal of telemedicine and telecare* 2017;23(1):68-73. doi:  
473 <http://dx.doi.org/10.1177/1357633X15621226>



- 1  
2  
3 474 14. Castelo-Soccio L, Kovarik CL, Azfar RS, et al. Reliability and validity of mobile  
4 475 teledermatology in human immunodeficiency virus-positive patients in botswana a pilot  
5 476 study. *JAMA Dermatology* 2014;150(6):601-07. doi:  
6 477 <http://dx.doi.org/10.1001/jamadermatol.2013.7321>  
7  
8 478 15. Barbieri JS, Nelson CA, James WD, et al. The reliability of teledermatology to triage  
9 479 inpatient dermatology consultations. *JAMA Dermatology* 2014;150(4):419-24. doi:  
10 480 <http://dx.doi.org/10.1001/jamadermatol.2013.9517>  
11 481 16. Barcaui CB, Lima PMO. Application of teledermoscopy in the diagnosis of pigmented  
12 482 lesions. *International Journal of Telemedicine and Applications* 2018;2018((Barcaui)  
13 483 Adjunct Professor of Dermatology, Faculty of Medical Sciences, State University of Rio  
14 484 de Janeiro, PhD in Medicine (Dermatology), University of Sao Paulo, Dermatology  
15 485 Department, Pedro Ernesto University Hospital, Rio de Janeiro State  
16 486 University):1624073. doi: <http://dx.doi.org/10.1155/2018/1624073>  
17 487 17. Batalla A, Suh-Oh HJ, Abalde T, et al. Teledermatology in Paediatrics. Observations in daily  
18 488 clinical practice. *Anales de pediatria (Barcelona, Spain : 2003)* 2016;84(6):324-30. doi:  
19 489 <http://dx.doi.org/10.1016/j.anpedi.2015.07.005>  
20 490 18. Borve A, Holst A, Gente-Lidholm A, et al. Use of the mobile phone multimedia messaging  
21 491 service for teledermatology. *Journal of Telemedicine and Telecare* 2012;18(5):292-96.  
22 492 doi: <http://dx.doi.org/10.1258/jtt.2012.120206>  
23 493 19. Borve A, Terstappen K, Sandberg C, et al. Mobile teledermoscopy-there's an app for that!  
24 494 *Dermatology practical & conceptual* 2013;3(2):41-8. doi:  
25 495 <https://dx.doi.org/10.5826/dpc.0302a05>  
26 496 20. Carter ZA, Li X, Goldman S, et al. Creation of an internal teledermatology store-and-forward  
27 497 system in an existing electronic health record: A pilot study in a safety-net public health  
28 498 and hospital system. *JAMA Dermatology* 2017;153(7):644-50. doi:  
29 499 <http://dx.doi.org/10.1001/jamadermatol.2017.0204>  
30 500 21. Chen TS, Goldyne ME, Mathes EFD, et al. Pediatric teledermatology: Observations based on  
31 501 429 consults. *Journal of the American Academy of Dermatology* 2010;62(1):61-66. doi:  
32 502 <http://dx.doi.org/10.1016/j.jaad.2009.05.039>  
33 503 22. Clarke EL, Reichenberg JS, Ahmed AM, et al. The utility of teledermatology in the  
34 504 evaluation of skin lesions. *Journal of telemedicine and telecare* 2021(9506702,  
35 505 cpj):1357633X20987423. doi: <https://dx.doi.org/10.1177/1357633X20987423>  
36 506 23. Costello CM, Cumsy HJL, Maly CJ, et al. Improving Access to Care Through the  
37 507 Establishment of a Local, Teledermatology Network. *Telemedicine journal and e-health :  
38 508 the official journal of the American Telemedicine Association* 2020;26(7):935-40. doi:  
39 509 <https://dx.doi.org/10.1089/tmj.2019.0051>  
40 510 24. Duong TA, Cordoliani F, Julliard C, et al. Emergency department diagnosis and management  
41 511 of skin diseases with real-time teledermatologic expertise. *JAMA Dermatology*  
42 512 2014;150(7):743-47. doi: <http://dx.doi.org/10.1001/jamadermatol.2013.7792>  
43 513 25. Gabel CK, Nguyen E, Karmouta R, et al. Use of teledermatology by dermatology hospitalists  
44 514 is effective in the diagnosis and management of inpatient disease. *Journal of the  
45 515 American Academy of Dermatology* 2021;84(6):1547-53. doi:  
46 516 <https://dx.doi.org/10.1016/j.jaad.2020.04.171>  
47 517 26. Gatica JL, Bertolo S, Morales E, et al. Store-and-forward teledermatology in Chile: A  
48 518 contribution to primary health care. *Piel* 2015;30(3):148-54. doi:  
49 519 <http://dx.doi.org/10.1016/j.piel.2014.07.007>  
50  
51  
52  
53  
54  
55  
56  
57  
58  
59  
60

- 1  
2  
3 520 27. Gerhardt CA, Foels R, Grewe S, et al. Assessing the Diagnostic Accuracy of  
4 521 Teledermatology Consultations at a Local Veterans Affairs Dermatology Clinic. *Cureus*  
5 522 2021;13(6):e15406. doi: <https://dx.doi.org/10.7759/cureus.15406>  
6 523  
7 523 28. Giavina-Bianchi M, Azevedo MFD, Sousa RM, et al. Part II: Accuracy of Teledermatology  
8 524 in Skin Neoplasms. *Frontiers in medicine* 2020;7(101648047):598903. doi:  
9 525 <https://dx.doi.org/10.3389/fmed.2020.598903>  
10 526  
11 526 29. Giavina-Bianchi M, Sousa R, Cordioli E. Part I: Accuracy of Teledermatology in  
12 527 Inflammatory Dermatoses. *Frontiers in medicine* 2020;7(101648047):585792. doi:  
13 528 <https://dx.doi.org/10.3389/fmed.2020.585792>  
14 529  
15 530 30. Keller JJ, Johnson JP, Latour E. Inpatient teledermatology: Diagnostic and therapeutic  
16 531 concordance among a hospitalist, dermatologist, and teledermatologist using store-and-  
17 532 forward teledermatology. *Journal of the American Academy of Dermatology*  
18 533 2020;82(5):1262-67. doi: <https://dx.doi.org/10.1016/j.jaad.2020.01.030>  
19 534  
20 535 31. Lamel SA, Haldeman KM, Ely H, et al. Application of mobile teledermatology for skin  
21 536 cancer screening. *Journal of the American Academy of Dermatology* 2012;67(4):576-81.  
22 537 doi: <http://dx.doi.org/10.1016/j.jaad.2011.11.957>  
23 538  
24 539 32. Muir J, Xu C, Singh P, et al. Incorporating teledermatology into emergency medicine. *EMA -*  
25 540 *Emergency Medicine Australasia* 2011;23(5):562-68. doi:  
26 541 <http://dx.doi.org/10.1111/j.1742-6723.2011.01443.x>  
27 542  
28 543 33. Nami N, Rubegni P, Fimiani M, et al. Concordance and Time Estimation of Store-and-  
29 544 Forward Mobile Teledermatology Compared to Classical Face-to-Face Consultation.  
30 545 *Acta Dermato-Venereologica* 2015;95(1):35-39. doi:  
31 546 <http://dx.doi.org/10.2340/00015555-1876>  
32 547  
33 548 34. Patro BK, Tripathy JP, De D, et al. Diagnostic agreement between a primary care physician  
34 549 and a teledermatologist for common dermatological conditions in North India. *Indian*  
35 550 *dermatology online journal* 2015;6(1):21-6. doi: [https://dx.doi.org/10.4103/2229-](https://dx.doi.org/10.4103/2229-5178.148927)  
36 551 [5178.148927](https://dx.doi.org/10.4103/2229-5178.148927)  
37 552  
38 553 35. Ribas J, Schettini APM, Ribas CBDR, et al. Agreement between dermatological diagnoses  
39 554 made by live examination compared to analysis of digital images. *Anais Brasileiros de*  
40 555 *Dermatologia* 2010;85(4):441-47. doi: [http://dx.doi.org/10.1590/s0365-](http://dx.doi.org/10.1590/s0365-05962010000400004)  
41 556 [05962010000400004](http://dx.doi.org/10.1590/s0365-05962010000400004)  
42 557  
43 558 36. Rubegni P, Nami N, Poggiali S, et al. Geriatric teledermatology: Store-and-forward vs. face-  
44 559 to-face examination. *Journal of the European Academy of Dermatology and Venereology*  
45 560 2011;25(11):1334-39. doi: <http://dx.doi.org/10.1111/j.1468-3083.2011.03986.x>  
46 561  
47 562 37. Sola-Ortigosa J, Munoz-Santos C, Masat-Tico T, et al. The Role of Teledermatology and  
48 563 Teledermoscopy in the Diagnosis of Actinic Keratosis and Field Cancerization. *The*  
49 564 *Journal of investigative dermatology* 2020;140(10):1976-84.e4. doi:  
50 565 <https://dx.doi.org/10.1016/j.jid.2020.02.013>  
51 566  
52 567 38. Tan E, Yung A, Oakley A, et al. Successful triage of patients referred to a skin lesion clinic  
53 568 using teledermoscopy (IMAGE IT trial). *British Journal of Dermatology*  
54 569 2010;162(4):803-11. doi: <http://dx.doi.org/10.1111/j.1365-2133.2010.09673.x>  
55 570  
56 571 39. Tran K, Ayad M, Monir S, et al. Mobile teledermatology in the developing world:  
57 572 Implications of a feasibility study on 30 Egyptian patients with common skin diseases.  
58 573 *Journal of the American Academy of Dermatology* 2011;64(2):302-09. doi:  
59 574 <http://dx.doi.org/10.1016/j.jaad.2010.01.010>  
60 575

- 1  
2  
3 565 40. Vano-Galvan S, Aguayo-Leiva I, Rios-Buceta L, et al. Store-and-forward teledermatology:  
4 566 Assessment of validity in a series of 2000 observations. *Actas Dermo-Sifiliograficas*  
5 567 2011;102(4):277-83. doi: [http://dx.doi.org/10.1016/S1578-2190\(11\)70803-4](http://dx.doi.org/10.1016/S1578-2190(11)70803-4)  
6 568 41. Vestergaard T, Prasad SC, Schuster A, et al. Diagnostic accuracy and interobserver  
7 569 concordance: teledermoscopy of 600 suspicious skin lesions in Southern Denmark.  
8 570 *Journal of the European Academy of Dermatology and Venereology : JEADV*  
9 571 2020;34(7):1601-08. doi: <https://dx.doi.org/10.1111/jdv.16275>  
10 572 42. Gravely AA, Warshaw EM, Nelson DB. Reliability of store and forward teledermatology for  
11 573 skin neoplasms. *Journal of the American Academy of Dermatology* 2015;72(3):426-35.  
12 574 doi: <http://dx.doi.org/10.1016/j.jaad.2014.11.001>  
13 575 43. Zanini M. Analyze of diagnostic concordance between face-to-face and teledermatology  
14 576 diagnosis. *Medicina Cutanea Ibero-Latino-Americana* 2013;41(2):60-62. doi:  
15 577 <http://dx.doi.org/10.4464/MC.2013.41.2.5058>  
16 578 44. Zink A, Kolbinger A, Leibl M, et al. The value of teledermatology using a mobile app  
17 579 compared to conventional dermatology. *European Journal of Dermatology*  
18 580 2017;27(4):429-31. doi: <http://dx.doi.org/10.1684/ejd.2017.3044>  
19 581 45. Zink A, Kolbinger A, Leibl M, et al. Teledermoscopy by mobile phones: Reliable help in the  
20 582 diagnosis of skin lesions? *Hautarzt* 2017;68(11):890-95. doi:  
21 583 <http://dx.doi.org/10.1007/s00105-017-4042-0>  
22 584 46. Marchell R, Locatis C, Liu W-L, et al. Comparing High Definition Live Interactive and  
23 585 Store-and-Forward Consultations to In-Person Examinations. *Telemedicine journal and*  
24 586 *e-health : the official journal of the American Telemedicine Association* 2017;23(3):213-  
25 587 18. doi: <http://dx.doi.org/10.1089/tmj.2016.0093>  
26 588 47. Jones L, Jameson M, Oakley A. Remote Skin Cancer Diagnosis: Adding Images to  
27 589 Electronic Referrals Is More Efficient Than Wait-Listing for a Nurse-Led Imaging Clinic.  
28 590 *Cancers (Basel)* 2021;13(22) doi: 10.3390/cancers13225828 [published Online First:  
29 591 2021/11/28]  
30 592 48. Gonzalez Coloma F, Sandoval Garces M, Gedda Quiroga V, et al. Teledermatology in  
31 593 Remote Parts of Chile: Experience in 4 Isolated Rural Areas. *Actas dermo-sifiliograficas*  
32 594 2019;110(8):653-58. doi: <https://dx.doi.org/10.1016/j.ad.2019.01.009>  
33 595 49. Goulart Silveira CE, Carcano C, Mauad EC, et al. Call phone usefulness to improve the skin  
34 596 cancer screening: preliminary results and critical analysis of mobile app development.  
35 597 *Rural & Remote Health* 2019;19(1):1-7. doi: 10.22605/RRH4895  
36 598 50. Piccoli MF, Amorim BDB, Wagner HM, et al. Teledermatology protocol for screening of  
37 599 Skin cancer. *Anais Brasileiros de Dermatologia* 2015;90(2):202-10. doi:  
38 600 <http://dx.doi.org/10.1590/abd1806-4841.20153163>  
39 601 51. Senel E, Baba M, Durdu M. The contribution of teledermatoscopy to the diagnosis and  
40 602 management of non-melanocytic skin tumours. *Journal of Telemedicine and Telecare*  
41 603 2013;19(1):60-63. doi: <http://dx.doi.org/10.1177/1357633X12474961>  
42 604 52. Gravely AA, Nelson DB, Warshaw EM. Accuracy of teledermatology/teledermoscopy and  
43 605 clinic-based dermatology for specific categories of skin neoplasms. *Journal of the*  
44 606 *American Academy of Dermatology* 2010;63(2):348-52. doi:  
45 607 <http://dx.doi.org/10.1016/j.jaad.2009.10.037>  
46 608 53. McFarland LV, Raugi GJ, Reiber GE. Primary care provider and imaging technician  
47 609 satisfaction with a teledermatology project in rural Veterans Health Administration  
48  
49  
50  
51  
52  
53  
54  
55  
56  
57  
58  
59  
60

- 1  
2  
3 610 clinics. *Telemed J E Health* 2013;19(11):815-25. doi: 10.1089/tmj.2012.0327 [published  
4 611 Online First: 20130921]  
5 612 54. Massone C, Javor S, Amato I, et al. Training of primary care physicians enhances  
6 613 performance of mobile teledermatology. *Anais brasileiros de dermatologia*  
7 614 2021;96(4):514-16. doi: <https://dx.doi.org/10.1016/j.abd.2020.07.017>  
8 615 55. Finnane A, Curiel-Lewandrowski C, Wimberley G, et al. Proposed Technical Guidelines for  
9 616 the Acquisition of Clinical Images of Skin-Related Conditions. *JAMA Dermatol*  
10 617 2017;153(5):453-57. doi: 10.1001/jamadermatol.2016.6214 [published Online First:  
11 618 2017/02/28]  
12 619 56. Lee JJ, English JC, 3rd. Teledermatology: A Review and Update. *Am J Clin Dermatol*  
13 620 2018;19(2):253-60. doi: 10.1007/s40257-017-0317-6 [published Online First:  
14 621 2017/09/06]  
15 622 57. Bastola M, Locatis C, Fontelo P. Diagnostic Reliability of In-Person Versus Remote  
16 623 Dermatology: A Meta-Analysis. *Telemed J E Health* 2021;27(3):247-50. doi:  
17 624 10.1089/tmj.2020.0043 [published Online First: 2020/07/09]  
18 625  
19  
20  
21  
22 626  
23  
24  
25  
26  
27  
28  
29  
30  
31  
32  
33  
34  
35  
36  
37  
38  
39  
40  
41  
42  
43  
44  
45  
46  
47  
48  
49  
50  
51  
52  
53  
54  
55  
56  
57  
58  
59  
60

1  
2  
3 627 **Figure Legends**  
4

5 628 **Figure 1. PRISMA Flow diagram of study selection.**  
6  
7 629  
8 630

9 631 **Figure 2. Forest plot representing F2F and teledermatology primary diagnostic agreement by whether imaging acquisition training was indicated by the study.**

10 632  
11 633 Forest plot representing F2F and teledermatology primary diagnostic agreement when image  
12 634 acquisition training is involved. Studies were sorted into two groups, a) Did not conduct or did not  
13 635 report training personnel on image acquisition; b) Stated that person in charge of image acquisition  
14 636 was trained. **(Left)** Forest plot representing percentage agreement and 95% C.I. for overall  
15 637 concordance across 40 studies with a total of 72 unique number of comparisons, N of events and total  
16 638 included participants. **(Right)** Forest plot representing kappa concordance and 95% C.I. for overall  
17 639 concordance across 21 studies with a total of 45 unique number of comparisons, N of total included  
18 640 participants. Abbreviations: F2F (Face-to-Face), PCP (Primary Care Provider), TD (Teledermatology  
19 641 or Teledermatologist).  
20 642

21 643  
22 644 **Figure 3. Forest plot representing F2F and teledermatology primary diagnostic agreement by device type used to capture clinical photographs.**

23 645  
24 646 Forest plot representing F2F and teledermatology primary diagnostic agreement by imaging  
25 647 technology used. Studies were sorted into three groups, i) Digital photography ii) Imaging technology  
26 648 not mentioned iii) Smartphone or tablet. **(Left)** Forest plot representing percentage agreement and  
27 649 95% C.I. for overall concordance across 40 studies with a total of 72 unique number of comparisons,  
28 650 N of events and total included participants. **(Right)** Forest plot representing kappa concordance and  
29 651 95% C.I. for overall concordance across 21 studies with a total of 45 unique number of comparisons,  
30 652 N of total included participants. Abbreviations: F2F (Face-to-Face), PCP (Primary Care Provider), TD  
31 653 (Teledermatology or Teledermatologist)  
32  
33  
34  
35  
36  
37  
38  
39  
40  
41  
42  
43  
44  
45  
46  
47  
48  
49  
50  
51  
52  
53  
54  
55  
56  
57  
58  
59  
60

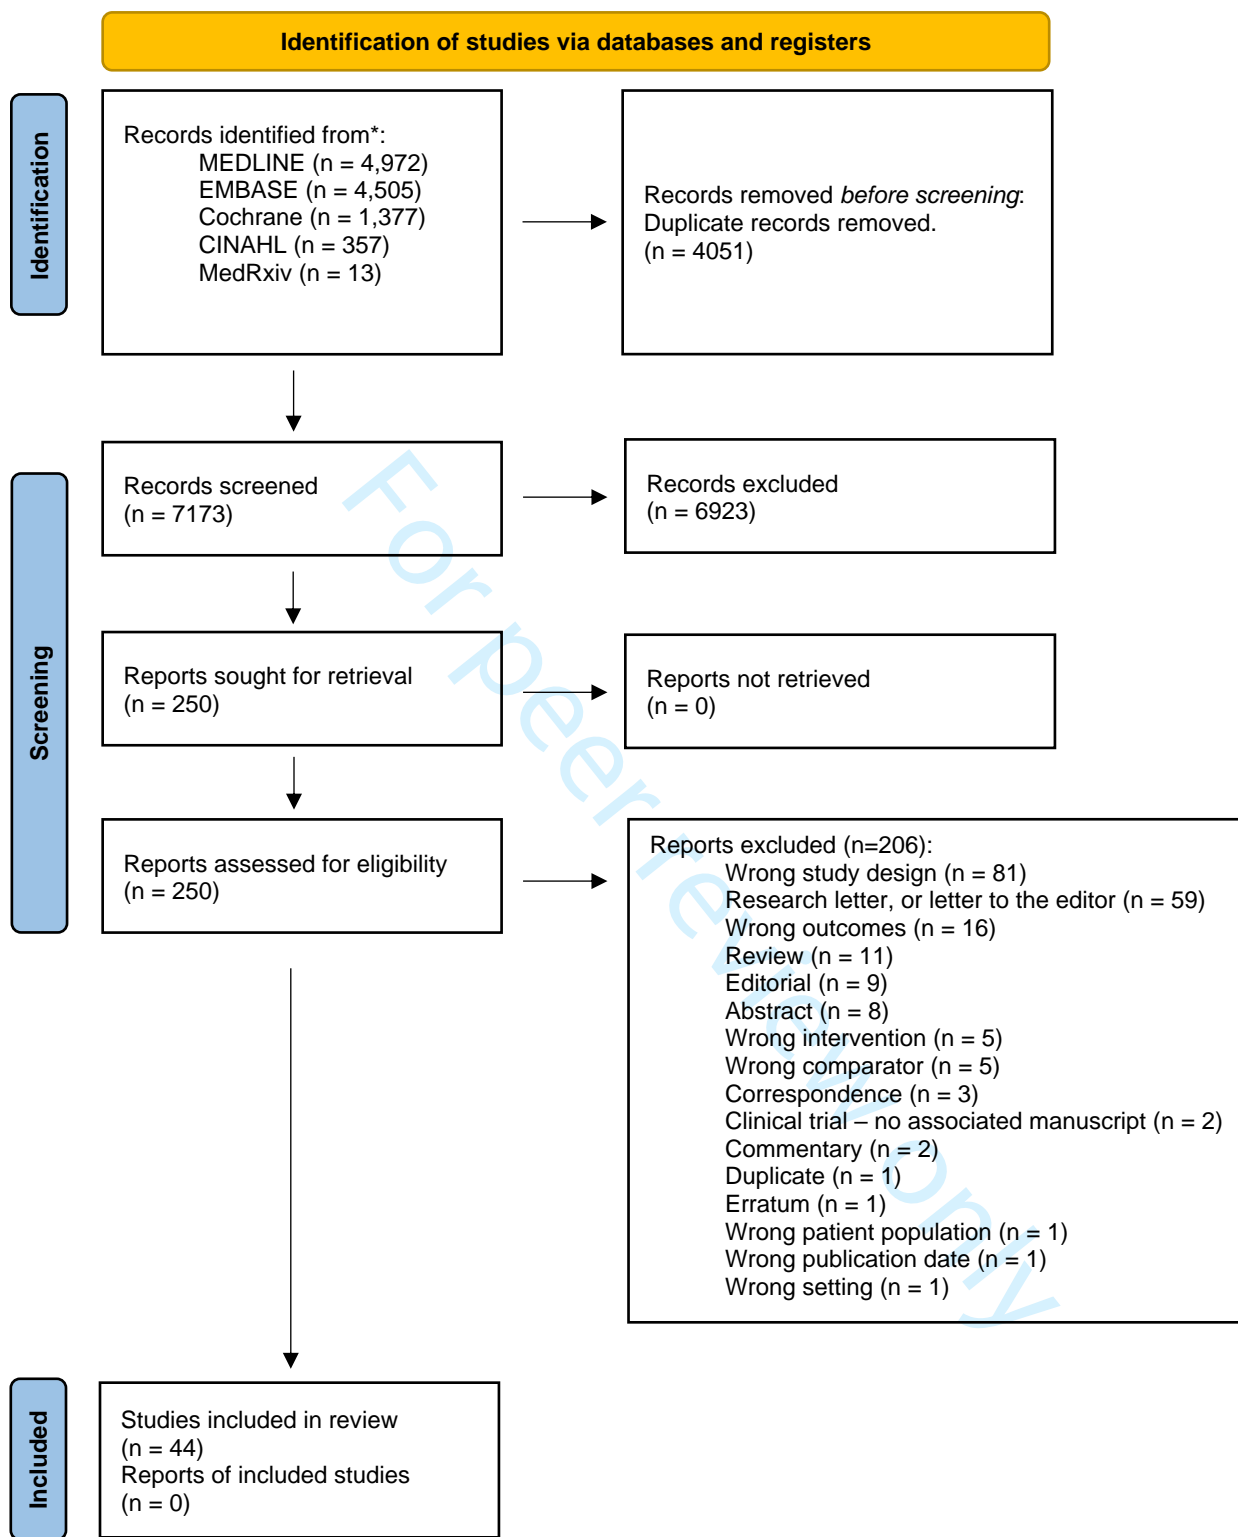

Figure 1. PRISMA Flow diagram of study selection.



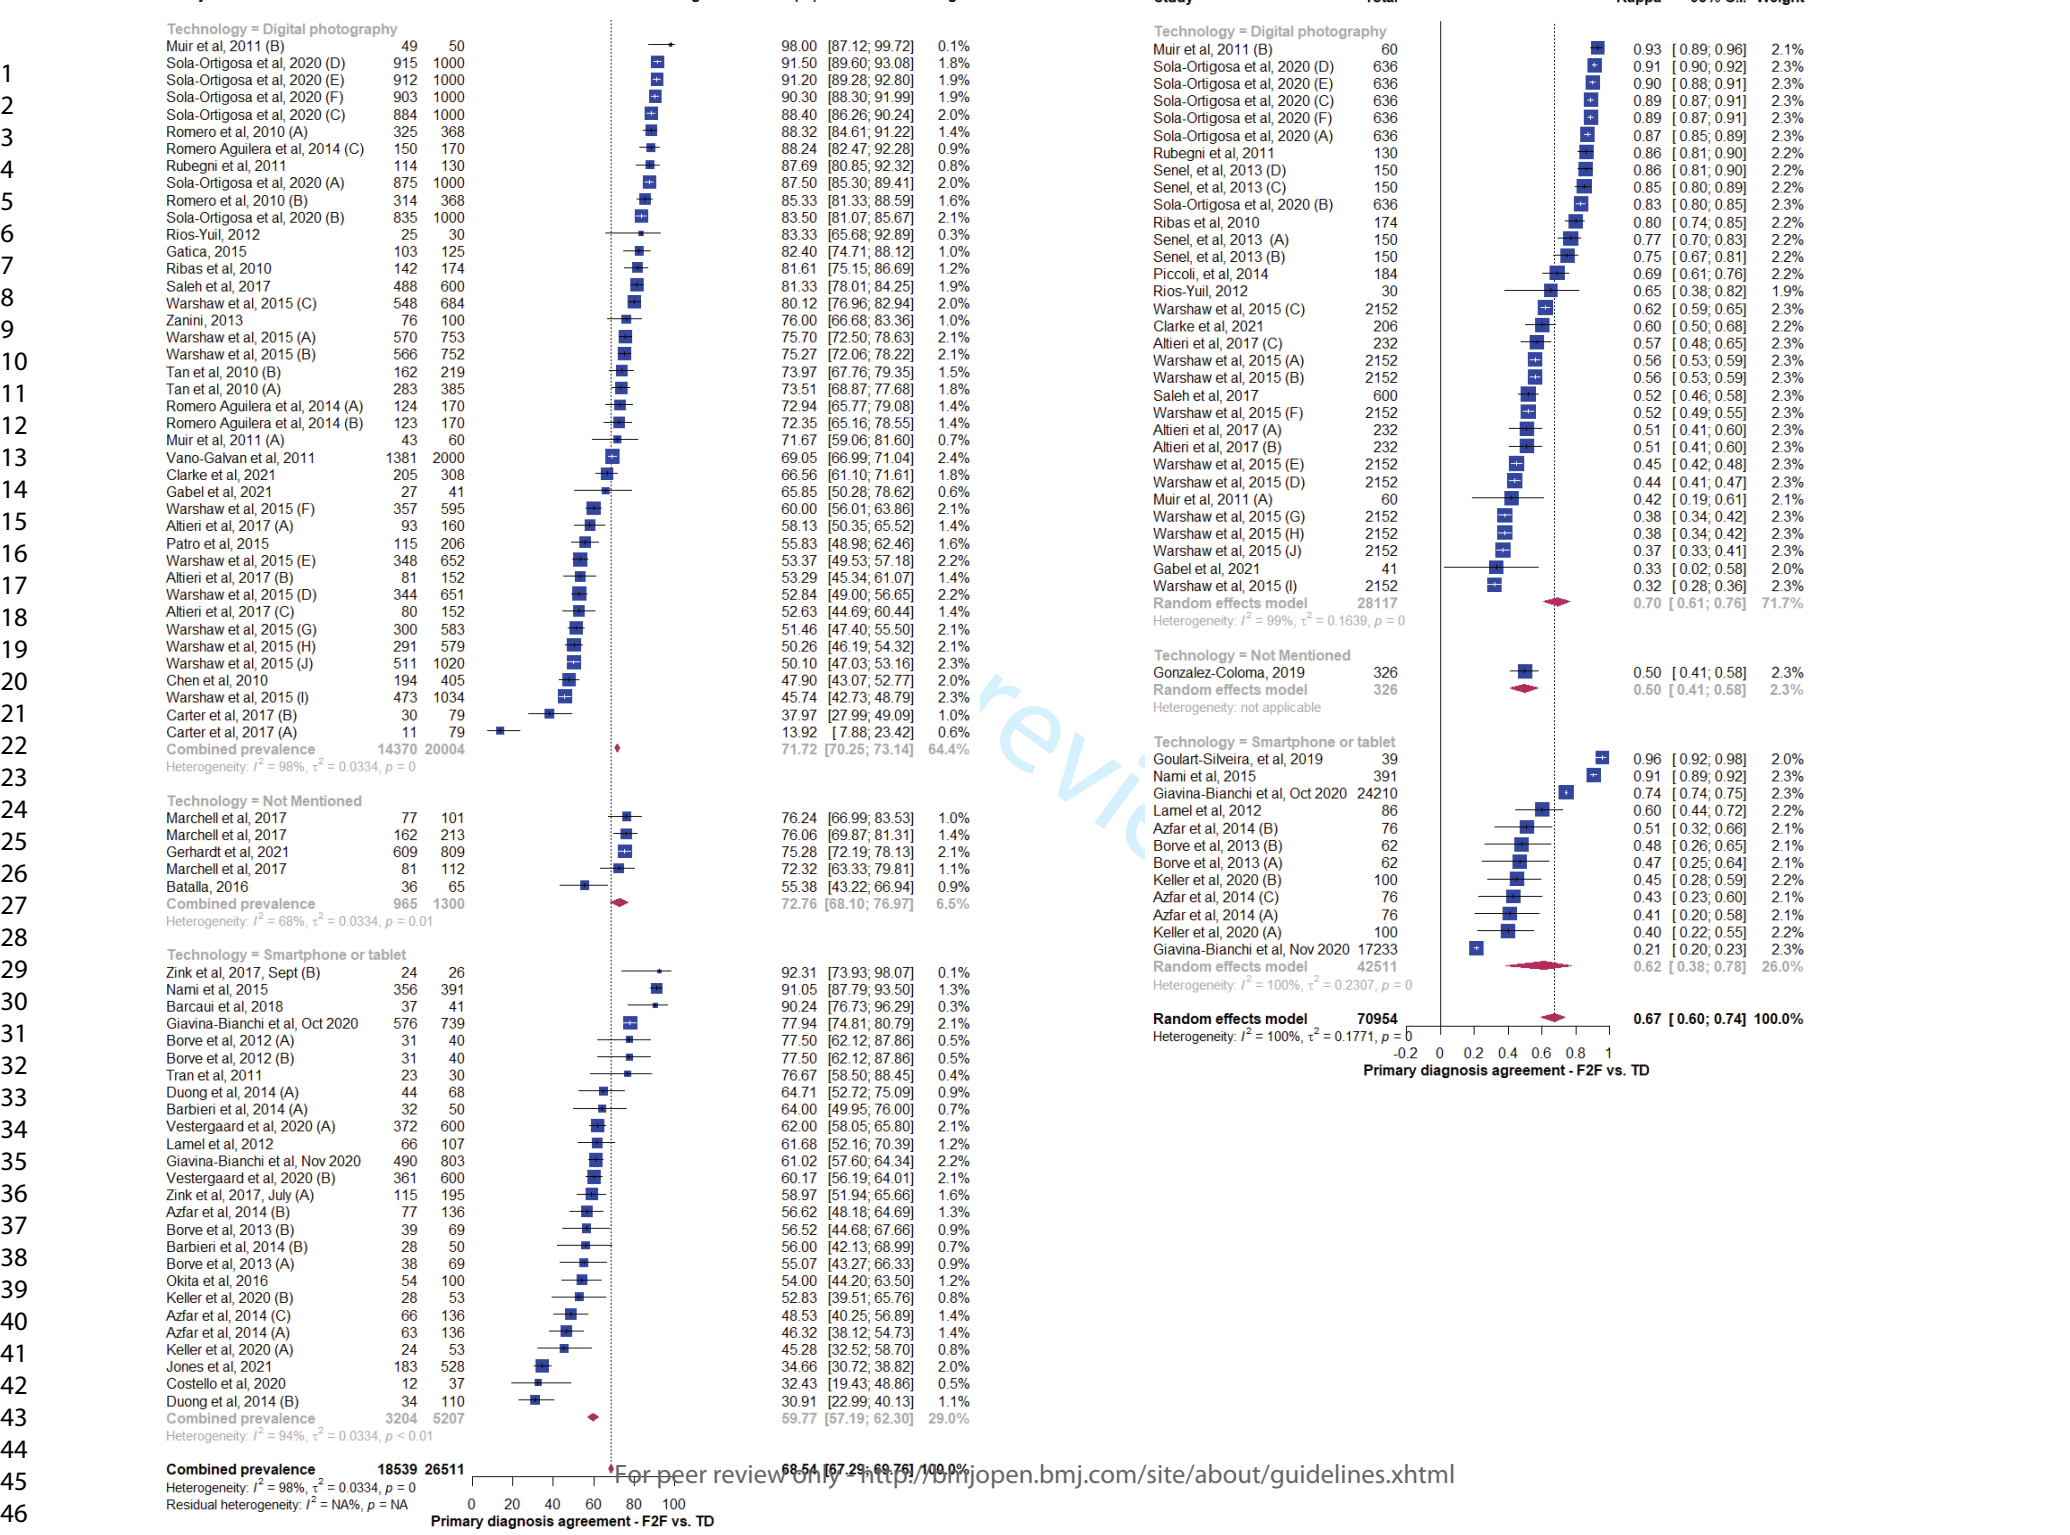

For peer review only - <http://bmjopen.bmj.com/site/about/guidelines.xhtml>

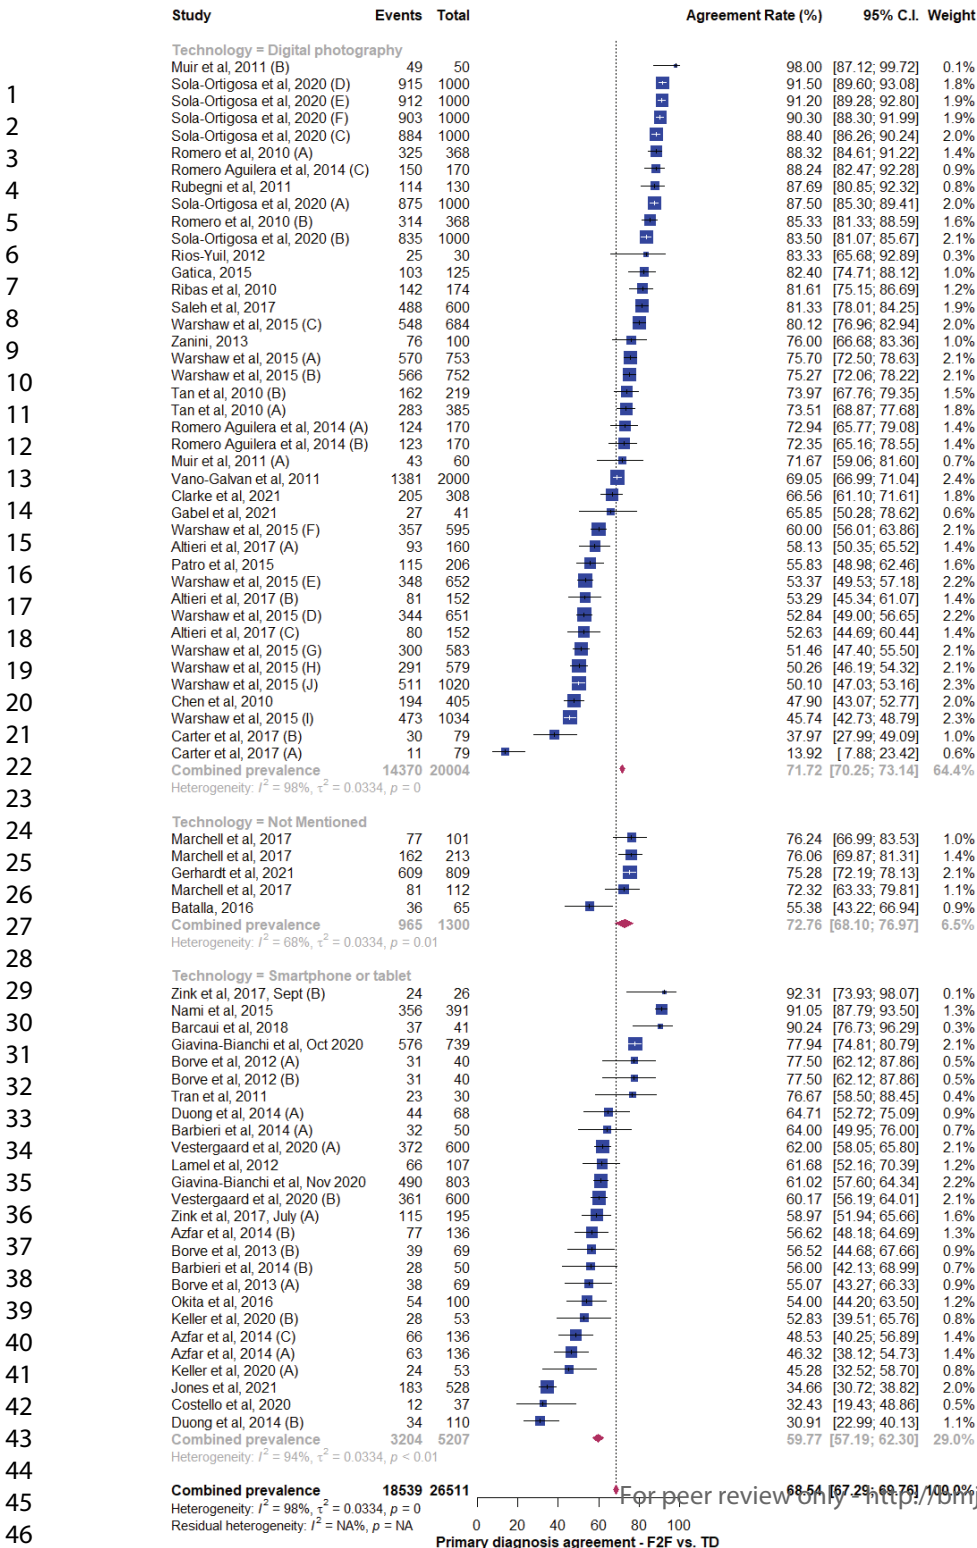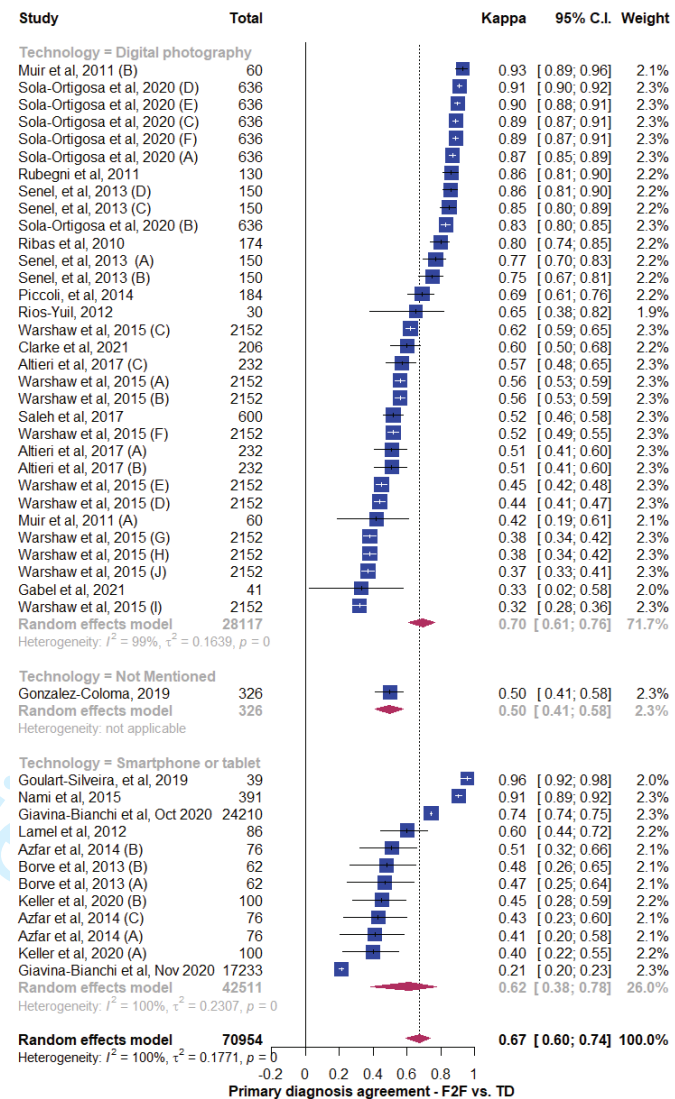

Primary diagnosis agreement - F2F vs. TD

Primary diagnosis agreement - F2F vs. TD

For peer review only - <http://bmjopen.bmj.com/site/about/guidelines.xhtml>



## Supplementary Online Content

**Title:** Diagnostic Reliability in Teledermatology: A Systematic Review and Meta-Analysis

### Authors

Adrienn N. Bourkas\*<sup>1</sup> (MSc), Natasha Barone\*<sup>2</sup> (MD, MSc), Matthew E.C. Bourkas<sup>3</sup> (PhD), Matthew Mannarino<sup>4</sup> (PhD), Robert D. J. Fraser<sup>5,6</sup> (RN, MN), Amy Lorincz (MSc), Sheila C. Wang<sup>5,7</sup> (MD, PhD), Jose L. Ramirez-GarciaLuna<sup>4</sup> (MD, PhD)

\* Authors contributed equally

### Affiliations

<sup>1</sup>Faculty of Health Sciences, Queen's University School of Medicine, Kingston, Ontario, Canada

<sup>2</sup>Faculty of Medicine and Health Sciences, McGill University, Montreal, Quebec, Canada

<sup>3</sup>Temerty Faculty of Medicine, Department of Biochemistry, University of Toronto, Toronto, Ontario, Canada

<sup>4</sup>Department of Surgery, McGill University, Montreal, Quebec, Canada

<sup>5</sup>Swift Medical Inc., Toronto, Ontario, Canada

<sup>6</sup>Arthur Labatt Family School of Nursing, Western University, London, Ontario Canada

<sup>7</sup>Department of Medicine, Division of Dermatology, McGill University Health Centre, Montreal, Quebec, Canada

## Supplementary eMethods

### Search Strategy

The search strategy was written for Ovid Medline and translated using each database's syntax, controlled vocabulary, and search fields. MeSH terms, Emtree terms, and free text words were used for teledermatology and skin conditions such as melanoma and related synonyms. To identify additional articles not captured through the aforementioned search, a manual search was conducted via reference search of the included studies.

All database records were downloaded to EndNote X9 (Clarivate) and uploaded to web-based software for deduplication, screening, and full-text evaluation (Covidence; Veritas Health Innovation). We contacted three study authors to gain access to their published work.<sup>1-3</sup> The search strategy is available below.

### Ovid MEDLINE Search

Ovid MEDLINE(R) and Epub Ahead of Print, In-Process, In-Data-Review & Other Non-Indexed Citations and Daily <1946 to 2022 May 02>

|    |                                           |        |
|----|-------------------------------------------|--------|
| 1  | e consult*.mp.                            | 322    |
| 2  | econsult*.mp.                             | 218    |
| 3  | electronic consult*.mp.                   | 366    |
| 4  | e health.mp.                              | 4095   |
| 5  | ehealth.mp.                               | 6823   |
| 6  | e visit*.mp.                              | 88     |
| 7  | evisit*.mp.                               | 26     |
| 8  | home video visit*.mp.                     | 4      |
| 9  | internet/ or internet-based intervention/ | 82046  |
| 10 | internet.mp.                              | 128675 |
| 11 | offsite care.mp.                          | 4      |
| 12 | off site care.mp.                         | 9      |
| 13 | ontario telemedicine network.mp.          | 19     |
| 14 | Remote Consultation/                      | 5689   |
| 15 | remote consultation*.mp.                  | 6406   |
| 16 | remote visit*.mp.                         | 95     |
| 17 | tele care.mp.                             | 40     |
| 18 | telecare.mp.                              | 945    |
| 19 | tele consult*.mp.                         | 208    |
| 20 | teleconsult*.mp.                          | 2208   |
| 21 | tele diagnos*.mp.                         | 46     |
| 22 | telehealth.mp.                            | 13222  |
| 23 | tele health.mp.                           | 287    |
| 24 | telemedicine/                             | 36763  |
| 25 | telemedicine.mp.                          | 47751  |
| 26 | tele medicine.mp.                         | 197    |
| 27 | telemonitor*.mp.                          | 2380   |
| 28 | tele monitor*.mp.                         | 209    |
| 29 | Telepathology/                            | 918    |
| 30 | telepatholog*.mp.                         | 1223   |
| 31 | tele patholog*.mp.                        | 25     |
| 32 | telepractice*.mp.                         | 276    |
| 33 | tele practice*.mp.                        | 16     |
| 34 | Therapy, Computer-Assisted/               | 6969   |
| 35 | video consult*.mp.                        | 827    |
| 36 | videoconsult*.mp.                         | 41     |
| 37 | virtual care.mp.                          | 1177   |
| 38 | web based.mp.                             | 42402  |
| 39 | Telepathology/                            | 918    |

1  
2  
3 77 40 or/1-39 216985  
4 78 41 Dermatology/21077  
5 79 42 dermatolog\*.mp. 110593  
6 80 43 dermatopatholog\*.mp. 2990  
7 81 44 exp Skin Diseases/di [Diagnosis] 196739  
8 82 45 exp Skin Neoplasms/ 142454  
9 83 46 skin.mp. 880457  
10 84 47 exp Skin Abnormalities/ 34228  
11 85 48 burns/ or burns, chemical/ or burns, electric/ or sunburn/ 59533  
12 86 49 burn\*.mp. 141877  
13 87 50 wound healing/ or cicatrix/ 127484  
14 88 51 wound\*.mp. 446154  
15 89 52 or/41-51 1580012  
16 90 53 40 and 52 7160  
17 91 54 teledermatolog\*.mp. 1273  
18 92 55 tele dermatolog\*.mp. 35  
19 93 56 54 or 55 1298  
20 94 57 53 or 56 7448  
21 95 58 limit 57 to dt=20100101-20220501 [January 1st, 2010 to May 1st, 2022] 4972  
22 96  
23 97

### Embase Search

24 99 Embase Classic+Embase <1947 to 2021 July 15>  
25 100 1 computer assisted therapy/ 4772  
26 101 2 e consult\*.mp. 411  
27 102 3 econsult\*.mp. 283  
28 103 4 electronic consult\*.mp. 461  
29 104 5 e health.mp. 4440  
30 105 6 ehealth.mp. 5099  
31 106 7 e visit\*.mp. 83  
32 107 8 evisit\*.mp. 30  
33 108 9 home video visit\*.mp. 10  
34 109 10 internet/ or web-based intervention/ 114861  
35 110 11 internet.mp. 143810  
36 111 12 offsite care.mp. 5  
37 112 13 off site care.mp. 12  
38 113 14 ontario telemedicine network.mp. 36  
39 114 15 remote consultation\*.mp. 808  
40 115 16 remote visit\*.mp. 79  
41 116 17 tele care.mp. 55  
42 117 18 telecare.mp. 983  
43 118 19 teleconsultation/ 11686  
44 119 20 tele consult\*.mp. 243  
45 120 21 teleconsult\*.mp. 12352  
46 121 22 tele diagnos\*.mp. 53  
47 122 23 telehealth.mp. 15276  
48 123 24 tele health.mp. 389  
49 124 25 telemedicine/ 31867  
50 125 26 telemedicine.mp. 38951  
51 126 27 tele medicine.mp. 333  
52 127 28 telemonitor\*.mp. 4838  
53 128 29 tele monitor\*.mp. 344  
54 129 30 Telepathology/ 869  
55 130 31 telepatholog\*.mp. 1265  
56 131 32 tele patholog\*.mp. 41  
57 132 33 telepractice\*.mp. 162

57  
58  
59  
60

1  
2  
3 133 34 tele practice\*.mp. 9  
4 134 35 video consult\*.mp. 751  
5 135 36 videoconsult\*.mp. 54  
6 136 37 virtual care.mp. 496  
7 137 38 web based.mp. 49157  
8 138 39 or/1-38 240118  
9 139 40 dermatology/ or cosmetic dermatology/ or pediatric dermatology/ or psychodermatology/ 51419  
10 140 41 dermatolog\*.mp. 161210  
11 141 42 dermatopatholog\*.mp. 3737  
12 142 43 burn/ or burn contracture/ or electric burn/ or face burn/ or hand burn/ or ionizing radiation burn/ or scald/ or  
13 143 sunburn/ 74890  
14 144 44 burn\*.mp. 189010  
15 145 45 exp skin disease/di [Diagnosis] 209136  
16 146 46 exp skin tumor/ 213775  
17 147 47 skin\*.mp. 1294867  
18 148 48 or/40-47 1665263  
19 149 49 39 and 48 7063  
20 150 50 teledermatology/ 1295  
21 151 51 tele dermatolog\*.mp. 42  
22 152 52 teledermatolog\*.mp. 1798  
23 153 53 50 or 51 or 52 1812  
24 154 54 49 or 53 8004  
25 155 55 limit 54 to (books or chapter or conference abstract or conference paper or "conference review") 1828  
26 156 56 54 not 55 6176  
27 157 57 limit 56 to yr="2010 -Current" 4505  
28 158

### 28 159 Cochrane Search

29 160 EBM Reviews - Cochrane Database of Systematic Reviews <2005 to July 14, 2021> EBM Reviews - ACP Journal  
30 161 Club <1991 to June 2021> EBM Reviews - Database of Abstracts of Reviews of Effects <1st Quarter 2016> EBM  
31 162 Reviews - Cochrane Clinical Answers <June 2021> EBM Reviews - Cochrane Central Register of Controlled Trials  
32 163 <June 2021> EBM Reviews - Cochrane Methodology Register <3rd Quarter 2012> EBM Reviews - Health  
33 164 Technology Assessment <4th Quarter 2016> EBM Reviews - NHS Economic Evaluation Database <1st Quarter  
34 165 2016>  
35 166 1 e consult\*.mp. 44  
36 167 2 econsult\*.mp. 22  
37 168 3 electronic consult\*.mp. 29  
38 169 4 e health.mp. 617  
39 170 5 ehealth.mp. 766  
40 171 6 e visit\*.mp. 14  
41 172 7 evisit\*.mp. 1  
42 173 8 home video visit\*.mp. 3  
43 174 9 internet/ or internet-based intervention/ 4,275  
44 175 10 internet.mp. 15,059  
45 176 11 offsite care.mp. 2  
46 177 12 off site care.mp. 2  
47 178 13 ontario telemedicine network.mp. 7  
48 179 14 Remote Consultation/ 460  
49 180 15 remote consultation\*.mp. 551  
50 181 16 remote visit\*.mp. 17  
51 182 17 tele care.mp. 34  
52 183 18 telecare.mp. 249  
53 184 19 tele consult\*.mp. 59  
54 185 20 teleconsult\*.mp. 822  
55 186 21 tele diagnos\*.mp. 4  
56 187 22 telehealth.mp. 2,308  
57 188 23 tele health.mp. 128

|    |     |                                                               |         |
|----|-----|---------------------------------------------------------------|---------|
| 1  |     |                                                               |         |
| 2  |     |                                                               |         |
| 3  | 189 | 24 telemedicine/                                              | 2,617   |
| 4  | 190 | 25 telemedicine.mp.                                           | 4,819   |
| 5  | 191 | 26 tele medicine.mp.                                          | 57      |
| 6  | 192 | 27 telemonitor*.mp.                                           | 1,236   |
| 7  | 193 | 28 tele monitor*.mp.                                          | 115     |
| 8  | 194 | 29 Telepathology/                                             | 8       |
| 9  | 195 | 30 telepatholog*.mp.                                          | 22      |
| 10 | 196 | 31 tele patholog*.mp.                                         | 2       |
| 11 | 197 | 32 telepractice*.mp.                                          | 37      |
| 12 | 198 | 33 tele practice*.mp.                                         | 0       |
| 13 | 199 | 34 Therapy, Computer-Assisted/                                | 1,391   |
| 14 | 200 | 35 video consult*.mp.                                         | 117     |
| 15 | 201 | 36 videoconsult*.mp.                                          | 8       |
| 16 | 202 | 37 virtual care.mp.                                           | 31      |
| 17 | 203 | 38 web based.mp.                                              | 9,110   |
| 18 | 204 | 39 Telepathology/                                             | 8       |
| 19 | 205 | 40 or/1-39                                                    | 29,268  |
| 20 | 206 | 41 Dermatology/                                               | 124     |
| 21 | 207 | 42 dermatolog*.mp.                                            | 10,838  |
| 22 | 208 | 43 dermatopatholog*.mp.                                       | 80      |
| 23 | 209 | 44 exp Skin Diseases/di [Diagnosis]                           | 630     |
| 24 | 210 | 45 exp Skin Neoplasms/                                        | 1,738   |
| 25 | 211 | 46 skin.mp.                                                   | 67,534  |
| 26 | 212 | 47 exp Skin Abnormalities/                                    | 269     |
| 27 | 213 | 48 burns/ or burns, chemical/ or burns, electric/ or sunburn/ | 1,779   |
| 28 | 214 | 49 burn*.mp.                                                  | 12,780  |
| 29 | 215 | 50 wound healing/ or cicatrix/                                | 5,677   |
| 30 | 216 | 51 wound*.mp.                                                 | 35,982  |
| 31 | 217 | 52 or/41-51                                                   | 110,390 |
| 32 | 218 | 53 40 and 52                                                  | 1,622   |
| 33 | 219 | 54 teledermatolog*.mp.                                        | 149     |
| 34 | 220 | 55 tele dermatolog*.mp.                                       | 20      |
| 35 | 221 | 56 54 or 55                                                   | 151     |
| 36 | 222 | 57 53 or 56                                                   | 1,684   |
| 37 | 223 | 58 limit 57 to yr="2010 -Current"                             | 1,377   |
| 38 | 224 |                                                               |         |

### 225 CINAHL Search

226 Searched keyword teledermatology and set limit to yr="2010-Current" 357

### 228 MedRxiv Search

229 Searched keyword teledermatology and set limit to yr="2010-Current" 13

### 231 Eligibility Criteria

232 Inclusion and exclusion criteria are summarized in **eTable 2**.

### 234 Data Selection and Extraction

235 Information extracted from full-text articles is summarized in **eTable 3**.

### 237 Data Analysis and Synthesis

238 In this study, a letter was assigned to each unique study grouping as explained in **eTable 4**. For both the percentage  
239 of agreement and kappa values, forest plots, the  $I^2$  index, and the  $\tau^2$  statistic were used in combination to investigate  
240 statistical heterogeneity.

241  
242 Cohen's kappa values for diagnostic concordance between teledermatology and F2F physicians were interpreted based  
243 on the following criteria.<sup>4</sup> Values between 0–.20 indicate no agreement, .21–.39 minimal agreement, .40–.59 weak  
244 agreement, .60–.79 moderate agreement, .80–.90 strong agreement, and above .90 almost perfect agreement.

1  
2  
3 245  
4 246 Sub-group analysis included different skin conditions, specialization of the F2F physician, whether staff were trained  
5 247 on image acquisition, the technology used for image acquisition, the use of teledermoscopy, studies conducted pre- or  
6 248 post-pandemic, and the risk of bias. Confounding factors, such as technology type, year of publication, and training  
7 249 of study raters, were controlled using meta-regression.

8 250  
9 251 Proportions meta-analysis looked at weighted averages, and 95% confidence intervals were reported. Publication bias  
10 252 was not statistically pursued due to the substantial heterogeneity observed, in addition to the authors' decision to pursue  
11 253 a meta-analysis of proportions.

12  
13  
14  
15  
16  
17  
18  
19  
20  
21  
22  
23  
24  
25  
26  
27  
28  
29  
30  
31  
32  
33  
34  
35  
36  
37  
38  
39  
40  
41  
42  
43  
44  
45  
46  
47  
48  
49  
50  
51  
52  
53  
54  
55  
56  
57  
58  
59  
60

For peer review only

## 254 Supplementary eResults

255

256 Our analysis incorporated forty-four relevant studies. Key study and participant details are summarized in **eTable 1**,  
257 with a concise overview provided in the main text. Articles excluded based on our criteria are listed in **eTable 5**.

258

### 259 Diagnostic reliability of teledermatology when compared to F2F (specialist and non-specialists) evaluation

260

261 Of the 40 studies that reported diagnostic agreement rates there were 72 unique comparisons made between F2F and  
262 teledermatology.<sup>5-44</sup> **eFigure 1A** shows that the mean percentage agreement of 68.9% (CI 64.4%-73.1%) ranged from  
263 14% to 98%, where 35/72 had percentage agreement above 70% and 7 studies had over 90% agreement. The studies  
264 were heterogeneous ( $I^2=98%$ ,  $p < 0$ ).

265

266 Of the 21 studies that reported concordance values, there were 45 unique comparisons made.<sup>5 6 11 14 17 20-25 28 29 32-34 45-</sup>

267

268 <sup>49</sup> **eFigure 1B** shows that the mean diagnostic concordance of 0.67 (CI 0.60 to 0.74) ranged from 0.213 (CI 0.20 to  
269 0.23) to 0.96 (CI 0.92 to 0.98), with 21 studies (47%) having moderate agreement ( $k=0.6$  and above), and 13 (29%)  
270 studies having strong agreement. The studies were heterogeneous ( $I^2=100%$ ,  $p < 0.001$ ).

271

### 272 Diagnostic agreement between teledermatologist and teledermatologist, F2F and F2F, and teledermatology 273 and histopathology

274

275 Of the ten studies that reported diagnostic agreement rates between teledermatologists, there were 17 unique comparisons  
276 made between F2F and teledermatology consults. **eFigure 2A** shows the mean percentage agreement of 76.4% (CI  
277 69% to 82.5%) ranged from 37% to 91.5%, with 10/17 having percentage agreement above 70% and two studies  
278 having over 90% agreement. The studies were heterogeneous ( $I^2=97%$ ,  $p < 0.001$ ).

279

280 From four studies that reported diagnostic agreement rates between F2F dermatologists there were 6 unique  
281 comparisons. **eFigure 2B** shows that the mean percentage agreement 82.4% (CI 76.7%-87.0%) ranged from 75.5% to  
282 91%. The studies were heterogeneous ( $I^2=68%$ ,  $p < 0.001$ ).

283

284 Five studies compared teledermatology to histopathology data, and there were six unique comparisons. **eFigure 2C**  
285 shows that the mean percentage agreement of 55.7% (CI 53% to 58.4%) ranged from 53.8% to 65.4%. The mean  
286 agreement rate between histopathology and teledermatology was 55.7% (CI 53.0 to 58.4). The studies were  
287 homogeneous ( $I^2=0%$ ,  $p = 0.49$ ).

288

## 289 Subgroup analyses

290

### 291 Diagnostic reliability of teledermatology vs F2F specialist and non-specialist

292

293 Within the same modality, **eFigure 3A** shows that teledermatologists had a diagnostic agreement rate of 70.96% (CI  
294 69.8% to 72.1%) with F2F dermatologists, while the agreement rate with F2F non-specialists was 44.1% (CI 39.9%  
295 to 48.4%). Comparing teledermatologists to non-specialists showed significantly lower agreement among non-specialists  
296 ( $p < 0.001$ , heterogeneity:  $I^2 = 98%$ ). Among 35 studies reporting diagnostic agreement rates, 44 out of 64  
297 comparisons between teledermatology and F2F dermatologists had a percentage agreement above 60%, with seven  
298 studies reporting over 90% agreement. The mean kappa concordance value for diagnostic agreement between  
299 teledermatology and F2F dermatologists shown in **eFigure 3B** was 0.69 (CI 0.60 to 0.75). Additionally,  
300 teledermatologists had a mean concordance value of 0.52 (CI 0.25 to 0.71) when compared to non-specialists. Non-  
301 specialists showed significantly lower diagnostic concordance compared to dermatologists for F2F vs.  
302 teledermatology ( $p = 0.031$ , heterogeneity:  $I^2 = 100%$ ). Moreover, studies comparing teledermatologists to F2F and  
303 teledermatology to histopathology showed a range of agreement rates, with heterogeneity observed in the former ( $I^2$   
304  $= 97%$ ,  $p < 0.001$ ) and homogeneity in the latter ( $I^2 = 0%$ ,  $p = 0.49$ ).

305

### 306 Diagnostic reliability of teledermatology vs F2F by the inclusion of teledermoscopy in both teledermatology 307 and F2F assessments

308

309 Overall, twelve studies with 22 unique comparisons used teledermoscopy for diagnosing suspicious lesions.<sup>8 11 15 29 32</sup>  
310 <sup>34 38 39 42 44</sup> **eFigure 4A** shows that with teledermoscopy, the mean diagnostic agreement rates was 69.1% (CI 66.8% to  
311 71.4%), and this percentage ranged between from 31.6% to 92.3%. Without the use of teledermoscopy, the mean  
312 agreement rate was 68.3% (CI 66.8% to 69.8%). The means were not significantly different between the two groups  
313 and the studies were heterogeneous ( $I^2=97%$ ,  $p < 0.001$ ). **eFigure 4B** shows concordance values of seven studies that

314



1  
2  
3 310 adapted teledermoscopy had a mean of 0.71 (CI 0.58 to 0.80).<sup>11 29 32 34 39 47 48</sup> Without teledermoscopy, the mean was  
4 311 0.65 (CI 0.54 to 0.74). This difference was not statistically significant, and the studies were heterogeneous ( $I^2=100\%$ ,  
5 312  $p<0.001$ ).

### 6 313 7 314 **Diagnostic reliability of teledermatology vs F2F by the inclusion of lesion category**

8 315 Twenty-six studies with 39 unique comparisons reporting percentage agreement rates that were inclusive to all lesion  
9 316 types as shown in **eFigure 5A**.<sup>5-10 15-19 22 24-26 28-33 36 37 40 41 43</sup> The mean percentage agreement was 69.9% (CI 67.9% to  
10 317 71.7%) and ranged from 30.9% to 98%, with the majority (26/39) having percentage agreement above 60% and 4  
11 318 studies having over 90%. Eleven studies only looked at suspicious lesions,<sup>11 12 14 20 23 34 35 38 39 42 44</sup> and the mean  
12 319 percentage agreement was 68.1% (CI 66.3% to 69.8%). Three studies excluded skin cancers<sup>13 21 27</sup> and the mean  
13 320 percentage agreement was 62.2% (CI 56.2% to 67.8%). No statistical significance could be identified between the  
14 321 three lesion groups and the studies were heterogeneous ( $I^2=98\%$ ,  $p<0.001$ ).

15 322  
16 323 Concordance values for studies inclusive to all lesions seen in **eFigure 5B** were reported in ten studies with a mean  
17 324 of 0.62 (CI 0.48 to 0.74).<sup>5 6 17 22 24 25 28 29 32 33</sup> Six studies that looked at cancerous skin lesions only reported a mean of  
18 325 0.70 (CI 0.59 to 0.78).<sup>11 14 20 23 34 39</sup> Only one study that looked at all lesions except cancerous ones reported a  
19 326 concordance value.<sup>22</sup> No statistical significance could be identified between the three lesion groups and the studies  
20 327 were heterogeneous ( $I^2=100\%$ ,  $p<0.001$ ).

### 21 328 22 329 23 330 **Diagnostic reliability of teledermatology vs F2F by pre- and post-pandemic timelines**

24 331 When comparing teledermatologists to all F2F physicians, the average agreement rate was 65.5% (CI 64.0-66.9) for pre-  
25 332 pandemic studies, and 75.3% (CI 73.4% to 77.2%) for studies published after January 2020. When the percentage  
26 333 agreements were compared between the two groups, they were not statistically significant ( $p = 0.421$ ) and also  
27 334 heterogeneous ( $I^2=98\%$ ,  $p<0.001$ ). eTable not included.

### 28 335 29 336 30 337 **Risk of bias and quality assessment**

31 338 The QUADAS-2 framework was utilized to evaluate bias and applicability across four essential domains, ensuring  
32 339 that our conclusions are both accurate and applicable to real-life clinical situations. **eTable 6A** summarizes the  
33 340 QUADAS-2 criteria tailored to this study.

34 341  
35 342 The results of quality assessment for risk of bias and applicability in individual studies are displayed in **eTable 6B-**  
36 343 **E**. Six of the studies had low risk of bias, nine had moderate risk, and 29 had high-risk of bias. There were no  
37 344 systematic differences between the results of studies that attempted to reduce risk of bias, compared with those with  
38 345 higher risk of bias. The mean diagnostic agreement rate between F2F and teledermatology was 66.4% (CI 62.4% to  
39 346 70.1%) for low risk, and 69.1% (CI 67.6% to 70.6%) for high risk ( $p = 0.932$ ). When the percentage agreements were  
40 347 compared between groups, they were heterogeneous ( $I^2=98\%$ ,  $p<0.001$ ). eTable not included.



348 **Supplementary eFigures and Legends**

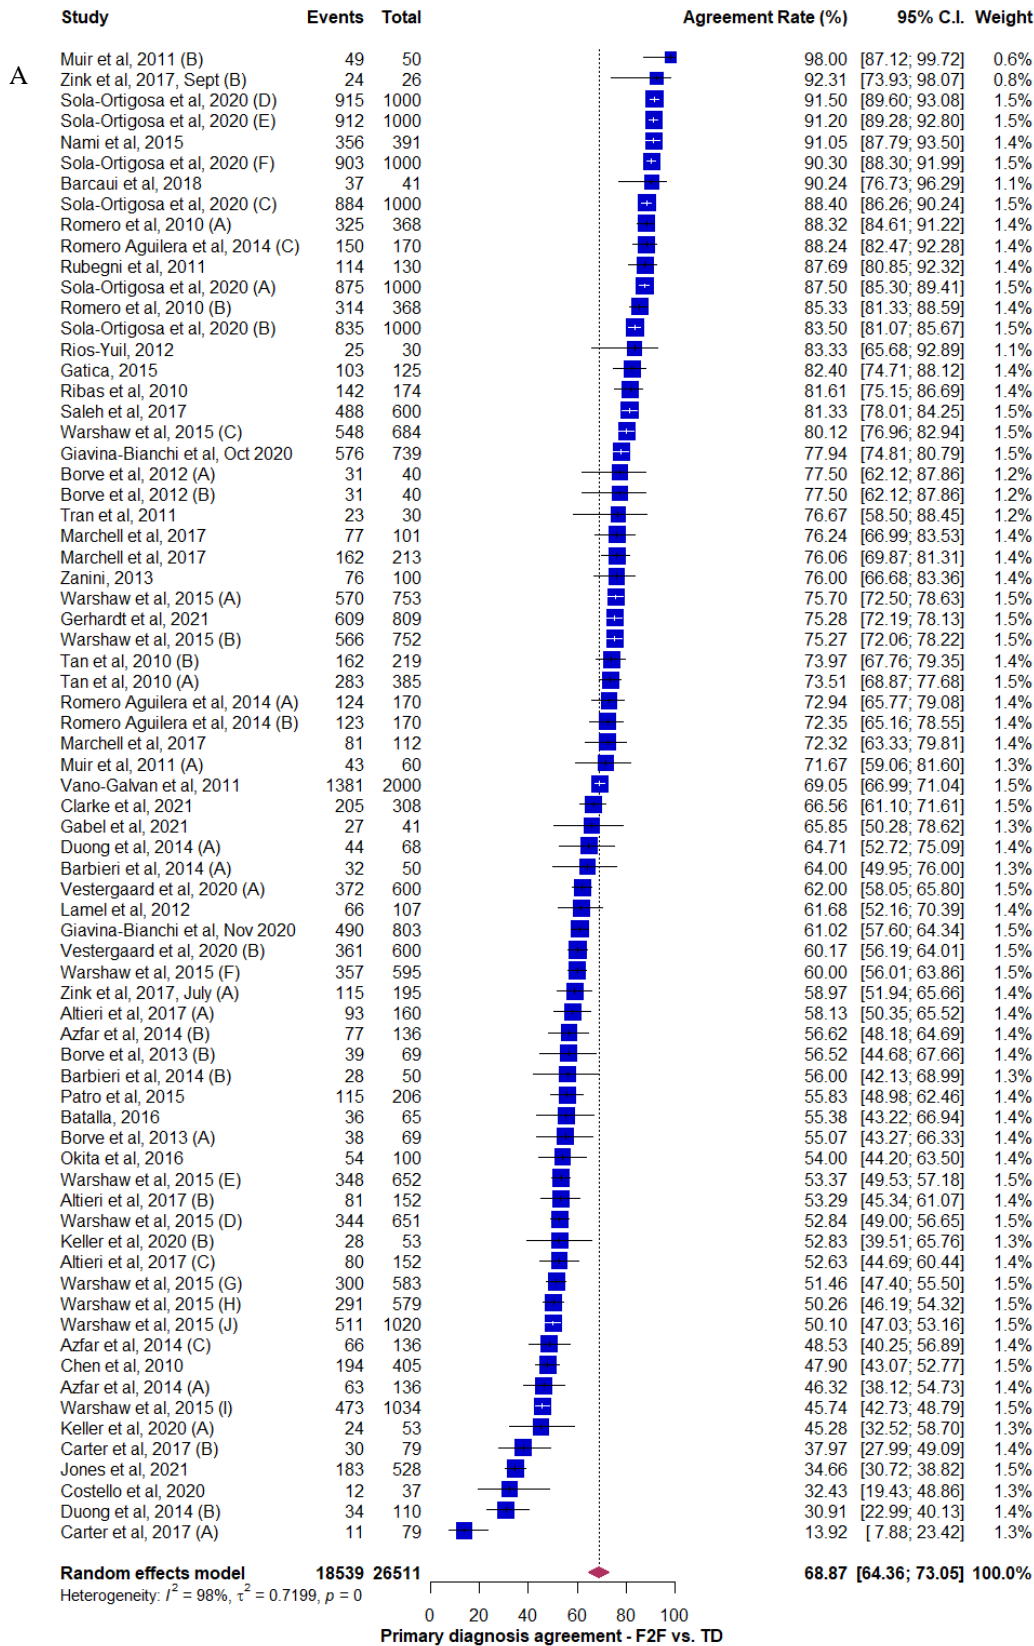

349

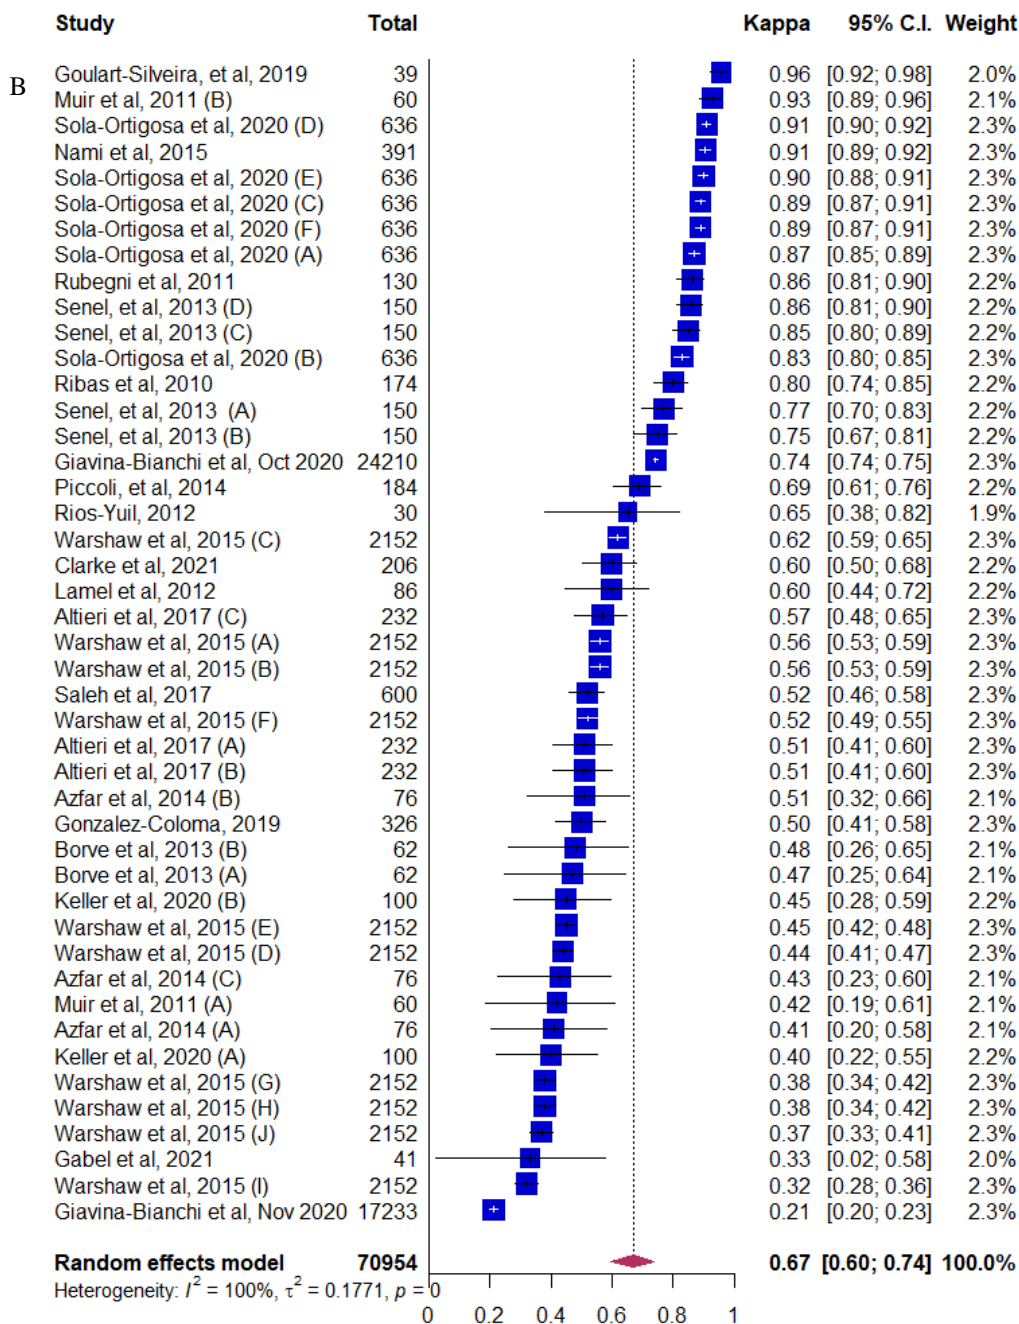

**eFigure 1. Forest plot representing F2F and teledermatology primary diagnostic agreement.** (A) Forest plot representing percentage agreement and 95% C.I. for overall concordance across 40 studies with a total of 72 unique number of comparisons, N of events and total included participants. (B) Forest plot representing kappa concordance and 95% C.I. for overall concordance across 21 studies with a total of 45 unique number of comparisons, N of total included participants. Abbreviations: F2F (Face-to-Face), PCP (Primary Care Provider), TD (Teledermatology or Teledermatologist).

1

2

3

4

5

6

7

8

9

10

11

12

13

14

15

16

17

18

19

20

21

22

23

24

25

26

27

28

29

30

31

32

33

34

35

36

37

38

39

40

41

42

43

44

45

46

47

48

49

50

51

52

53

54

55

56

57

58

59

60

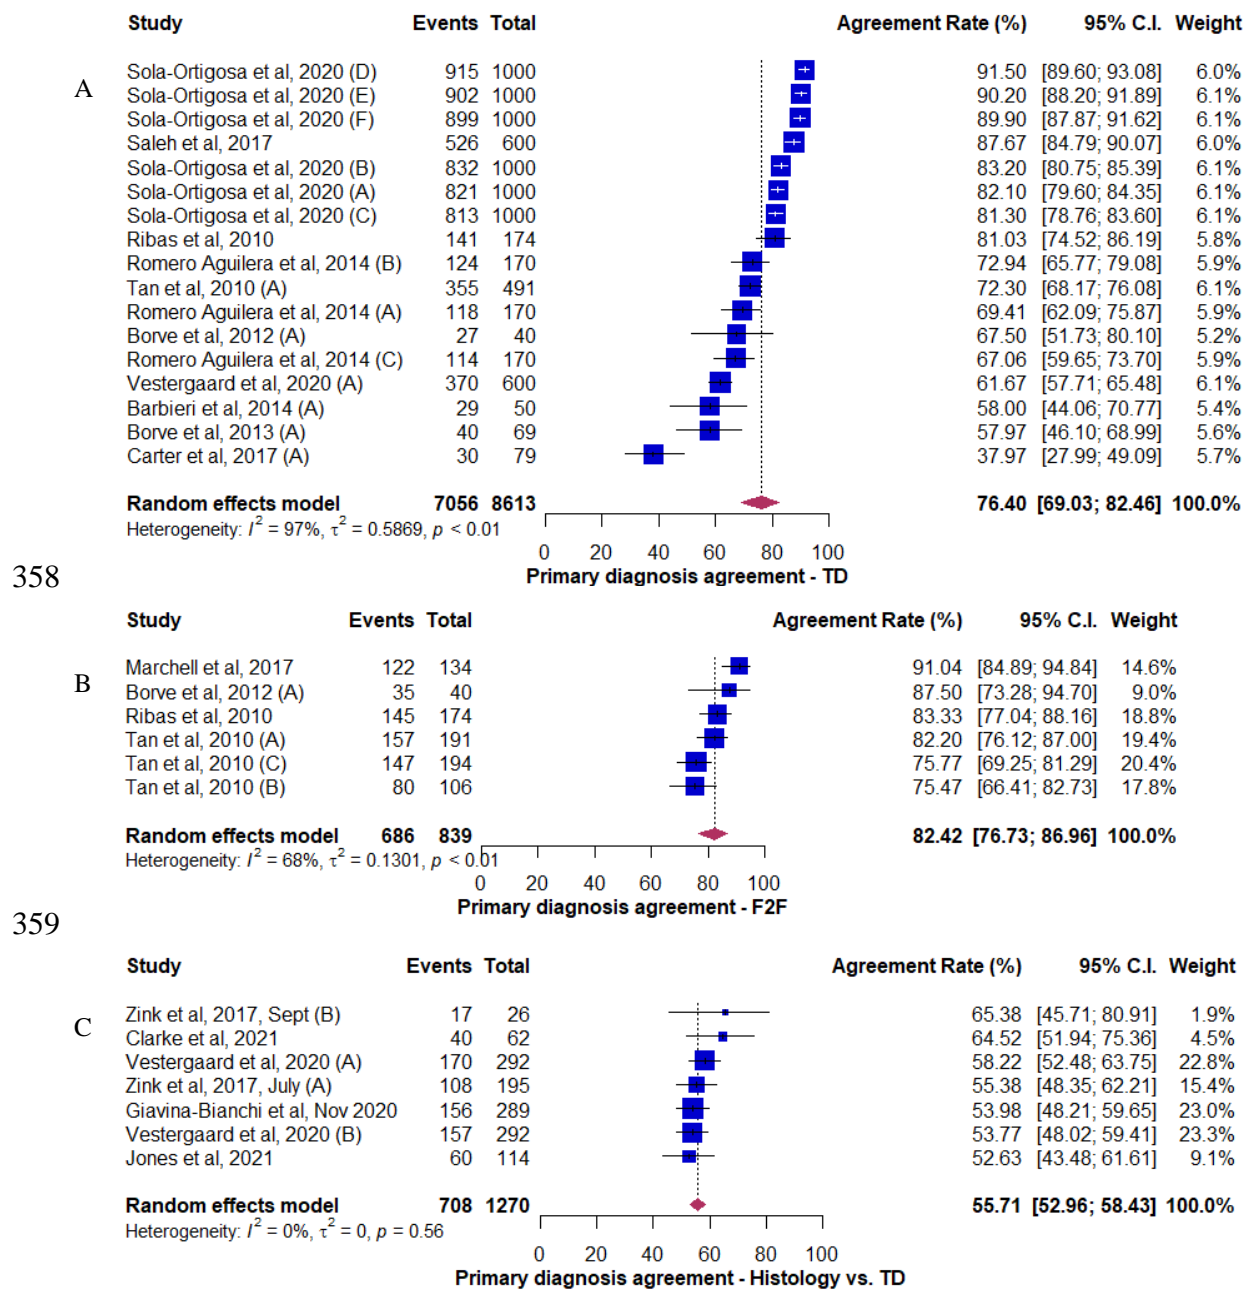

**360**  
**361** **eFigure 2. Forest plot representing teledermatologists, F2F physicians, and histopathology primary diagnostic**  
**362** **agreements.** (A) Forest plot representing percentage agreement between teledermatologist and teledermatologist and  
**363** 95% C.I. for overall concordance across ten studies with a total of 17 unique number of comparisons, N of events and  
**364** total included participants. (B) Forest plot representing kappa concordance and 95% C.I. for overall concordance  
**365** between two F2F physician diagnoses across four studies with a total of six unique number of comparisons, N of total  
**366** included participants. (C) Forest plot representing percentage agreement between teledermatologists and  
**367** histopathology with 95% C.I. for overall concordance across six studies, N of events and total included participants.  
**368** Abbreviations: F2F (Face-to-Face), PCP (Primary Care Provider), TD (Teledermatology or Teledermatologist).  
**369**

A

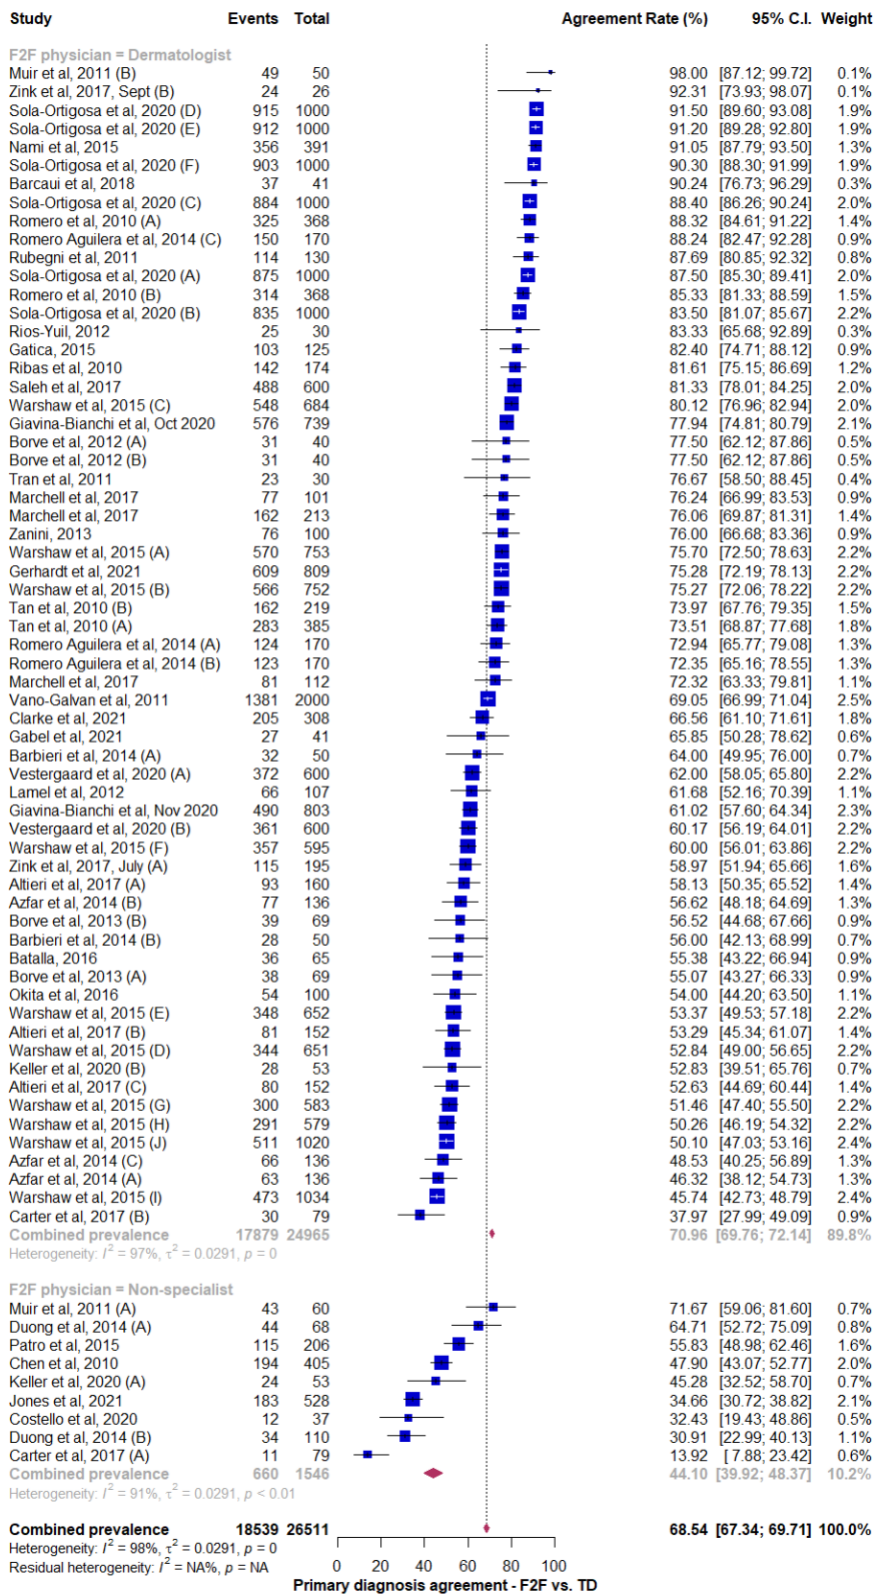

370

12



B

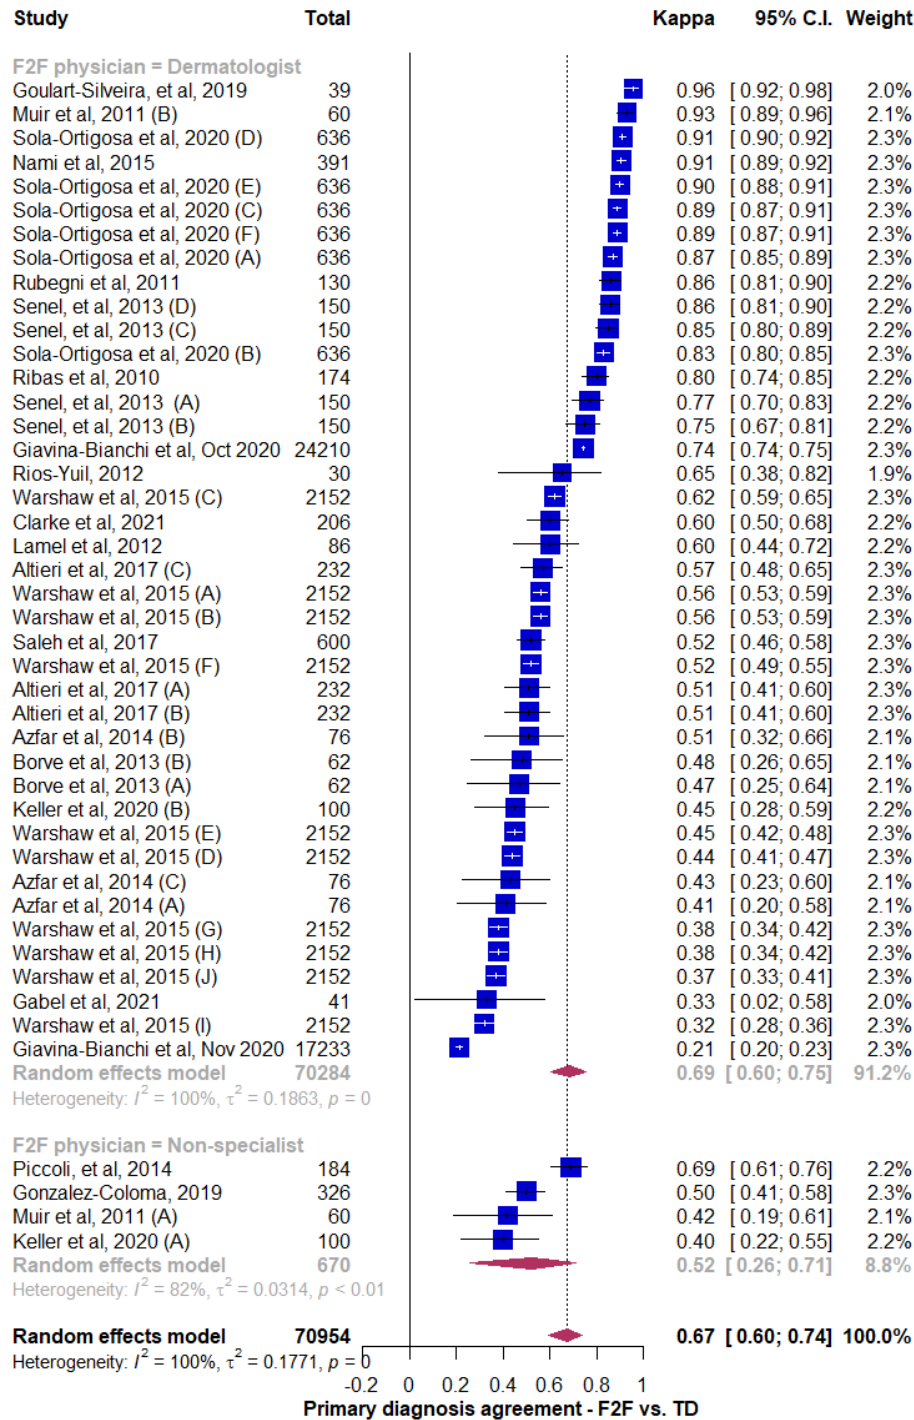

371  
 372 **eFigure 3. Forest plot representing F2F and teledermatology primary diagnostic agreement by specialization**  
 373 **status of the F2F physician.** Studies were sorted into two groups, a) F2F diagnosis completed by a board-certified  
 374 dermatologist; b) F2F diagnosis completed by a non-specialist (e.g., general practitioner). (A) Forest plot representing  
 375 percentage agreement and 95% C.I. for overall concordance across 40 studies with a total of 72 unique number of  
 376 comparisons, N of events and total included participants. (B) Forest plot representing kappa concordance and 95%  
 377 C.I. for overall concordance across 21 studies with a total of 45 unique number of comparisons, N of total included

378 participants. Abbreviations: F2F (Face-to-Face), PCP (Primary Care Provider), TD (Teledermatology or  
 379 Teledermatologist).

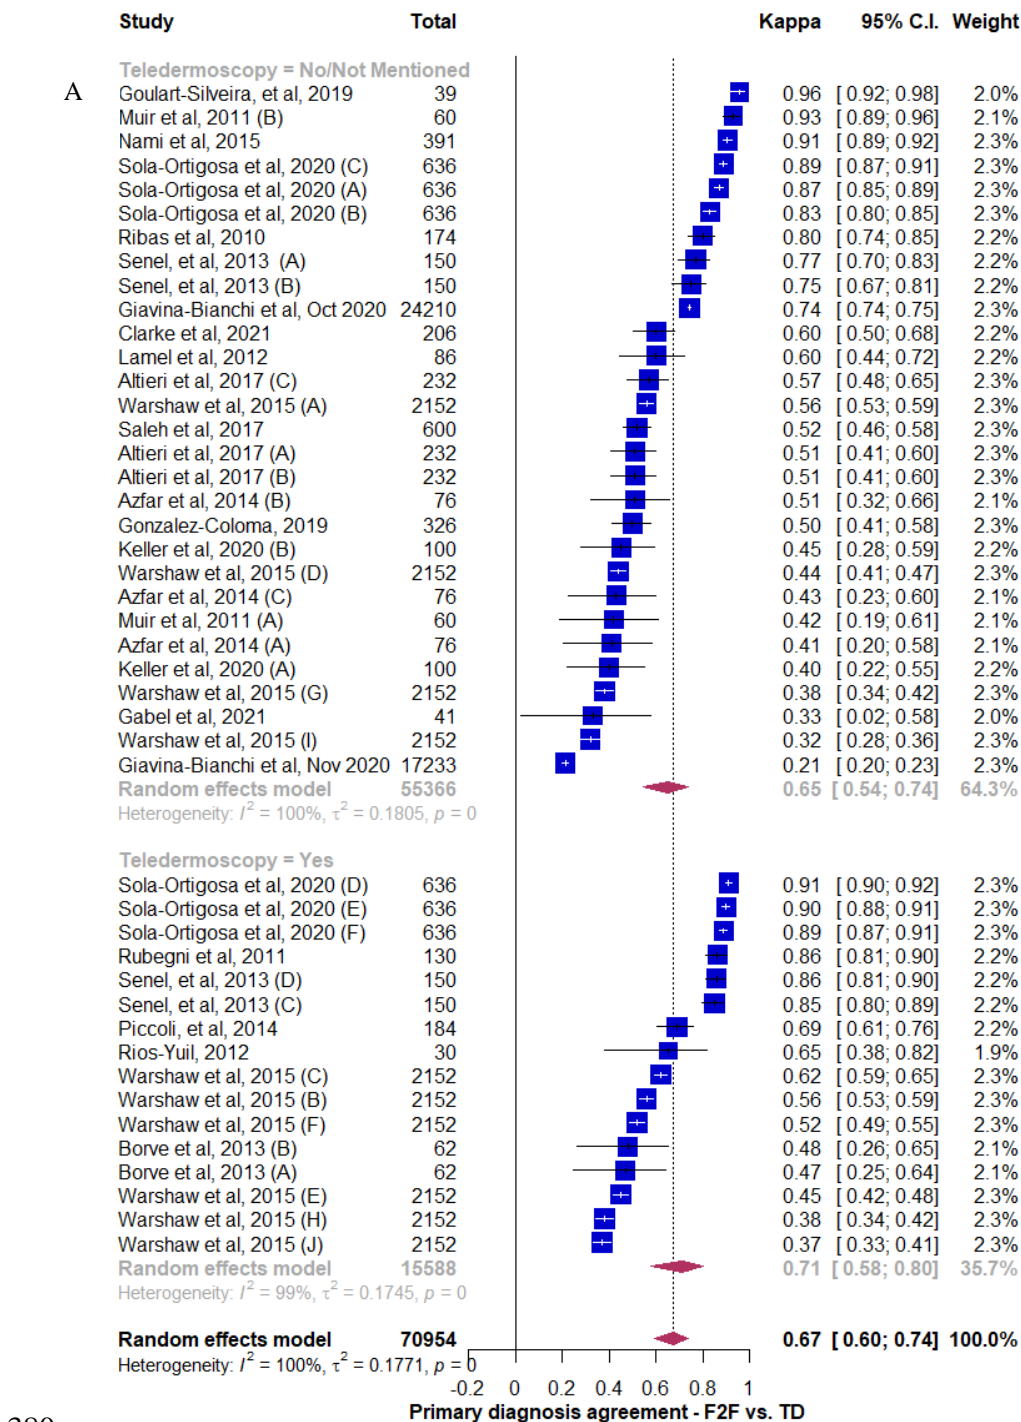

380  
 381 **eFigure 4. Forest plot representing F2F and teledermatology primary diagnostic agreement by utilization of**  
 382 **teledermoscopy.** Studies were sorted into two groups, i) Did not use or did not report the use of teledermoscopy; ii)  
 383 Used teledermoscopy. (A) Forest plot representing percentage agreement and 95% C.I. for overall concordance across  
 384 12 studies with a total of 22 unique number of comparisons, N of events and total included participants. (B) Forest  
 385 plot representing kappa concordance and 95% C.I. for overall concordance across seven studies with a total of 16  
 386 unique number of comparisons, N of total included participants. Abbreviations: F2F (Face-to-Face), PCP (Primary  
 387 Care Provider), TD (Teledermatology or Teledermatologist).

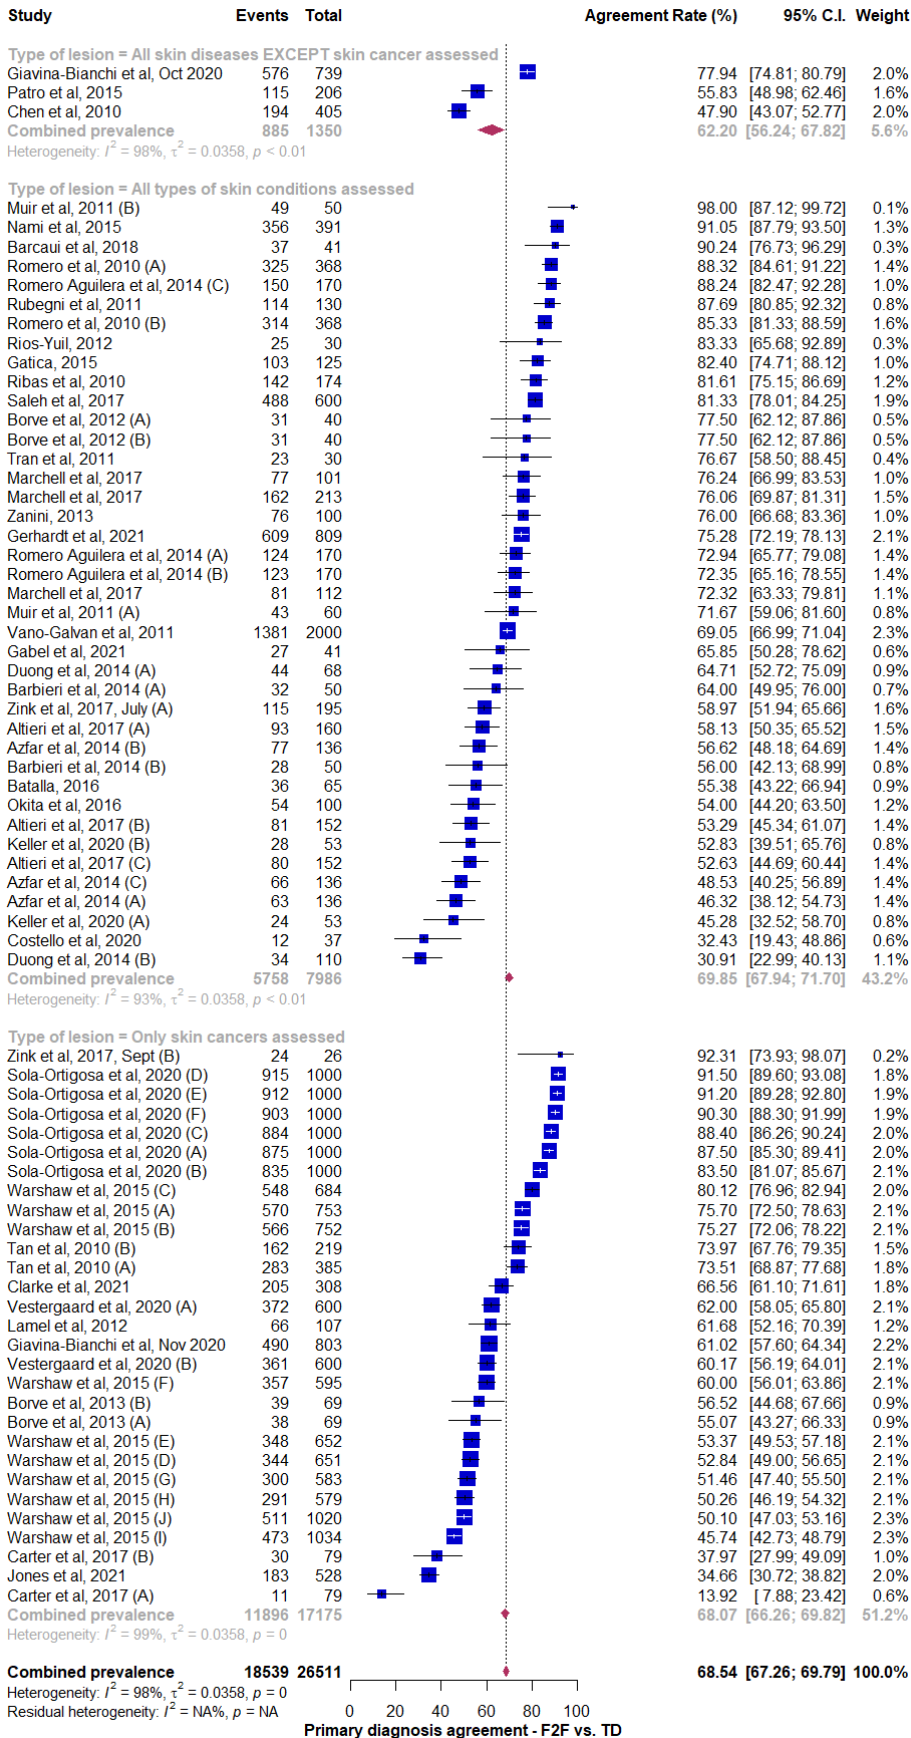

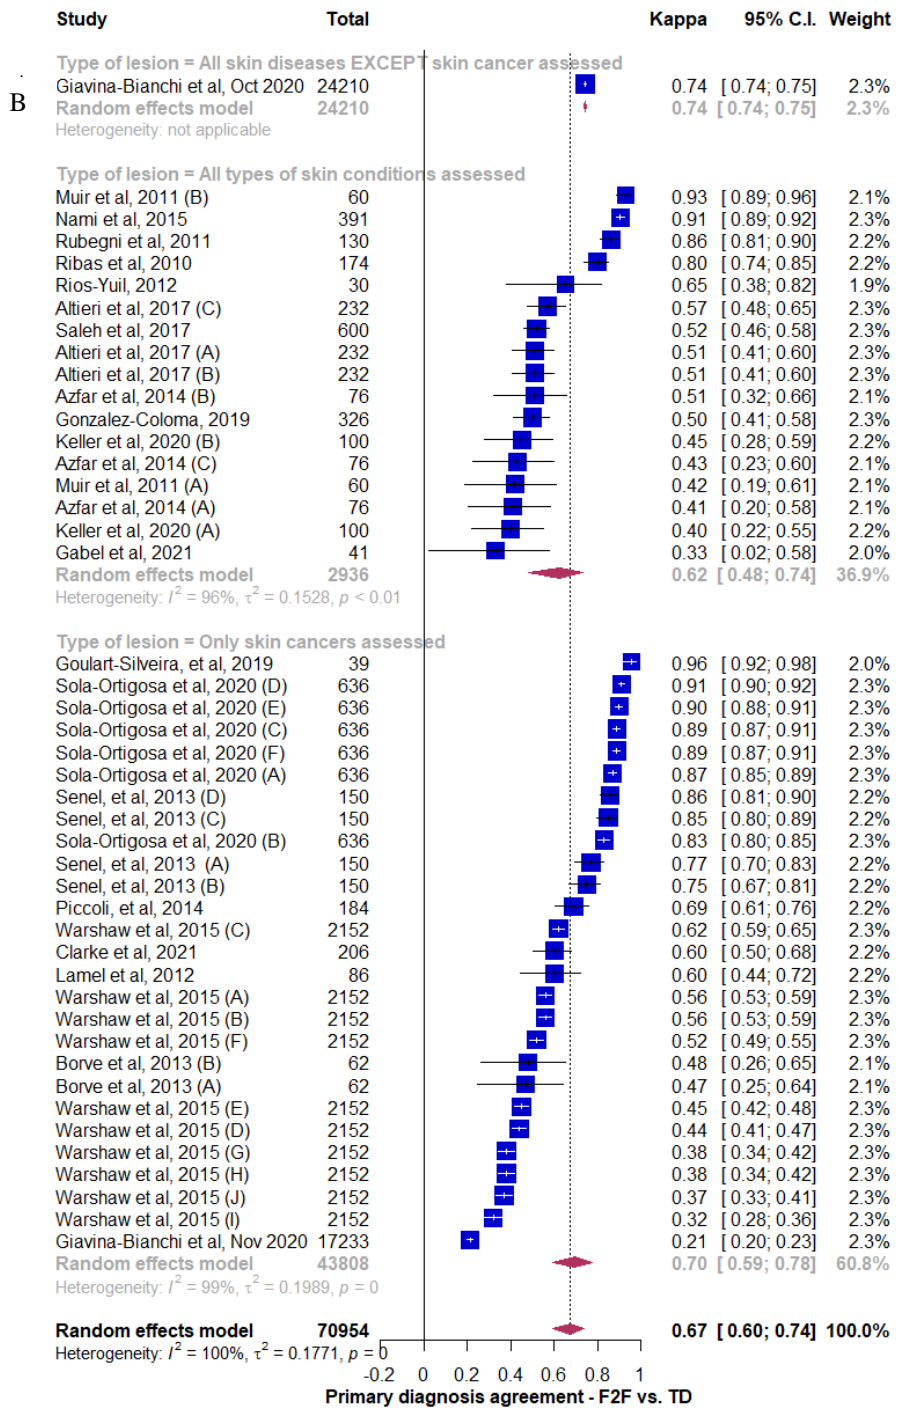

389  
390  
391  
392  
393  
394  
395  
396  
397

**eFigure 5. Forest plot representing F2F and teledermatology primary diagnostic agreement by skin lesion category.** Studies were sorted into three groups according to the type of lesions included, i) All skin conditions except likely malignant lesions; ii) All skin conditions; iii) Likely malignant lesions only. (A) Forest plot representing percentage agreement and 95% C.I. for overall concordance across 26 studies with a total of 39 unique number of comparisons, N of events and total included participants. (B) Forest plot representing kappa concordance and 95% C.I. for overall concordance across ten studies with a total of 27 unique number of comparisons, N of total included participants. Abbreviations: F2F (Face-to-Face), PCP (Primary Care Provider), TD (Teledermatology or Teledermatologist).



| Author, Year                   | Study design                   | Country           | Funding reported | Intervention                                                                                                                                            | *Outcome                                                              | Patients (n) | Female (%) | Mean Age (y) | Lesions (N) |  |
|--------------------------------|--------------------------------|-------------------|------------------|---------------------------------------------------------------------------------------------------------------------------------------------------------|-----------------------------------------------------------------------|--------------|------------|--------------|-------------|--|
| <b>TD vs F2F Dermatologist</b> |                                |                   |                  |                                                                                                                                                         |                                                                       |              |            |              |             |  |
| Altieri, et al, 2017           | Prospective Cohort             | USA               | Y                | TD and F2F dermatologists via clinical images taken by digital photography                                                                              | Diagnostic agreement rate, Concordance                                | 232          | N/A        | NA           | 232         |  |
| Azfar, et al, 2014             | Prospective Cohort             | USA, Botswana     | N                | TD and F2F dermatologists via smartphone images                                                                                                         | Diagnostic agreement rate, Concordance                                | 76           | 57         | 39           | 159         |  |
| Barbieri, et al, 2014          | Prospective Cohort             | USA               | N                | TD and F2F dermatologists via smartphone images using the AccessDerm smartphone platform                                                                | Diagnostic agreement rate                                             | 50           | 64         | 55.2         | 50          |  |
| Barcaui, et al, 2018           | Prospective Cohort             | Brazil            | N                | TD and F2F consult by the same dermatologist via digital photography and dermoscopy images stored in WhatsApp                                           | Diagnostic agreement rate                                             | 31           | 71         | 56.5         | 41          |  |
| Batalla, 2015                  | Retrospective Cohort           | Spain             | N                | TD and F2F dermatologists by via clinical images                                                                                                        | Diagnostic agreement rate                                             | 183          | 66         | 9            | 65          |  |
| Borve, et al, 2012             | Prospective Cohort             | Sweden            | Y                | TD and F2F consults by the same dermatologist via smartphone images stored in Tele-Dermis                                                               | Diagnostic agreement rate                                             | 40           | 57.5       | 49           | 40          |  |
| Gabel, et al, 2021             | Prospective Cohort             | USA               | Y                | TD and F2F dermatologists via clinical images taken by digital photography and tablets                                                                  | Diagnostic agreement rate, Concordance                                | 41           | N/A        | N/A          | 41          |  |
| Gatica, et al, 2015            | Prospective Cohort             | Chile             | N                | TD and F2F dermatologists via clinical images taken by digital photography                                                                              | Diagnostic agreement rate                                             | 125          | 57.6       | 37.7         | 125         |  |
| Gerhardt, et al, 2021          | Observational                  | USA               | Y                | TD and F2F dermatologists via clinical images                                                                                                           | Diagnostic agreement rate                                             | 809          | N/A        | N/A          | 809         |  |
| Keller, et al, 2020            | Prospective Cohort             | USA               | Y                | TD and F2F dermatologists or hospitalists on clinical images taken by smartphones and tablets                                                           | Diagnostic agreement rate, Concordance                                | 100          | 43.2       | N/A          | 100         |  |
| Marchell, et al., 2017         | Quasi RCT                      | USA               | Y                | TD and F2F dermatologists via digital photography, compressed and uncompressed video                                                                    | Diagnostic agreement rate (SFTD, video)                               | 216          | N/A        | N/A          | 216         |  |
| Muir, et al, 2011              | Prospective Cohort             | Australia         | N                | TD and F2F emergency derms and non-specialists via clinical images taken by digital photography                                                         | Diagnostic agreement rate, Concordance                                | 50           | 65         | 47           | 50          |  |
| Nami, et al, 2015              | Prospective Cohort             | Italy and Austria | Y                | TD and F2F dermatologists via smartphone images stored in MugDerma                                                                                      | Diagnostic agreement rate, Concordance                                | 391          | 52.2       | 54           | 391         |  |
| Okita, et al, 2016             | Prospective Cohort             | Brazil            | N                | TD and F2F dermatologists via smartphone images                                                                                                         | Diagnostic agreement rate                                             | 100          | N/A        | N/A          | 100         |  |
| Ribas, et al, 2010             | Prospective Cohort             | Brazil            | Y                | TD and F2F dermatologists via digital photography                                                                                                       | Diagnostic agreement rate, Concordance                                | 174          | 53.4       | 34.7         | 174         |  |
| Rios-Yuil, 2011                | RCT                            | Panama            | N                | TD and F2F dermatologists via clinical images taken by digital photography for case conferences                                                         | Diagnostic agreement rate, Concordance                                | 30           | 63.3       | N/A          | 30          |  |
| Romero Aguilera, et al, 2014   | Prospective Cohort             | Spain             | Y                | TD and F2F dermatologists via clinical images taken by digital photography stored in DERMARED. Some patients were seen by the same derm for F2F and TD. | Diagnostic agreement rate                                             | 457          | 56%        | 36           | 170         |  |
| Romero, et al, 2010            | RCT                            | Spain             | Y                | TD and F2F consults by the same dermatologist via digital photography and videoconferences via DERMARED software                                        | Diagnostic agreement rate                                             | 328          | 56%        | 36           | 510         |  |
| Rubegni, et al, 2011           | Prospective Cohort             | Italy             | N                | TD and F2F dermatologists via digital photography and dermoscopy images stored in Dermo-image.                                                          | Diagnostic agreement rate, Concordance                                | 130          | 53.9       | 80.6         | 130         |  |
| Saleh, et al, 2017             | Prospective Cohort             | Egypt             | Y                | TD and F2F dermatologists via clinical images taken by digital photography stored in Dropbox                                                            | Diagnostic agreement rate, Concordance                                | 600          | 50.7       | N/A          | 600         |  |
| Tran, et al, 2011              | Prospective Cohort             | Egypt             | Y                | TD and F2F dermatologists via smartphone images stored in ClickDoc                                                                                      | Diagnostic agreement rate                                             | 30           | N/A        | N/A          | 30          |  |
| Vano-Galvan, et al, 2010       | Retrospective, Cross-sectional | Spain             | N                | TD and F2F dermatologists via clinical images taken by digital photography for case conferences                                                         | Diagnostic agreement rate, 100 patients each analyzed by 20 observers | 100          | N/A        | N/A          | 100         |  |
| Zanini, 2013                   | Prospective Cohort             | Brazil            | N                | TD and F2F dermatologists via clinical images taken by digital photography                                                                              | Diagnostic agreement rate                                             | 100          | N/A        | N/A          | 100         |  |
| Zink, et al, 2017, July        | Prospective Cohort             | Germany           | Y                | TD and F2F dermatologists via smartphone images stored in the KLARA app                                                                                 | Diagnostic agreement rate                                             | 195          | 20.5       | N/A          | 195         |  |

All lesions

|                                  |                                   |             |                  |                                                                                                                           |                                                                    |              |            |              |             |                   |                  |    |    |    |    |    |    |    |    |    |    |    |    |    |    |    |    |    |    |    |    |    |    |    |    |    |    |    |    |    |    |    |    |    |    |    |
|----------------------------------|-----------------------------------|-------------|------------------|---------------------------------------------------------------------------------------------------------------------------|--------------------------------------------------------------------|--------------|------------|--------------|-------------|-------------------|------------------|----|----|----|----|----|----|----|----|----|----|----|----|----|----|----|----|----|----|----|----|----|----|----|----|----|----|----|----|----|----|----|----|----|----|----|
| 1                                | 2                                 | 3           | 4                | 5                                                                                                                         | 6                                                                  | 7            | 8          | 9            | 10          | 11                | 12               | 13 | 14 | 15 | 16 | 17 | 18 | 19 | 20 | 21 | 22 | 23 | 24 | 25 | 26 | 27 | 28 | 29 | 30 | 31 | 32 | 33 | 34 | 35 | 36 | 37 | 38 | 39 | 40 | 41 | 42 | 43 | 44 | 45 | 46 | 47 |
| Borve, et al, 2013               | Prospective Cohort                | Sweden      | Y                | TD and F2F consults by the same dermatologist via smartphone and dermoscopy images stored in iDoc 24 app                  | Diagnostic agreement rate, Concordance                             | 62           | 38.7       | 64           | 64          | Skin cancers only |                  |    |    |    |    |    |    |    |    |    |    |    |    |    |    |    |    |    |    |    |    |    |    |    |    |    |    |    |    |    |    |    |    |    |    |    |
| Carter, et al, 2017              | Prospective, retrospective cohort | USA         | Y                | TD and F2F dermatologists, as well as F2F PCP via clinical images stored using Epic EHR software                          | Diagnostic agreement rate                                          | 79           | 74         | 47           | 79          |                   |                  |    |    |    |    |    |    |    |    |    |    |    |    |    |    |    |    |    |    |    |    |    |    |    |    |    |    |    |    |    |    |    |    |    |    |    |
| Clarke, et al, 2021              | Prospective Cohort                | USA         | Y                | TD and F2F dermatologists via clinical images taken by digital photography stored in Research Electronic Data Capture     | Diagnostic agreement rate, Concordance                             | 206          | 49.5       | 56.9         | 308         |                   |                  |    |    |    |    |    |    |    |    |    |    |    |    |    |    |    |    |    |    |    |    |    |    |    |    |    |    |    |    |    |    |    |    |    |    |    |
| Giavina-Bianchi, et al, 2020 Nov | Retrospective Cohort              | Brazil      | N                | TD and F2F dermatologists via smartphone images                                                                           | Diagnostic agreement rate, Concordance                             | 17,233       | 71.4       | N/A          | 803         |                   |                  |    |    |    |    |    |    |    |    |    |    |    |    |    |    |    |    |    |    |    |    |    |    |    |    |    |    |    |    |    |    |    |    |    |    |    |
| Goulart-Silveira et al, 2019     | Prospective Cohort                | Brazil      | N                | TD and F2F dermatologists via smartphone images acquired and stored via Telederma app                                     | Concordance                                                        | 39           | 69         | 68           | 39          |                   |                  |    |    |    |    |    |    |    |    |    |    |    |    |    |    |    |    |    |    |    |    |    |    |    |    |    |    |    |    |    |    |    |    |    |    |    |
| Lamel, et al, 2012               | Prospective Cohort                | USA         | N                | TD and F2F dermatologists via smartphone images stored in ClickDerm                                                       | Diagnostic agreement rate, Concordance                             | 86           | 58.1       | 45.2         | 107         |                   |                  |    |    |    |    |    |    |    |    |    |    |    |    |    |    |    |    |    |    |    |    |    |    |    |    |    |    |    |    |    |    |    |    |    |    |    |
| Senel, et al, 2013               | Prospective Cohort                | Turkey      | N                | TD and F2F dermatologists via digital photography and dermoscopy images                                                   | Concordance with and without dermoscopy                            | 150          | 49         | 55           | 150         |                   |                  |    |    |    |    |    |    |    |    |    |    |    |    |    |    |    |    |    |    |    |    |    |    |    |    |    |    |    |    |    |    |    |    |    |    |    |
| Sola-Ortigosa, et al, 2020       | Prospective Cohort                | Spain       | N                | TD and F2F consults by the same dermatologist via dermoscopy and clinical images taken by digital photography and tablets | Diagnostic agreement rate, Concordance                             | 636          | 43.2       | 72.8         | 1,000       |                   |                  |    |    |    |    |    |    |    |    |    |    |    |    |    |    |    |    |    |    |    |    |    |    |    |    |    |    |    |    |    |    |    |    |    |    |    |
| Tan, et al, 2010                 | Prospective Cohort                | New Zealand | Y                | TD and F2F consults by the same dermatologist via digital photography                                                     | Diagnostic agreement rate                                          | 200          | 63         | N/A          | 491         |                   |                  |    |    |    |    |    |    |    |    |    |    |    |    |    |    |    |    |    |    |    |    |    |    |    |    |    |    |    |    |    |    |    |    |    |    |    |
| Vestergaard, et al, 2020         | Prospective Cohort                | Denmark     | N                | TD and F2F dermatologists via smartphone and dermoscopy images using FotoFinder Systems                                   | Diagnostic agreement rate, Concordance                             | 519          | 57         | 55           | 600         |                   |                  |    |    |    |    |    |    |    |    |    |    |    |    |    |    |    |    |    |    |    |    |    |    |    |    |    |    |    |    |    |    |    |    |    |    |    |
| Warshaw, et al, 2015             | Prospective, Cross-sectional      | USA         | N                | TD and F2F dermatologists via digital photography and dermoscopy images                                                   | Diagnostic agreement rate, Concordance                             | 2,152        | 3.2        | 68           | 3,021       |                   |                  |    |    |    |    |    |    |    |    |    |    |    |    |    |    |    |    |    |    |    |    |    |    |    |    |    |    |    |    |    |    |    |    |    |    |    |
| Zink, et al, 2017, Sept          | Prospective Cohort                | Germany     | Y                | TD and F2F dermatologists via smartphone and dermoscopy images using Handyfotos                                           | Diagnostic agreement rate                                          | 26           | N/A        | N/A          | 26          |                   |                  |    |    |    |    |    |    |    |    |    |    |    |    |    |    |    |    |    |    |    |    |    |    |    |    |    |    |    |    |    |    |    |    |    |    |    |
| Giavina-Bianchi, et al, 2020 Oct | Retrospective Cohort              | Brazil      | N                | TD and F2F dermatologists via smartphone images                                                                           | Diagnostic agreement rate, Concordance                             | 24,210       | 70         | N/A          | 739         |                   | B.               |    |    |    |    |    |    |    |    |    |    |    |    |    |    |    |    |    |    |    |    |    |    |    |    |    |    |    |    |    |    |    |    |    |    |    |
| Author, Year                     | Study design                      | Country     | Funding reported | Intervention                                                                                                              | *Outcome                                                           | Patients (n) | Female (%) | Mean Age (y) | Lesions (N) |                   |                  |    |    |    |    |    |    |    |    |    |    |    |    |    |    |    |    |    |    |    |    |    |    |    |    |    |    |    |    |    |    |    |    |    |    |    |
| <b>TD vs F2F Non-specialist</b>  |                                   |             |                  |                                                                                                                           |                                                                    |              |            |              |             |                   |                  |    |    |    |    |    |    |    |    |    |    |    |    |    |    |    |    |    |    |    |    |    |    |    |    |    |    |    |    |    |    |    |    |    |    |    |
| Costello, et al, 2019            | Prospective Cross-sectional       | USA         | Y                | TD and F2F PCP via smartphone and dermoscopy images using the Photo Exam app                                              | Diagnostic agreement rate                                          | 37           | 65         | 47.9         | 37          |                   | All skin lesions |    |    |    |    |    |    |    |    |    |    |    |    |    |    |    |    |    |    |    |    |    |    |    |    |    |    |    |    |    |    |    |    |    |    |    |
| Duong, et al, 2014               | Observational                     | France      | Y                | TD and F2F emergency physicians via smartphone images and videoconferences                                                | Diagnostic agreement rate (SFTD, video)                            | 194          | N/A        | N/A          | 178         |                   |                  |    |    |    |    |    |    |    |    |    |    |    |    |    |    |    |    |    |    |    |    |    |    |    |    |    |    |    |    |    |    |    |    |    |    |    |
| Gonzalez-Coloma, et al, 2019     | Prospective, Cross-sectional      | Chile       | N                | TD and F2F PCP via clinical images                                                                                        | Diagnostic concordance                                             | 326          | 59         | 35.8         | 326         |                   |                  |    |    |    |    |    |    |    |    |    |    |    |    |    |    |    |    |    |    |    |    |    |    |    |    |    |    |    |    |    |    |    |    |    |    |    |
| Keller, et al, 2020              | Prospective Cohort                | USA         | Y                | TD and F2F dermatologists or hospitalists on clinical images taken by smartphones and tablets                             | Diagnostic agreement rate, Concordance                             | 100          | 43.2       | N/A          | 100         |                   |                  |    |    |    |    |    |    |    |    |    |    |    |    |    |    |    |    |    |    |    |    |    |    |    |    |    |    |    |    |    |    |    |    |    |    |    |
| Muir, et al, 2011                | Prospective Cohort                | Australia   | N                | TD and F2F emergency physicians via clinical images taken by digital photography                                          | Diagnostic agreement rate, Concordance                             | 60           | 65         | 47           | 60          |                   |                  |    |    |    |    |    |    |    |    |    |    |    |    |    |    |    |    |    |    |    |    |    |    |    |    |    |    |    |    |    |    |    |    |    |    |    |
| Carter, et al, 2017              | Prospective, retrospective cohort | USA         | Y                | TD and F2F dermatologists, as well as F2F PCP via clinical images stored using Epic EHR software                          | Diagnostic agreement rate                                          | 79           | 74         | 47           | 79          | Skin cancers only |                  |    |    |    |    |    |    |    |    |    |    |    |    |    |    |    |    |    |    |    |    |    |    |    |    |    |    |    |    |    |    |    |    |    |    |    |
| Jones, et al, 2021               | Retrospective Cohort              | New Zealand | Y                | TD and F2F PCP via digital photography and dermoscopy images                                                              | SSC matched for age, sex, and ethnicity. Diagnostic agreement rate | 481          | 64         | N/A          | 528         |                   |                  |    |    |    |    |    |    |    |    |    |    |    |    |    |    |    |    |    |    |    |    |    |    |    |    |    |    |    |    |    |    |    |    |    |    |    |
| Piccoli, et al, 2015             | Retrospective Cross-sectional     | Brazil      | Y                | TD and F2F PCP via digital photography and dermoscopy images                                                              | Diagnostic concordance                                             | 184          | 73.4       | 54.7         | 184         |                   |                  |    |    |    |    |    |    |    |    |    |    |    |    |    |    |    |    |    |    |    |    |    |    |    |    |    |    |    |    |    |    |    |    |    |    |    |
| Chen, et al, 2010                | Retrospective Cohort              | USA         | Y                | TD and F2F PCP via clinical images stored in Second Opinion Software                                                      | Diagnostic agreement rate                                          | 405          | 50.6       | 5.9          | 405         | B.                |                  |    |    |    |    |    |    |    |    |    |    |    |    |    |    |    |    |    |    |    |    |    |    |    |    |    |    |    |    |    |    |    |    |    |    |    |
| Patro, et al 2015                | Prospective Cohort                | India       | Y                | TD and F2F PCP via digital photography                                                                                    | Diagnostic agreement rate                                          | 206          | 58.7       | N/A          | 206         |                   |                  |    |    |    |    |    |    |    |    |    |    |    |    |    |    |    |    |    |    |    |    |    |    |    |    |    |    |    |    |    |    |    |    |    |    |    |

**eTable 1. Study and patient characteristics for all included studies.** The table is divided into two sections: one comparing teledermatology with Face-to-Face (F2F) dermatologists, and another comparing teledermatologists with F2F non-specialists. The studies are listed alphabetically and grouped by lesion type. \*See supplementary **eTable 4** for agreement rates and

Page 51 of 72  
confidence values. Abbreviations used in the table include B (Benign lesions only), ED (Emergency Department), EHR (Electronic Health Record), F2F (Face-to-Face), Histo (Histopathology), ICD10 (International Classification of Diseases, 10th Edition), N (No), N/A (Not available), PCP (Primary Care Provider), PLD (Polarized Light Dermoscopy), RCT (Randomized Controlled Trial), SFTD (Store-and-Forward Teledermatology), SSC (Specialized Skin Clinic), TD (Teledermatology or Teledermatologist), and Y (Yes). Patient characteristics for all 44 included studies are also provided, grouped by lesion type, with a column describing special inclusion and exclusion criteria.

2  
3  
4  
5  
6  
7  
8  
9  
10  
11  
12  
13  
14  
15  
16  
17  
18  
19  
20  
21  
22  
23  
24  
25  
26  
27  
28  
29  
30  
31  
32  
33  
34  
35  
36  
37  
38  
39  
40  
41  
42  
43  
44  
45  
46  
47

For peer review only

398

| Inclusion criteria                                                                                                                                                                   | Exclusion criteria                                                                                                                                                                                                                                |
|--------------------------------------------------------------------------------------------------------------------------------------------------------------------------------------|---------------------------------------------------------------------------------------------------------------------------------------------------------------------------------------------------------------------------------------------------|
| Primary articles assessing diagnostic agreement where store-and-forward technology or live video conference consults were compared with a control group who attend in-person visits. | Survey articles, feasibility studies, studies regarding other forms of telemedicine unrelated to dermatology, cost-effectiveness studies, editorials, and review articles.                                                                        |
| Primarily comparing teledermatology to F2F, sometimes using histopathology as the reference standard.                                                                                | Studies that clearly stated they used telematologists as the gold- or reference standard.<br><br>Studies that only compared dermatoscopic images in the absence of clinical images.<br><br>Studies where patients captured their own photographs. |

399 **eTable 2. Inclusion and exclusion criteria for screening of literature search results.**

400 F2F: Face-to-Face.

401

402

403

### Study characteristics

Author, year, title, study type, objective, country of publication. Patient characteristics: total number of participants included declaration of funding source, number of participants per study, mean age +/- SD, age range, gender, mean BMI and range, race/ethnicity, type of lesions evaluated, type of patients evaluated.

### Methodology - teledermatology and F2F consults

Method of correspondence, platform used for the teledermatology consult, training on teledermatology platform, length of teledermatology and F2F consult, experience of the teledermatologist and F2F physician, location of the teledermatologist, number of teledermatologists and F2F physicians who made a diagnosis for each patient, total number of telematologists and F2F physicians in study, order of visits, wait time between teledermatology and F2F consult, whether same specialist conducted teledermatology and F2F visit, specialization of the F2F physician, number of reviews; qualifications of the individual who acquired the clinical photographs and whether they received additional training on taking clinical photographs.

### Metrics and results

Technology used for image acquisition and for viewing images with, distance between camera and lesion, number of images taken, use of teledermoscopy & dermoscopy, brand of dermatoscope, use of histopathology, referral content provided to teledermatologist, primary and differential diagnoses agreement and concordance rates, diagnostic accuracy values (if available) such as sensitivity, specificity, PPV and NPV.

404 **eTable 3. Data extraction form with details of domains record.**

405 F2F: Face-to-Face, PPV: Positive Predictive Value, NPV: Negative Predictive Value.

1  
2  
3  
4  
5  
6  
7  
8  
9  
10  
11  
12  
13  
14  
15  
16  
17  
18  
19  
20  
21  
22  
23  
24  
25  
26  
27  
28  
29  
30  
31  
32  
33  
34  
35  
36  
37  
38  
39  
40  
41  
42  
43  
44  
45  
46  
47

| Author and Year          | Unique Study Grouping | Participants (n) | Lesions (N) | Primary Diagnosis Agreement F2F vs F2F (n/n) | Diagnosis Agreement (N) / Total Diagnoses (N) | Primary Diagnosis Agreement TD vs TD (n/n) | Diagnosis Agreement (N) / Total Diagnoses (N) | Primary Diagnosis Agreement TD vs F2F (n/n) | Diagnosis Agreement (N) / Total Diagnoses (N) | Primary Diagnosis Agreement TD vs F2F (n/n) | Diagnosis Agreement (N) / Total Diagnoses (N) | Primary Diagnosis Kappa Value TD vs F2F | Primary Diagnosis Kappa Value TD vs Histo |
|--------------------------|-----------------------|------------------|-------------|----------------------------------------------|-----------------------------------------------|--------------------------------------------|-----------------------------------------------|---------------------------------------------|-----------------------------------------------|---------------------------------------------|-----------------------------------------------|-----------------------------------------|-------------------------------------------|
| Altieri et al, 2017 (A)  | F2F Derm vs TD1       | 232              | 232         |                                              |                                               |                                            |                                               | 58                                          | 93/160                                        |                                             |                                               | 0.51                                    |                                           |
| Altieri et al, 2017 (B)  | F2F Derm vs TD2       | 232              | 232         |                                              |                                               |                                            |                                               | 53                                          | 81/152                                        |                                             |                                               | 0.51                                    |                                           |
| Altieri et al, 2017 (C)  | F2F Derm vs TD3       | 232              | 232         |                                              |                                               |                                            |                                               | 53                                          | 80/152                                        |                                             |                                               | 0.57                                    |                                           |
| Azfar et al, 2014 (A)    | F2F Derm vs TD1       | 76               | 159         |                                              |                                               |                                            |                                               | 47                                          | 63/136                                        |                                             |                                               | 0.41                                    |                                           |
| Azfar et al, 2014 (B)    | F2F Derm vs TD2       | 76               | 159         |                                              |                                               |                                            |                                               | 57                                          | 77/136                                        |                                             |                                               | 0.51                                    |                                           |
| Azfar et al, 2014 (C)    | F2F Derm vs TD3       | 76               | 159         |                                              |                                               |                                            |                                               | 49                                          | 66/136                                        |                                             |                                               | 0.43                                    |                                           |
| Barbieri et al, 2014 (A) | F2F Derm vs TD1       | 50               | 50          |                                              |                                               | 58                                         | 29/50                                         | 64                                          | 32/50                                         |                                             |                                               |                                         |                                           |
| Barbieri et al, 2014 (B) | F2F Derm vs TD2       | 50               | 50          |                                              |                                               |                                            |                                               | 56                                          | 28/50                                         |                                             |                                               |                                         |                                           |
| Barcaui et al, 2018      | F2F Derm vs TD        | 31               | 41          |                                              |                                               |                                            |                                               | 90                                          | 37/41                                         |                                             |                                               |                                         |                                           |
| Batalla, 2016            | F2F Derm vs TD        | 183              | 183         |                                              |                                               |                                            |                                               | 55                                          | 36/65                                         |                                             |                                               |                                         |                                           |
| Borve et al, 2012 (A)    | F2F Derm vs TD1       | 40               | 40          | 88                                           | 35/40                                         | 68                                         | 27/40                                         | 78                                          | 31/40                                         |                                             |                                               |                                         |                                           |
| Borve et al, 2012 (B)    | F2F Derm vs TD2       | 40               | 40          |                                              |                                               |                                            |                                               | 78                                          | 31/40                                         |                                             |                                               |                                         |                                           |

|                                 |                                                          |       |       |    |       |    |         |      |         |
|---------------------------------|----------------------------------------------------------|-------|-------|----|-------|----|---------|------|---------|
| Borve et al, 2013 (A)           | F2F Derm vs TD1                                          | 62    | 69    | 58 | 40/69 | 55 | 38/69   | 0.47 | 0.51    |
| Borve et al, 2013 (B)           | F2F Derm vs TD2                                          | 62    | 69    |    |       | 57 | 39/69   | 0.48 |         |
| Carter et al, 2017 (A)          | F2F nonspecialist vs TD                                  | 79    | 79    | 38 | 30/79 | 14 | 11/79   |      |         |
| Carter et al, 2017 (B)          | F2F Derm vs TD                                           | 79    | 79    |    |       | 38 | 30/79   |      |         |
| Chen et al, 2010                | F2F nonspecialist vs TD                                  | 405   | 405   |    |       | 48 | 194/405 |      |         |
| Clarke et al, 2021              | F2F Derm vs TD                                           | 206   | 308   |    |       | 67 | 205/308 | 65   | 40/62   |
| Costello et al, 2020            | F2F nonspecialist vs TD                                  | 37    | 37    |    |       | 32 | 12/37   |      |         |
| Duong et al, 2014 (A)           | F2F nonspecialist vs TD (Videoconference)                | 111   | 110   |    |       | 65 | 44/68   |      |         |
| Duong et al, 2014 (B)           | F2F nonspecialist vs TD (SFTD)                           | 111   | 110   |    |       | 31 | 34/110  |      |         |
| Gabel et al, 2021               | F2F Derm vs TD                                           | 41    | 41    |    |       | 67 | 27/41   | 0.33 |         |
| Gatica, 2015                    | F2F Derm vs TD                                           | 125   | 125   |    |       | 82 | 103/125 |      |         |
| Gerhardt et al, 2021            | F2F Derm vs TD                                           | 809   | 809   |    |       | 75 | 609809  |      |         |
| Giavina-Bianchi et al, Nov 2020 | F2F Derm vs TD                                           | 17233 | 17233 |    |       | 61 | 490/803 | 54   | 156/289 |
| Giavina-Bianchi et al, Oct 2020 | F2F Derm vs TD                                           | 24210 | 27519 |    |       | 78 | 576/739 | 0.21 | 0.09    |
| Gonzalez-Coloma, 2019           | F2F nonspecialist vs TD                                  | 326   | 326   |    |       |    |         | 0.5  |         |
| Goulart-Silveira, et al, 2019   | F2F Derm vs TD                                           | 39    | 39    |    |       |    |         | 0.96 | 0.56    |
| Jones et al, 2021               | F2F nonspecialist vs TD (Suspicious Skin Cancer pathway) | NA    | 528   |    |       | 35 | 183/528 | 53   | 60/114  |
| Keller et al, 2020 (A)          | F2F nonspecialist vs TD                                  | 100   | 100   |    |       | 45 | 24/53   | 0.4  |         |
| Keller et al, 2020 (B)          | F2F Derm vs TD                                           | 100   | 100   |    |       | 53 | 28/53   | 0.45 |         |
| Lamel et al, 2012               | F2F Derm vs TD                                           | 86    | 107   |    |       | 62 | 66/107  | 0.6  |         |

|                                 |                                             |     |     |    |         |    |         |    |         |    |           |
|---------------------------------|---------------------------------------------|-----|-----|----|---------|----|---------|----|---------|----|-----------|
| Marchell et al, 2017            | F2F Derm vs TD (SFTD)                       | 216 | 216 | 91 | 122/134 |    |         | 76 | 162/213 |    |           |
| Marchell et al, 2017            | F2F Derm vs TD (Uncompressed video)         | 216 | 216 |    |         |    |         | 76 | 77/101  |    |           |
| Marchell et al, 2017            | F2F Derm vs TD (Compressed video)           | 216 | 216 |    |         |    |         | 72 | 81/112  |    |           |
| Muir et al, 2011 (A)            | F2F nonspecialist vs TD                     | 60  | 60  |    |         |    |         | 72 | 43/60   |    | 0.42      |
| Muir et al, 2011 (B)            | F2F Derm vs TD                              | 60  | 60  |    |         |    |         | 98 | 49/50   |    | 0.93      |
| Nami et al, 2015                | F2F Derm vs TD                              | 391 | 391 |    |         |    |         | 91 | 356/391 |    | 0.91      |
| Okita et al, 2016               | F2F Derm vs TD                              | 100 | 100 |    |         |    |         | 54 | 54/100  |    |           |
| Patro et al, 2015               | F2F nonspecialist vs TD                     | 206 | 206 |    |         |    |         | 56 | 115/206 |    |           |
| Piccoli, et al, 2014            | F2F nonspecialist vs TD                     | 184 | 184 |    |         |    |         |    |         |    | 0.69      |
| Ribas et al, 2010               | F2F Derm vs TD                              | 174 | 174 | 83 | 145/174 | 81 | 141/174 | 82 | 142/174 |    | 0.8       |
| Rios-Yuil, 2012                 | F2F Derm vs TD                              | 30  | 30  |    |         |    |         | 83 | 25/30   | 67 | 0.65      |
| Romero Aguilera et al, 2014 (A) | F2F Derm vs TD1                             | 457 | 192 |    |         | 69 | 118/170 | 73 | 124/170 |    |           |
| Romero Aguilera et al, 2014 (B) | F2F Derm vs TD2                             | 457 | 192 |    |         | 73 | 124/170 | 72 | 123/170 |    |           |
| Romero Aguilera et al, 2014 (C) | F2F Derm vs TD3                             | 457 | 192 |    |         | 67 | 114/170 | 88 | 150/170 |    |           |
| Romero et al, 2010 (A)          | F2F Derm vs TD (SFTD)                       | 457 | 192 |    |         |    |         | 88 | 325/368 |    |           |
| Romero et al, 2010 (B)          | F2F Derm vs TD (SFTD and videoconferencing) | 457 | 176 |    |         |    |         | 85 | 314/368 |    |           |
| Rubegni et al, 2011             | F2F Derm vs TD                              | 130 | 130 |    |         |    |         | 88 | 114/130 |    | 0.86      |
| Saleh et al, 2017               | F2F Derm vs TD                              | 600 | 600 |    |         | 88 | 526/600 | 81 | 488/600 |    | 0.46-0.52 |
| Senel, et al, 2013              | F2F Derm vs TD1 (no dermoscopy)             | 150 | 150 |    |         |    |         |    |         |    | 0.77      |
| Senel, et al, 2013              | F2F Derm vs TD2 (no dermoscopy)             | 150 | 150 |    |         |    |         |    |         |    | 0.75      |



1  
2  
3  
4  
5  
6  
7  
8  
9  
10  
11  
12  
13  
14  
15  
16  
17  
18  
19  
20  
21  
22  
23  
24  
25  
26  
27  
28  
29  
30  
31  
32  
33  
34  
35  
36  
37  
38  
39  
40  
41  
42  
43  
44  
45  
46  
47

|                               |                                                            |      |      |    |          |    |          |    |           |            |
|-------------------------------|------------------------------------------------------------|------|------|----|----------|----|----------|----|-----------|------------|
| Senel, et al, 2013            | F2F Derm vs TD1 (dermoscopy)                               | 150  | 150  |    |          |    |          |    |           | 0.85       |
| Senel, et al, 2013            | F2F Derm vs TD2 (dermoscopy)                               | 150  | 150  |    |          |    |          |    |           | 0.86       |
| Sola-Ortigosa et al, 2020 (A) | F2F Derm vs TD1 (no dermoscopy)                            | 636  | 1000 | 82 | 821/1000 | 88 | 875/1000 |    |           | 0.87       |
| Sola-Ortigosa et al, 2020 (B) | F2F Derm vs TD2 (no dermoscopy)                            | 636  | 1000 | 83 | 832/1000 | 84 | 835/1000 |    |           | 0.83       |
| Sola-Ortigosa et al, 2020 (C) | F2F Derm vs TD3 (no dermoscopy)                            | 636  | 1000 | 81 | 813/1000 | 88 | 884/1000 |    |           | 0.89       |
| Sola-Ortigosa et al, 2020 (D) | F2F Derm vs TD1 (dermoscopy)                               | 636  | 1000 | 92 | 915/1000 | 92 | 915/1000 |    |           | 0.91       |
| Sola-Ortigosa et al, 2020 (E) | F2F Derm vs TD2 (dermoscopy)                               | 636  | 1000 | 90 | 902/1000 | 91 | 912/1000 |    |           | 0.9        |
| Sola-Ortigosa et al, 2020 (F) | F2F Derm vs TD3 (dermoscopy)                               | 636  | 1000 | 90 | 899/1000 | 90 | 903/1000 |    |           | 0.89       |
| Tan et al, 2010 (A)           | F2F Derm vs TD1, F2F Derm 1 vs F2F Derm 2                  | 200  | 491  | 82 | 157/191  | 72 | 355/491  | 74 | 283/385   |            |
| Tan et al, 2010 (B)           | F2F Derm vs TD2, F2F Derm 2 vs F2F Derm 3                  | 200  | 491  | 76 | 80/106   |    |          | 74 | 162/219   |            |
| Tan et al, 2010 (C)           | F2F Derm 1 vs F2F Derm 3                                   | 200  | 491  | 76 | 147/194  |    |          |    |           |            |
| Tran et al, 2011              | F2F Derm vs TD                                             | 30   | 30   |    |          |    |          | 75 | 23/30     |            |
| Vano-Galvan et al, 2011       | F2F Derm vs TD                                             | 100  | 100  |    |          |    |          | 69 | 1381/2000 |            |
| Vestergaard et al, 2020 (A)   | A F2F Derm vs TD1                                          | 519  | 600  | 62 | 370/600  | 62 | 372/600  | 58 | 170/292   |            |
| Vestergaard et al, 2020 (B)   | F2F Derm vs TD2                                            | 519  | 600  |    |          |    |          | 60 | 361/600   | 54 157/292 |
| Warshaw et al, 2015 (A)       | F2F Derm vs TD (non biopsied pigmented lesions, Macro)     | 2152 | 3021 |    |          |    |          | 76 | 570/753   | 0.56       |
| Warshaw et al, 2015 (B)       | F2F Derm vs TD (non biopsied pigmented lesions, Macro+PLD) | 2152 | 3021 |    |          |    |          | 75 | 566/752   | 0.56       |
| Warshaw et al, 2015 (C)       | F2F Derm vs TD (non biopsied pigmented lesions, Macro+PLD) | 2152 | 3021 |    |          |    |          | 80 | 548/684   | 0.62       |

|                            |                                                              |      |      |    |          |    |         |
|----------------------------|--------------------------------------------------------------|------|------|----|----------|----|---------|
| Warshaw et al, 2015 (D)    | F2F Derm vs TD (biopsied pigmented lesions, Macro)           | 2152 | 3021 | 53 | 344/651  |    | 0.44    |
| Warshaw et al, 2015 (E)    | F2F Derm vs TD (biopsied pigmented lesions, Macro+PLD)       | 2152 | 3021 | 53 | 348/652  |    | 0.45    |
| Warshaw et al, 2015 (F)    | F2F Derm vs TD (biopsied pigmented lesions, Macro+PLD)       | 2152 | 3021 | 60 | 357/595  |    | 0.52    |
| Warshaw et al, 2015 (G)    | F2F Derm vs TD (NONbiopsied NONpigmented lesions, Macro)     | 2152 | 3021 | 52 | 300/583  |    | 0.38    |
| Warshaw et al, 2015 (H)    | F2F Derm vs TD (NONbiopsied NONpigmented lesions, Macro+PLD) | 2152 | 3021 | 50 | 291/579  |    | 0.38    |
| Warshaw et al, 2015 (I)    | F2F Derm vs TD (biopsied NONpigmented lesions, Macro)        | 2152 | 3021 | 46 | 473/1034 |    | 0.32    |
| Warshaw et al, 2015 (J)    | F2F Derm vs TD (biopsied NONpigmented lesions, Macro+PLD)    | 2152 | 3021 | 50 | 511/1020 |    | 0.37    |
| Zanini, 2013               | F2F Derm vs TD                                               | 100  | 100  | 76 | 76/100   |    |         |
| Zink et al, 2017, July (A) | F2F Derm vs TD                                               | 195  | 195  | 59 | 115/195  | 56 | 108/195 |
| Zink et al, 2017, Sept (B) | F2F Derm vs TD                                               | 26   | 26   | 92 | 24/26    | 67 | 17/26   |

**eTable 4. Included unique study groupings and letter codes for individual agreement rates and kappa concordance values.** The abbreviations used in the text are as follows: TD (Teledermatology or Teledermatologist), Derm (Dermatologist), F2F (Face-to-Face), SFTD (Store and Forward Technology), PLD (Polarized Light Dermoscopy), and Macro (Macroscopic clinical images).

| Study ID                  | Journal                                                                                           | Reason For Exclusion |
|---------------------------|---------------------------------------------------------------------------------------------------|----------------------|
| NCT03034694, 2016         | <a href="http://ClinicalTrials.gov">ClinicalTrials.gov</a>                                        | Wrong study design   |
| Andersson et al, 2017     | Lakartidningen                                                                                    | Wrong study design   |
| Romero et al, 2018        | Actas dermo-sifiliograficas                                                                       | Wrong study design   |
| Orruno et al, 2016        | Health Technology Assessment Database                                                             | Wrong study design   |
| Batalla et al, 2016       | Piel                                                                                              | Wrong study design   |
| Kroemer et al, 2011       | British Journal of Dermatology                                                                    | Wrong study design   |
| Ernstberger et al, 2014   | Zentralblatt fur Chirurgie                                                                        | Wrong study design   |
| Totty et al, 2018         | Journal of wound care                                                                             | Wrong study design   |
| Wurm et al, 2013          | Journal of Telemedicine and Telecare                                                              | Wrong study design   |
| Wang et al, 2017          | Telemedicine journal and e-health : the official journal of the American Telemedicine Association | Wrong study design   |
| Singh et al, 2011         | Australasian Journal of Dermatology                                                               | Wrong study design   |
| Grey et al, 2017          | Dermatitis                                                                                        | Wrong study design   |
| Crompton et al, 2010      | Journal of Visual Communication in Medicine                                                       | Wrong study design   |
| Ali et al, 2021           | JMIR formative research                                                                           | Wrong study design   |
| Boyce et al, 2011         | Dermatology                                                                                       | Wrong study design   |
| Berg et al, 2017          | Sarcoidosis Vasculitis and Diffuse Lung Diseases                                                  | Wrong study design   |
| Shin et al, 2014          | Journal of telemedicine and telecare                                                              | Wrong study design   |
| Gacto-Sanchez et al, 2020 | Burns : journal of the International Society for Burn Injuries                                    | Wrong study design   |
| Tian et al, 2017          | Journal of Cosmetic Dermatology                                                                   | Wrong study design   |
| Thind et al, 2011         | Clinical and Experimental Dermatology                                                             | Wrong study design   |
| Silveira et al, 2014      | BMC Dermatology                                                                                   | Wrong study design   |
| O'Connor et al, 2017      | JAMA Dermatology                                                                                  | Wrong study design   |
| Janda et al, 2020         | The Lancet. Digital health                                                                        | Wrong study design   |
| Day et al, 2020           | Military medicine                                                                                 | Wrong study design   |
| Karlsson et al, 2015      | Acta Dermato-Venereologica                                                                        | Wrong study design   |
| Seghers et al, 2015       | Australasian Journal of Dermatology                                                               | Wrong study design   |
| Hazenberget al, 2010      | Journal of Medical Engineering and Technology                                                     | Wrong study design   |
| Borve et al, 2015         | Acta Dermato-Venereologica                                                                        | Wrong study design   |
| Boissin et al, 2015       | Burns                                                                                             | Wrong study design   |
| Da Silva et al, 2018      | Dermatology online journal                                                                        | Wrong study design   |
| Devrim et al, 2019        | BMC pediatrics                                                                                    | Wrong study design   |
| Danielsson et al, 2016    | Health Technology Assessment Database                                                             | Wrong study design   |
| Berglund et al, 2020      | Journal of the European Academy of Dermatology and Venereology : JEADV                            | Wrong study design   |
| Forsblom et al, 2013      | Clinical Infectious Diseases                                                                      | Wrong study design   |
| G Bianchi et al, 2020     | Journal of medical Internet research                                                              | Wrong study design   |
| Congalton et al, 2015     | Journal of the European Academy of Dermatology and Venereology                                    | Wrong study design   |
| Ferrandiz et al, 2012     | Archives of Dermatology                                                                           | Wrong study design   |
| Ismail et al, 2018        | International Journal of Women's Dermatology                                                      | Wrong study design   |
| Gamus et al, 2019         | International journal of medical informatics                                                      | Wrong study design   |
| Paudel et al, 2020        | Case reports in dermatological medicine                                                           | Wrong study design   |
| Georgesesen et al, 2020   | Telemedicine journal and e-health : the official journal of the American Telemedicine Association | Wrong study design   |
| Gagnon et al, 2015        | Dermatology Times                                                                                 | Wrong study design   |
| Philp et al, 2013         | Pediatric Dermatology                                                                             | Wrong study design   |
| Mooney et al, 2011        | Skin Research and Technology                                                                      | Wrong study design   |
| Do Khac et al, 2021       | JMIR mHealth and uHealth                                                                          | Wrong study design   |
| Chambers et al, 2012      | Journal of the American Academy of Dermatology                                                    | Wrong study design   |
| Garcia-Romero et al, 2011 | Telemedicine journal and e-health : the official journal of the American Telemedicine Association | Wrong study design   |
| Ahmed et al, 2020         | Annals of internal medicine                                                                       | Wrong study design   |
| Marwaha et al, 2019       | Journal of the American Academy of Dermatology                                                    | Wrong study design   |
| NCT02122432, 2014         | <a href="http://ClinicalTrials.gov">ClinicalTrials.gov</a>                                        | Wrong study design   |
| Lowe et al, 2021          | Clinical and experimental dermatology                                                             | Wrong study design   |

1  
2  
3  
4  
5  
6  
7  
8  
9  
10  
11  
12  
13  
14  
15  
16  
17  
18  
19  
20  
21  
22  
23  
24  
25  
26  
27  
28  
29  
30  
31  
32  
33  
34  
35  
36  
37  
38  
39  
40  
41  
42  
43  
44  
45  
46  
47  
48  
49  
50  
51  
52  
53  
54  
55  
56  
57  
58  
59  
60

|                               |                                                                                                                            |                                         |
|-------------------------------|----------------------------------------------------------------------------------------------------------------------------|-----------------------------------------|
| Bowling et al, 2011           | Wound Repair and Regeneration                                                                                              | Wrong study design                      |
| Marin-Gomez et al, 2020       | Journal of primary care & community health                                                                                 | Wrong study design                      |
| Veronese et al, 2021          | Diagnostics (Basel, Switzerland)                                                                                           | Wrong study design                      |
| Ismail et al, 2018            | International journal of dermatology                                                                                       | Wrong study design                      |
| NCT02905851, 2016             | <a href="http://ClinicalTrials.gov">ClinicalTrials.gov</a>                                                                 | Wrong study design                      |
| Trinidad et al, 2020          | Journal of the American Academy of Dermatology                                                                             | Wrong study design                      |
| Tensen et al, 2019            | Studies in health technology and informatics                                                                               | Wrong study design                      |
| Karavan et al, 2014           | Journal of telemedicine and telecare                                                                                       | Wrong study design                      |
| Viola et al, 2011             | Archives of Dermatology                                                                                                    | Wrong study design                      |
| van Netten et al, 2017        | Scientific reports                                                                                                         | Wrong study design                      |
| Cai et al, 2016               | Burns : journal of the International Society for Burn Injuries                                                             | Wrong study design                      |
| Hazenberget al, 2010          | Diabetes Technology and Therapeutics                                                                                       | Wrong study design                      |
| Jacoby et al, 2021            | Journal of drugs in dermatology : JDD                                                                                      | Wrong study design                      |
| Pak et al, 2018               | Wound repair and regeneration : official publication of the Wound Healing Society [and] the European Tissue Repair Society | Wrong study design                      |
| Kummerow Broman et al, 2019   | JAMA surgery                                                                                                               | Wrong study design                      |
| Munoz-Lopez et al, 2021       | Journal of the European Academy of Dermatology and Venereology : JEADV                                                     | Wrong study design                      |
| Markun et al, 2017            | Medicine                                                                                                                   | Wrong study design                      |
| Piette et al, 2017            | Journal of telemedicine and telecare                                                                                       | Wrong study design                      |
| Tan et al, 2010               | British Journal of Dermatology                                                                                             | Wrong study design                      |
| Watson et al, 2010            | Archives of Dermatology                                                                                                    | Wrong study design                      |
| Wiseman et al, 2016           | Journal of vascular surgery. Venous and lymphatic disorders                                                                | Wrong study design                      |
| Wolf et al, 2013              | JAMA dermatology                                                                                                           | Wrong study design                      |
| Laggis et al, 2020            | The American Journal of dermatopathology                                                                                   | Wrong study design                      |
| Kazi et al, 2021              | Telemedicine journal and e-health : the official journal of the American Telemedicine Association                          | Wrong study design                      |
| Kanthraj et al, 2013          | Indian Journal of Dermatology, Venereology and Leprology                                                                   | Wrong study design                      |
| Shah et al, 2016              | Journal of the American Academy of Dermatology                                                                             | Wrong study design                      |
| Kim et al, 2018               | Skin research and technology                                                                                               | Wrong study design                      |
| Nguyen et al, 2017            | Journal of Clinical and Aesthetic Dermatology                                                                              | Wrong study design                      |
| Rizvi et al, 2020             | PloS one                                                                                                                   | Wrong study design                      |
| Mehrtens et al, 2019          | Clinical and experimental dermatology                                                                                      | Wrong study design                      |
| Knudsen et al, 2012           | Lakartidningen                                                                                                             | Research letter or letter to the editor |
| Korman et al, 2020            | Journal of the American Academy of Dermatology                                                                             | Research letter or letter to the editor |
| Mercer et al, 2014            | Journal of Cutaneous Medicine and Surgery                                                                                  | Research letter or letter to the editor |
| Grunig et al, 2015            | JAMA Dermatology                                                                                                           | Research letter or letter to the editor |
| Cartron et al, 2020           | Dermatologic therapy                                                                                                       | Research letter or letter to the editor |
| McAfee et al, 2020            | Journal of the American Academy of Dermatology                                                                             | Research letter or letter to the editor |
| Wong et al, 2021              | JAMA dermatology                                                                                                           | Research letter or letter to the editor |
| Baranowski et al, 2020        | Journal of the American Academy of Dermatology                                                                             | Research letter or letter to the editor |
| Micheletti et al, 2014        | Journal of the American Academy of Dermatology                                                                             | Research letter or letter to the editor |
| Osei-Tutu et al, 2013         | Journal of the American Academy of Dermatology                                                                             | Research letter or letter to the editor |
| Nair et al, 2015              | International Journal of Dermatology                                                                                       | Research letter or letter to the editor |
| Miller et al, 2021            | Journal of the American Academy of Dermatology                                                                             | Research letter or letter to the editor |
| Keleshian et al, 2017         | Journal of the American Academy of Dermatology                                                                             | Research letter or letter to the editor |
| HAYES; Inc et al, 2016        | Health Technology Assessment Database                                                                                      | Research letter or letter to the editor |
| Jacob et al, 2017             | Journal of telemedicine and telecare                                                                                       | Research letter or letter to the editor |
| Perkins et al, 2020           | Journal of the American Academy of Dermatology                                                                             | Research letter or letter to the editor |
| Halpern et al, 2010           | British Journal of Dermatology                                                                                             | Research letter or letter to the editor |
| Newman et al, 2020            | Journal of the American Academy of Dermatology                                                                             | Research letter or letter to the editor |
| Hunt et al, 2020              | Clinical and experimental dermatology                                                                                      | Research letter or letter to the editor |
| 2018                          | Nursing                                                                                                                    | Research letter or letter to the editor |
| Taneja et al, 2021            | Indian journal of dermatology, venereology and leprology                                                                   | Research letter or letter to the editor |
| Echeverria-Garcia et al, 2019 | Actas dermo-sifiliograficas                                                                                                | Research letter or letter to the editor |
| Henning et al, 2010           | Archives of Dermatology                                                                                                    | Research letter or letter to the editor |

|    |                             |                                                                        |                                         |
|----|-----------------------------|------------------------------------------------------------------------|-----------------------------------------|
| 1  |                             |                                                                        |                                         |
| 2  |                             |                                                                        |                                         |
| 3  | Demo et al, 2019            | Clinical and experimental dermatology                                  | Research letter or letter to the editor |
| 4  | Byamba et al, 2015          | British Journal of Dermatology                                         | Research letter or letter to the editor |
| 5  | Gupta et al, 2020           | Journal of the American Academy of Dermatology                         | Research letter or letter to the editor |
| 6  | De Giorgi et al, 2017       | Journal of the European Academy of Dermatology and Venereology         | Research letter or letter to the editor |
| 7  |                             |                                                                        |                                         |
| 8  | Duong et al, 2016           | Annales de Dermatologie et de Venereologie                             | Research letter or letter to the editor |
| 9  | Mortimer et al, 2021        | Journal of the American Academy of Dermatology                         | Research letter or letter to the editor |
| 10 | Gravelly et al, 2010        | Journal of the American Academy of Dermatology                         | Research letter or letter to the editor |
| 11 | Choi et al, 2021            | International journal of dermatology                                   | Research letter or letter to the editor |
| 12 | Motley et al, 2012          | BMJ: British Medical Journal (Clinical Research Edition)               | Research letter or letter to the editor |
| 13 | Leavitt et al, 2016         | Journal of the American Academy of Dermatology                         | Research letter or letter to the editor |
| 14 | Cheng et al, 2020           | Dermatitis : contact, atopic, occupational, drug                       | Research letter or letter to the editor |
| 15 | Clark et al, 2021           | Journal of the American Academy of Dermatology                         | Research letter or letter to the editor |
| 16 | Fuesl et al, 2010           | MMW-Fortschritte der Medizin                                           | Research letter or letter to the editor |
| 17 | English III et al, 2013     | Journal of the American Academy of Dermatology                         | Research letter or letter to the editor |
| 18 | Cotes et al, 2021           | Journal of the American Academy of Dermatology                         | Research letter or letter to the editor |
| 19 | Abi Rafeh et al, 2021       | Journal of cutaneous medicine and surgery                              | Research letter or letter to the editor |
| 20 | Okeke et al, 2020           | The Journal of dermatological treatment                                | Research letter or letter to the editor |
| 21 | Splete et al, 2014          | Emergency Medicine (00136654)                                          | Research letter or letter to the editor |
| 22 | Khosravi et al, 2021        | Clinical and experimental dermatology                                  | Research letter or letter to the editor |
| 23 | Sivesind et al, 2021        | Journal of the American Academy of Dermatology                         | Research letter or letter to the editor |
| 24 | Stoecker et al, 2013        | JAMA dermatology                                                       | Research letter or letter to the editor |
| 25 | Skayem et al, 2020          | Journal of the European Academy of Dermatology and Venereology : JEADV | Research letter or letter to the editor |
| 26 | Su et al, 2020              | Journal of the American Academy of Dermatology                         | Research letter or letter to the editor |
| 27 | Massone et al, 2021         | Anais brasileiros de dermatologia                                      | Research letter or letter to the editor |
| 28 | Li et al, 2021              | The Journal of infection                                               | Research letter or letter to the editor |
| 29 | Afanasiev et al, 2021       | Journal of the American Academy of Dermatology                         | Research letter or letter to the editor |
| 30 | Varma et al, 2011           | British Journal of Dermatology                                         | Research letter or letter to the editor |
| 31 | Van Der Heijden et al, 2010 | Journal of the European Academy of Dermatology and Venereology         | Research letter or letter to the editor |
| 32 | Motley et al, 2012          | BMJ (Online)                                                           | Research letter or letter to the editor |
| 33 | Villani et al, 2020         | Dermatologic therapy                                                   | Research letter or letter to the editor |
| 34 | Portnoy et al, 2018         | The journal of allergy and clinical immunology. In practice            | Research letter or letter to the editor |
| 35 |                             |                                                                        |                                         |
| 36 | Tschandl et al, 2018        | British Journal of Dermatology                                         | Research letter or letter to the editor |
| 37 | Poolworarluk et al, 2020    | Future healthcare journal                                              | Research letter or letter to the editor |
| 38 | Anonymous et al, 2020       | Journal of drugs in dermatology : JDD                                  | Research letter or letter to the editor |
| 39 |                             |                                                                        |                                         |
| 40 | Tan et al, 2021             | Annals of the Academy of Medicine, Singapore                           | Research letter or letter to the editor |
| 41 | Silva et al, 2021           | Anais brasileiros de dermatologia                                      | Research letter or letter to the editor |
| 42 | de Giorgi et al, 2016       | International Journal of Dermatology                                   | Wrong outcomes                          |
| 43 | Senel et al, 2014           | Journal of telemedicine and telecare                                   | Wrong outcomes                          |
| 44 | Goodier et al, 2021         | Contact dermatitis                                                     | Wrong outcomes                          |
| 45 | Foolad et al, 2017          | International Journal of Dermatology                                   | Wrong outcomes                          |
| 46 | Wells et al, 2020           | The Journal of clinical and aesthetic dermatology                      | Wrong outcomes                          |
| 47 | Arzberger et al, 2016       | Acta Dermato-Venereologica                                             | Wrong outcomes                          |
| 48 | Creighton-Smith et al, 2017 | International Journal of Dermatology                                   | Wrong outcomes                          |
| 49 |                             |                                                                        |                                         |
| 50 | Marwaha et al, 2019         | Journal of the American Academy of Dermatology                         | Wrong outcomes                          |
| 51 | Pasquali et al, 2021        | Actas dermo-sifiliograficas                                            | Wrong outcomes                          |
| 52 | Vestergaard et al, 2020     | Family practice                                                        | Wrong outcomes                          |
| 53 | Kravets et al, 2018         | Acta dermatovenerologica Alpina, Pannonica, et Adriatica               | Wrong outcomes                          |
| 54 | Speiser et al, 2014         | American Journal of Dermatopathology                                   | Wrong outcomes                          |
| 55 | N/A                         | Journal of the American Academy of Dermatology                         | Wrong outcomes                          |
| 56 | Whited et al, 2013          | Journal of Telemedicine and Telecare                                   | Wrong outcomes                          |

1  
2  
3  
4  
5  
6  
7  
8  
9  
10  
11  
12  
13  
14  
15  
16  
17  
18  
19  
20  
21  
22  
23  
24  
25  
26  
27  
28  
29  
30  
31  
32  
33  
34  
35  
36  
37  
38  
39  
40  
41  
42  
43  
44  
45  
46  
47  
48  
49  
50  
51  
52  
53  
54  
55  
56  
57  
58  
59  
60

|                                   |                                                                                                           |                                           |
|-----------------------------------|-----------------------------------------------------------------------------------------------------------|-------------------------------------------|
| Abhishek et al, 2021              | medRxiv                                                                                                   | Wrong outcomes                            |
| Villa et al, 2020                 | Internal and emergency medicine                                                                           | Wrong outcomes                            |
| Lubeek et al, 2016                | Tijdschrift voor gerontologie en geriatrie                                                                | review                                    |
| Ndegwa et al, 2016                | Health Technology Assessment Database                                                                     | review                                    |
| Moreno-Ramirez et al, 2017        | Acta dermato-venereologica                                                                                | review                                    |
| Moreno-Ramirez et al, 2017        | Acta Dermato-Venereologica                                                                                | review                                    |
| Van Der Heijden et al, 2010       | Huisarts en Wetenschap                                                                                    | review                                    |
| Walocko et al, 2017               | Dermatologic Clinics                                                                                      | review                                    |
| Roman et al, 2014                 | Journal of the Dermatology Nurses' Association                                                            | review                                    |
| Hart et al, 2011                  | Telemedicine journal and e-health : the official journal of the American Telemedicine Association         | review                                    |
| Elsner et al, 2020                | Journal der Deutschen Dermatologischen Gesellschaft = Journal of the German Society of Dermatology : JDDG | review                                    |
| Kaliyadan et al, 2020             | Indian journal of dermatology                                                                             | review                                    |
| Burch et al,                      |                                                                                                           | review                                    |
| Evans et al, 2017                 | Pharmazeutische Zeitung                                                                                   | Editorial                                 |
| Anonymous. et al, 2016            | Journal of AHIMA / American Health Information Management Association                                     | Editorial                                 |
| Luk et al, 2018                   | Hong Kong Journal of Dermatology and Venereology                                                          | Editorial                                 |
| Queen et al, 2018                 | International wound journal                                                                               | Editorial                                 |
| Anguita et al, 2014               | Nurse Prescribing                                                                                         | Editorial                                 |
| Haworth et al, 2020               | Clinical and experimental dermatology                                                                     | Editorial                                 |
| Romero-Aguilera et al, 2019       | Actas dermo-sifiliograficas                                                                               | Editorial                                 |
| Barrio Garde et al, 2016          | Piel                                                                                                      | Editorial                                 |
| Morand et al, 2010                | Annales de dermatologie et de venereologie                                                                | Editorial                                 |
| N/A                               | Journal of the American Academy of Dermatology                                                            | Abstract                                  |
| N/A                               | Journal of the American Academy of Dermatology                                                            | Abstract                                  |
| Bianchi et al, 2020               | Journal of the American Academy of Dermatology                                                            | Abstract                                  |
| Creadore et al, 2020              | Journal of the American Academy of Dermatology                                                            | Abstract                                  |
| N/A                               | Journal of the American Academy of Dermatology                                                            | Abstract                                  |
| Tognetti L et al, 2020            |                                                                                                           | Abstract                                  |
| SPLATE et al, 2014                | Emergency Medicine (00136654)                                                                             | Abstract                                  |
| N/A                               | Journal of the American Academy of Dermatology                                                            | Abstract                                  |
| Dahlen Gyllencreutz et al, 2017   | Journal of the European Academy of Dermatology and Venereology                                            | Wrong intervention                        |
| Tandjung et al, 2015              | Journal of Evaluation in Clinical Practice                                                                | Wrong intervention                        |
| Paradela-De-La-Morena et al, 2015 | European Journal of Dermatology                                                                           | Wrong intervention                        |
| Horsham et al, 2015               | British Journal of Dermatology                                                                            | Wrong intervention                        |
| Saenz et al, 2018                 | International Journal of Telemedicine and Applications                                                    | Wrong intervention                        |
| Kochmann et al, 2016              | Telemedicine journal and e-health : the official journal of the American Telemedicine Association         | Wrong comparator                          |
| Markun et al, 2017                | Medicine (United States)                                                                                  | Wrong comparator                          |
| Feigenbaum et al, 2017            | Pediatric Dermatology                                                                                     | Wrong comparator                          |
| Massone et al, 2014               | Journal of the European Academy of Dermatology and Venereology                                            | Wrong comparator                          |
| MacLellan et al, 2021             | Journal of the American Academy of Dermatology                                                            | Wrong comparator                          |
| Koysombat et al, 2021             | Journal of plastic, reconstructive & aesthetic surgery : JPRAS                                            | Correspondence                            |
| Jakhar et al, 2020                | Clinical and experimental dermatology                                                                     | Correspondence                            |
| Alkmim et al, 2013                | Journal of Telemedicine and Telecare                                                                      | Correspondence                            |
| NCT02836665, 2016                 | <a href="http://ClinicalTrials.gov">ClinicalTrials.gov</a>                                                | Clinical trial - no associated manuscript |
| JPRN-UMIN000020873 et al, 2016    |                                                                                                           | Clinical trial - no associated manuscript |
| Fogel et al, 2016                 | Journal of the American Academy of Dermatology                                                            | Commentary                                |
| Hoyer et al, 2020                 | Cutis                                                                                                     | Commentary                                |
| Pasadyn et al, 2020               | Journal of the American Academy of Dermatology                                                            | Duplicate                                 |

|                            |                                                                                                   |                          |
|----------------------------|---------------------------------------------------------------------------------------------------|--------------------------|
| Moreno-Ramirez et al, 2017 | American Journal of Clinical Dermatology                                                          | Erratum                  |
| Trovato et al, 2011        | Eplasty                                                                                           | Wrong patient population |
| Bowns et al, 2016          | Health Technology Assessment Database                                                             | Wrong publication date   |
| Gemelas et al, 2019        | Telemedicine journal and e-health : the official journal of the American Telemedicine Association | Wrong setting            |

**eTable 5. List of studies excluded at the full-text screening stage.**

For peer review only



A

| Domain 1: SAMPLE SELECTION                                   |                                                                                                                                                                                                                                                                                                                                                                                                                                                                                                                                                                                                                                                                                                                                                                                                                                                |                        |
|--------------------------------------------------------------|------------------------------------------------------------------------------------------------------------------------------------------------------------------------------------------------------------------------------------------------------------------------------------------------------------------------------------------------------------------------------------------------------------------------------------------------------------------------------------------------------------------------------------------------------------------------------------------------------------------------------------------------------------------------------------------------------------------------------------------------------------------------------------------------------------------------------------------------|------------------------|
| Signalling Q1                                                | <p>Was a consecutive or random sample of patients enrolled?</p> <ul style="list-style-type: none"> <li>- In the study by Giavina-Bianchi et al., a consecutive sample of patients was enrolled, introducing less bias.</li> </ul> <p>Skewed patient demographics: e.g., over 70% female, select age groups, studies.</p> <p>that do not disclose age range and or sex/gender of the patients.</p> <ul style="list-style-type: none"> <li>- In the study by Carter et al., over 70% of the patients were female, which may introduce bias and reduce applicability.</li> </ul>                                                                                                                                                                                                                                                                  | Yes/No/Unclear         |
| Signalling Q2                                                | <p>Was a case-control design avoided?</p> <ul style="list-style-type: none"> <li>- Gabel et al. avoided a case-control design, which reduces the risk of bias.</li> </ul>                                                                                                                                                                                                                                                                                                                                                                                                                                                                                                                                                                                                                                                                      | Yes/No/Unclear         |
| Signalling Q3                                                | <p>Did the study avoid inappropriate exclusions?</p> <ul style="list-style-type: none"> <li>- In the study by Giavina-Bianchi et al., complex, and severe cases were excluded, which may introduce bias and affect applicability.</li> </ul>                                                                                                                                                                                                                                                                                                                                                                                                                                                                                                                                                                                                   | Yes/No/Unclear         |
| Risk of bias                                                 | <p><b>Could the selection of patients have introduced bias?</b></p> <ul style="list-style-type: none"> <li>- For example, Giavina-Bianchi removed the most complex/severe cases and then excluded any non-skin neoplasms, and then they further filtered to only include the 10 most common skin neoplasms.</li> </ul>                                                                                                                                                                                                                                                                                                                                                                                                                                                                                                                         | RISK: LOW/HIGH/UNCLEAR |
| Concerns regarding applicability                             | <p><b>Is there concern that the included patients do not match the review question?</b></p> <ul style="list-style-type: none"> <li>- 'High' if the study only looked at a specific lesion category such as skin cancers only, or pigmented lesions only, or if they had a skewed patient demographics (e.g., 70% female, or geriatric population only). Our study is focuses on generalizability of teledermatology in all skin conditions.</li> </ul>                                                                                                                                                                                                                                                                                                                                                                                         | RISK: LOW/HIGH/UNCLEAR |
| Domain 2: INDEX TEST (Teledermatology consult)               |                                                                                                                                                                                                                                                                                                                                                                                                                                                                                                                                                                                                                                                                                                                                                                                                                                                |                        |
| Signalling Q1                                                | <p>Were the derms/physicians making the index diagnoses unaware of the reference diagnosis?</p> <ul style="list-style-type: none"> <li>- Same dermatologist doing F2F and teledermatology consults? Is there blinding of dermatologists to each other's diagnoses? In the study by Tan et al., the same dermatologist performed both the F2F and teledermatology consultations, which may introduce bias if they were not blinded to each other's diagnoses.</li> </ul>                                                                                                                                                                                                                                                                                                                                                                        | Yes/No/Unclear         |
| Signalling Q2                                                | <p>Did the study require physicians to provide a specific primary diagnosis, or were they only required to provide a general grouping, e.g., inflammatory vs. skin neoplasm. Was analysis only performed for categories instead of complete primary diagnoses (such as skin neoplasm vs basal cell carcinoma)? Did physicians use standardized referral/consult sheet with set diagnoses? Did they group similar / synonymous diagnoses (e.g dermatitis / eczema together)? Was a non-specialist in charge of comparing diagnoses and deciding if there was agreement?</p> <ul style="list-style-type: none"> <li>- In the study by Warshaw et al., physicians were required to provide a categorical or pooled diagnosis (e.g., skin neoplasm instead of basal cell carcinoma), which may introduce bias and reduce applicability.</li> </ul> | Yes/No/Unclear         |
| Risk of bias                                                 | <p><b>Could the conduct (technology used for taking images/viewing images) or interpretation (what constituted primary diagnosis/ complete agreement) of the index test have introduced bias?</b></p>                                                                                                                                                                                                                                                                                                                                                                                                                                                                                                                                                                                                                                          | RISK: LOW/HIGH/UNCLEAR |
| Concerns regarding applicability                             | <p>Is there concern that the index test, its conduct, or interpretation differ from the review question?</p>                                                                                                                                                                                                                                                                                                                                                                                                                                                                                                                                                                                                                                                                                                                                   | RISK: LOW/HIGH/UNCLEAR |
| Domain 3: REFERENCE TEST (F2F, in some cases histopathology) |                                                                                                                                                                                                                                                                                                                                                                                                                                                                                                                                                                                                                                                                                                                                                                                                                                                |                        |
| Signalling Q1                                                | <p>Describe the reference standard and how it was conducted and interpreted:</p>                                                                                                                                                                                                                                                                                                                                                                                                                                                                                                                                                                                                                                                                                                                                                               | Yes/No/Unclear         |

|                                         |                                                                                                                                                                                                                                                                                                                                                                                                               |                        |
|-----------------------------------------|---------------------------------------------------------------------------------------------------------------------------------------------------------------------------------------------------------------------------------------------------------------------------------------------------------------------------------------------------------------------------------------------------------------|------------------------|
|                                         | What was the order of visits?<br>What was the experience level and specialization of the F2F physician?<br>Did the same dermatologist do both teledermatology and F2F consult?                                                                                                                                                                                                                                |                        |
| Signalling Q2                           | Is the reference standard likely to correctly classify the target condition?                                                                                                                                                                                                                                                                                                                                  | Yes/No/Unclear         |
| <b>Risk of bias</b>                     | <b>Could the reference standard, its conduct, or its interpretation have introduced bias?</b><br>- In studies where the reference standard was a consultation with a non-specialist, such as Costello et al., there is a risk of introducing bias.                                                                                                                                                            | RISK: LOW/HIGH/UNCLEAR |
| <b>Concerns regarding applicability</b> | <b>Could the reference standard, its conduct, or its interpretation have introduced bias?</b><br>- Applicability was impacted by physician specialization.                                                                                                                                                                                                                                                    | RISK: LOW/HIGH/UNCLEAR |
| <b>Domain 4: FLOW AND TIMING</b>        |                                                                                                                                                                                                                                                                                                                                                                                                               |                        |
| Signalling Q1                           | Was there an appropriate interval between index test(s) and reference standard?<br>- Was the time interval greater than 2 weeks? In studies where the same dermatologist did F2F and teledermatology -> Say 'No' regardless of the time between teledermatology and F2F consult.<br>- In the study by Gerhardt et al., there was a 30-day interval between teledermatology and F2F, which may introduce bias. | Yes/No/Unclear         |
| Signalling Q2                           | Did all patients receive a reference standard?                                                                                                                                                                                                                                                                                                                                                                |                        |
| Signalling Q3                           | Did all patients receive the same reference standard?<br>- In studies like Sola-Ortigosa et al., all patients received a reference standard, either histopathology or F2F consultation.<br>Did a paper use histopathology as the reference standard for cancer lesions but F2F for non-cancer lesions? Were all patients evaluated by physicians with similar level of experience?                            | Yes/No/Unclear         |
| Signalling Q4                           | Were all patients included in the analysis?<br>- In studies like Gabel et al., all patients were included in the analysis, reducing the risk of bias.                                                                                                                                                                                                                                                         | Yes/No/Unclear         |
| <b>Risk of bias</b>                     | Could the patient flow have introduced bias?                                                                                                                                                                                                                                                                                                                                                                  | RISK: LOW/HIGH/UNCLEAR |

B

| Study                            | Risk of bias domains |    |    |    |         |
|----------------------------------|----------------------|----|----|----|---------|
|                                  | D1                   | D2 | D3 | D4 | Overall |
| Altieri, et al, 2017             | +                    | +  | +  | +  | +       |
| Azfar, et al, 2014               | +                    | +  | +  | +  | X       |
| Barbieri, et al, 2014            | +                    | +  | -  | +  | -       |
| Barcaui, et al, 2018             | +                    | +  | X  | X  | X       |
| Batalla, et al, 2015             | -                    | +  | +  | +  | -       |
| Borve, et al, 2012               | +                    | +  | X  | X  | X       |
| Borve, et al, 2013               | X                    | -  | +  | +  | X       |
| Carter, et al, 2017              | X                    | -  | +  | X  | X       |
| Chen, et al, 2010                | +                    | X  | X  | -  | X       |
| Clarke, et al, 2021              | X                    | X  | +  | +  | X       |
| Costello, et al, 2019            | X                    | +  | X  | X  | X       |
| Duong, et al, 2014               | +                    | -  | X  | X  | X       |
| Gabel, et al, 2021               | X                    | +  | +  | X  | X       |
| Gatica, 2015                     | +                    | +  | -  | +  | -       |
| Gerhardt, et al, 2021            | X                    | -  | X  | X  | X       |
| Giavina-Bianchi, et al, Oct 2020 | X                    | +  | -  | X  | X       |
| Giavina-Bianchi, et al, Nov 2020 | X                    | +  | -  | X  | X       |
| Gonzalez-Coloma, et al, 2019     | +                    | X  | X  | +  | X       |
| Goulart-Silveira, et al, 2019    | X                    | +  | +  | X  | X       |
| Jones, et al, 2021               | +                    | -  | +  | +  | -       |
| Keller, et al, 2020              | +                    | +  | +  | +  | +       |
| Lamel, et al, 2012               | -                    | -  | +  | +  | -       |
| Marchell, et al, 2017            | +                    | +  | +  | +  | +       |
| Muir, et al, 2011                | X                    | +  | +  | X  | X       |
| Nami, et al, 2015                | X                    | +  | +  | +  | X       |
| Okita, et al, 2016               | +                    | +  | +  | +  | X       |
| Patro, et al, 2015               | +                    | +  | X  | +  | X       |
| Piccoli, et al, 2015             | X                    | +  | X  | X  | X       |
| Ribas, et al, 2010               | X                    | +  | X  | X  | X       |
| Rubegni, et al, 2011             | +                    | +  | +  | +  | +       |
| Saleh, et al, 2017               | +                    | +  | +  | +  | +       |
| Senel, et al, 2013               | X                    | +  | +  | X  | X       |
| Sola-Ortigosa, et al, 2020       | +                    | +  | X  | X  | X       |
| Tan, et al, 2010                 | X                    | X  | +  | X  | X       |
| Tran, et al, 2011                | +                    | +  | X  | +  | X       |
| Vano-Galvan, et al, 2010         | +                    | +  | +  | +  | X       |
| Vestergaard, et al, 2020         | +                    | +  | +  | X  | X       |
| Warsaw, et al, 2015              | +                    | -  | +  | +  | -       |
| Zanini, 2013                     | -                    | +  | +  | -  | -       |
| Zink, et al, 2017, July          | +                    | -  | X  | X  | X       |
| Zink, et al, 2017, Sept          | +                    | +  | +  | +  | +       |

Domains:  
 D1: Patient selection.  
 D2: Index test.  
 D3: Reference standard.  
 D4: Flow & timing.

Judgement  
 X High  
 - Some concerns  
 + Low

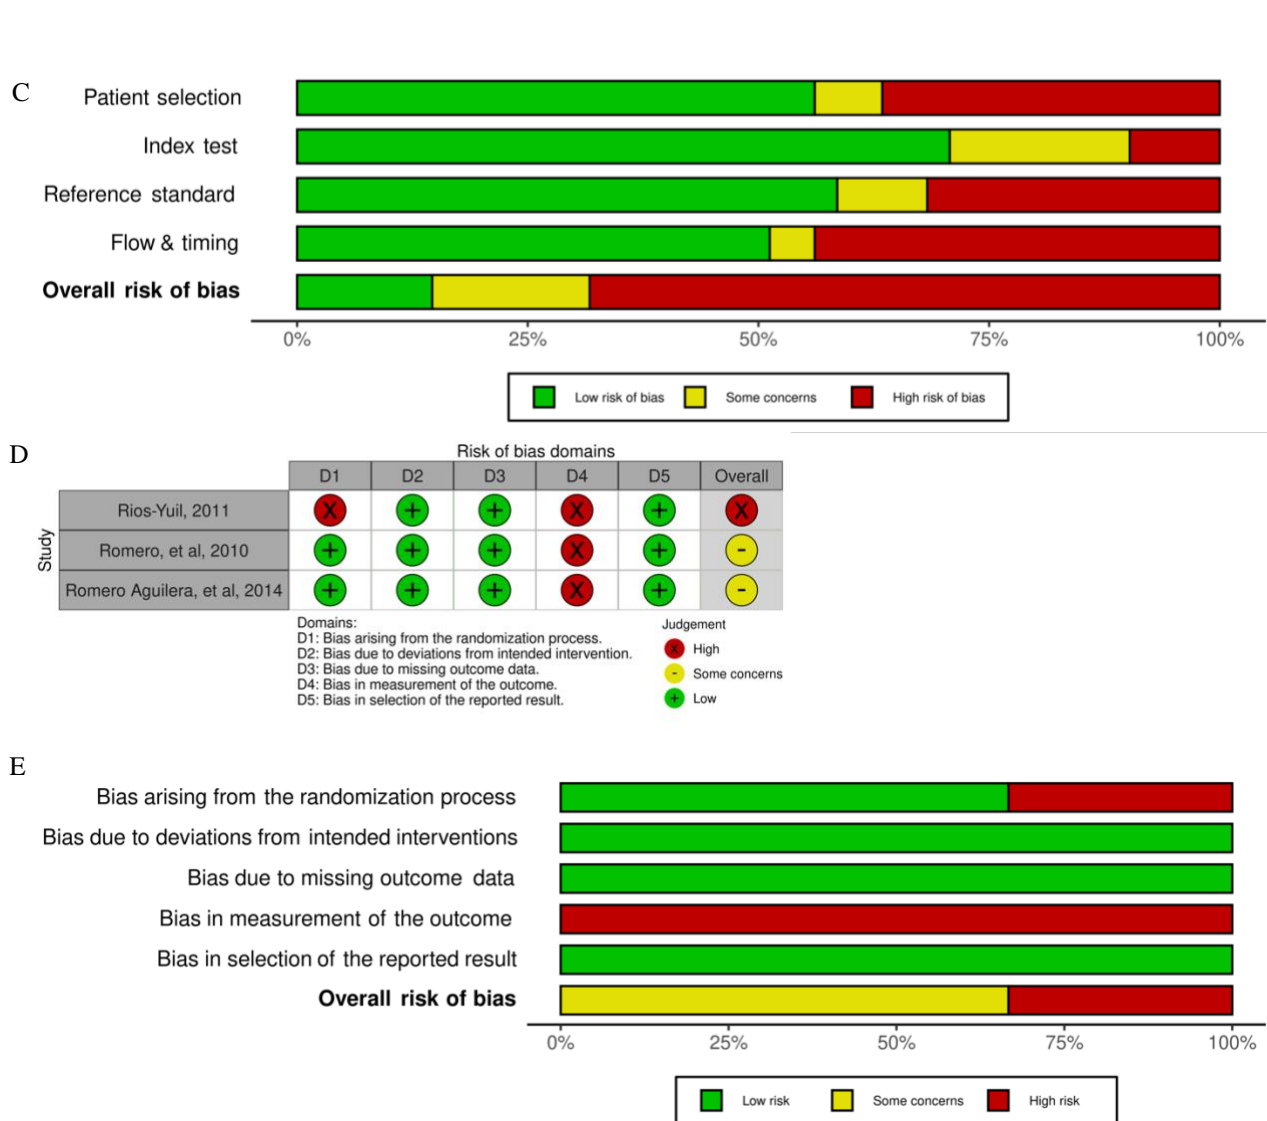

**eTable 6. Risk of Bias (ROB) results.**

(A) QUADAS-2 summary sheet. (B,C) QUADAS-2 RoB analysis of 41 observational studies. (D,E) ROB-2 analysis of three randomized controlled trials.

**eReferences.**

1. Hoyer P, Ahatov R, Ross L. Utilization of telehealth services during the COVID-19 pandemic. *Cutis* 2020;106(2):70-71. doi: <https://dx.doi.org/10.12788/cutis.0034>
2. Gomez Arias PJ, Arias Blanco MC, Redondo Sanchez J, et al. [Usefulness and efficiency of teledermoscopy in skin cancer management in primary care]. *Semergen* 2020;46(8):553-59. doi: <https://dx.doi.org/10.1016/j.semern.2020.06.026>
3. Jacoby T, Woolard A, Chamoun S, et al. Asynchronous Teledermatology Assessment of Young Adult Acne Likely Concordant With In-Person Evaluation. *Journal of drugs in dermatology : JDD* 2021;20(4):432-35. doi: <https://dx.doi.org/10.36849/JDD.2021.5688>
4. McHugh ML. Interrater reliability: the kappa statistic. *Biochem Med (Zagreb)* 2012;22(3):276-82. [published Online First: 2012/10/25]
5. Altieri L, Hu J, Nguyen A, et al. Interobserver reliability of teledermatology across all Fitzpatrick skin types. *Journal of telemedicine and telecare* 2017;23(1):68-73. doi: <http://dx.doi.org/10.1177/1357633X15621226>
6. Castelo-Soccio L, Kovarik CL, Azfar RS, et al. Reliability and validity of mobile teledermatology in human immunodeficiency virus-positive patients in botswana a pilot study. *JAMA Dermatology* 2014;150(6):601-07. doi: <http://dx.doi.org/10.1001/jamadermatol.2013.7321>
7. Barbieri JS, Nelson CA, James WD, et al. The reliability of teledermatology to triage inpatient dermatology consultations. *JAMA Dermatology* 2014;150(4):419-24. doi: <http://dx.doi.org/10.1001/jamadermatol.2013.9517>
8. Barcaui CB, Lima PMO. Application of teledermoscopy in the diagnosis of pigmented lesions. *International Journal of Telemedicine and Applications* 2018;2018((Barcaui) Adjunct Professor of Dermatology, Faculty of Medical Sciences, State University of Rio de Janeiro, PhD in Medicine (Dermatology), University of Sao Paulo, Dermatology Department, Pedro Ernesto University Hospital, Rio de Janeiro State University):1624073. doi: <http://dx.doi.org/10.1155/2018/1624073>
9. Batalla A, Suh-Oh HJ, Abalde T, et al. Teledermatology in Paediatrics. Observations in daily clinical practice. *Anales de pediatria (Barcelona, Spain : 2003)* 2016;84(6):324-30. doi: <http://dx.doi.org/10.1016/j.anpedi.2015.07.005>
10. Borge A, Holst A, Gente-Lidholm A, et al. Use of the mobile phone multimedia messaging service for teledermatology. *Journal of Telemedicine and Telecare* 2012;18(5):292-96. doi: <http://dx.doi.org/10.1258/jtt.2012.120206>
11. Borge A, Terstappen K, Sandberg C, et al. Mobile teledermoscopy-there's an app for that! *Dermatology practical & conceptual* 2013;3(2):41-8. doi: <https://dx.doi.org/10.5826/dpc.0302a05>
12. Carter ZA, Li X, Goldman S, et al. Creation of an internal teledermatology store-and-forward system in an existing electronic health record: A pilot study in a safety-net public health and hospital system. *JAMA Dermatology* 2017;153(7):644-50. doi: <http://dx.doi.org/10.1001/jamadermatol.2017.0204>
13. Chen TS, Goldyne ME, Mathes EFD, et al. Pediatric teledermatology: Observations based on 429 consults. *Journal of the American Academy of Dermatology* 2010;62(1):61-66. doi: <http://dx.doi.org/10.1016/j.jaad.2009.05.039>
14. Clarke EL, Reichenberg JS, Ahmed AM, et al. The utility of teledermatology in the evaluation of skin lesions. *Journal of telemedicine and telecare* 2021(9506702, cpj):1357633X20987423. doi: <https://dx.doi.org/10.1177/1357633X20987423>
15. Costello CM, Cumsy HJL, Maly CJ, et al. Improving Access to Care Through the Establishment of a Local, Teledermatology Network. *Telemedicine journal and e-health : the official journal of the American Telemedicine Association* 2020;26(7):935-40. doi: <https://dx.doi.org/10.1089/tmj.2019.0051>
16. Duong TA, Cordoliani F, Julliard C, et al. Emergency department diagnosis and management of skin diseases with real-time teledermatologic expertise. *JAMA Dermatology* 2014;150(7):743-47. doi: <http://dx.doi.org/10.1001/jamadermatol.2013.7792>
17. Gabel CK, Nguyen E, Karmouta R, et al. Use of teledermatology by dermatology hospitalists is effective in the diagnosis and management of inpatient disease. *Journal of the American Academy of Dermatology* 2021;84(6):1547-53. doi: <https://dx.doi.org/10.1016/j.jaad.2020.04.171>
18. Gatica JL, Bertolo S, Morales E, et al. Store-and-forward teledermatology in Chile: A contribution to primary health care. *Piel* 2015;30(3):148-54. doi: <http://dx.doi.org/10.1016/j.piel.2014.07.007>
19. Gerhardt CA, Foels R, Grewe S, et al. Assessing the Diagnostic Accuracy of Teledermatology Consultations at a Local Veterans Affairs Dermatology Clinic. *Cureus* 2021;13(6):e15406. doi: <https://dx.doi.org/10.7759/cureus.15406>



- 1  
2  
3 20. Giavina-Bianchi M, Azevedo MFD, Sousa RM, et al. Part II: Accuracy of Teledermatology in Skin Neoplasms. *Frontiers in medicine* 2020;7(101648047):598903. doi: <https://dx.doi.org/10.3389/fmed.2020.598903>
- 4 21. Giavina-Bianchi M, Sousa R, Cordioli E. Part I: Accuracy of Teledermatology in Inflammatory Dermatoses. *Frontiers in medicine* 2020;7(101648047):585792. doi: <https://dx.doi.org/10.3389/fmed.2020.585792>
- 5 22. Keller JJ, Johnson JP, Latour E. Inpatient teledermatology: Diagnostic and therapeutic concordance among a  
6 hospitalist, dermatologist, and teledermatologist using store-and-forward teledermatology. *Journal of the*  
7 *American Academy of Dermatology* 2020;82(5):1262-67. doi: <https://dx.doi.org/10.1016/j.jaad.2020.01.030>
- 8 23. Lamel SA, Haldeman KM, Ely H, et al. Application of mobile teledermatology for skin cancer screening.  
9 *Journal of the American Academy of Dermatology* 2012;67(4):576-81. doi:  
10 <http://dx.doi.org/10.1016/j.jaad.2011.11.957>
- 11 24. Muir J, Xu C, Singh P, et al. Incorporating teledermatology into emergency medicine. *EMA - Emergency*  
12 *Medicine Australasia* 2011;23(5):562-68. doi: <http://dx.doi.org/10.1111/j.1742-6723.2011.01443.x>
- 13 25. Nami N, Rubegni P, Fimiani M, et al. Concordance and Time Estimation of Store-and-Forward Mobile  
14 Teledermatology Compared to Classical Face-to-Face Consultation. *Acta Dermato-Venereologica*  
15 2015;95(1):35-39. doi: <http://dx.doi.org/10.2340/00015555-1876>
- 16 26. Okita AL, Molina Tinoco LJ, Criado PR, et al. Use of Smartphones in Telemedicine: Comparative Study  
17 Between Standard and Teledermatological Evaluation of High-Complex Care Hospital Inpatients.  
18 *Telemedicine journal and e-health : the official journal of the American Telemedicine Association*  
19 2016;22(9):755-60. doi: <http://dx.doi.org/10.1089/tmj.2015.0086>
- 20 27. Patro BK, Tripathy JP, De D, et al. Diagnostic agreement between a primary care physician and a  
21 teledermatologist for common dermatological conditions in North India. *Indian dermatology online journal*  
22 2015;6(1):21-6. doi: <https://dx.doi.org/10.4103/2229-5178.148927>
- 23 28. Ribas J, Schettini APM, Ribas CBD, et al. Agreement between dermatological diagnoses made by live  
24 examination compared to analysis of digital images. *Anais Brasileiros de Dermatologia* 2010;85(4):441-47.  
25 doi: <http://dx.doi.org/10.1590/s0365-05962010000400004>
- 26 29. Rios-Yuil JM. [Correlation between face-to-face assessment and telemedicine for the diagnosis of skin disease in  
27 case conferences]. *Actas dermo-sifiliograficas* 2012;103(2):138-43. doi:  
28 <https://dx.doi.org/10.1016/j.ad.2011.05.011>
- 29 30. Romero Aguilera G, Cortina De La Calle P, Vera Iglesias E, et al. Interobserver reliability of store-and-forward  
30 teledermatology in a clinical practice setting. *Actas Dermo-Sifiliograficas* 2014;105(6):605-13. doi:  
31 <http://dx.doi.org/10.1016/j.adengl.2014.05.018>
- 32 31. Romero G, Sanchez P, Garcia M, et al. Randomized controlled trial comparing store-and-forward  
33 teledermatology alone and in combination with web-camera videoconferencing. *Clinical and Experimental*  
34 *Dermatology* 2010;35(3):311-17. doi: <http://dx.doi.org/10.1111/j.1365-2230.2009.03503.x>
- 35 32. Rubegni P, Nami N, Poggiali S, et al. Geriatric teledermatology: Store-and-forward vs. face-to-face examination.  
36 *Journal of the European Academy of Dermatology and Venereology* 2011;25(11):1334-39. doi:  
37 <http://dx.doi.org/10.1111/j.1468-3083.2011.03986.x>
- 38 33. Saleh N, Abdel Hay R, Hegazy R, et al. Can teledermatology be a useful diagnostic tool in dermatology practice  
39 in remote areas? An Egyptian experience with 600 patients. *Journal of telemedicine and telecare*  
40 2017;23(2):233-38. doi: <http://dx.doi.org/10.1177/1357633X16633944>
- 41 34. Sola-Ortigosa J, Munoz-Santos C, Masat-Tico T, et al. The Role of Teledermatology and Teledermoscopy in the  
42 Diagnosis of Actinic Keratosis and Field Cancerization. *The Journal of investigative dermatology*  
43 2020;140(10):1976-84.e4. doi: <https://dx.doi.org/10.1016/j.jid.2020.02.013>
- 44 35. Tan E, Yung A, Oakley A, et al. Successful triage of patients referred to a skin lesion clinic using  
45 teledermoscopy (IMAGE IT trial). *British Journal of Dermatology* 2010;162(4):803-11. doi:  
46 <http://dx.doi.org/10.1111/j.1365-2133.2010.09673.x>
- 47 36. Tran K, Ayad M, Monir S, et al. Mobile teledermatology in the developing world: Implications of a feasibility  
48 study on 30 Egyptian patients with common skin diseases. *Journal of the American Academy of*  
49 *Dermatology* 2011;64(2):302-09. doi: <http://dx.doi.org/10.1016/j.jaad.2010.01.010>
- 50 37. Vano-Galvan S, Aguayo-Leiva I, Rios-Buceta L, et al. Store-and-forward teledermatology: Assessment of  
51 validity in a series of 2000 observations. *Actas Dermo-Sifiliograficas* 2011;102(4):277-83. doi:  
52 [http://dx.doi.org/10.1016/S1578-2190\(11\)70803-4](http://dx.doi.org/10.1016/S1578-2190(11)70803-4)
- 53 38. Vestergaard T, Prasad SC, Schuster A, et al. Diagnostic accuracy and interobserver concordance:  
54 teledermoscopy of 600 suspicious skin lesions in Southern Denmark. *Journal of the European Academy of*  
55 *Dermatology and Venereology : JEADV* 2020;34(7):1601-08. doi: <https://dx.doi.org/10.1111/jdv.16275>
- 56  
57  
58  
59  
60

- 1  
2  
3 39. Gravely AA, Warshaw EM, Nelson DB. Reliability of store and forward teledermatology for skin neoplasms. *Journal of the American Academy of Dermatology* 2015;72(3):426-35. doi: <http://dx.doi.org/10.1016/j.jaad.2014.11.001>
- 4  
5  
6 40. Zanini M. Analyze of diagnostic concordance between face-to-face and teledermatology diagnosis. *Medicina Cutanea Ibero-Latino-Americana* 2013;41(2):60-62. doi: <http://dx.doi.org/10.4464/MC.2013.41.2.5058>
- 7  
8 41. Zink A, Kolbinger A, Leibl M, et al. The value of teledermatology using a mobile app compared to conventional dermatology. *European Journal of Dermatology* 2017;27(4):429-31. doi: <http://dx.doi.org/10.1684/ejd.2017.3044>
- 9  
10  
11 42. Zink A, Kolbinger A, Leibl M, et al. Teledermoscopy by mobile phones: Reliable help in the diagnosis of skin lesions? *Hautarzt* 2017;68(11):890-95. doi: <http://dx.doi.org/10.1007/s00105-017-4042-0>
- 12  
13 43. Marchell R, Locatis C, Liu W-L, et al. Comparing High Definition Live Interactive and Store-and-Forward Consultations to In-Person Examinations. *Telemedicine journal and e-health : the official journal of the American Telemedicine Association* 2017;23(3):213-18. doi: <http://dx.doi.org/10.1089/tmj.2016.0093>
- 14  
15  
16 44. Jones L, Jameson M, Oakley A. Remote Skin Cancer Diagnosis: Adding Images to Electronic Referrals Is More Efficient Than Wait-Listing for a Nurse-Led Imaging Clinic. *Cancers (Basel)* 2021;13(22) doi: 10.3390/cancers13225828 [published Online First: 2021/11/28]
- 17  
18  
19 45. Gonzalez Coloma F, Sandoval Garces M, Gedda Quiroga V, et al. Teledermatology in Remote Parts of Chile: Experience in 4 Isolated Rural Areas. *Actas dermo-sifiliograficas* 2019;110(8):653-58. doi: <https://dx.doi.org/10.1016/j.ad.2019.01.009>
- 20  
21  
22 46. Goulart Silveira CE, Carcano C, Mauad EC, et al. Call phone usefulness to improve the skin cancer screening: preliminary results and critical analysis of mobile app development. *Rural & Remote Health* 2019;19(1):1-7. doi: 10.22605/RRH4895
- 23  
24  
25 47. Piccoli MF, Amorim BDB, Wagner HM, et al. Teledermatology protocol for screening of Skin cancer. *Anais Brasileiros de Dermatologia* 2015;90(2):202-10. doi: <http://dx.doi.org/10.1590/abd1806-4841.20153163>
- 26  
27  
28 48. Senel E, Baba M, Durdu M. The contribution of teledermatoscopy to the diagnosis and management of non-melanocytic skin tumours. *Journal of Telemedicine and Telecare* 2013;19(1):60-63. doi: <http://dx.doi.org/10.1177/1357633X12474961>
- 29  
30  
31 49. Gravely AA, Nelson DB, Warshaw EM. Accuracy of teledermatology/teledermoscopy and clinic-based dermatology for specific categories of skin neoplasms. *Journal of the American Academy of Dermatology* 2010;63(2):348-52. doi: <http://dx.doi.org/10.1016/j.jaad.2009.10.037>
- 32  
33  
34  
35  
36  
37  
38  
39  
40  
41  
42  
43  
44  
45  
46  
47  
48  
49  
50  
51  
52  
53  
54

55 This supplementary material has been provided by the authors to give readers additional information about their work.

56  
57  
58  
59  
60



## MOOSE Checklist for Meta-analyses of Observational Studies

| Item No                                     | Recommendation                                                                                                                                                                                                                                                               | Reported on Page No     |
|---------------------------------------------|------------------------------------------------------------------------------------------------------------------------------------------------------------------------------------------------------------------------------------------------------------------------------|-------------------------|
| Reporting of background should include      |                                                                                                                                                                                                                                                                              |                         |
| 1                                           | Problem definition                                                                                                                                                                                                                                                           | 4                       |
| 2                                           | Hypothesis statement                                                                                                                                                                                                                                                         | 4                       |
| 3                                           | Description of study outcome(s)                                                                                                                                                                                                                                              | 4-5                     |
| 4                                           | Type of exposure or intervention used                                                                                                                                                                                                                                        | 6-8                     |
| 5                                           | Type of study designs used                                                                                                                                                                                                                                                   | 6-8                     |
| 6                                           | Study population                                                                                                                                                                                                                                                             | 6-8                     |
| Reporting of search strategy should include |                                                                                                                                                                                                                                                                              |                         |
| 7                                           | Qualifications of searchers (eg, librarians and investigators)                                                                                                                                                                                                               | 6                       |
| 8                                           | Search strategy, including time period included in the synthesis and key words                                                                                                                                                                                               | 6-8                     |
| 9                                           | Effort to include all available studies, including contact with authors                                                                                                                                                                                                      | 6-8                     |
| 10                                          | Databases and registries searched                                                                                                                                                                                                                                            | 6-8                     |
| 11                                          | Search software used, name and version, including special features used (eg, explosion)                                                                                                                                                                                      | 6-8                     |
| 12                                          | Use of hand searching (eg, reference lists of obtained articles)                                                                                                                                                                                                             | 6-8                     |
| 13                                          | List of citations located and those excluded, including justification                                                                                                                                                                                                        | Supplement              |
| 14                                          | Method of addressing articles published in languages other than English                                                                                                                                                                                                      | 6-8                     |
| 15                                          | Method of handling abstracts and unpublished studies                                                                                                                                                                                                                         | 6-8, Supplement         |
| 16                                          | Description of any contact with authors                                                                                                                                                                                                                                      | 6-8, Supplement         |
| Reporting of methods should include         |                                                                                                                                                                                                                                                                              |                         |
| 17                                          | Description of relevance or appropriateness of studies assembled for assessing the hypothesis to be tested                                                                                                                                                                   | 9-12                    |
| 18                                          | Rationale for the selection and coding of data (eg, sound clinical principles or convenience)                                                                                                                                                                                | 9-12                    |
| 19                                          | Documentation of how data were classified and coded (eg, multiple raters, blinding and interrater reliability)                                                                                                                                                               | 9-12                    |
| 20                                          | Assessment of confounding (eg, comparability of cases and controls in studies where appropriate)                                                                                                                                                                             | 9-12                    |
| 21                                          | Assessment of study quality, including blinding of quality assessors, stratification or regression on possible predictors of study results                                                                                                                                   | 9-12                    |
| 22                                          | Assessment of heterogeneity                                                                                                                                                                                                                                                  | 9-12                    |
| 23                                          | Description of statistical methods (eg, complete description of fixed or random effects models, justification of whether the chosen models account for predictors of study results, dose-response models, or cumulative meta-analysis) in sufficient detail to be replicated | 9-12                    |
| 24                                          | Provision of appropriate tables and graphics                                                                                                                                                                                                                                 | 9-12, Supplement        |
| Reporting of results should include         |                                                                                                                                                                                                                                                                              |                         |
| 25                                          | Graphic summarizing individual study estimates and overall estimate                                                                                                                                                                                                          | Fig 1-3, Supplement     |
| 26                                          | Table giving descriptive information for each study included                                                                                                                                                                                                                 | Tables 1, 2, Supplement |
| 27                                          | Results of sensitivity testing (eg, subgroup analysis)                                                                                                                                                                                                                       | 9-12                    |
| 28                                          | Indication of statistical uncertainty of findings                                                                                                                                                                                                                            | 9-12                    |

| Item No                                 | Recommendation                                                                                                            | Reported on Page No |
|-----------------------------------------|---------------------------------------------------------------------------------------------------------------------------|---------------------|
| Reporting of discussion should include  |                                                                                                                           |                     |
| 29                                      | Quantitative assessment of bias (eg, publication bias)                                                                    | 9-12                |
| 30                                      | Justification for exclusion (eg, exclusion of non-English language citations)                                             | 9-12                |
| 31                                      | Assessment of quality of included studies                                                                                 | 9-12                |
| Reporting of conclusions should include |                                                                                                                           |                     |
| 32                                      | Consideration of alternative explanations for observed results                                                            | 13-17               |
| 33                                      | Generalization of the conclusions (ie, appropriate for the data presented and within the domain of the literature review) | 13-17               |
| 34                                      | Guidelines for future research                                                                                            | 13-17               |
| 35                                      | Disclosure of funding source                                                                                              | 18                  |

From: Stroup DF, Berlin JA, Morton SC, et al, for the Meta-analysis Of Observational Studies in Epidemiology (MOOSE) Group. Meta-analysis of Observational Studies in Epidemiology. A Proposal for Reporting. *JAMA*. 2000;283(15):2008-2012. doi: 10.1001/jama.283.15.2008.

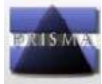

## PRISMA 2020 Checklist

| Section and Topic             | Item # | Checklist item                                                                                                                                                                                                                                                                                       | Location where item is reported |
|-------------------------------|--------|------------------------------------------------------------------------------------------------------------------------------------------------------------------------------------------------------------------------------------------------------------------------------------------------------|---------------------------------|
| <b>TITLE</b>                  |        |                                                                                                                                                                                                                                                                                                      |                                 |
| Title                         | 1      | Identify the report as a systematic review.                                                                                                                                                                                                                                                          | p1                              |
| <b>ABSTRACT</b>               |        |                                                                                                                                                                                                                                                                                                      |                                 |
| Abstract                      | 2      | See the PRISMA 2020 for Abstracts checklist.                                                                                                                                                                                                                                                         | p3-4                            |
| <b>INTRODUCTION</b>           |        |                                                                                                                                                                                                                                                                                                      |                                 |
| Rationale                     | 3      | Describe the rationale for the review in the context of existing knowledge.                                                                                                                                                                                                                          | p5-6                            |
| Objectives                    | 4      | Provide an explicit statement of the objective(s) or question(s) the review addresses.                                                                                                                                                                                                               | p5-6                            |
| <b>METHODS</b>                |        |                                                                                                                                                                                                                                                                                                      |                                 |
| Eligibility criteria          | 5      | Specify the inclusion and exclusion criteria for the review and how studies were grouped for the syntheses.                                                                                                                                                                                          | p8, Supplementary p15           |
| Information sources           | 6      | Specify all databases, registers, websites, organisations, reference lists and other sources searched or consulted to identify studies. Specify the date when each source was last searched or consulted.                                                                                            | p7                              |
| Search strategy               | 7      | Present the full search strategies for all databases, registers and websites, including any filters and limits used.                                                                                                                                                                                 | Supplementary p2                |
| Selection process             | 8      | Specify the methods used to decide whether a study met the inclusion criteria of the review, including how many reviewers screened each record and each report retrieved, whether they worked independently, and if applicable, details of automation tools used in the process.                     | p8                              |
| Data collection process       | 9      | Specify the methods used to collect data from reports, including how many reviewers collected data from each report, whether they worked independently, any processes for obtaining or confirming data from study investigators, and if applicable, details of automation tools used in the process. | p8                              |
| Data items                    | 10a    | List and define all outcomes for which data were sought. Specify whether all results that were compatible with each outcome domain in each study were sought (e.g. for all measures, time points, analyses), and if not, the methods used to decide which results to collect.                        | Supplementary p15               |
|                               | 10b    | List and define all other variables for which data were sought (e.g. participant and intervention characteristics, funding sources). Describe any assumptions made about any missing or unclear information.                                                                                         | p8 and Supplementary p15        |
| Study risk of bias assessment | 11     | Specify the methods used to assess risk of bias in the included studies, including details of the tool(s) used, how many reviewers assessed each study and whether they worked independently, and if applicable, details of automation tools used in the process.                                    | p9                              |
| Effect measures               | 12     | Specify for each outcome the effect measure(s) (e.g. risk ratio, mean difference) used in the synthesis or presentation of results.                                                                                                                                                                  | p8-9                            |
| Synthesis methods             | 13a    | Describe the processes used to decide which studies were eligible for each synthesis (e.g. tabulating the study intervention characteristics and comparing against the planned groups for each synthesis (item #5)).                                                                                 | p8-9                            |
|                               | 13b    | Describe any methods required to prepare the data for presentation or synthesis, such as handling of missing summary statistics, or data conversions.                                                                                                                                                | p 8-9<br>Supplementary p2       |
|                               | 13c    | Describe any methods used to tabulate or visually display results of individual studies and syntheses.                                                                                                                                                                                               | p 8-9<br>Supplementary p2       |
|                               | 13d    | Describe any methods used to synthesize results and provide a rationale for the choice(s). If meta-analysis was performed, describe the model(s), method(s) to identify the presence and extent of statistical heterogeneity, and software package(s) used.                                          | p 8-9<br>Supplementary p2       |
|                               | 13e    | Describe any methods used to explore possible causes of heterogeneity among study results (e.g. subgroup analysis, meta-regression).                                                                                                                                                                 | p 8-9<br>Supplementary p2       |
|                               | 13f    | Describe any sensitivity analyses conducted to assess robustness of the synthesized results.                                                                                                                                                                                                         | NA                              |
| Reporting bias assessment     | 14     | Describe any methods used to assess risk of bias due to missing results in a synthesis (arising from reporting biases).                                                                                                                                                                              | p9                              |
| Certainty assessment          | 15     | Describe any methods used to assess certainty (or confidence) in the body of evidence for an outcome.                                                                                                                                                                                                | NA                              |

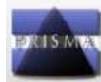

## PRISMA 2020 Checklist

| Section and Topic                              | Item # | Checklist item                                                                                                                                                                                                                                                                       | Location where item is reported        |
|------------------------------------------------|--------|--------------------------------------------------------------------------------------------------------------------------------------------------------------------------------------------------------------------------------------------------------------------------------------|----------------------------------------|
| <b>RESULTS</b>                                 |        |                                                                                                                                                                                                                                                                                      |                                        |
| Study selection                                | 16a    | Describe the results of the search and selection process, from the number of records identified in the search to the number of studies included in the review, ideally using a flow diagram.                                                                                         | Figure 1, p10                          |
|                                                | 16b    | Cite studies that might appear to meet the inclusion criteria, but which were excluded, and explain why they were excluded.                                                                                                                                                          | Supplementary p23-3                    |
| Study characteristics                          | 17     | Cite each included study and present its characteristics.                                                                                                                                                                                                                            | p10-11, Table 1, 2                     |
| Risk of bias in studies                        | 18     | Present assessments of risk of bias for each included study.                                                                                                                                                                                                                         | p15, Supplementary eTable 5            |
| Results of individual studies                  | 19     | For all outcomes, present, for each study: (a) summary statistics for each group (where appropriate) and (b) an effect estimate and its precision (e.g. confidence/credible interval), ideally using structured tables or plots.                                                     | p15, Supplementary eTable 5            |
| Results of syntheses                           | 20a    | For each synthesis, briefly summarise the characteristics and risk of bias among contributing studies.                                                                                                                                                                               | Figure 2, 3, Supplementary eFigure 1-5 |
|                                                | 20b    | Present results of all statistical syntheses conducted. If meta-analysis was done, present for each the summary estimate and its precision (e.g. confidence/credible interval) and measures of statistical heterogeneity. If comparing groups, describe the direction of the effect. | p 11-13<br>Supplementary p3            |
|                                                | 20c    | Present results of all investigations of possible causes of heterogeneity among study results.                                                                                                                                                                                       | p 11-13<br>Supplementary p3            |
|                                                | 20d    | Present results of all sensitivity analyses conducted to assess the robustness of the synthesized results.                                                                                                                                                                           | NA                                     |
| Reporting biases                               | 21     | Present assessments of risk of bias due to missing results (arising from reporting biases) for each synthesis assessed.                                                                                                                                                              | Supplementary eTable 5                 |
| Certainty of evidence                          | 22     | Present assessments of certainty (or confidence) in the body of evidence for each outcome assessed.                                                                                                                                                                                  | p 11-13<br>Supplementary p3            |
| <b>DISCUSSION</b>                              |        |                                                                                                                                                                                                                                                                                      |                                        |
| Discussion                                     | 23a    | Provide a general interpretation of the results in the context of other evidence.                                                                                                                                                                                                    | p14                                    |
|                                                | 23b    | Discuss any limitations of the evidence included in the review.                                                                                                                                                                                                                      | p15-16                                 |
|                                                | 23c    | Discuss any limitations of the review processes used.                                                                                                                                                                                                                                | p16                                    |
|                                                | 23d    | Discuss implications of the results for practice, policy, and future research.                                                                                                                                                                                                       | p17                                    |
| <b>OTHER INFORMATION</b>                       |        |                                                                                                                                                                                                                                                                                      |                                        |
| Registration and protocol                      | 24a    | Provide registration information for the review, including register name and registration number, or state that the review was not registered.                                                                                                                                       | p7                                     |
|                                                | 24b    | Indicate where the review protocol can be accessed, or state that a protocol was not prepared.                                                                                                                                                                                       | p7                                     |
|                                                | 24c    | Describe and explain any amendments to information provided at registration or in the protocol.                                                                                                                                                                                      | NA                                     |
| Support                                        | 25     | Describe sources of financial or non-financial support for the review, and the role of the funders or sponsors in the review.                                                                                                                                                        | p18                                    |
| Competing interests                            | 26     | Declare any competing interests of review authors.                                                                                                                                                                                                                                   | p18                                    |
| Availability of data, code and other materials | 27     | Report which of the following are publicly available and where they can be found: template data collection forms; data extracted from included studies; data used for all analyses; analytic code; any other materials used in the review.                                           |                                        |

From: Page MJ, McKenzie JE, Bossuyt PM, Boutron I, Hoffmann TC, Mulrow CD, et al. The PRISMA 2020 statement: an updated guideline for reporting systematic reviews. *BMJ* 2021;372:n71. doi: 10.1136/bmj.n71

For peer review only - <http://bmjopen.bmj.com/site/about/guidelines.xhtml>  
For more information, visit: <http://www.prisma-statement.org/>

# BMJ Open

## Diagnostic Reliability in Teledermatology: A Systematic Review and a Meta-Analysis

|                                 |                                                                                                                                                                                                                                                                                                                                                                                                                                                                                                                                                                                                 |
|---------------------------------|-------------------------------------------------------------------------------------------------------------------------------------------------------------------------------------------------------------------------------------------------------------------------------------------------------------------------------------------------------------------------------------------------------------------------------------------------------------------------------------------------------------------------------------------------------------------------------------------------|
| Journal:                        | <i>BMJ Open</i>                                                                                                                                                                                                                                                                                                                                                                                                                                                                                                                                                                                 |
| Manuscript ID                   | bmjopen-2022-068207.R2                                                                                                                                                                                                                                                                                                                                                                                                                                                                                                                                                                          |
| Article Type:                   | Original research                                                                                                                                                                                                                                                                                                                                                                                                                                                                                                                                                                               |
| Date Submitted by the Author:   | 12-Jul-2023                                                                                                                                                                                                                                                                                                                                                                                                                                                                                                                                                                                     |
| Complete List of Authors:       | Bourkas, Adrienn; Queen's University School of Medicine<br>Barone, Natasha; McGill University Montreal, Faculty of Medicine and Health Sciences<br>Bourkas, Matthew; University of Toronto, Department of Biochemistry<br>Mannarino, Matthew; McGill University, Department of Surgery<br>Fraser, Robert; Western University Arthur Labatt Family School of Nursing, Nursing; Swift Medical<br>Lorincz, Amy; Independent researcher<br>Wang, Sheila; McGill University Department of Medicine, Dermatology; Swift Medical<br>Ramirez-GarciaLuna, Jose; McGill University, Department of Surgery |
| <b>Primary Subject Heading</b>: | Dermatology                                                                                                                                                                                                                                                                                                                                                                                                                                                                                                                                                                                     |
| Secondary Subject Heading:      | Health informatics, General practice / Family practice                                                                                                                                                                                                                                                                                                                                                                                                                                                                                                                                          |
| Keywords:                       | Telemedicine < BIOTECHNOLOGY & BIOINFORMATICS, DERMATOLOGY, PRIMARY CARE, Information technology < BIOTECHNOLOGY & BIOINFORMATICS, STATISTICS & RESEARCH METHODS                                                                                                                                                                                                                                                                                                                                                                                                                                |
|                                 |                                                                                                                                                                                                                                                                                                                                                                                                                                                                                                                                                                                                 |

SCHOLARONE™  
Manuscripts

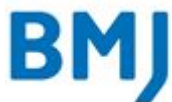

I, the Submitting Author has the right to grant and does grant on behalf of all authors of the Work (as defined in the below author licence), an exclusive licence and/or a non-exclusive licence for contributions from authors who are: i) UK Crown employees; ii) where BMJ has agreed a CC-BY licence shall apply, and/or iii) in accordance with the terms applicable for US Federal Government officers or employees acting as part of their official duties; on a worldwide, perpetual, irrevocable, royalty-free basis to BMJ Publishing Group Ltd ("BMJ") its licensees and where the relevant Journal is co-owned by BMJ to the co-owners of the Journal, to publish the Work in this journal and any other BMJ products and to exploit all rights, as set out in our [licence](#).

The Submitting Author accepts and understands that any supply made under these terms is made by BMJ to the Submitting Author unless you are acting as an employee on behalf of your employer or a postgraduate student of an affiliated institution which is paying any applicable article publishing charge ("APC") for Open Access articles. Where the Submitting Author wishes to make the Work available on an Open Access basis (and intends to pay the relevant APC), the terms of reuse of such Open Access shall be governed by a Creative Commons licence – details of these licences and which [Creative Commons](#) licence will apply to this Work are set out in our licence referred to above.

Other than as permitted in any relevant BMJ Author's Self Archiving Policies, I confirm this Work has not been accepted for publication elsewhere, is not being considered for publication elsewhere and does not duplicate material already published. I confirm all authors consent to publication of this Work and authorise the granting of this licence.

1 **Title:** Diagnostic Reliability in Teledermatology: A Systematic Review and a Meta-Analysis

2  
3  
4  
5  
6  
7  
8 **Authors**

9  
10 Adrienn N. Bourkas\*<sup>1</sup> (MSc), Natasha Barone\*<sup>2</sup> (MD, MSc), Matthew E.C. Bourkas<sup>3</sup> (PhD),  
11  
12 Matthew Mannarino<sup>4</sup> (PhD), Robert D. J. Fraser<sup>5,6</sup> (RN, MN), Amy Lorincz (MSc), Sheila C.  
13  
14 Wang<sup>5,7</sup> (MD, PhD), Jose L. Ramirez-GarciaLuna<sup>4</sup> (MD, PhD)

15  
16  
17 \* Authors contributed equally

18  
19  
20  
21 **Affiliations**

22  
23  
24 <sup>1</sup>Faculty of Health Sciences, Queen's University School of Medicine, Kingston, Ontario, Canada

25  
26 <sup>2</sup>Faculty of Medicine and Health Sciences, McGill University, Montreal, Quebec, Canada

27  
28 <sup>3</sup>Temerty Faculty of Medicine, Department of Biochemistry, University of Toronto, Toronto,  
29  
30 Ontario, Canada

31  
32  
33 <sup>4</sup>Department of Surgery, McGill University, Montreal, Quebec, Canada

34  
35  
36 <sup>5</sup>Swift Medical Inc., Toronto, Ontario, Canada

37  
38 <sup>6</sup>Arthur Labatt Family School of Nursing, Western University, London, Ontario, Canada

39  
40 <sup>7</sup>Department of Medicine, Division of Dermatology, McGill University Health Centre, Montreal,  
41  
42 Quebec, Canada

43  
44  
45  
46  
47 **Corresponding author**

48  
49 Jose L. Ramirez-GarciaLuna, MD, PhD

50  
51 Research Institute-McGill University Health Centre

52  
53  
54 Montreal General Hospital 1650 Cedar Ave, Montreal, Quebec, Canada H3G 1A4



1  
2  
3 24 Tel: 514-934-1934 ext 44522  
4  
5 25 Email: [ramirezgl@gmail.com](mailto:ramirezgl@gmail.com)  
6  
7  
8  
9  
10  
11  
12  
13  
14  
15  
16  
17  
18  
19  
20  
21  
22  
23  
24  
25  
26  
27  
28  
29  
30  
31  
32  
33  
34  
35  
36  
37  
38  
39  
40  
41  
42  
43  
44  
45  
46  
47  
48  
49  
50  
51  
52  
53  
54  
55  
56  
57  
58  
59  
60

For peer review only

## 26 **Abstract**

27 Objectives: To compare teledermatology and face-to-face (F2F) agreement in primary diagnoses  
28 of dermatological conditions.

29 Design: Systematic Review and Meta-Analysis

30 Methods: MEDLINE, Embase, Cochrane Library (Wiley), CINAHL, and medRxiv were  
31 searched between January 2010 and May 2022. Observational studies and randomized clinical  
32 trials that reported percentage agreement or kappa concordance for primary diagnoses between  
33 teledermatology and F2F physicians were included. Titles, abstracts, and full-text articles were  
34 screened in duplicate. From 7,173 citations, 44 articles were included. A random-effects meta-  
35 analysis was conducted to estimate pooled estimates. Primary outcome measures were mean  
36 percentage and kappa concordance for assessing diagnostic matches between teledermatology  
37 and F2F physicians. Secondary outcome measures included the agreement between  
38 teledermatologists, F2F dermatologists, and teledermatology and histopathology results.

39 Results: 44 studies were extracted and reviewed. The pooled agreement rate was 68.9%, and  
40 kappa concordance was 0.67. When dermatologists conducted F2F and teledermatology consults,  
41 the overall diagnostic agreement was significantly higher at 71%, compared to 44% for non-  
42 specialists. Kappa concordance was 0.69 for teledermatologist vs specialist and 0.52 for non-  
43 specialists. Higher diagnostic agreements were also noted with image acquisition training and  
44 digital photography. The agreement rate was 76.4% between teledermatologists, 82.4% between  
45 F2F physicians, and 55.7% between teledermatology and histopathology.

46 Conclusions and Relevance: Teledermatology can be an attractive option particularly in  
47 resource-poor settings. Future efforts should be placed on incorporating image acquisition  
48 training and access to high-quality imaging technologies.

1  
2  
3 49 Registration number: 10.17605/OSF.IO/FJDVG  
4  
5  
6 50  
7

8 51 **Keywords:** teledermatology, dermatology consultations, store-and-forward, telemedicine,  
9  
10 52 remote consultation, dermatology hospitalists  
11  
12 53  
13

14 54 **Article Summary:**

15 55 Strengths and limitations of this study:  
16  
17  
18

- 19 56 ● This is the most comprehensive systematic review and meta-analysis of the topic to date  
20  
21 57 without language restrictions applied.  
22  
23 58 ● Inclusion criteria were broad, including all types of dermatological diseases, imaging  
24  
25 59 technologies, in-person physician specializations (GPs, hospitalists, and dermatologists),  
26  
27 60 and the presence or absence of image acquisition training.  
28  
29 61 ● The article search was limited to 2010 and later due to the recent incorporation of  
30  
31 62 smartphones in teledermatology practices.  
32  
33 63 ● Due to considerable heterogeneity between studies, meta-analysis and synthesis of  
34  
35 64 predictors for accurate diagnoses remotely were limited even after subgrouping.  
36  
37  
38  
39  
40  
41  
42  
43  
44  
45  
46  
47  
48  
49  
50  
51  
52  
53  
54  
55  
56  
57  
58  
59  
60

## 65 Introduction

66 With the emergence of COVID-19, the introduction of virtual consults in healthcare settings,  
67 especially dermatology, has been expanded to allow many patients the opportunity for equitable  
68 access to care when in-person appointments pose a challenge and risk to patients.(1) Different  
69 modalities were introduced to support teledermatology. This involves remote sharing of patient  
70 data, including synchronous video-streaming teledermatology and asynchronous sharing of still  
71 images via emails, or text messages, or store-and-forward teledermatology (SFTD).

72  
73 Although both synchronous and asynchronous approaches have been shown to be cost-effective,  
74 SFTD is particularly popular as it requires fewer resources and less coordination than synchronous  
75 teledermatology.(2, 3) With the advent of higher resolution smartphone cameras, relatively  
76 minimal training is required to capture data for remote dermatologists correctly; multiple SFTD  
77 studies opted to provide no training in image capture and still found value in teledermatology.(4,  
78 5)

79  
80 There is valid concern over the reliability of teledermatology given the significant variability in  
81 diagnostic accuracy predicted across pre-pandemic research.(6) This is expected given the lack of  
82 standardization across studies and the potential for confounders across teledermatology  
83 methodologies and applications, e.g., level of training or skin lesion type. This variability in  
84 approach may benefit from an increased demand, which could provide greater impetus to optimize  
85 and standardize teledermatology.

86

1  
2  
3 87 To our knowledge, this is the first and most inclusive meta-analysis (MA) that compares  
4  
5 88 teledermatology consults to face-to-face (F2F) that looked at all relevant studies without overly  
6  
7  
8 89 exclusive inclusion criteria. The primary objective of this study was to compare the reliability of  
9  
10 90 teledermatology diagnoses to F2F consults, as determined by Cohen's kappa interrater agreement  
11  
12 91 and total agreement rates. Teledermatology can assume important roles as a routine complement  
13  
14 92 to primary care and an alternate route to the typical in-person referrals. Consequently, we wanted  
15  
16 93 to determine agreement for teledermatology and all F2F consults, teledermatology and F2F  
17  
18 94 primary care consults, and finally teledermatology and F2F dermatologist consults, which would  
19  
20 95 arguably best capture the limitations introduced by the change in medium from F2F to  
21  
22 96 teledermatology.  
23  
24  
25

26 97  
27  
28 98 Additional subset analyses were performed to control for potential confounders (e.g.,  
29  
30 99 inflammatory vs. malignant, staff training for image acquisition, teledermoscopy, and smartphone  
31  
32 100 vs digital cameras) introduced by the heterogenous methodology. The secondary objectives sought  
33  
34 101 to determine the agreement rate within teledermatology diagnoses and F2F consults to provide an  
35  
36 102 idea of each medium's consistency, and provide the best estimate of accuracy for the agreement  
37  
38 103 rate between teledermatology and histopathology.  
39  
40  
41  
42  
43  
44  
45  
46  
47  
48  
49  
50  
51  
52  
53  
54  
55  
56  
57  
58  
59  
60

## 104 **Methods**

105 This study was reported in accordance with the Preferred Reported Items for Systematic Reviews  
106 and Meta-Analyses (PRISMA) guidelines.

### 108 Protocol Registration

109 Prior to the conduct of this review, a protocol which adhered to the PRISMA-protocols (i.e.,  
110 PRISMA-P) guidelines was developed and then registered on Open Science Framework (OSF).

111 Access: <https://osf.io/fjdvg>.(7)

### 113 Search Strategy

114 A comprehensive search of major bibliographic databases, MEDLINE, Embase, Cochrane Library  
115 (Wiley), CINAHL, and medRxiv was performed in August 2021. MEDLINE was searched again  
116 between August 2021 and May 2022 to screen any new articles published after our protocol was  
117 registered. The search strategy was developed by a medical librarian at Queen's University  
118 (Kingston, ON). Please see the supplementary appendix for additional information on the search  
119 strategy.

121 No restrictions were placed on the language or status of the publications. Search results were  
122 limited to studies published between January 2010 and May 2022 due to the novelty of  
123 incorporating smartphones in tele dermatology remote consultations.(8) The International  
124 Prospective Register of Systematic Reviews (PROSPERO) and OSF were searched up to May  
125 2022 for relevant ongoing systematic reviews using the terms 'telemedicine,' 'tele dermatology,'

1  
2  
3 126 'dermatology,' 'diagnostic accuracy,' and 'diagnostic concordance.' Reference lists of included  
4  
5 127 studies were screened to identify additional studies not captured in the search.  
6  
7

8 128

9  
10 129 Eligibility Criteria

11  
12 130 Studies evaluating the diagnostic reliability of teledermatology that reported on patients with  
13  
14 131 dermatological conditions assessed by a clinician using asynchronous or synchronous telemedicine  
15  
16 132 systems were included. All articles were required to compare tele- to F2F diagnoses conducted by  
17  
18 133 a physician. In this context, an 'F2F physician' refers to healthcare professionals, such as  
19  
20 134 dermatologists, general practitioners, or emergency department physicians, who conducted in-  
21  
22 135 person assessments only. This term is used to represent the comparison group in our analyses, and  
23  
24 136 these assessments may occur concurrently or sequentially with teledermatology consultations,  
25  
26 137 depending on the case. Exclusion criteria encompassed survey articles, feasibility studies, non-  
27  
28 138 dermatological telemedicine studies, cost-effectiveness studies, editorials, review articles, studies  
29  
30 139 using teledermatology as the reference standard, studies comparing only dermatoscopic images  
31  
32 140 without clinical images, and studies where patients captured their own photographs. The latter was  
33  
34 141 excluded to ensure consistent image quality, enabling a more accurate comparison of diagnostic  
35  
36 142 reliability between tele- and F2F methods. Included articles are summarized in **eTable 1** in the  
37  
38 143 supplementary appendix. Inclusion and exclusion criteria are summarized in **eTable 2**, available  
39  
40 144 in the supplementary appendix.  
41  
42  
43  
44  
45  
46  
47  
48

49 146 Data Selection & Extraction

50  
51 147 Following the removal of duplicated citations, the titles and abstracts were screened. Following  
52  
53 148 this step, a full-text assessment was conducted. At both stages, two reviewers performed screening  
54  
55  
56  
57  
58  
59  
60



1  
2  
3 149 independently [AB and NB]. Any disagreements were resolved through consensus by the two  
4  
5 150 reviewers and when necessary, through discussion with a third reviewer [JLRG].  
6  
7

8 151  
9  
10 152 A data collection form was created on the *Covidence* website and piloted by two reviewers [AB,  
11  
12 153 NB]. Three additional reviewers assisted with data extraction [JLRG, MB, MM]. Two reviewers  
13  
14 154 were assigned to each paper. One reviewer extracted all characteristics of the included literature,  
15  
16 155 and the second reviewer validated the characteristics for accuracy. Any disagreements were  
17  
18 156 resolved by consensus. In the supplementary appendix, **eTable 3** summarizes the information  
19  
20 157 extracted from full-text articles.  
21  
22  
23

#### 24 158 25 26 159 Data Synthesis

27  
28 160 This meta-analysis assessed the effectiveness of SFTD technologies and live video conferencing  
29  
30 161 in diagnosing skin conditions. Outcomes regarding complete diagnostic percentage agreement  
31  
32 162 rates and Cohen's kappa concordance were evaluated separately, with some studies being part of  
33  
34 163 both analyses if they reported both variables. The patient, intervention type, lesion, and geographic  
35  
36 164 characteristics were summarized qualitatively. Please see the supplementary appendix and **eTable**  
37  
38 165 **4** for more details on data synthesis and nomenclature for each study grouping.  
39  
40  
41  
42 166

#### 43 44 167 Risk of Bias

45  
46 168 Three reviewers [AB, NB, MB] completed the risk of bias assessment; all studies were  
47  
48 169 independently reviewed. Version 2 of the Cochrane risk-of-bias tool for randomized trials (RoB  
49  
50 170 2) was used to assess the risk of bias in three randomized trials.(9, 10, 11) RoB 2 is structured into  
51  
52 171 a fixed set of domains of bias, focusing on different aspects of trial design, conduct, and  
53  
54  
55  
56  
57  
58  
59  
60

1  
2  
3 172 reporting.(12) The Quality Assessment of Diagnostic Assessment of Diagnostic Accuracy (2<sup>nd</sup>  
4  
5 173 Edition, QUADAS-2) was used to assess the risk of bias. Uncertain risk of bias was assigned to  
6  
7 174 studies with insufficient information except for studies that were likely to be biased due to missing  
8  
9 175 data. In the latter case, a high risk of bias was assigned.  
10  
11  
12 176

### 13 14 177 Synthesis of Results

15  
16  
17 178 Statistical analysis was performed using the dmetar package in R v.4.0.1 (R Foundation for  
18  
19 179 Statistical Computing, 2022). Agreement rates and Cohen's kappa concordances for unique study  
20  
21 180 groupings were treated as individual and independent values. For the percentage of agreement,  
22  
23 181 meta-analyses were conducted using the aggregated data, and proportions were calculated with the  
24  
25 182 corresponding 95 percent confidence intervals (CI). Point-biserial correlations were utilized to  
26  
27 183 calculate pooled kappa values. Statistical heterogeneity was investigated using the I<sup>2</sup> index and the  
28  
29 184  $\tau^2$  statistic, leading to the use of a random-effects model for overall complications with a logit  
30  
31 185 transformation due to the high degree of heterogeneity. Possible sources of heterogeneity were  
32  
33 186 explored through sub-group analysis, and confounding factors were controlled using meta-  
34  
35 187 regression. A random-effects model, as proposed by DerSimonian and Laird, was chosen as the  
36  
37 188 primary method to estimate all pooled estimates. Further details on the statistical analysis can be  
38  
39 189 found in the supplementary appendix.  
40  
41  
42  
43  
44  
45  
46

### 47 191 Patient and Public Involvement

48  
49 192 Patients or the public were not involved in our research's design, conduct, reporting, or  
50  
51 193 dissemination plans.  
52  
53  
54  
55  
56  
57  
58  
59  
60

## 194 **Results**

195 A total of 7,173 studies were screened for eligibility of which 44 were included in this study. Of  
196 these, 40 studies reported diagnostic agreement rates (4, 5, 9, 10, 11, 13, 14, 15, 16, 17, 18, 19, 20,  
197 21, 22, 23, 24, 25, 26, 27, 28, 29, 30, 31, 32, 33, 34, 35, 36, 37, 38, 39, 40, 41, 42, 43, 44, 45, 46,  
198 47) and 21 studies reported kappa concordance.(5, 9, 13, 14, 19, 22, 25, 28, 29, 30, 31, 32, 33, 35,  
199 36, 37, 48, 49, 50, 51, 52) Further details are provided in the PRISMA diagram in **Figure 1**. The  
200 complete list of excluded studies can be found in the supplementary appendix, **eTable 5**.

201

### 202 Study and patient characteristics

203 **eTable 1** summarizes the study and participant characteristics for the 44 included papers. Forty  
204 one of the included studies were observational, of which 32 were prospective, eight were  
205 retrospective. One study was ambispective. Two studies were randomized controlled trials and one  
206 study was a quasi-randomized trial. Studies selected for the review included a total of 52,075  
207 patients (Range: 26 to 24,210 patients). Some patients had multiple lesions and the total number  
208 of lesions included in the study was 57,222 (Range: 26 to 27,519 lesions).

209

210 The mean age reported in 27 (61%) studies was  $54.78 \pm 15.69$  years (Range: 0 to 100 years old).  
211 Thirty-four (77%) studies reported participant gender, with a mean of 57% females (Range: 3.2%  
212 to 74%). Only 13 (29%) studies reported information on Fitzpatrick skin types, ethnicity, or race.  
213 Twenty-eight studies (64%) included in this analysis were inclusive of all types of dermatoses, 13  
214 (29%) studies looked specifically at suspicious lesions, and three (7%) studies excluded skin  
215 cancers completely.

216

217 Diagnostic reliability of teledermatology when compared to F2F (specialist and non-specialist)  
218 evaluation

219 We assessed the diagnostic reliability of teledermatology compared to F2F evaluations by  
220 analyzing diagnostic agreement rates and concordance. The overall diagnostic agreement rate  
221 ranged from 13.9% to 98.0% (mean 68.9%, CI 64.4% to 73.1%), with a concordance that ranged  
222 from 0.21 to 0.96 (mean 0.67, CI 0.60 to 0.74). See **eFigure 1** and the supplementary appendix  
223 for further details.

224  
225 **Sub-group analyses**

226  
227 Diagnostic agreement between teledermatologist and teledermatologist, F2F and F2F physicians,  
228 and teledermatology and histopathology

229 See supplementary appendix and **eFigure 2** for further details.

230  
231 Diagnostic reliability of teledermatologist vs F2F specialist and non-specialist

232 Teledermatologists' 70.96% agreement rate with F2F dermatologists significantly exceeded the  
233 44.1% rate from non-specialists ( $p < 0.001$ ). Non-specialists consistently showed lower diagnostic  
234 concordance across studies; see supplementary appendix and **eFigure 3** for further details.

235  
236 Diagnostic reliability of teledermatology vs F2F by training provided for image acquisition

237 Twenty studies with 37 unique comparisons explicitly provided training to those in charge of  
238 image acquisition shown in **Figure 2**.(9, 10, 11, 14, 15, 16, 19, 20, 23, 26, 29, 32, 35, 36, 37, 38,

1  
2  
3 239 39, 40, 41, 43, 44) The mean agreement rate between teledermatology and F2F physicians in these  
4  
5 240 studies was 75.9% (CI 74.4% to 77.27%), significantly higher than the 62.1% (CI 60.5% to 63.7%)  
6  
7 241 observed when no training was provided ( $p = 0.033$ , heterogeneity:  $I^2 = 98\%$ ). Concordance  
8  
9 242 values were also higher when training was provided (mean 0.77, CI 0.66-0.84) compared to when  
10  
11 243 no training was provided (mean 0.60, CI 0.49-0.69) ( $p = 0.01$ ,  $I^2=98\%$ ).  
12  
13  
14  
15 244

#### 17 245 Diagnostic reliability of teledermatology vs F2F by type of technology used for image acquisition

18  
19 246 Approximately half of the studies with 41 unique comparisons that compared Teledermatologists  
20  
21 247 with F2F physicians used digital cameras for image acquisition. Eighteen studies comparing F2F  
22  
23 248 and teledermatology agreement rates with 26 unique comparisons reported the use of smartphones  
24  
25 249 and tablets for image acquisition. **Figure 3** shows that the mean percentage agreement rate for  
26  
27 250 digital cameras was 71.7% (CI 70.3% to 73.1% compared to 59.8% (CI 57.2% to 62.3%) for  
28  
29 251 smartphones or tablets. The higher agreement rate with digital photography was statistically  
30  
31 252 significant ( $p = 0.029$ , heterogeneity:  $I^2=98\%$ ). The concordance values for digital photography  
32  
33 253 were reported for twelve studies with a mean of 0.70 (CI 0.61 to 0.76). Concordance values for  
34  
35 254 smartphone or tablet technologies were reported for eight studies with a mean of 0.62 (CI 0.38 to  
36  
37 255 0.78). The higher concordance with digital photography was statistically significant ( $p = 0.003$ ,  
38  
39 256 heterogeneity:  $I^2=100\%$ ).  
40  
41  
42  
43  
44  
45 257

#### 47 258 Other sub-group analyses

48  
49 259 No statistically significant patterns could be identified with the inclusion of teledermoscopy in  
50  
51 260 addition to clinical images (**eFigure 4**), lesion type (**eFigure 5**), grouping studies as pre- or post-  
52  
53  
54  
55  
56  
57  
58  
59  
60

1  
2  
3 261 pandemic (figure not shown), or risk of bias (figure not shown). Please see the supplementary  
4  
5 262 appendix for further details.  
6

7  
8 263

9  
10 264 **Quality assessment**

11  
12 265 The quality assessment results for risk of bias and applicability in individual studies are displayed  
13  
14 266 in the supplementary appendix and **eTable 6**.  
15

16  
17 267

18  
19 268 **Discussion:**

20  
21 269 To our knowledge, this study constitutes the most extensive systematic review and meta-analysis  
22  
23 270 on teledermatology, including 44 studies across four languages.  
24

25  
26 271

27  
28 272 Our sub-group analyses revealed that agreement rates between teledermatology consultations and  
29  
30 273 F2F physicians were significantly higher when dermatologists conducted in-person assessments  
31  
32 274 compared to non-specialists. This finding suggests that teledermatology may be more beneficial  
33  
34 275 in supplementing primary care than specialist care, as lower concordance with non-specialists  
35  
36 276 indicates reduced reference test accuracy. Although we did not directly assess the impact of  
37  
38 277 consulting teledermatologists on non-specialist accuracy, the included studies report high levels of  
39  
40 278 non-specialist satisfaction with the teleconsultation process. In fact, 96% of non-specialists agreed  
41  
42 279 that they learned about the dermatologic diagnosis, and 100% agreed that it helped patient care.(23)  
43  
44 280 These results are consistent with prior research attributing high provider satisfaction to streamlined  
45  
46 281 workflows, effective communication, and fast turnaround times in teledermatology.(2, 53)  
47  
48  
49  
50

51 282  
52  
53  
54  
55  
56  
57  
58  
59  
60

1  
2  
3 283 The study emphasizes the importance of standardized training on image acquisition in improving  
4  
5 284 agreement rates between in-person and remote care. Additionally, digital photography was linked  
6  
7  
8 285 to increased agreement rates, potentially due to enhanced image resolution and experienced staff  
9  
10 286 conducting virtual consultations using standardized procedures. This suggests a crucial need for  
11  
12 287 comprehensive training in image acquisition, highlighting the importance of equipping primary  
13  
14 288 care providers supporting telehealth delivery with high-quality cameras and the latest smartphone  
15  
16  
17 289 models.(24, 54, 55)  
18

19 290  
20  
21 291 Assessing agreement on the management plan is crucial in teledermatology as it serves as a triage  
22  
23 292 tool for distinguishing mild/benign cases from severe/malignant/uncertain cases. Ensuring  
24  
25 293 concordance in the management plan between telemedicine and face-to-face consultations is vital  
26  
27 294 for optimizing patient care. Future research should explore the consistency of treatment  
28  
29 295 recommendations and interventions between telemedicine and in-person consultations to further  
30  
31 296 enhance the evaluation of telemedicine's effectiveness in guiding appropriate patient management.  
32  
33  
34

35 297  
36  
37 298 Pathological assessment of skin lesions is the cornerstone of skin cancer diagnosis. This meta-  
38  
39 299 analysis found a 55.7% (CI 53.0% to 58.4%) agreement rate between teledermatology and  
40  
41 300 histopathology. This low agreement rate reflects all skin biopsies and specific diagnostic accuracy  
42  
43 301 rates could not be calculated by lesion type due to the small number of studies that reported this  
44  
45 302 value. Through sub-group analyses, we were able to compare cancerous and non-cancerous  
46  
47 303 lesions; slightly higher concordance was seen with skin cancers compared to studies that also  
48  
49 304 included non-suspicious lesions like dermatitis and psoriasis. However, the data was too  
50  
51 305 heterogeneous for any significant conclusions. We also looked at the use of teledermoscopy,  
52  
53  
54  
55  
56  
57  
58  
59



1  
2  
3 306 another technique that could help improve the diagnostic accuracy of teledermatology for  
4  
5 307 suspicious lesions, but no significant trends could be identified. These findings reflected the results  
6  
7  
8 308 of a 2016 systematic review on teledermatology.<sup>(6)</sup>  
9

10 309  
11  
12 310 Many teledermoscopy studies grouped statistics from lesions analyzed with and without  
13  
14 311 dermoscopy, preventing the assessment of the dermatoscope's incremental contributions without  
15  
16 312 the influence of potentially less accurate, dermatoscope-free analysis. Supporting this explanation,  
17  
18 313 the three teledermoscopy studies focused on cancer lesions demonstrated greater concordance rates  
19  
20 314 than the teledermoscopy studies targeting broader lesions. One study identified agreement rates  
21  
22 315 between teledermatology and F2F dermatology of 92.3% (24/26) and between teledermatology  
23  
24 316 and histopathology of 66.7% (17/26), both above our identified median.<sup>(45)</sup> Another study found  
25  
26 317 an agreement rate of 90% (37/41) when targeting pigmented lesions, although the rate may have  
27  
28 318 been inflated due to recall bias introduced by having the same dermatologist perform  
29  
30 319 teledermatology and F2F consults.<sup>(16)</sup> Finally, one study diagnosed keratotic lesions in sun-  
31  
32 320 exposed areas, finding a high agreement rate of 92% (915/1000).<sup>(37)</sup> However, this study also  
33  
34 321 risked bias from its experimental design, which excluded lesions with poor image quality. This  
35  
36 322 fails to recapitulate the complexities of practical teledermatology, which must contend with  
37  
38 323 potentially difficult image acquisition.  
39  
40  
41  
42  
43  
44  
45  
46

47 325 The 68.9% (CI 64.4% to 73.05%) combined agreement rate between teledermatology and F2F is  
48  
49 326 lower than the agreement rates outlined in a recent review.<sup>(56)</sup> This suggests our greater sample  
50  
51 327 size introduces more studies with poor agreement, which may better reflect the reality of adopting  
52  
53 328 teledermatology at a larger scale and signal risk from a lack of standardization.<sup>(55)</sup> Our date cut-  
54  
55  
56  
57  
58  
59

1  
2  
3 329 off of 2010 means our dataset has little overlap with existing reviews, and more heavily features  
4  
5 330 new relevant technologies like smartphone apps for image acquisition.(6, 57) The most recent  
6  
7 331 MA(57) on teledermatology limited its dataset to studies with multiple teledermatology and F2F  
8  
9 332 consults and variably choosing to filter low-frequency diagnoses from certain studies.<sup>(46)</sup>  
10  
11

12 333  
13  
14 334 We acknowledge several potential limitations. The heterogeneity of the data, though at first glance  
15  
16 335 might limit generalizability, enhances the adaptability and applicability of teledermatology across  
17  
18 336 diverse real-world contexts. Challenges exist due to the absence of stratification by study design  
19  
20 337 and a limited number of randomized controlled trials. Nevertheless, our findings emphasize the  
21  
22 338 critical importance of standardized processes for effective teledermatology, such as training in  
23  
24 339 image acquisition, reporting guidelines, and addressing privacy concerns. Our study reveals a  
25  
26 340 greater degree of heterogeneity compared to previous meta-analyses, reflecting real-world  
27  
28 341 application and clinical practice, bolstering the robustness of our conclusions. We advocate for a  
29  
30 342 nuanced interpretation when generalizing these findings across all settings, recognizing the  
31  
32 343 demographic and technological diversity in our sample as an asset. While our attempts to filter  
33  
34 344 biased studies didn't yield significant improvements to our meta-analysis model, we are mindful  
35  
36 345 of the potential risk of publication bias in our review.  
37  
38  
39  
40  
41

42 346  
43  
44 347 Furthermore, our study only included a limited number of live video conferencing studies,(11, 24,  
45  
46 348 46) and our ability to draw meaningful conclusions regarding the differences between live video  
47  
48 349 conferencing and SFTD methods is therefore limited. A recent study by Duong et al. demonstrated  
49  
50 350 that live video conferencing can significantly contribute to diagnosis in teledermatology by  
51  
52 351 improving the quality of collected information and accuracy of the patient's status evaluation.(24)  
53  
54  
55  
56  
57  
58  
59

1  
2  
3 352 The study found that videoconferencing significantly improved the diagnostic performance in  
4  
5 353 68.7% of cases. While these results are promising, further research is needed to explore the  
6  
7  
8 354 potential differences between clinical images and live video conferencing.  
9

10 355  
11  
12 356 In addition, our search was limited to published literature and may have missed relevant studies in  
13  
14 357 the grey literature and reports from low- and middle-income countries. Nonetheless, the variability  
15  
16  
17 358 across providers and settings underlines the need for a standardized framework to employ and  
18  
19 359 assess teledermatologists. Future research is needed to explore the differences between these  
20  
21 360 methods and other potential factors that may impact the efficacy of teledermatology, particularly  
22  
23  
24 361 in low- and middle-income countries. We acknowledge these limitations and encourage further  
25  
26 362 research to address these gaps in the literature.  
27

28 363  
29  
30  
31 364 Current trends suggest that teledermatology will continue to expand, there have been many recent  
32  
33 365 studies examining its accuracy without the design considerations necessary to allow comparisons  
34  
35 366 beyond siloed investigations.(1) The implementation of evidence-informed processes is critical to  
36  
37  
38 367 the success of teledermatology services, and the accurate assessment of teledermatology will be  
39  
40 368 required to assess which contexts it should be employed in, e.g., suspected malignancy vs.  
41  
42 369 erythema.  
43

44 370  
45  
46  
47 371 While acknowledging the significant potential of artificial intelligence (AI) in enhancing  
48  
49 372 teledermatology, particularly in areas like image recognition and diagnosis, it is crucial to note that  
50  
51 373 our current study does not incorporate these aspects. The impact of AI on teledermatology, while  
52  
53  
54  
55  
56  
57  
58  
59  
60

1  
2  
3 374 promising, introduces an additional layer of complexity, necessitating a dedicated, separate  
4  
5 375 investigation beyond the scope of our current study.  
6  
7

8 376  
9  
10 377 The factors targeted by our sub-analysis are undoubtedly important to standardize with best  
11  
12 378 practices requiring the inclusion of primary care provider training in image acquisition, explicitly  
13  
14 379 outlined conditions where dermatoscope attachments are required, and standardized reporting with  
15  
16 380 a lesion's anatomical site, size, distribution, morphology, and colour. Additional guidelines for  
17  
18 381 data reporting could be designed with a mind to future research goals, e.g., the inclusion of  
19  
20 382 Fitzpatrick grading to identify gaps in medical care. Finally, both clinical and research guidelines  
21  
22 383 must address privacy concerns, as integrating EMR and sharing of patient images or videos  
23  
24 384 presents potential vulnerabilities.  
25  
26  
27  
28  
29  
30  
31  
32  
33  
34  
35  
36  
37  
38  
39  
40  
41  
42  
43  
44  
45  
46  
47  
48  
49  
50  
51  
52  
53  
54  
55  
56  
57  
58  
59  
60

1  
2  
3 385 **Conclusion:**  
4

5 386 This meta-analysis indicates that diagnostic agreement between remote and in-person  
6  
7 387 dermatologists is acceptable in select conditions (i.e., when training for image acquisition is  
8  
9 388 provided and technologies for high-quality images are used). Telemedicine adoption rates are  
10  
11 389 accelerating globally, and teledermatology must be considered for enhanced accessibility,  
12  
13 390 flexibility, reduced costs, and safer environments it can provide patients.  
14  
15

16  
17 391 The results of this meta-analysis represent significant evidence to indicate the suitability of  
18  
19 392 teledermatology for remote care, particularly as a complement to primary care, where it can serve  
20  
21 393 as an intermediate step before F2F specialist consultations. Furthermore, the categorization of  
22  
23 394 diagnostic concordance highlights important factors to further improve diagnostic accuracy.  
24  
25 395 Additionally, it highlights the lack of standardization in teledermatology studies, calling for greater  
26  
27 396 structure in clinical practice and conducting primary research.  
28  
29  
30

31 397

32  
33 398 **Acknowledgements:**  
34

35 399 The authors would like to acknowledge Heba Tallah Mohammed affiliated with Swift Medical for  
36  
37 400 reviewing the manuscript and adding their valuable insight. The search strategies were developed  
38  
39 401 with Abdul Kareem Pullattayil (AKP), a health science librarian at Bracken Health Sciences  
40  
41 402 Library Botterell Hall at Queen's University.  
42  
43  
44

45 403

46  
47 404 **Author Contributions:**  
48

49 405 JLRG is the guarantor of the review and supervised study design. JLRG also contributed to data  
50  
51 406 analysis and provided statistical expertise. AB and NB oversaw study design, data collection,  
52  
53 407 data analysis, and original draft preparation. AB designed the search strategy with the guidance  
54  
55  
56  
57  
58  
59

1  
2  
3 408 of the medical librarian, AKP. AB, NB, MB, and MM participated in the abstract and full-text  
4  
5 409 screen, data extraction, and risk of bias assessment. RDJF, AL, and SCW contributed to the draft  
6  
7 410 review and editing. All authors read, provided feedback and approved the final manuscript.  
8  
9

10 411

11  
12 412 **Funding:**

13  
14 413 This work was supported by the Digital Technology Supercluster as part of the Telewound Care  
15  
16 414 Canada project. The funder was not involved in the design or analysis of this study.  
17  
18

19 415

20  
21 416 **Competing interests:**

22  
23 417 RDJF is an employee, and SCW is a co-founder, chief medical officer, and shareholder of Swift  
24  
25 418 Medical. JRGL and AL were formerly employees of Swift. No funding bodies have any role in  
26  
27 419 study design, data collection and analysis, decision to publish, or preparation of the manuscript.  
28  
29 420 All other authors declare no conflict of interest.  
30  
31

32 421

33  
34 422 **Data availability statement:**

35  
36 423 Data are available in a public, open access repository. All data relevant to the study are included  
37  
38 424 in the article, uploaded as supplementary information, or deposited on Open Science Framework:  
39  
40 425 <https://osf.io/fjdvg>. Data are available under the terms of the Creative Commons Zero “No rights  
41  
42 426 reserved” data waiver (CC0 1.0 Public domain dedication). Our systematic review produced a  
43  
44 427 large amount of information, and the arising database is available for future collaboration on  
45  
46 428 additional analyses. Please contact the corresponding author with any inquiries.  
47  
48

49 429

50  
51 430 **Patient consent for publication:**

1  
2  
3  
4  
5  
6  
7  
8  
9  
10  
11  
12  
13  
14  
15  
16  
17  
18  
19  
20  
21  
22  
23  
24  
25  
26  
27  
28  
29  
30  
31  
32  
33  
34  
35  
36  
37  
38  
39  
40  
41  
42  
43  
44  
45  
46  
47  
48  
49  
50  
51  
52  
53  
54  
55  
56  
57  
58  
59  
60

431 Not required.

432

433 **Ethics and dissemination**

434 Ethics approval is not applicable for this study since no original data will be collected.

435

436 **Abstract word count: 230 words; Manuscript word count: 3389 words**

For peer review only



437 **References**

- 438 1. Mohammed HT, Hyseni L, Bui V, et al. Exploring the use and challenges of  
439 implementing virtual visits during COVID-19 in primary care and lessons for sustained use.  
440 PLoS One. 2021;16(6):e0253665.
- 441 2. Armstrong AW, Chambers CJ, Maverakis E, et al. Effectiveness of Online vs In-Person  
442 Care for Adults With Psoriasis: A Randomized Clinical Trial. JAMA Network Open.  
443 2018;1(6):e183062-e.
- 444 3. Wang RH, Barbieri JS, Nguyen HP, et al. Clinical effectiveness and cost-effectiveness of  
445 teledermatology: Where are we now, and what are the barriers to adoption? Journal of the  
446 American Academy of Dermatology. 2020;83(1):299-307.
- 447 4. Okita AL, Molina Tinoco LJ, Criado PR, et al. Use of Smartphones in Telemedicine:  
448 Comparative Study Between Standard and Teledermatological Evaluation of High-Complex  
449 Care Hospital Inpatients. Telemedicine journal and e-health : the official journal of the American  
450 Telemedicine Association. 2016;22(9):755-60.
- 451 5. Saleh N, Abdel Hay R, Hegazy R, et al. Can teledermatology be a useful diagnostic tool  
452 in dermatology practice in remote areas? An Egyptian experience with 600 patients. Journal of  
453 telemedicine and telecare. 2017;23(2):233-8.
- 454 6. Finnane A, Dallest K, Janda M, et al. Teledermatology for the Diagnosis and  
455 Management of Skin Cancer: A Systematic Review. JAMA Dermatol. 2017;153(3):319-27.
- 456 7. Moher D, Shamseer L, Clarke M, et al. Preferred reporting items for systematic review  
457 and meta-analysis protocols (PRISMA-P) 2015 statement. Syst Rev. 2015;4(1):1.
- 458 8. Brewer AC, Endly DC, Henley J, et al. Mobile applications in dermatology. JAMA  
459 Dermatol. 2013;149(11):1300-4.
- 460 9. Rios-Yuil JM. [Correlation between face-to-face assessment and telemedicine for the  
461 diagnosis of skin disease in case conferences]. Actas dermo-sifiliograficas. 2012;103(2):138-43.
- 462 10. Romero Aguilera G, Cortina De La Calle P, Vera Iglesias E, et al. Interobserver  
463 reliability of store-and-forward teledermatology in a clinical practice setting. Actas Dermo-  
464 Sifiliograficas. 2014;105(6):605-13.
- 465 11. Romero G, Sanchez P, Garcia M, et al. Randomized controlled trial comparing store-and-  
466 forward teledermatology alone and in combination with web-camera videoconferencing. Clinical  
467 and Experimental Dermatology. 2010;35(3):311-7.
- 468 12. Sterne JAC, Savović J, Page MJ, et al. RoB 2: a revised tool for assessing risk of bias in  
469 randomised trials. BMJ. 2019;366:14898.
- 470 13. Altieri L, Hu J, Nguyen A, et al. Interobserver reliability of teledermatology across all  
471 Fitzpatrick skin types. Journal of telemedicine and telecare. 2017;23(1):68-73.
- 472 14. Castelo-Soccio L, Kovarik CL, Azfar RS, et al. Reliability and validity of mobile  
473 teledermatology in human immunodeficiency virus-positive patients in botswana a pilot study.  
474 JAMA Dermatology. 2014;150(6):601-7.
- 475 15. Barbieri JS, Nelson CA, James WD, et al. The reliability of teledermatology to triage  
476 inpatient dermatology consultations. JAMA Dermatology. 2014;150(4):419-24.
- 477 16. Barcaui CB, Lima PMO. Application of teledermoscopy in the diagnosis of pigmented  
478 lesions. International Journal of Telemedicine and Applications. 2018;2018((Barcaui) Adjunct  
479 Professor of Dermatology, Faculty of Medical Sciences, State University of Rio de Janeiro, PhD  
480 in Medicine (Dermatology), University of Sao Paulo, Dermatology Department, Pedro Ernesto  
481 University Hospital, Rio de Janeiro State University):1624073.

17. Batalla A, Suh-Oh HJ, Abalde T, et al. Teledermatology in Paediatrics. Observations in daily clinical practice. *Anales de pediatria (Barcelona, Spain)*. 2003;84(6):324-30.
18. Borve A, Holst A, Gente-Lidholm A, et al. Use of the mobile phone multimedia messaging service for teledermatology. *Journal of Telemedicine and Telecare*. 2012;18(5):292-6.
19. Borve A, Terstappen K, Sandberg C, et al. Mobile teledermoscopy-there's an app for that! *Dermatology practical & conceptual*. 2013;3(2):41-8.
20. Carter ZA, Li X, Goldman S, et al. Creation of an internal teledermatology store-and-forward system in an existing electronic health record: A pilot study in a safety-net public health and hospital system. *JAMA Dermatology*. 2017;153(7):644-50.
21. Chen TS, Goldyne ME, Mathes EFD, et al. Pediatric teledermatology: Observations based on 429 consults. *Journal of the American Academy of Dermatology*. 2010;62(1):61-6.
22. Clarke EL, Reichenberg JS, Ahmed AM, et al. The utility of teledermatology in the evaluation of skin lesions. *Journal of telemedicine and telecare*. 2021(9506702, cpj):1357633X20987423.
23. Costello CM, Cumsy HJL, Maly CJ, et al. Improving Access to Care Through the Establishment of a Local, Teledermatology Network. *Telemedicine journal and e-health : the official journal of the American Telemedicine Association*. 2020;26(7):935-40.
24. Duong TA, Cordoliani F, Julliard C, et al. Emergency department diagnosis and management of skin diseases with real-time teledermatologic expertise. *JAMA Dermatology*. 2014;150(7):743-7.
25. Gabel CK, Nguyen E, Karmouta R, et al. Use of teledermatology by dermatology hospitalists is effective in the diagnosis and management of inpatient disease. *Journal of the American Academy of Dermatology*. 2021;84(6):1547-53.
26. Gatica JL, Bertolo S, Morales E, et al. Store-and-forward teledermatology in Chile: A contribution to primary health care. *Piel*. 2015;30(3):148-54.
27. Gerhardt CA, Foels R, Grewe S, et al. Assessing the Diagnostic Accuracy of Teledermatology Consultations at a Local Veterans Affairs Dermatology Clinic. *Cureus*. 2021;13(6):e15406.
28. Giavina-Bianchi M, Azevedo MFD, Sousa RM, et al. Part II: Accuracy of Teledermatology in Skin Neoplasms. *Frontiers in medicine*. 2020;7(101648047):598903.
29. Giavina-Bianchi M, Sousa R, Cordioli E. Part I: Accuracy of Teledermatology in Inflammatory Dermatoses. *Frontiers in medicine*. 2020;7(101648047):585792.
30. Keller JJ, Johnson JP, Latour E. Inpatient teledermatology: Diagnostic and therapeutic concordance among a hospitalist, dermatologist, and teledermatologist using store-and-forward teledermatology. *Journal of the American Academy of Dermatology*. 2020;82(5):1262-7.
31. Lamel SA, Haldeman KM, Ely H, et al. Application of mobile teledermatology for skin cancer screening. *Journal of the American Academy of Dermatology*. 2012;67(4):576-81.
32. Muir J, Xu C, Singh P, et al. Incorporating teledermatology into emergency medicine. *EMA - Emergency Medicine Australasia*. 2011;23(5):562-8.
33. Nami N, Rubegni P, Fimiani M, et al. Concordance and Time Estimation of Store-and-Forward Mobile Teledermatology Compared to Classical Face-to-Face Consultation. *Acta Dermato-Venereologica*. 2015;95(1):35-9.
34. Patro BK, Tripathy JP, De D, et al. Diagnostic agreement between a primary care physician and a teledermatologist for common dermatological conditions in North India. *Indian dermatology online journal*. 2015;6(1):21-6.

- 1  
2  
3 527 35. Ribas J, Schettini APM, Ribas CBDR, et al. Agreement between dermatological  
4 528 diagnoses made by live examination compared to analysis of digital images. *Anais Brasileiros de*  
5 529 *Dermatologia*. 2010;85(4):441-7.
- 6 530 36. Rubegni P, Nami N, Poggiali S, et al. Geriatric teledermatology: Store-and-forward vs.  
7 531 face-to-face examination. *Journal of the European Academy of Dermatology and Venereology*.  
8 532 2011;25(11):1334-9.
- 9 533 37. Sola-Ortigosa J, Munoz-Santos C, Masat-Tico T, et al. The Role of Teledermatology and  
10 534 Teledermoscopy in the Diagnosis of Actinic Keratosis and Field Cancerization. *The Journal of*  
11 535 *investigative dermatology*. 2020;140(10):1976-84.e4.
- 12 536 38. Tan E, Yung A, Oakley A, et al. Successful triage of patients referred to a skin lesion  
13 537 clinic using teledermoscopy (IMAGE IT trial). *British Journal of Dermatology*.  
14 538 2010;162(4):803-11.
- 15 539 39. Tran K, Ayad M, Monir S, et al. Mobile teledermatology in the developing world:  
16 540 Implications of a feasibility study on 30 Egyptian patients with common skin diseases. *Journal of*  
17 541 *the American Academy of Dermatology*. 2011;64(2):302-9.
- 18 542 40. Vano-Galvan S, Aguayo-Leiva I, Rios-Buceta L, et al. Store-and-forward  
19 543 teledermatology: Assessment of validity in a series of 2000 observations. *Actas Dermo-*  
20 544 *Sifiliograficas*. 2011;102(4):277-83.
- 21 545 41. Vestergaard T, Prasad SC, Schuster A, et al. Diagnostic accuracy and interobserver  
22 546 concordance: teledermoscopy of 600 suspicious skin lesions in Southern Denmark. *Journal of the*  
23 547 *European Academy of Dermatology and Venereology : JEADV*. 2020;34(7):1601-8.
- 24 548 42. Gravely AA, Warshaw EM, Nelson DB. Reliability of store and forward teledermatology  
25 549 for skin neoplasms. *Journal of the American Academy of Dermatology*. 2015;72(3):426-35.
- 26 550 43. Zanini M. Analyze of diagnostic concordance between face-to-face and teledermatology  
27 551 diagnosis. *Medicina Cutanea Ibero-Latino-Americana*. 2013;41(2):60-2.
- 28 552 44. Zink A, Kolbinger A, Leibl M, et al. The value of teledermatology using a mobile app  
29 553 compared to conventional dermatology. *European Journal of Dermatology*. 2017;27(4):429-31.
- 30 554 45. Zink A, Kolbinger A, Leibl M, et al. Teledermoscopy by mobile phones: Reliable help in  
31 555 the diagnosis of skin lesions? *Hautarzt*. 2017;68(11):890-5.
- 32 556 46. Marchell R, Locatis C, Liu W-L, et al. Comparing High Definition Live Interactive and  
33 557 Store-and-Forward Consultations to In-Person Examinations. *Telemedicine journal and e-health :*  
34 558 *the official journal of the American Telemedicine Association*. 2017;23(3):213-8.
- 35 559 47. Jones L, Jameson M, Oakley A. Remote Skin Cancer Diagnosis: Adding Images to  
36 560 Electronic Referrals Is More Efficient Than Wait-Listing for a Nurse-Led Imaging Clinic.  
37 561 *Cancers (Basel)*. 2021;13(22).
- 38 562 48. Gonzalez Coloma F, Sandoval Garces M, Gedda Quiroga V, et al. Teledermatology in  
39 563 Remote Parts of Chile: Experience in 4 Isolated Rural Areas. *Actas dermo-sifiliograficas*.  
40 564 2019;110(8):653-8.
- 41 565 49. Goulart Silveira CE, Carcano C, Mauad EC, et al. Call phone usefulness to improve the  
42 566 skin cancer screening: preliminary results and critical analysis of mobile app development. *Rural*  
43 567 *& Remote Health*. 2019;19(1):1-7.
- 44 568 50. Piccoli MF, Amorim BDB, Wagner HM, et al. Teledermatology protocol for screening of  
45 569 Skin cancer. *Anais Brasileiros de Dermatologia*. 2015;90(2):202-10.
- 46 570 51. Senel E, Baba M, Durdu M. The contribution of teledermatoscopy to the diagnosis and  
47 571 management of non-melanocytic skin tumours. *Journal of Telemedicine and Telecare*.  
48 572 2013;19(1):60-3.

- 1  
2  
3 573 52. Gravely AA, Nelson DB, Warshaw EM. Accuracy of teledermatology/teledermoscopy  
4 574 and clinic-based dermatology for specific categories of skin neoplasms. *Journal of the American*  
5 575 *Academy of Dermatology*. 2010;63(2):348-52.  
6 576 53. McFarland LV, Raugi GJ, Reiber GE. Primary care provider and imaging technician  
7 577 satisfaction with a teledermatology project in rural Veterans Health Administration clinics.  
8 578 *Telemed J E Health*. 2013;19(11):815-25.  
9 579 54. Massone C, Javor S, Amato I, et al. Training of primary care physicians enhances  
10 580 performance of mobile teledermatology. *Anais brasileiros de dermatologia*. 2021;96(4):514-6.  
11 581 55. Finnane A, Curiel-Lewandrowski C, Wimberley G, et al. Proposed Technical Guidelines  
12 582 for the Acquisition of Clinical Images of Skin-Related Conditions. *JAMA Dermatol*.  
13 583 2017;153(5):453-7.  
14 584 56. Lee JJ, English JC, 3rd. Teledermatology: A Review and Update. *Am J Clin Dermatol*.  
15 585 2018;19(2):253-60.  
16 586 57. Bastola M, Locatis C, Fontelo P. Diagnostic Reliability of In-Person Versus Remote  
17 587 Dermatology: A Meta-Analysis. *Telemed J E Health*. 2021;27(3):247-50.  
18  
19  
20  
21  
22 589

1  
2  
3 590 **Figure Legends**  
4

5 591 **Figure 1. PRISMA Flow diagram of study selection.**  
6  
7 592  
8 593

9 594 **Figure 2. Forest plot representing F2F and teledermatology primary diagnostic agreement by whether imaging acquisition training was indicated by the study.**

10 595  
11 596 Forest plot representing F2F and teledermatology primary diagnostic agreement when image  
12 597 acquisition training is involved. Studies were sorted into two groups, a) Did not conduct or did not  
13 598 report training personnel on image acquisition; b) Stated that person in charge of image acquisition  
14 599 was trained. **(Left)** Forest plot representing percentage agreement and 95% C.I. for overall  
15 600 concordance across 40 studies with a total of 72 unique number of comparisons, N of events and total  
16 601 included participants. **(Right)** Forest plot representing kappa concordance and 95% C.I. for overall  
17 602 concordance across 21 studies with a total of 45 unique number of comparisons, N of total included  
18 603 participants. Abbreviations: F2F (Face-to-Face), PCP (Primary Care Provider), TD (Teledermatology  
19 604 or Teledermatologist).  
20 605  
21 606

22 607 **Figure 3. Forest plot representing F2F and teledermatology primary diagnostic agreement by device type used to capture clinical photographs.**

23 608  
24 609 Forest plot representing F2F and teledermatology primary diagnostic agreement by imaging  
25 610 technology used. Studies were sorted into three groups, i) Digital photography ii) Imaging technology  
26 611 not mentioned iii) Smartphone or tablet. **(Left)** Forest plot representing percentage agreement and  
27 612 95% C.I. for overall concordance across 40 studies with a total of 72 unique number of comparisons,  
28 613 N of events and total included participants. **(Right)** Forest plot representing kappa concordance and  
29 614 95% C.I. for overall concordance across 21 studies with a total of 45 unique number of comparisons,  
30 615 N of total included participants. Abbreviations: F2F (Face-to-Face), PCP (Primary Care Provider), TD  
31 616 (Teledermatology or Teledermatologist)  
32  
33  
34  
35  
36  
37  
38  
39  
40  
41  
42  
43  
44  
45  
46  
47  
48  
49  
50  
51  
52  
53  
54  
55  
56  
57  
58  
59  
60

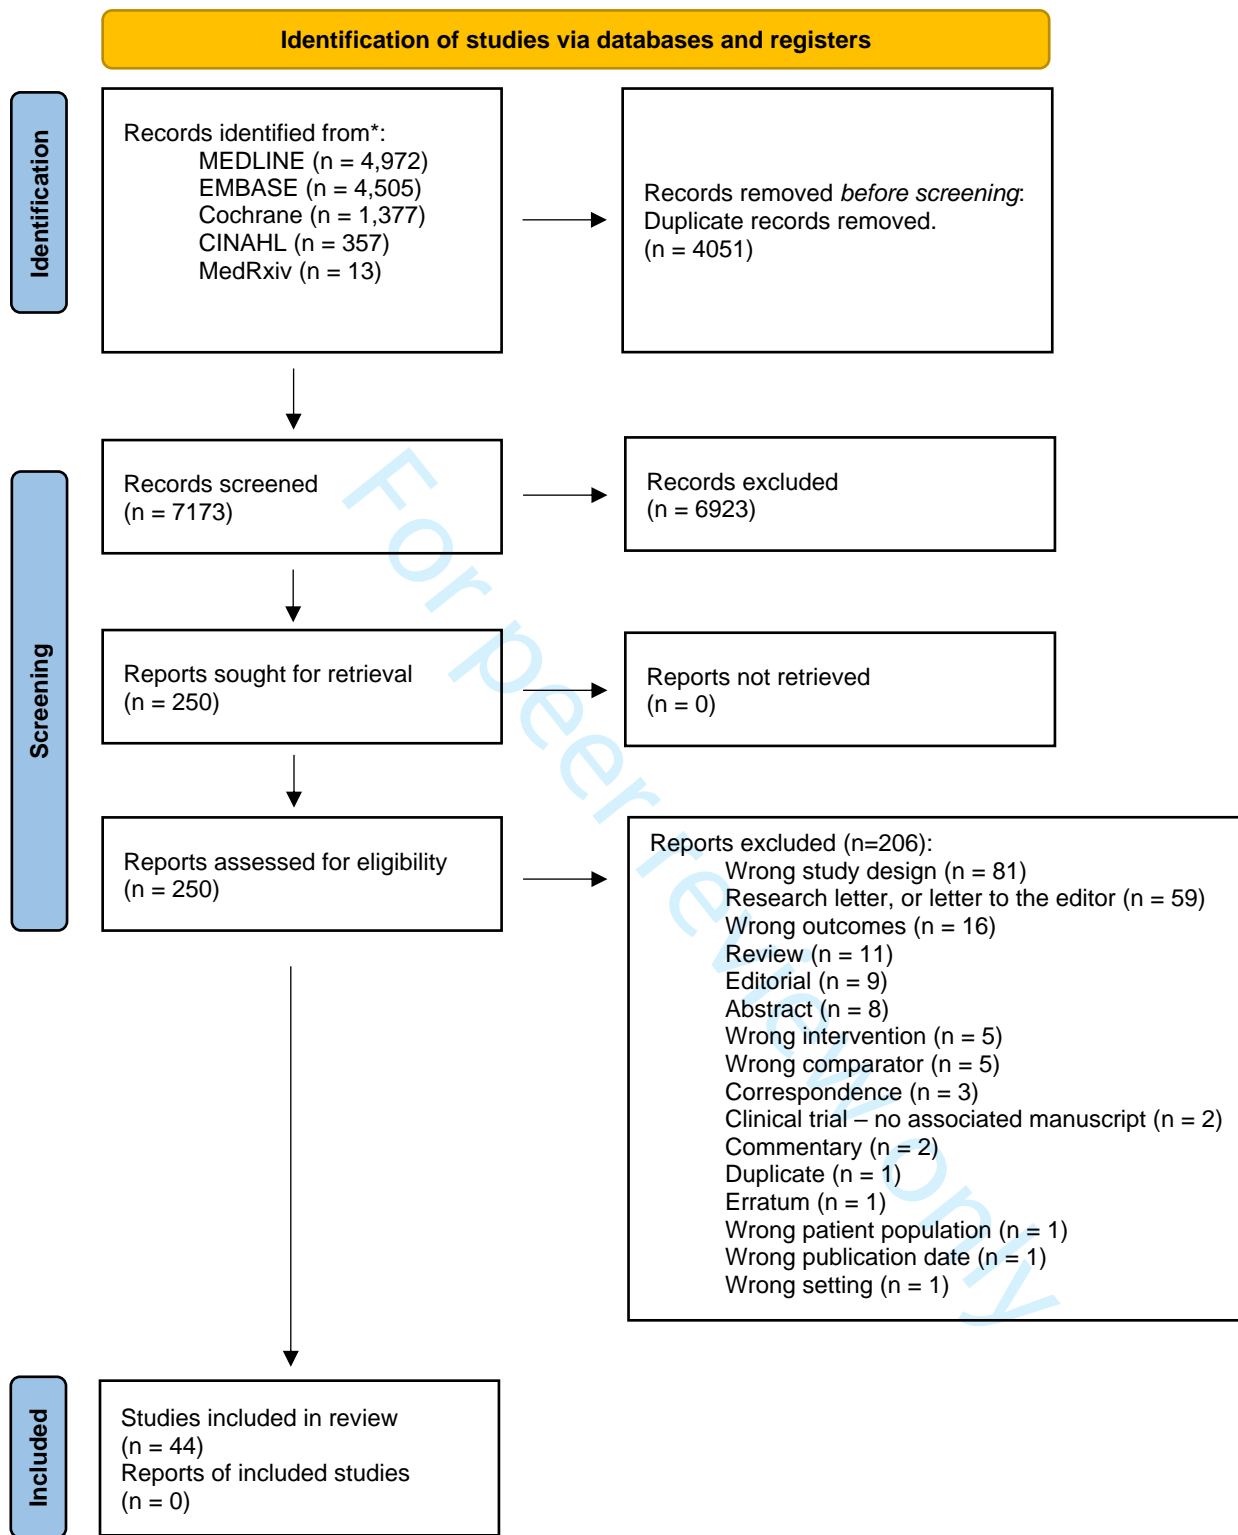

Figure 1. PRISMA Flow diagram of study selection.



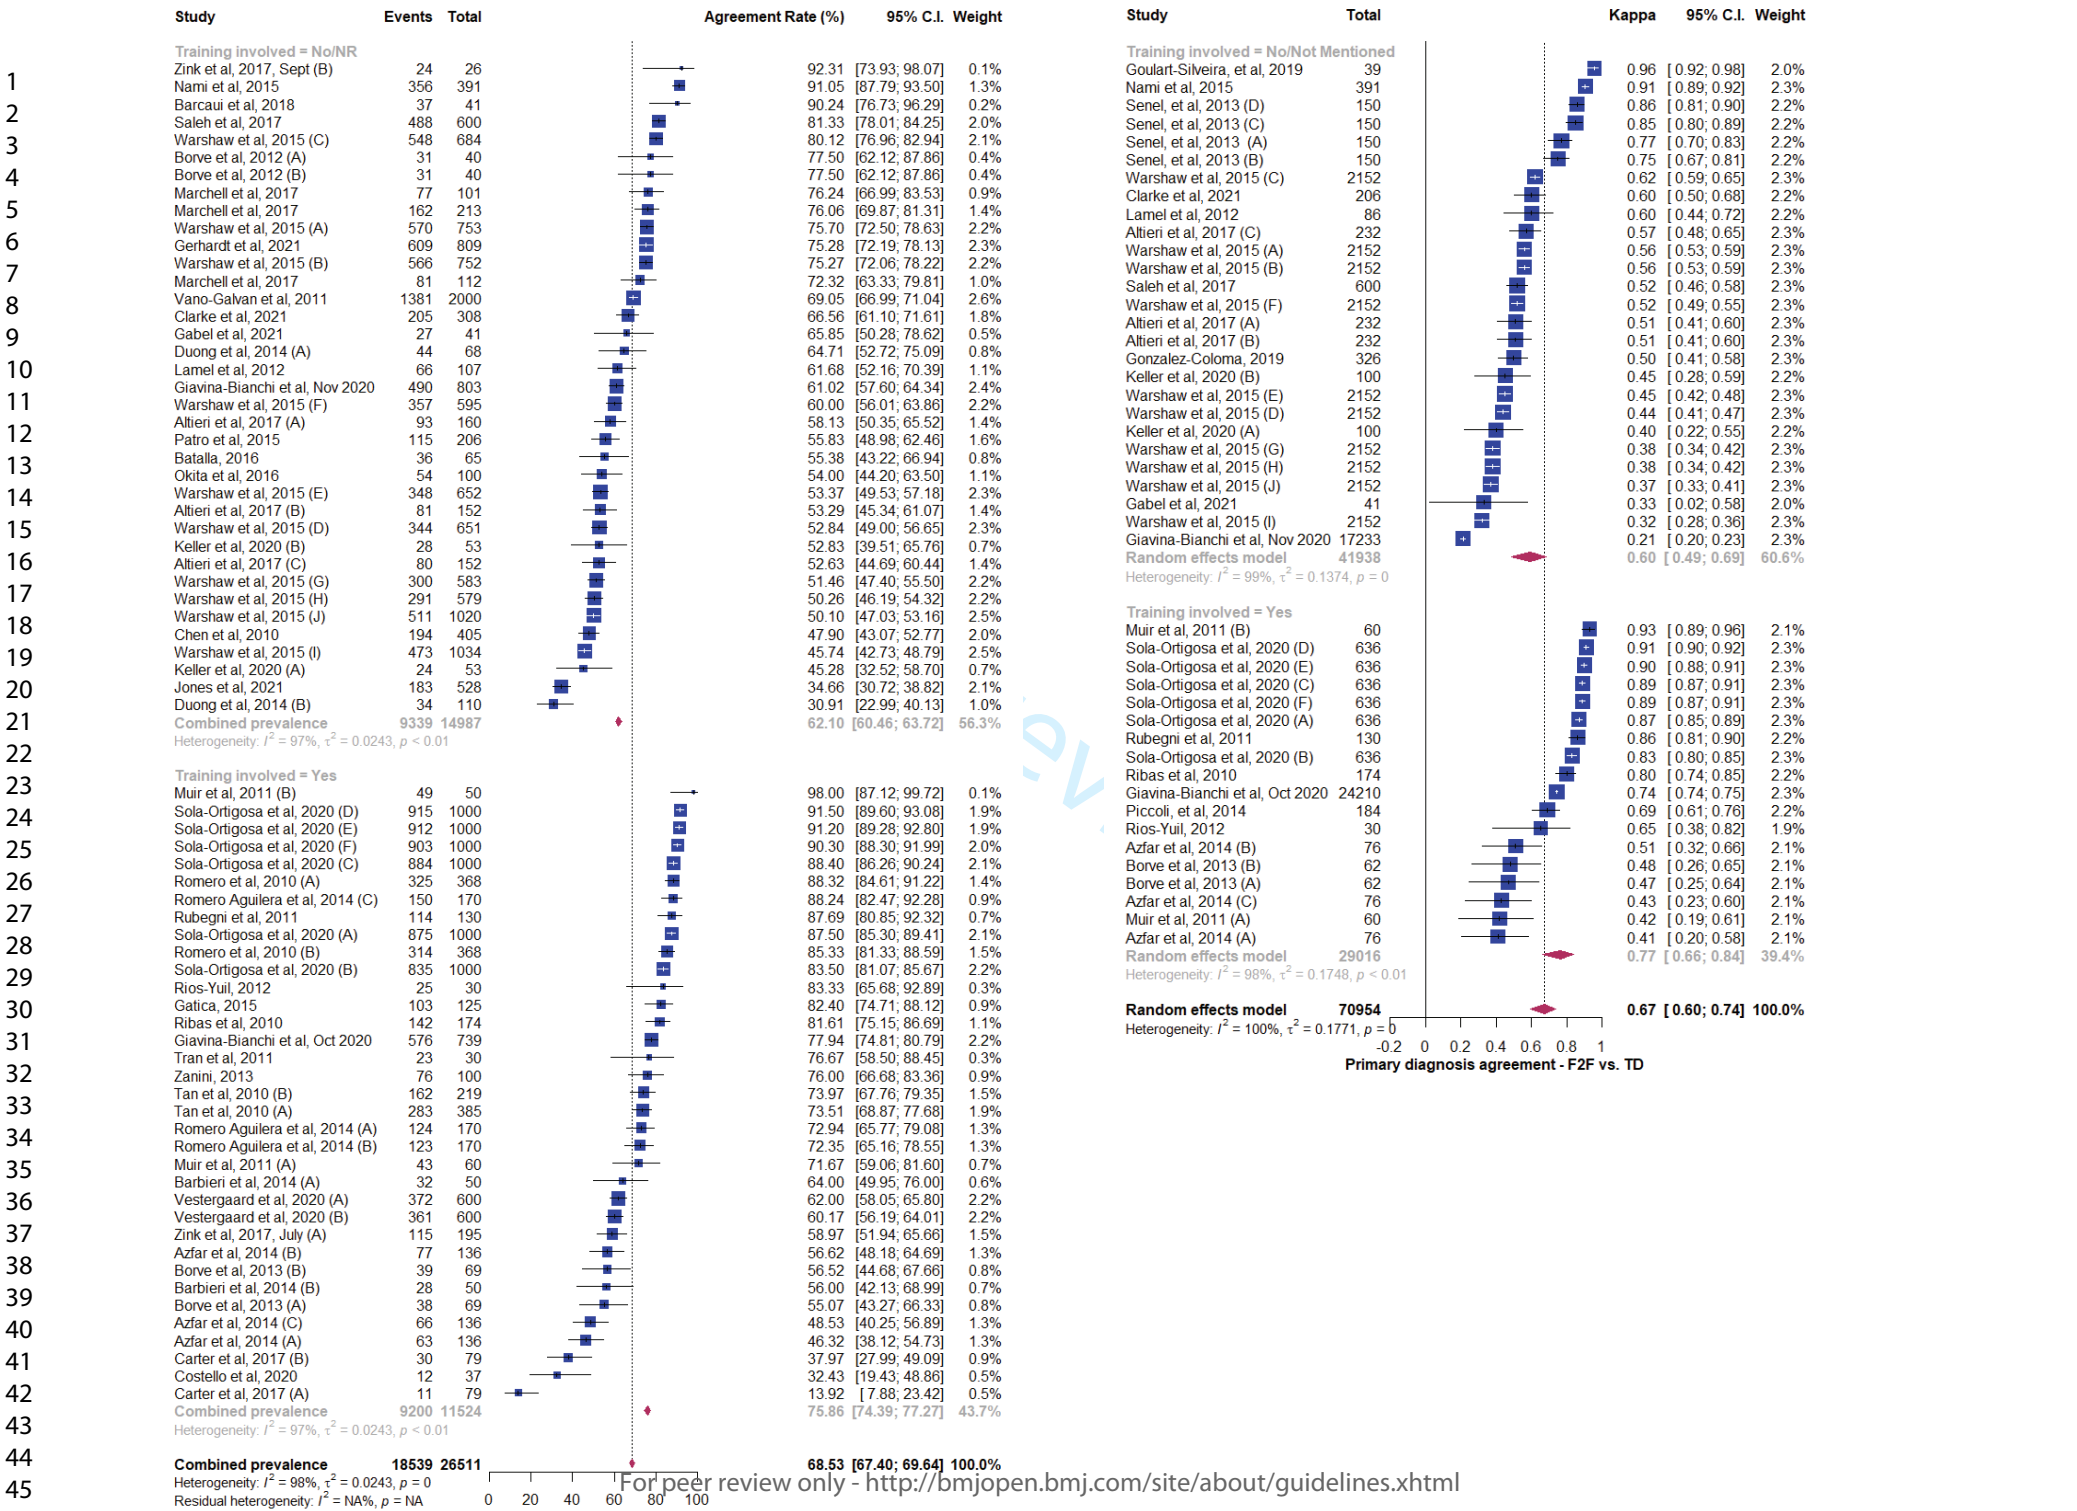





For peer review only - <http://bmjopen.bmj.com/site/about/guidelines.xhtml>

## Supplementary Online Content

**Title:** Diagnostic Reliability in Teledermatology: A Systematic Review and Meta-Analysis

### Authors

Adrienn N. Bourkas\*<sup>1</sup> (MSc), Natasha Barone\*<sup>2</sup> (MD, MSc), Matthew E.C. Bourkas<sup>3</sup> (PhD), Matthew Mannarino<sup>4</sup> (PhD), Robert D. J. Fraser<sup>5,6</sup> (RN, MN), Amy Lorincz (MSc), Sheila C. Wang<sup>5,7</sup> (MD, PhD), Jose L. Ramirez-GarciaLuna<sup>4</sup> (MD, PhD)

\* Authors contributed equally

### Affiliations

<sup>1</sup>Faculty of Health Sciences, Queen's University School of Medicine, Kingston, Ontario, Canada

<sup>2</sup>Faculty of Medicine and Health Sciences, McGill University, Montreal, Quebec, Canada

<sup>3</sup>Temerty Faculty of Medicine, Department of Biochemistry, University of Toronto, Toronto, Ontario, Canada

<sup>4</sup>Department of Surgery, McGill University, Montreal, Quebec, Canada

<sup>5</sup>Swift Medical Inc., Toronto, Ontario, Canada

<sup>6</sup>Arthur Labatt Family School of Nursing, Western University, London, Ontario Canada

<sup>7</sup>Department of Medicine, Division of Dermatology, McGill University Health Centre, Montreal, Quebec, Canada

## Supplementary eMethods

### Search Strategy

The search strategy was written for Ovid Medline and translated using each database's syntax, controlled vocabulary, and search fields. MeSH terms, Emtree terms, and free text words were used for teledermatology and skin conditions such as melanoma and related synonyms. To identify additional articles not captured through the aforementioned search, a manual search was conducted via reference search of the included studies.

All database records were downloaded to EndNote X9 (Clarivate) and uploaded to web-based software for deduplication, screening, and full-text evaluation (Covidence; Veritas Health Innovation). We contacted three study authors to gain access to their published work.(1, 2, 3) The search strategy is available below.

### Ovid MEDLINE Search

Ovid MEDLINE(R) and Epub Ahead of Print, In-Process, In-Data-Review & Other Non-Indexed Citations and Daily <1946 to 2022 May 02>

|    |                                           |        |
|----|-------------------------------------------|--------|
| 1  | e consult*.mp.                            | 322    |
| 2  | econsult*.mp.                             | 218    |
| 3  | electronic consult*.mp.                   | 366    |
| 4  | e health.mp.                              | 4095   |
| 5  | ehealth.mp.                               | 6823   |
| 6  | e visit*.mp.                              | 88     |
| 7  | evisit*.mp.                               | 26     |
| 8  | home video visit*.mp.                     | 4      |
| 9  | internet/ or internet-based intervention/ | 82046  |
| 10 | internet.mp.                              | 128675 |
| 11 | offsite care.mp.                          | 4      |
| 12 | off site care.mp.                         | 9      |
| 13 | ontario telemedicine network.mp.          | 19     |
| 14 | Remote Consultation/                      | 5689   |
| 15 | remote consultation*.mp.                  | 6406   |
| 16 | remote visit*.mp.                         | 95     |
| 17 | tele care.mp.                             | 40     |
| 18 | telecare.mp.                              | 945    |
| 19 | tele consult*.mp.                         | 208    |
| 20 | teleconsult*.mp.                          | 2208   |
| 21 | tele diagnos*.mp.                         | 46     |
| 22 | telehealth.mp.                            | 13222  |
| 23 | tele health.mp.                           | 287    |
| 24 | telemedicine/                             | 36763  |
| 25 | telemedicine.mp.                          | 47751  |
| 26 | tele medicine.mp.                         | 197    |
| 27 | telemonitor*.mp.                          | 2380   |
| 28 | tele monitor*.mp.                         | 209    |
| 29 | Telepathology/                            | 918    |
| 30 | telepatholog*.mp.                         | 1223   |
| 31 | tele patholog*.mp.                        | 25     |
| 32 | telepractice*.mp.                         | 276    |
| 33 | tele practice*.mp.                        | 16     |
| 34 | Therapy, Computer-Assisted/               | 6969   |
| 35 | video consult*.mp.                        | 827    |
| 36 | videoconsult*.mp.                         | 41     |
| 37 | virtual care.mp.                          | 1177   |
| 38 | web based.mp.                             | 42402  |
| 39 | Telepathology/                            | 918    |

1  
2  
3 77 40 or/1-39 216985  
4 78 41 Dermatology/21077  
5 79 42 dermatolog\*.mp. 110593  
6 80 43 dermatopatholog\*.mp. 2990  
7 81 44 exp Skin Diseases/di [Diagnosis] 196739  
8 82 45 exp Skin Neoplasms/ 142454  
9 83 46 skin.mp. 880457  
10 84 47 exp Skin Abnormalities/ 34228  
11 85 48 burns/ or burns, chemical/ or burns, electric/ or sunburn/ 59533  
12 86 49 burn\*.mp. 141877  
13 87 50 wound healing/ or cicatrix/ 127484  
14 88 51 wound\*.mp. 446154  
15 89 52 or/41-51 1580012  
16 90 53 40 and 52 7160  
17 91 54 teledermatolog\*.mp. 1273  
18 92 55 tele dermatolog\*.mp. 35  
19 93 56 54 or 55 1298  
20 94 57 53 or 56 7448  
21 95 58 limit 57 to dt=20100101-20220501 [January 1st, 2010 to May 1st, 2022] 4972  
22 96  
23 97

### Embase Search

24 99 Embase Classic+Embase <1947 to 2021 July 15>  
25 100 1 computer assisted therapy/ 4772  
26 101 2 e consult\*.mp. 411  
27 102 3 econsult\*.mp. 283  
28 103 4 electronic consult\*.mp. 461  
29 104 5 e health.mp. 4440  
30 105 6 ehealth.mp. 5099  
31 106 7 e visit\*.mp. 83  
32 107 8 evisit\*.mp. 30  
33 108 9 home video visit\*.mp. 10  
34 109 10 internet/ or web-based intervention/ 114861  
35 110 11 internet.mp. 143810  
36 111 12 offsite care.mp. 5  
37 112 13 off site care.mp. 12  
38 113 14 ontario telemedicine network.mp. 36  
39 114 15 remote consultation\*.mp. 808  
40 115 16 remote visit\*.mp. 79  
41 116 17 tele care.mp. 55  
42 117 18 telecare.mp. 983  
43 118 19 teleconsultation/ 11686  
44 119 20 tele consult\*.mp. 243  
45 120 21 teleconsult\*.mp. 12352  
46 121 22 tele diagnos\*.mp. 53  
47 122 23 telehealth.mp. 15276  
48 123 24 tele health.mp. 389  
49 124 25 telemedicine/ 31867  
50 125 26 telemedicine.mp. 38951  
51 126 27 tele medicine.mp. 333  
52 127 28 telemonitor\*.mp. 4838  
53 128 29 tele monitor\*.mp. 344  
54 129 30 Telepathology/ 869  
55 130 31 telepatholog\*.mp. 1265  
56 131 32 tele patholog\*.mp. 41  
57 132 33 telepractice\*.mp. 162

1  
2  
3 133 34 tele practice\*.mp. 9  
4 134 35 video consult\*.mp. 751  
5 135 36 videoconsult\*.mp. 54  
6 136 37 virtual care.mp. 496  
7 137 38 web based.mp. 49157  
8 138 39 or/1-38 240118  
9 139 40 dermatology/ or cosmetic dermatology/ or pediatric dermatology/ or psychodermatology/ 51419  
10 140 41 dermatolog\*.mp. 161210  
11 141 42 dermatopatholog\*.mp. 3737  
12 142 43 burn/ or burn contracture/ or electric burn/ or face burn/ or hand burn/ or ionizing radiation burn/ or scald/ or  
13 143 sunburn/ 74890  
14 144 44 burn\*.mp. 189010  
15 145 45 exp skin disease/di [Diagnosis] 209136  
16 146 46 exp skin tumor/ 213775  
17 147 47 skin\*.mp. 1294867  
18 148 48 or/40-47 1665263  
19 149 49 39 and 48 7063  
20 150 50 teledermatology/ 1295  
21 151 51 tele dermatolog\*.mp. 42  
22 152 52 teledermatolog\*.mp. 1798  
23 153 53 50 or 51 or 52 1812  
24 154 54 49 or 53 8004  
25 155 55 limit 54 to (books or chapter or conference abstract or conference paper or "conference review") 1828  
26 156 56 54 not 55 6176  
27 157 57 limit 56 to yr="2010 -Current" 4505  
28 158

### 28 159 Cochrane Search

29 160 EBM Reviews - Cochrane Database of Systematic Reviews <2005 to July 14, 2021> EBM Reviews - ACP Journal  
30 161 Club <1991 to June 2021> EBM Reviews - Database of Abstracts of Reviews of Effects <1st Quarter 2016> EBM  
31 162 Reviews - Cochrane Clinical Answers <June 2021> EBM Reviews - Cochrane Central Register of Controlled Trials  
32 163 <June 2021> EBM Reviews - Cochrane Methodology Register <3rd Quarter 2012> EBM Reviews - Health  
33 164 Technology Assessment <4th Quarter 2016> EBM Reviews - NHS Economic Evaluation Database <1st Quarter  
34 165 2016>  
35 166 1 e consult\*.mp. 44  
36 167 2 econsult\*.mp. 22  
37 168 3 electronic consult\*.mp. 29  
38 169 4 e health.mp. 617  
39 170 5 ehealth.mp. 766  
40 171 6 e visit\*.mp. 14  
41 172 7 evisit\*.mp. 1  
42 173 8 home video visit\*.mp. 3  
43 174 9 internet/ or internet-based intervention/ 4,275  
44 175 10 internet.mp. 15,059  
45 176 11 offsite care.mp. 2  
46 177 12 off site care.mp. 2  
47 178 13 ontario telemedicine network.mp. 7  
48 179 14 Remote Consultation/ 460  
49 180 15 remote consultation\*.mp. 551  
50 181 16 remote visit\*.mp. 17  
51 182 17 tele care.mp. 34  
52 183 18 telecare.mp. 249  
53 184 19 tele consult\*.mp. 59  
54 185 20 teleconsult\*.mp. 822  
55 186 21 tele diagnos\*.mp. 4  
56 187 22 telehealth.mp. 2,308  
57 188 23 tele health.mp. 128

|    |     |                                                               |         |
|----|-----|---------------------------------------------------------------|---------|
| 1  |     |                                                               |         |
| 2  |     |                                                               |         |
| 3  | 189 | 24 telemedicine/                                              | 2,617   |
| 4  | 190 | 25 telemedicine.mp.                                           | 4,819   |
| 5  | 191 | 26 tele medicine.mp.                                          | 57      |
| 6  | 192 | 27 telemonitor*.mp.                                           | 1,236   |
| 7  | 193 | 28 tele monitor*.mp.                                          | 115     |
| 8  | 194 | 29 Telepathology/                                             | 8       |
| 9  | 195 | 30 telepatholog*.mp.                                          | 22      |
| 10 | 196 | 31 tele patholog*.mp.                                         | 2       |
| 11 | 197 | 32 telepractice*.mp.                                          | 37      |
| 12 | 198 | 33 tele practice*.mp.                                         | 0       |
| 13 | 199 | 34 Therapy, Computer-Assisted/                                | 1,391   |
| 14 | 200 | 35 video consult*.mp.                                         | 117     |
| 15 | 201 | 36 videoconsult*.mp.                                          | 8       |
| 16 | 202 | 37 virtual care.mp.                                           | 31      |
| 17 | 203 | 38 web based.mp.                                              | 9,110   |
| 18 | 204 | 39 Telepathology/                                             | 8       |
| 19 | 205 | 40 or/1-39                                                    | 29,268  |
| 20 | 206 | 41 Dermatology/                                               | 124     |
| 21 | 207 | 42 dermatolog*.mp.                                            | 10,838  |
| 22 | 208 | 43 dermatopatholog*.mp.                                       | 80      |
| 23 | 209 | 44 exp Skin Diseases/di [Diagnosis]                           | 630     |
| 24 | 210 | 45 exp Skin Neoplasms/                                        | 1,738   |
| 25 | 211 | 46 skin.mp.                                                   | 67,534  |
| 26 | 212 | 47 exp Skin Abnormalities/                                    | 269     |
| 27 | 213 | 48 burns/ or burns, chemical/ or burns, electric/ or sunburn/ | 1,779   |
| 28 | 214 | 49 burn*.mp.                                                  | 12,780  |
| 29 | 215 | 50 wound healing/ or cicatrix/                                | 5,677   |
| 30 | 216 | 51 wound*.mp.                                                 | 35,982  |
| 31 | 217 | 52 or/41-51                                                   | 110,390 |
| 32 | 218 | 53 40 and 52                                                  | 1,622   |
| 33 | 219 | 54 teledermatolog*.mp.                                        | 149     |
| 34 | 220 | 55 tele dermatolog*.mp.                                       | 20      |
| 35 | 221 | 56 54 or 55                                                   | 151     |
| 36 | 222 | 57 53 or 56                                                   | 1,684   |
| 37 | 223 | 58 limit 57 to yr="2010 -Current"                             | 1,377   |
| 38 | 224 |                                                               |         |

**CINAHL Search**

Searched keyword teledermatology and set limit to yr="2010-Current" 357

**MedRxiv Search**

Searched keyword teledermatology and set limit to yr="2010-Current" 13

**Eligibility Criteria**

Inclusion and exclusion criteria are summarized in **eTable 2**.

**Data Selection and Extraction**

Information extracted from full-text articles is summarized in **eTable 3**.

**Data Analysis and Synthesis**

In this study, a letter was assigned to each unique study grouping as explained in **eTable 4**. For both the percentage of agreement and kappa values, forest plots, the  $I^2$  index, and the  $\tau^2$  statistic were used in combination to investigate statistical heterogeneity. To evaluate the statistical significance of differences between kappa values, we performed meta-regressions and derived corresponding p-values.



1  
2  
3 243 Cohen's kappa values for diagnostic concordance between teledermatology and F2F physicians were interpreted based  
4 244 on the following criteria.<sup>(4)</sup> Values between 0–.20 indicate no agreement, .21–.39 minimal agreement, .40–.59 weak  
5 245 agreement, .60–.79 moderate agreement, .80–.90 strong agreement, and above .90 almost perfect agreement.

6 246  
7 247 Sub-group analysis included different skin conditions, specialization of the F2F physician, whether staff were trained  
8 248 on image acquisition, the technology used for image acquisition, the use of teledermoscopy, studies conducted pre- or  
9 249 post-pandemic, and the risk of bias. Confounding factors, such as technology type, year of publication, and training  
10 250 of study raters, were controlled using meta-regression.

11 251  
12 252 Proportions meta-analysis looked at weighted averages, and 95% confidence intervals were reported. Given the unique  
13 253 properties of proportional data and the considerable heterogeneity observed, conventional publication bias tests,  
14 254 specifically designed for comparative data, were not considered applicable. As such, statistical pursuit of publication  
15 255 bias was not undertaken. Instead, a methodologically appropriate qualitative assessment of publication bias was  
16 256 implemented for this type of analysis. This approach was deemed to provide the most accurate and robust outcome.

For peer review only



## 257 **Supplementary eResults**

258

259 Our analysis incorporated forty-four relevant studies. Key study and participant details are summarized in **eTable 1**,  
260 with a concise overview provided in the main text. Articles excluded based on our criteria are listed in **eTable 5**.

261

### 262 **Diagnostic reliability of teledermatology when compared to F2F (specialist and non-specialists) evaluation**

263 Of the 40 studies that reported diagnostic agreement rates there were 72 unique comparisons made between F2F and  
264 teledermatology.(5, 6, 7, 8, 9, 10, 11, 12, 13, 14, 15, 16, 17, 18, 19, 20, 21, 22, 23, 24, 25, 26, 27, 28, 29, 30, 31, 32,  
265 33, 34, 35, 36, 37, 38, 39, 40, 41, 42, 43, 44) **eFigure 1A** shows that the mean percentage agreement of 68.9% (CI  
266 64.4%-73.1%) ranged from 14% to 98%, where 35/72 had percentage agreement above 70% and 7 studies had over  
267 90% agreement. The studies were heterogeneous ( $I^2=98\%$ ,  $p < 0$ ).

268

269 Of the 21 studies that reported concordance values, there were 45 unique comparisons made.(5, 6, 11, 14, 17, 20, 21,  
270 22, 23, 24, 25, 28, 29, 32, 33, 34, 45, 46, 47, 48, 49) **eFigure 1B** shows that the mean diagnostic concordance of 0.67  
271 (CI 0.60 to 0.74) ranged from 0.213 (CI 0.20 to 0.23) to 0.96 (CI 0.92 to 0.98), with 21 studies (47%) having moderate  
272 agreement ( $k=0.6$  and above), and 13 (29%) studies having strong agreement. The studies were heterogeneous  
273 ( $I^2=100\%$ ,  $p < 0.001$ ).

274

### 275 **Diagnostic agreement between teledermatologist and teledermatologist, F2F and F2F, and teledermatology 276 and histopathology**

277 Of the ten studies that reported diagnostic agreement rates between telermatologists, there were 17 unique comparisons  
278 made between F2F and teledermatology consults. **eFigure 2A** shows the mean percentage agreement of 76.4% (CI  
279 69% to 82.5%) ranged from 37% to 91.5%, with 10/17 having percentage agreement above 70% and two studies  
280 having over 90% agreement. The studies were heterogeneous ( $I^2=97\%$ ,  $p < 0.001$ ).

281

282 From four studies that reported diagnostic agreement rates between F2F dermatologists there were 6 unique  
283 comparisons. **eFigure 2B** shows that the mean percentage agreement 82.4% (CI 76.7% -87.0%) ranged from 75.5% to  
284 91%. The studies were heterogeneous ( $I^2=68\%$ ,  $p < 0.001$ ).

285

286 Five studies compared teledermatology to histopathology data, and there were six unique comparisons. **eFigure 2C**  
287 shows that the mean percentage agreement of 55.7% (CI 53% to 58.4%) ranged from 53.8% to 65.4%. The mean  
288 agreement rate between histopathology and teledermatology was 55.7% (CI 53.0 to 58.4). The studies were  
289 homogeneous ( $I^2=0\%$ ,  $p = 0.49$ ).

290

## 291 **Subgroup analyses**

292

### 293 **Diagnostic reliability of teledermatology vs F2F specialist and non-specialist**

294

295 Within the same modality, **eFigure 3A** shows that teledermatologists had a diagnostic agreement rate of 70.96% (CI  
296 69.8% to 72.1%) with F2F dermatologists, while the agreement rate with F2F non-specialists was 44.1% (CI 39.9%  
297 to 48.4%). Comparing telermatologists to non-specialists showed significantly lower agreement among non-specialists  
298 ( $p < 0.001$ , heterogeneity:  $I^2 = 98\%$ ). Among 35 studies reporting diagnostic agreement rates, 44 out of 64  
299 comparisons between teledermatology and F2F dermatologists had a percentage agreement above 60%, with seven  
300 studies reporting over 90% agreement. The mean kappa concordance value for diagnostic agreement between  
301 teledermatology and F2F dermatologists shown in **eFigure 3B** was 0.69 (CI 0.60 to 0.75). Additionally,  
302 telermatologists had a mean concordance value of 0.52 (CI 0.25 to 0.71) when compared to non-specialists. Non-  
303 specialists showed significantly lower diagnostic concordance compared to dermatologists for F2F vs.  
304 teledermatology ( $p = 0.031$ , heterogeneity:  $I^2 = 100\%$ ). Moreover, studies comparing teledermatologists to F2F and  
305 teledermatology to histopathology showed a range of agreement rates, with heterogeneity observed in the former ( $I^2$   
306  $= 97\%$ ,  $p < 0.001$ ) and homogeneity in the latter ( $I^2 = 0\%$ ,  $p = 0.49$ ).

307

### 308 **Diagnostic reliability of teledermatology vs F2F by the inclusion of teledermoscopy in both teledermatology 309 and F2F assessments**

310 Overall, twelve studies with 22 unique comparisons used teledermoscopy for diagnosing suspicious lesions.(8, 11, 15,  
311 29, 32, 34, 38, 39, 42, 44) **eFigure 4A** shows that with teledermoscopy, the mean diagnostic agreement rates was  
312 69.1% (CI 66.8% to 71.4%), and this percentage ranged between from 31.6% to 92.3%. Without the use of

7

1  
2  
3 313 teledermoscopy, the mean agreement rate was 68.3% (CI 66.8% to 69.8%). The means were not significantly different  
4 314 between the two groups and the studies were heterogeneous ( $I^2=97%$ ,  $p<0.001$ ). **eFigure 4B** shows concordance  
5 315 values of seven studies that adapted teledermoscopy had a mean of 0.71 (CI 0.58 to 0.80).(11, 29, 32, 34, 39, 47, 48)  
6 316 Without teledermoscopy, the mean was 0.65 (CI 0.54 to 0.74). This difference was not statistically significant, and  
7 317 the studies were heterogeneous ( $I^2=100%$ ,  $p<0.001$ ).  
8 318

### 9 319 **Diagnostic reliability of teledermatology vs F2F by the inclusion of lesion category**

10 320 Twenty-six studies with 39 unique comparisons reporting percentage agreement rates that were inclusive to all lesion  
11 321 types as shown in **eFigure 5A**.(5, 6, 7, 8, 9, 10, 15, 16, 17, 18, 19, 22, 24, 25, 26, 28, 29, 30, 31, 32, 33, 36, 37, 40,  
12 322 41, 43) The mean percentage agreement was 69.9% (CI 67.9% to 71.7%) and ranged from 30.9% to 98%, with the  
13 323 majority (26/39) having percentage agreement above 60% and 4 studies having over 90%. Eleven studies only looked  
14 324 at suspicious lesions,(11, 12, 14, 20, 23, 34, 35, 38, 39, 42, 44) and the mean percentage agreement was 68.1% (CI  
15 325 66.3% to 69.8%). Three studies excluded skin cancers(13, 21, 27) and the mean percentage agreement was 62.2% (CI  
16 326 56.2% to 67.8%). No statistical significance could be identified between the three lesion groups and the studies were  
17 327 heterogeneous ( $I^2=98%$ ,  $p<0.001$ ).  
18 328

19 329 Concordance values for studies inclusive to all lesions seen in **eFigure 5B** were reported in ten studies with a mean  
20 330 of 0.62 (CI 0.48 to 0.74).(5, 6, 17, 22, 24, 25, 28, 29, 32, 33) Six studies that looked at cancerous skin lesions only  
21 331 reported a mean of 0.70 (CI 0.59 to 0.78).(11, 14, 20, 23, 34, 39) Only one study that looked at all lesions except  
22 332 cancerous ones reported a concordance value.<sup>22</sup> No statistical significance could be identified between the three lesion  
23 333 groups and the studies were heterogeneous ( $I^2=100%$ ,  $p<0.001$ ).  
24 334  
25 335

### 26 336 **Diagnostic reliability of teledermatology vs F2F by pre- and post-pandemic timelines**

27 337 When comparing telermatologists to all F2F physicians, the average agreement rate was 65.5% (CI 64.0-66.9) for pre-  
28 338 pandemic studies, and 75.3% (CI 73.4% to 77.2%) for studies published after January 2020. When the percentage  
29 339 agreements were compared between the two groups, they were not statistically significant ( $p = 0.421$ ) and also  
30 340 heterogeneous ( $I^2=98%$ ,  $p<0.001$ ). eTable not included.  
31 341  
32 342

### 33 343 **Risk of bias and quality assessment**

34 344 The QUADAS-2 framework was utilized to evaluate bias and applicability across four essential domains, ensuring  
35 345 that our conclusions are both accurate and applicable to real-life clinical situations. **eTable 6A** summarizes the  
36 346 QUADAS-2 criteria tailored to this study.  
37 347

38 348 The results of quality assessment for risk of bias and applicability in individual studies are displayed in. **eTable 6B-**  
39 349 **E**. Six of the studies had low risk of bias, nine had moderate risk, and 29 had high-risk of bias. There were no  
40 350 systematic differences between the results of studies that attempted to reduce risk of bias, compared with those with  
41 351 higher risk of bias. The mean diagnostic agreement rate between F2F and teledermatology was 66.4% (CI 62.4% to  
42 352 70.1%) for low risk, and 69.1% (CI 67.6% to 70.6%) for high risk ( $p = 0.932$ ). When the percentage agreements were  
43 353 compared between groups, they were heterogeneous ( $I^2=98%$ ,  $p<0.001$ ). eTable not included.  
44  
45  
46  
47  
48  
49  
50  
51  
52  
53  
54  
55  
56  
57  
58  
59

354 **Supplementary eFigures and Legends**

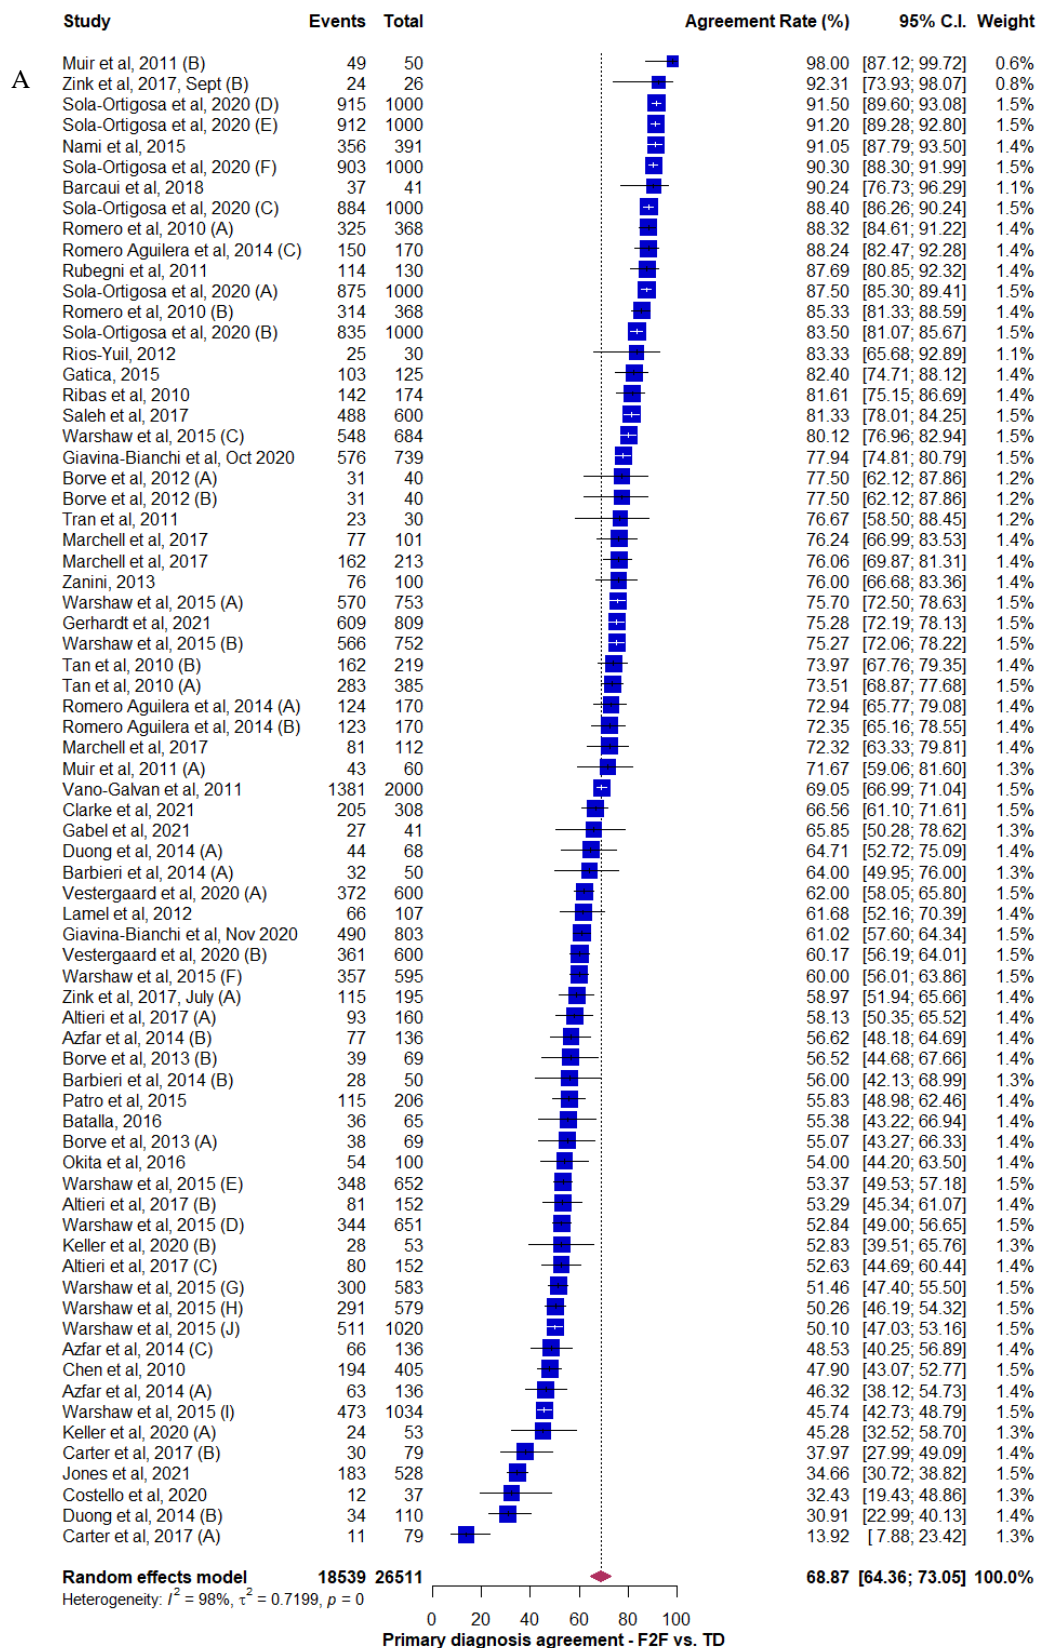

355

1

2

3

4

5

6

7

8

9

10

11

12

13

14

15

16

17

18

19

20

21

22

23

24

25

26

27

28

29

30

31

32

33

34

35

36

37

38

39

40

41

42

43

44

45

46

47

48

49

50

51

52

53

54

55

56

57

58

59

60

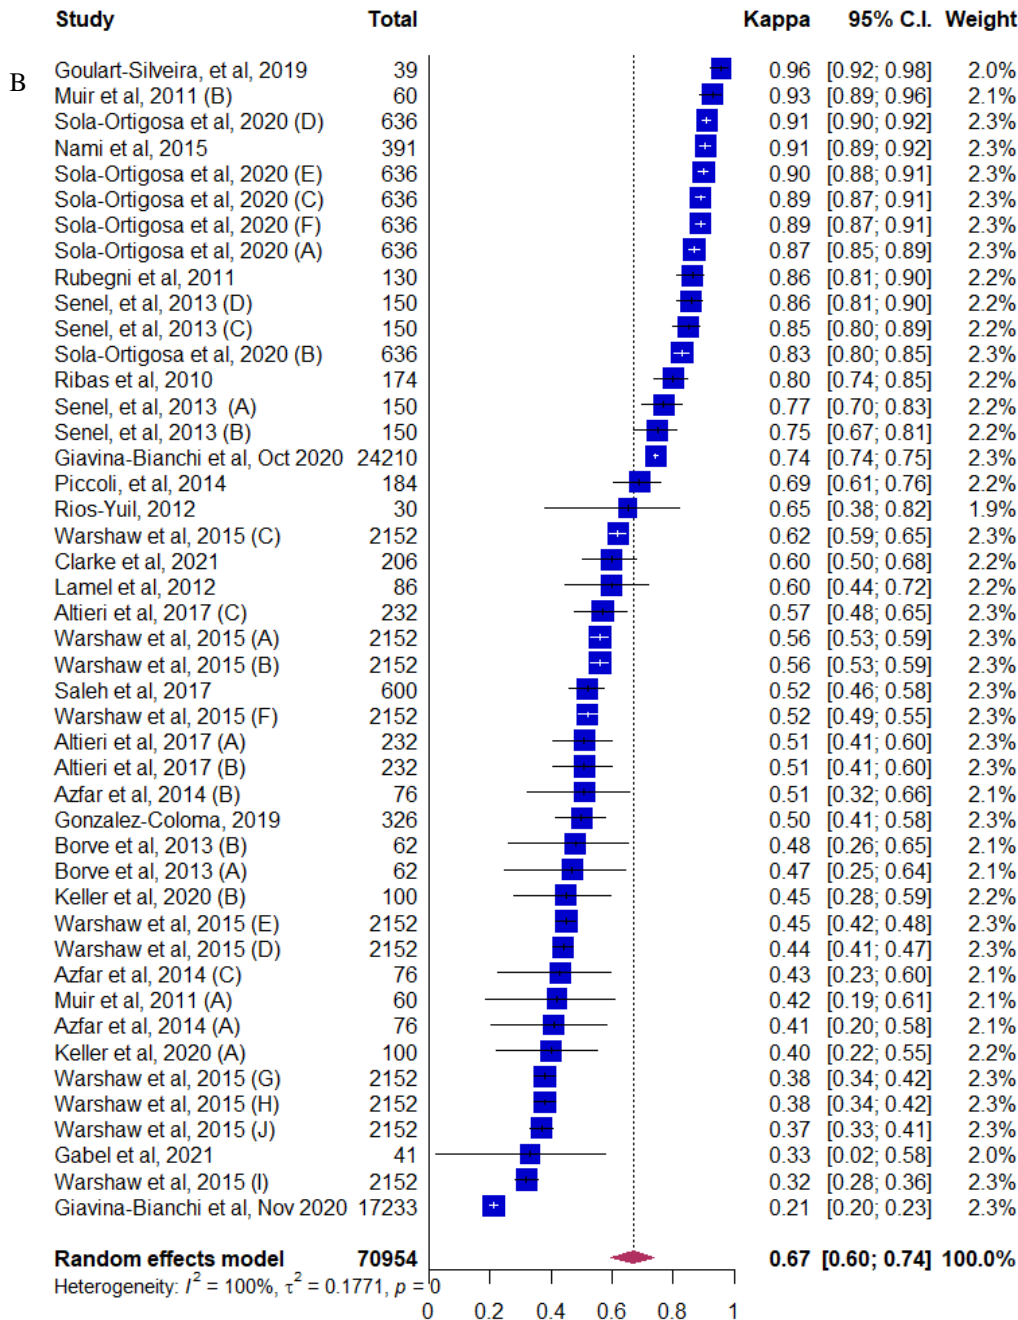356  
357

358

359

360

361

362

363

**eFigure 1. Forest plot representing F2F and teledermatology primary diagnostic agreement.** (A) Forest plot representing percentage agreement and 95% C.I. for overall concordance across 40 studies with a total of 72 unique number of comparisons, N of events and total included participants. (B) Forest plot representing kappa concordance and 95% C.I. for overall concordance across 21 studies with a total of 45 unique number of comparisons, N of total included participants. Abbreviations: F2F (Face-to-Face), PCP (Primary Care Provider), TD (Teledermatology or Teledermatologist).



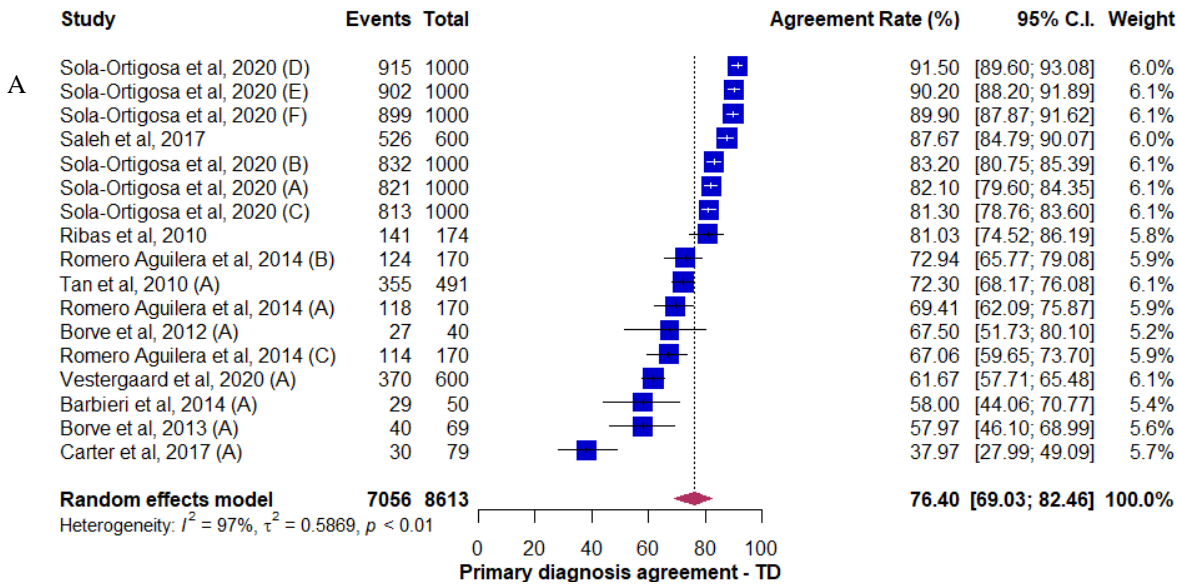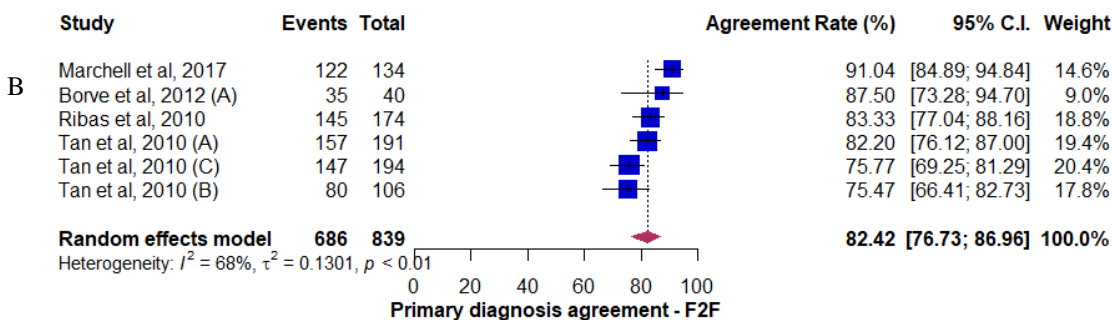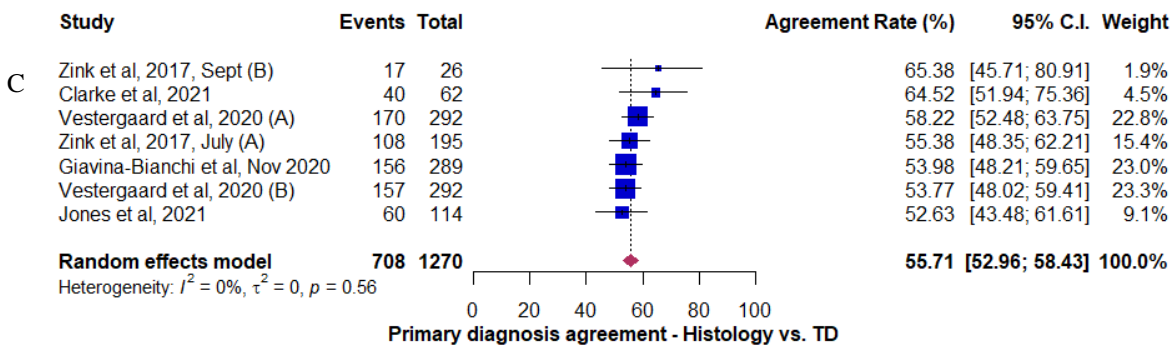

367 **eFigure 2. Forest plot representing teledermatologists, F2F physicians, and histopathology primary diagnostic**  
 368 **agreements.** (A) Forest plot representing percentage agreement between teledermatologist and teledermatologist and  
 369 95% C.I. for overall concordance across ten studies with a total of 17 unique number of comparisons, N of events and  
 370 total included participants. (B) Forest plot representing kappa concordance and 95% C.I. for overall concordance  
 371 between two F2F physician diagnoses across four studies with a total of six unique number of comparisons, N of total  
 372 included participants. (C) Forest plot representing percentage agreement between teledermatologists and  
 373 histopathology with 95% C.I. for overall concordance across six studies, N of events and total included participants.  
 374 Abbreviations: F2F (Face-to-Face), PCP (Primary Care Provider), TD (Teledermatology or Teledermatologist).  
 375

A

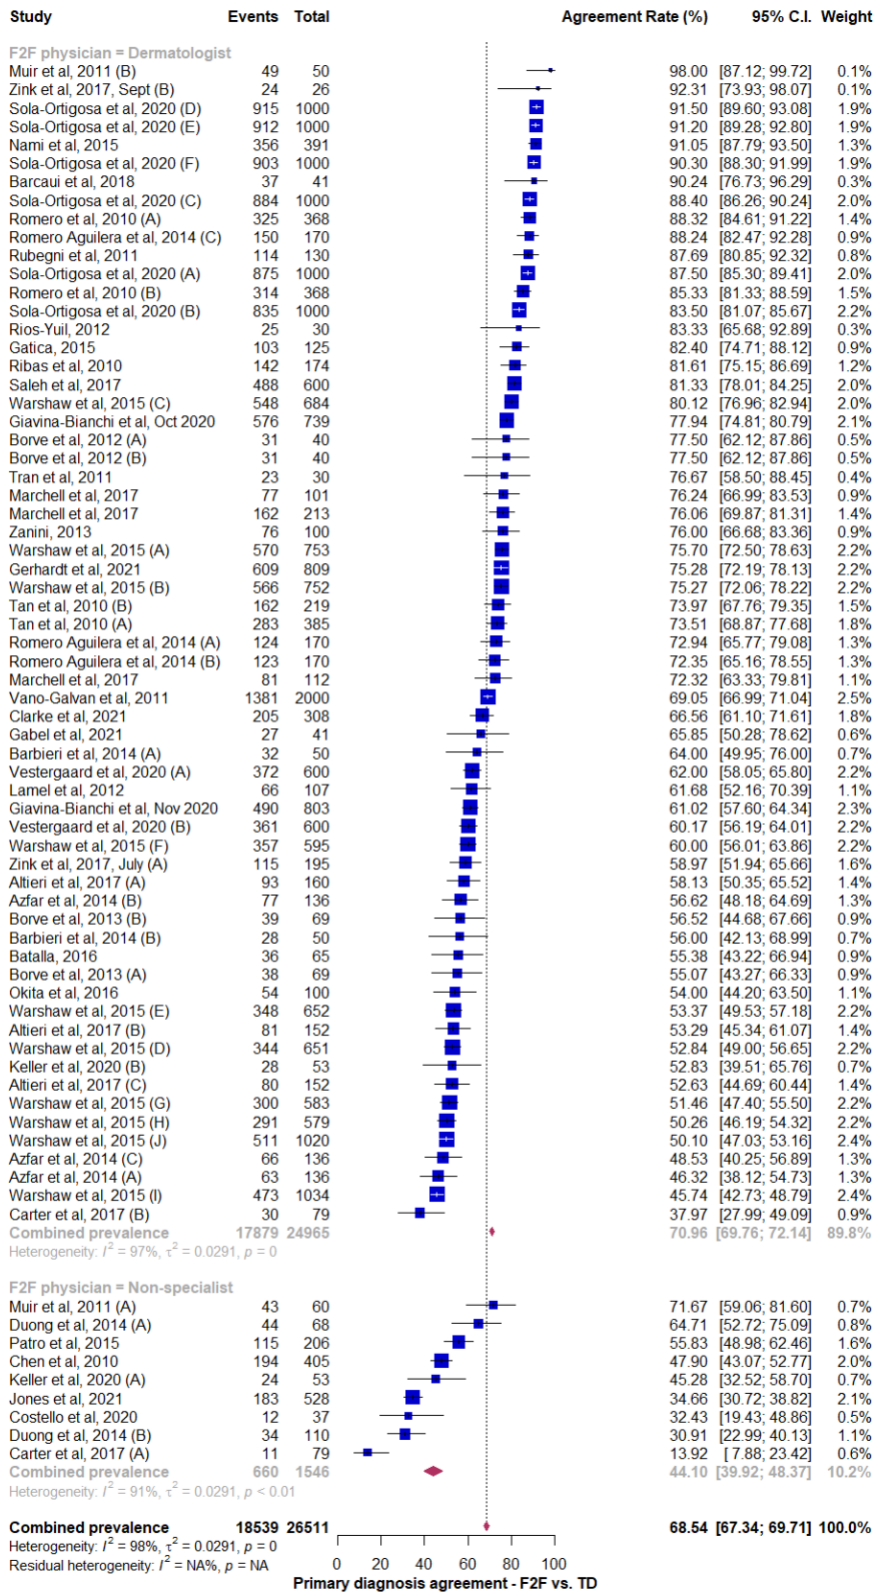

376

12

B

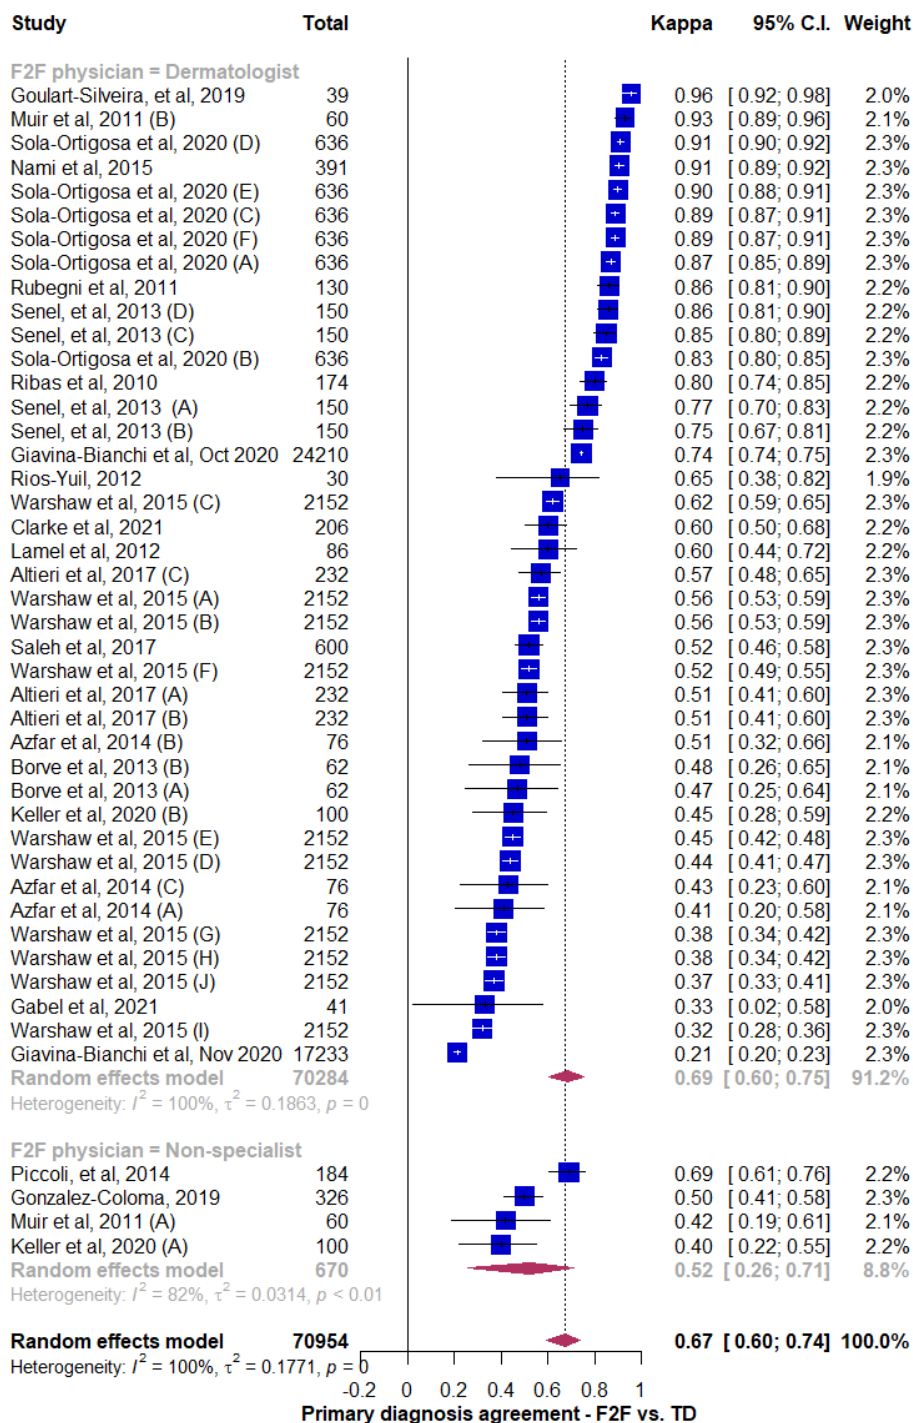

377  
 378 **eFigure 3. Forest plot representing F2F and teledermatology primary diagnostic agreement by specialization**  
 379 **status of the F2F physician.** Studies were sorted into two groups, a) F2F diagnosis completed by a board-certified  
 380 dermatologist; b) F2F diagnosis completed by a non-specialist (e.g., general practitioner). (A) Forest plot representing  
 381 percentage agreement and 95% C.I. for overall concordance across 40 studies with a total of 72 unique number of  
 382 comparisons, N of events and total included participants. (B) Forest plot representing kappa concordance and 95%  
 383 C.I. for overall concordance across 21 studies with a total of 45 unique number of comparisons, N of total included



1  
2  
3  
4  
5  
6  
7  
8  
9  
10  
11  
12  
13  
14  
15  
16  
17  
18  
19  
20  
21  
22  
23  
24  
25  
26  
27  
28  
29  
30  
31  
32  
33  
34  
35  
36  
37  
38  
39  
40  
41  
42  
43  
44  
45  
46  
47  
48  
49  
50  
51  
52  
53  
54  
55  
56  
57  
58  
59  
60

384 participants. Abbreviations: F2F (Face-to-Face), PCP (Primary Care Provider), TD (Teledermatology or  
385 Teledermatologist).  
386

For peer review only

A

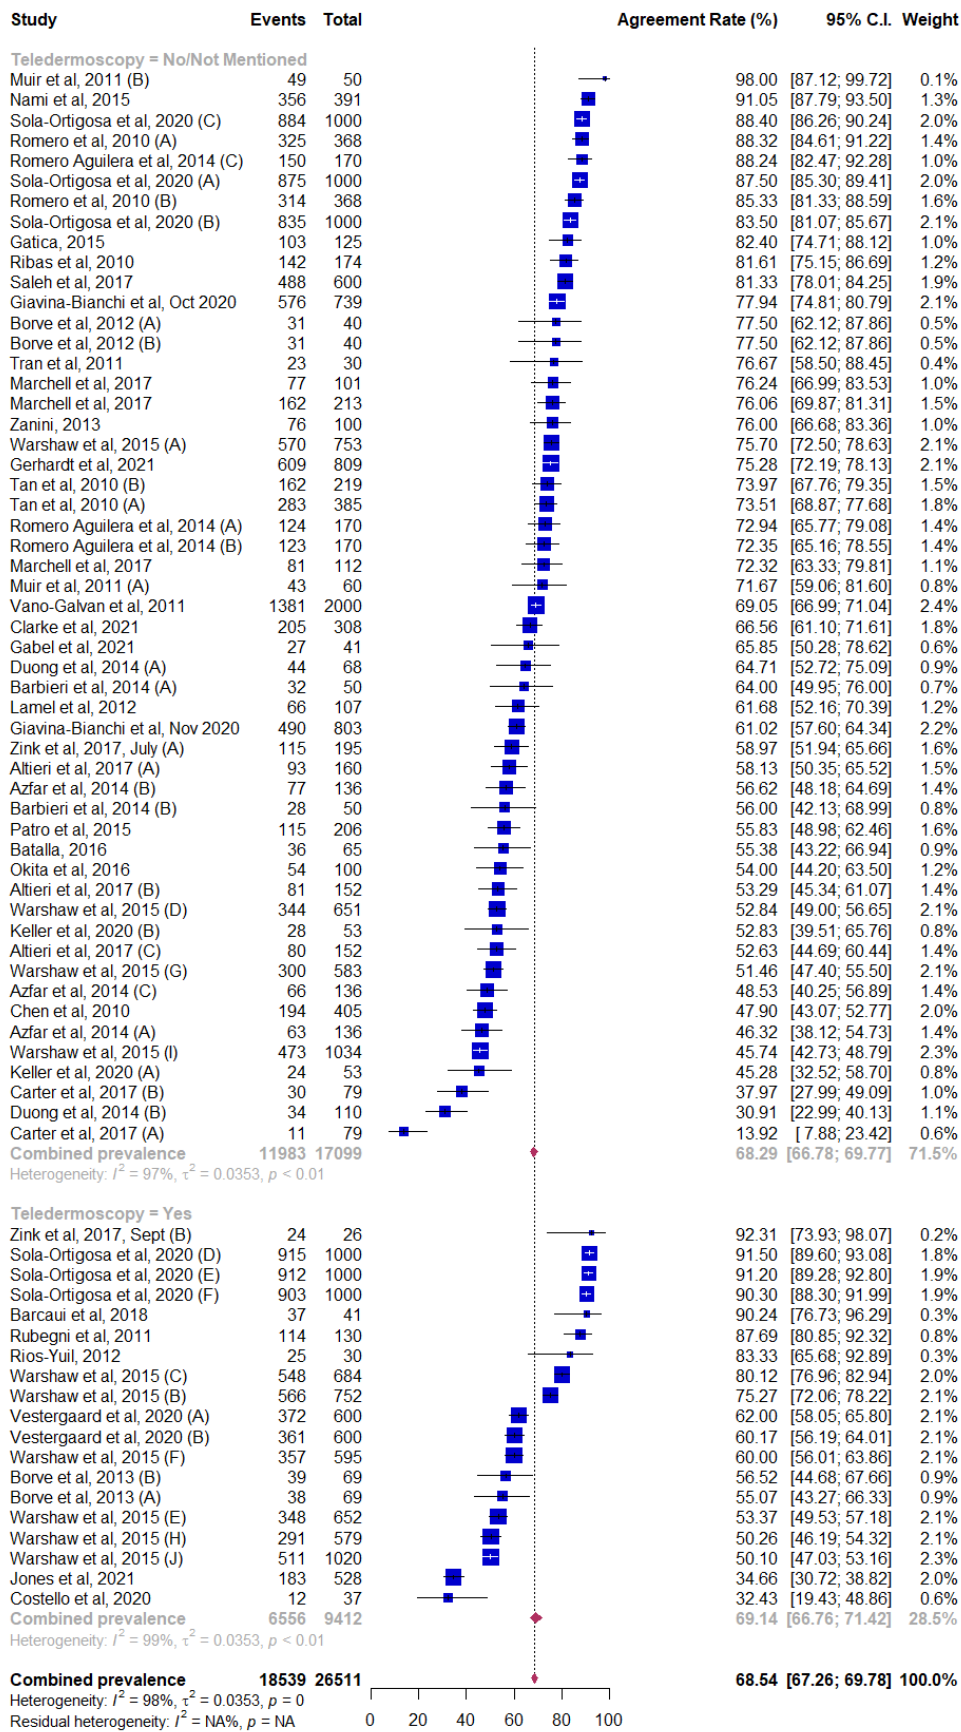

387

15

B

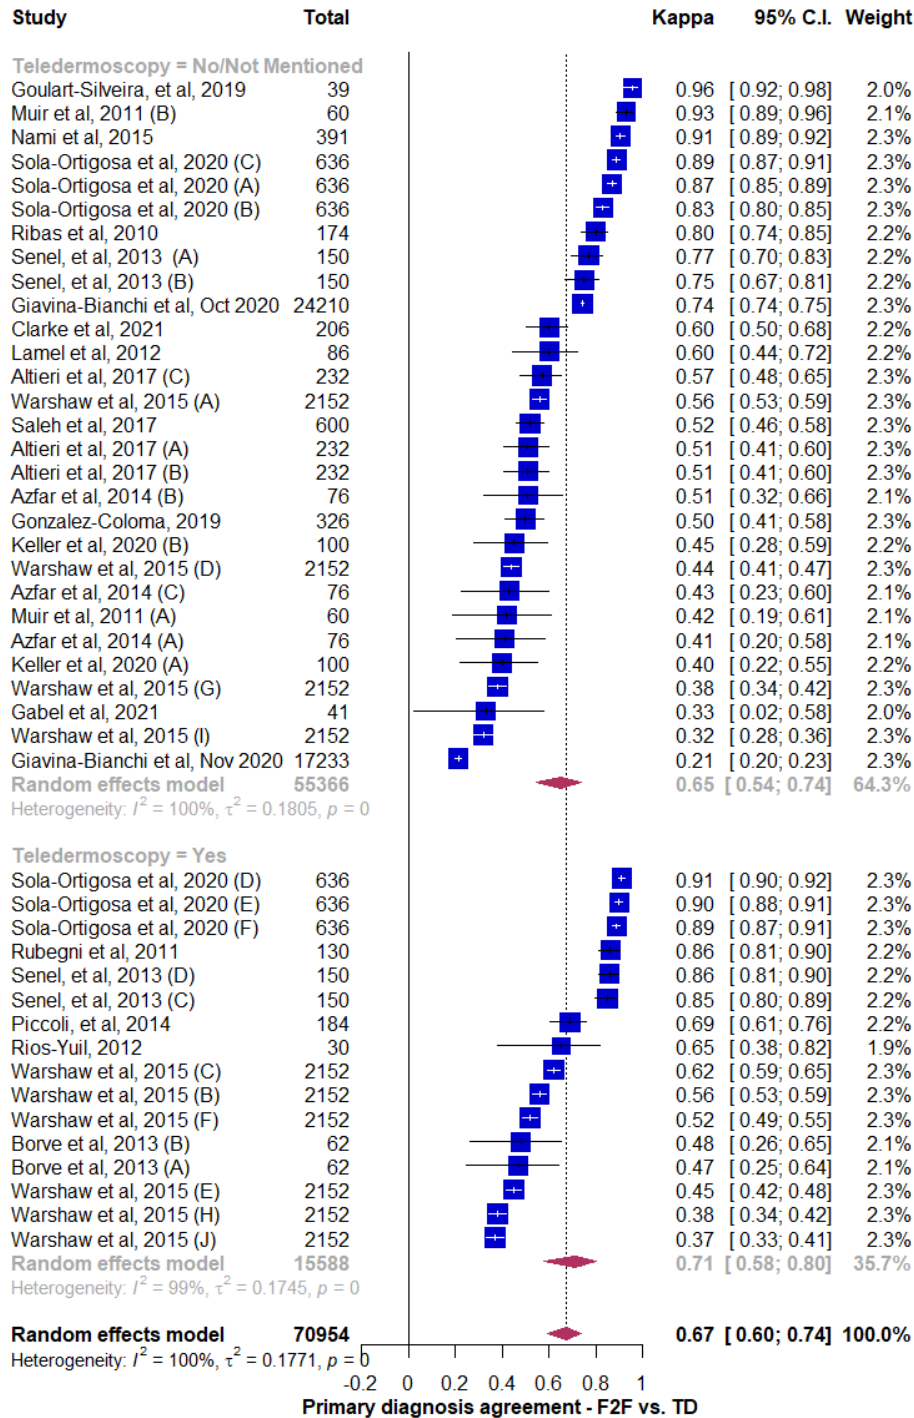

388  
389 **eFigure 4. Forest plot representing F2F and teledermatology primary diagnostic agreement by utilization of**  
390 **teledermoscopy.** Studies were sorted into two groups, i) Did not use or did not report the use of teledermoscopy; ii)  
391 Used teledermoscopy. (A) Forest plot representing percentage agreement and 95% C.I. for overall concordance across  
392 12 studies with a total of 22 unique number of comparisons, N of events and total included participants. (B) Forest  
393 plot representing kappa concordance and 95% C.I. for overall concordance across seven studies with a total of 16  
394 unique number of comparisons, N of total included participants. Abbreviations: F2F (Face-to-Face), PCP (Primary  
395 Care Provider), TD (Teledermatology or Teledermatologist).

A

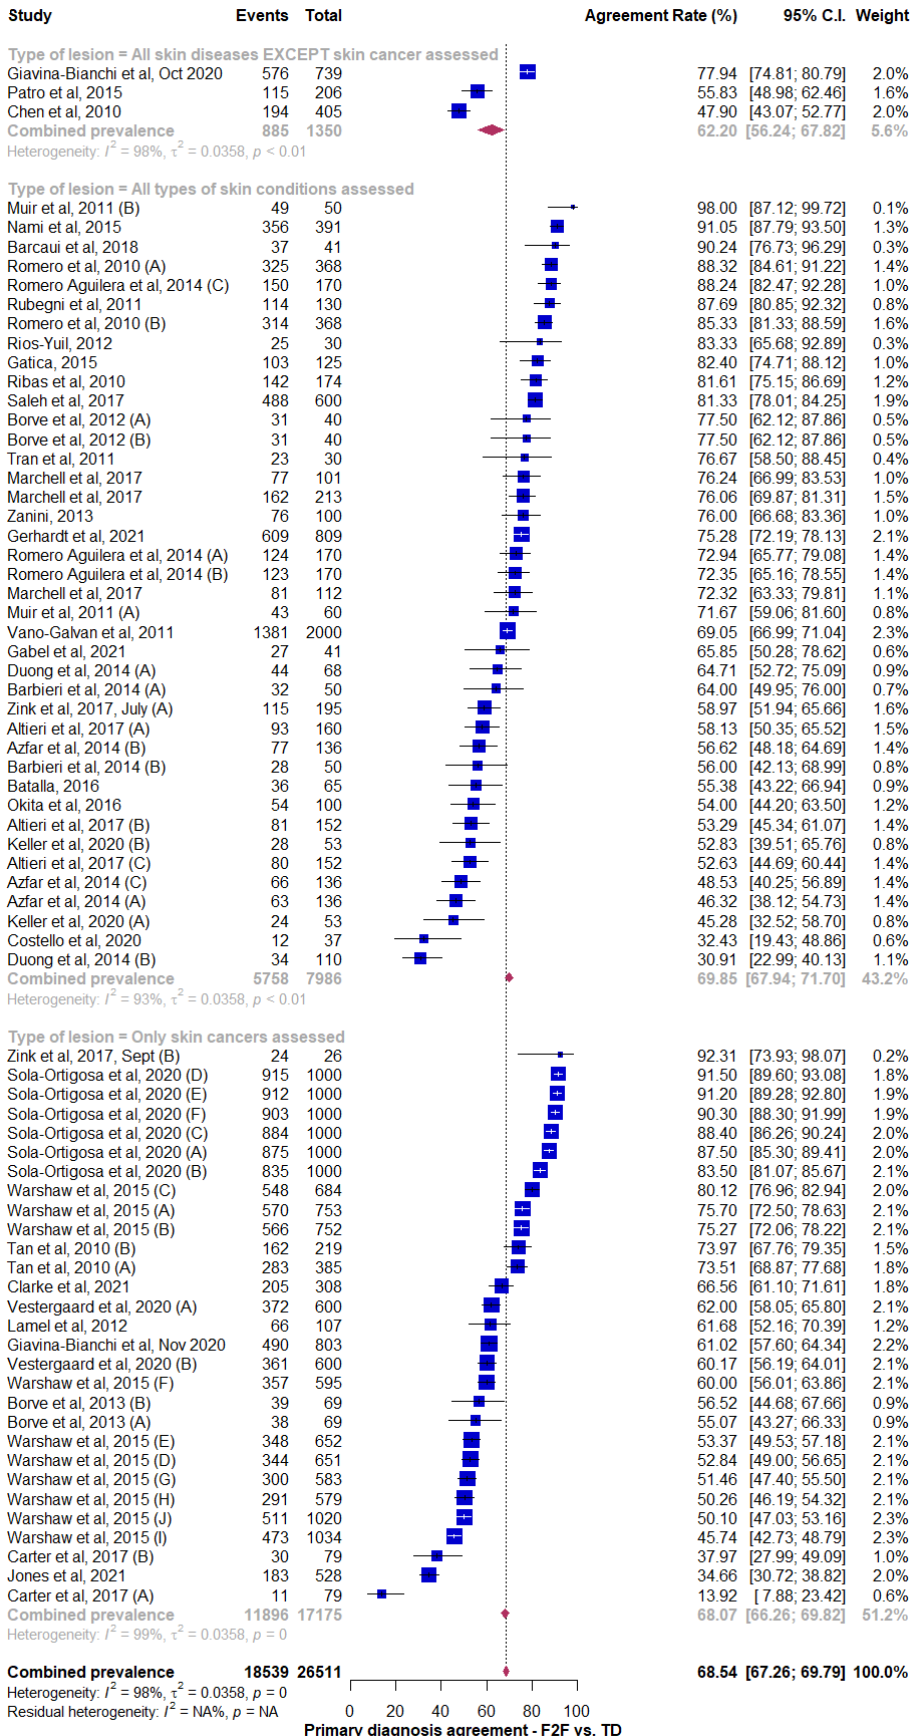

B

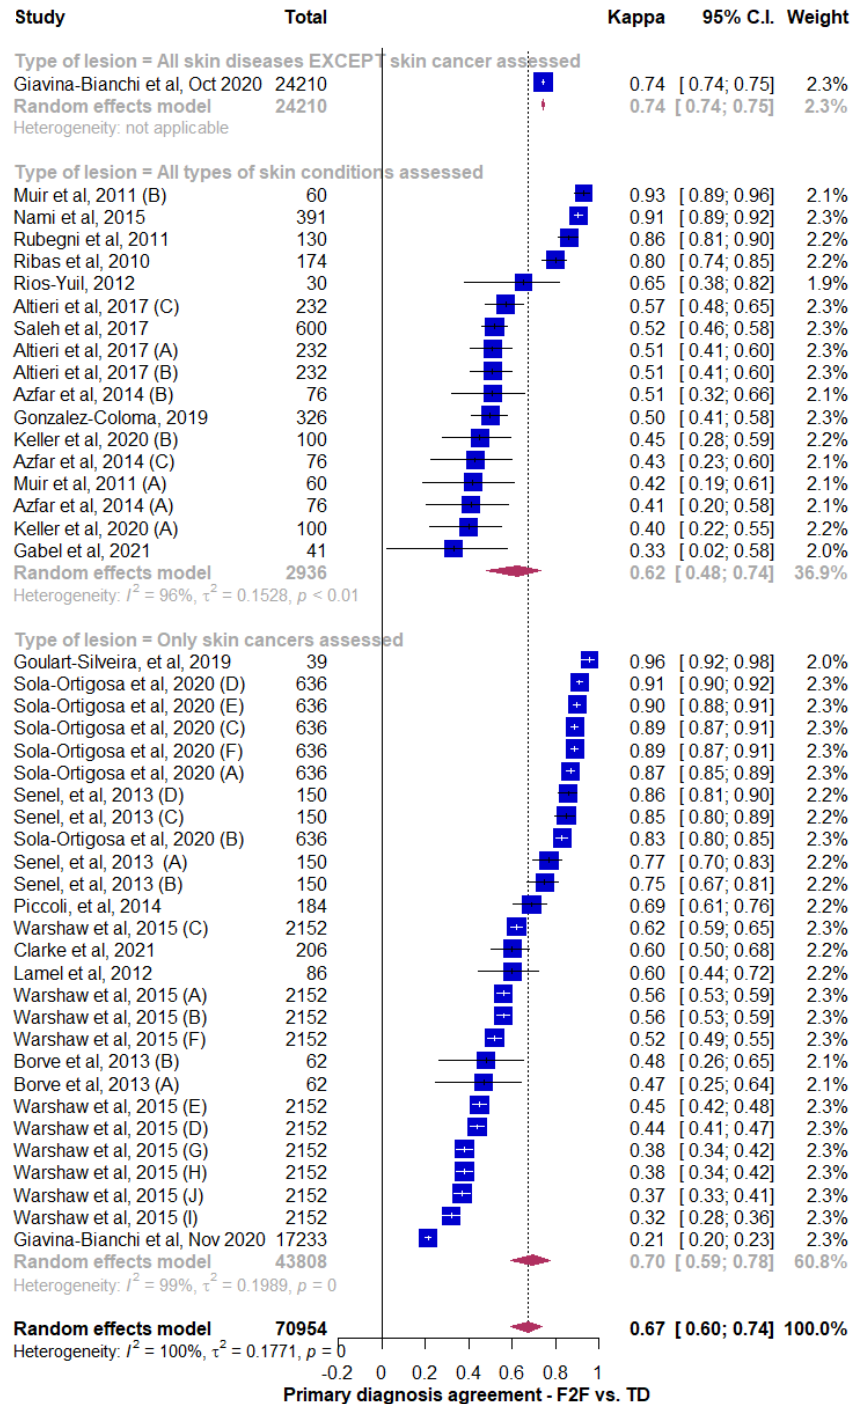

**eFigure 5. Forest plot representing F2F and teledermatology primary diagnostic agreement by skin lesion category.** Studies were sorted into three groups according to the type of lesions included, i) All skin conditions except likely malignant lesions; ii) All skin conditions; iii) Likely malignant lesions only. (A) Forest plot representing percentage agreement and 95% C.I. for overall concordance across 26 studies with a total of 39 unique number of comparisons, N of events and total included participants. (B) Forest plot representing kappa concordance and 95% C.I. for overall concordance across ten studies with a total of 27 unique number of comparisons, N of total included participants. Abbreviations: F2F (Face-to-Face), PCP (Primary Care Provider), TD (Teledermatology or Teledermatologist).



| Author, Year                   | Study design                   | Country           | Funding reported | Intervention                                                                                                                                            | *Outcome                                                              | Patients (n) | Female (%) | Mean Age (y) | Lesions (N) |
|--------------------------------|--------------------------------|-------------------|------------------|---------------------------------------------------------------------------------------------------------------------------------------------------------|-----------------------------------------------------------------------|--------------|------------|--------------|-------------|
| <b>TD vs F2F Dermatologist</b> |                                |                   |                  |                                                                                                                                                         |                                                                       |              |            |              |             |
| Altieri, et al, 2017           | Prospective Cohort             | USA               | Y                | TD and F2F dermatologists via clinical images taken by digital photography                                                                              | Diagnostic agreement rate, Concordance                                | 232          | N/A        | NA           | 232         |
| Azfar, et al, 2014             | Prospective Cohort             | USA, Botswana     | N                | TD and F2F dermatologists via smartphone images                                                                                                         | Diagnostic agreement rate, Concordance                                | 76           | 57         | 39           | 159         |
| Barbieri, et al, 2014          | Prospective Cohort             | USA               | N                | TD and F2F dermatologists via smartphone images using the AccessDerm smartphone platform                                                                | Diagnostic agreement rate                                             | 50           | 64         | 55.2         | 50          |
| Barcaui, et al, 2018           | Prospective Cohort             | Brazil            | N                | TD and F2F consult by the same dermatologist via digital photography and dermoscopy images stored in WhatsApp                                           | Diagnostic agreement rate                                             | 31           | 71         | 56.5         | 41          |
| Batalla, 2015                  | Retrospective Cohort           | Spain             | N                | TD and F2F dermatologists by via clinical images                                                                                                        | Diagnostic agreement rate                                             | 183          | 66         | 9            | 65          |
| Borve, et al, 2012             | Prospective Cohort             | Sweden            | Y                | TD and F2F consults by the same dermatologist via smartphone images stored in Tele-Dermis                                                               | Diagnostic agreement rate                                             | 40           | 57.5       | 49           | 40          |
| Gabel, et al, 2021             | Prospective Cohort             | USA               | Y                | TD and F2F dermatologists via clinical images taken by digital photography and tablets                                                                  | Diagnostic agreement rate, Concordance                                | 41           | N/A        | N/A          | 41          |
| Gatica, et al, 2015            | Prospective Cohort             | Chile             | N                | TD and F2F dermatologists via clinical images taken by digital photography                                                                              | Diagnostic agreement rate                                             | 125          | 57.6       | 37.7         | 125         |
| Gerhardt, et al, 2021          | Retrospective Cohort           | USA               | Y                | TD and F2F dermatologists via clinical images                                                                                                           | Diagnostic agreement rate                                             | 809          | N/A        | N/A          | 809         |
| Keller, et al, 2020            | Prospective Cohort             | USA               | Y                | TD and F2F dermatologists or hospitalists on clinical images taken by smartphones and tablets                                                           | Diagnostic agreement rate, Concordance                                | 100          | 43.2       | N/A          | 100         |
| Marchell, et al., 2017         | Quasi RCT                      | USA               | Y                | TD and F2F dermatologists via digital photography, compressed and uncompressed video                                                                    | Diagnostic agreement rate (SFTD, video)                               | 216          | N/A        | N/A          | 216         |
| Muir, et al, 2011              | Prospective Cohort             | Australia         | N                | TD and F2F emergency derms and non-specialists via clinical images taken by digital photography                                                         | Diagnostic agreement rate, Concordance                                | 50           | 65         | 47           | 50          |
| Nami, et al, 2015              | Prospective Cohort             | Italy and Austria | Y                | TD and F2F dermatologists via smartphone images stored in MugDerma                                                                                      | Diagnostic agreement rate, Concordance                                | 391          | 52.2       | 54           | 391         |
| Okita, et al, 2016             | Prospective Cohort             | Brazil            | N                | TD and F2F dermatologists via smartphone images                                                                                                         | Diagnostic agreement rate                                             | 100          | N/A        | N/A          | 100         |
| Ribas, et al, 2010             | Prospective Cohort             | Brazil            | Y                | TD and F2F dermatologists via digital photography                                                                                                       | Diagnostic agreement rate, Concordance                                | 174          | 53.4       | 34.7         | 174         |
| Rios-Yuil, 2011                | RCT                            | Panama            | N                | TD and F2F dermatologists via clinical images taken by digital photography for case conferences                                                         | Diagnostic agreement rate, Concordance                                | 30           | 63.3       | N/A          | 30          |
| Romero Aguilera, et al, 2014   | Prospective Cohort             | Spain             | Y                | TD and F2F dermatologists via clinical images taken by digital photography stored in DERMARED. Some patients were seen by the same derm for F2F and TD. | Diagnostic agreement rate                                             | 457          | 56%        | 36           | 170         |
| Romero, et al, 2010            | RCT                            | Spain             | Y                | TD and F2F consults by the same dermatologist via digital photography and videoconferences via DERMARED software                                        | Diagnostic agreement rate                                             | 328          | 56%        | 36           | 510         |
| Rubegni, et al, 2011           | Prospective Cohort             | Italy             | N                | TD and F2F dermatologists via digital photography and dermoscopy images stored in Dermo-image.                                                          | Diagnostic agreement rate, Concordance                                | 130          | 53.9       | 80.6         | 130         |
| Saleh, et al, 2017             | Prospective Cohort             | Egypt             | Y                | TD and F2F dermatologists via clinical images taken by digital photography stored in Dropbox                                                            | Diagnostic agreement rate, Concordance                                | 600          | 50.7       | N/A          | 600         |
| Tran, et al, 2011              | Prospective Cohort             | Egypt             | Y                | TD and F2F dermatologists via smartphone images stored in ClickDoc                                                                                      | Diagnostic agreement rate                                             | 30           | N/A        | N/A          | 30          |
| Vano-Galvan, et al, 2010       | Retrospective, Cross-sectional | Spain             | N                | TD and F2F dermatologists via clinical images taken by digital photography for case conferences                                                         | Diagnostic agreement rate, 100 patients each analyzed by 20 observers | 100          | N/A        | N/A          | 100         |
| Zanini, 2013                   | Prospective Cohort             | Brazil            | N                | TD and F2F dermatologists via clinical images taken by digital photography                                                                              | Diagnostic agreement rate                                             | 100          | N/A        | N/A          | 100         |
| Zink, et al, 2017, July        | Prospective Cohort             | Germany           | Y                | TD and F2F dermatologists via smartphone images stored in the KLARA app                                                                                 | Diagnostic agreement rate                                             | 195          | 20.5       | N/A          | 195         |

All lesions

| Author, Year                     | Study design                   | Country     | Funding reported | Intervention                                                                                                              | *Outcome                                                           | Patients (n) | Female (%) | Mean Age (y) | Lesions (N) |                   |
|----------------------------------|--------------------------------|-------------|------------------|---------------------------------------------------------------------------------------------------------------------------|--------------------------------------------------------------------|--------------|------------|--------------|-------------|-------------------|
| Costello, et al, 2019            | Prospective, Cross-sectional   | USA         | Y                | TD and F2F PCP via smartphone and dermoscopy images using the Photo Exam app                                              | Diagnostic agreement rate                                          | 37           | 65         | 47.9         | 37          | Skin cancers only |
| Duong, et al, 2014               | Prospective, Observational     | France      | Y                | TD and F2F emergency physicians via smartphone images and videoconferences                                                | Diagnostic agreement rate (SFTD, video)                            | 194          | N/A        | N/A          | 178         |                   |
| Gonzalez-Coloma, et al, 2019     | Prospective, Cross-sectional   | Chile       | N                | TD and F2F PCP via clinical images                                                                                        | Diagnostic concordance                                             | 326          | 59         | 35.8         | 326         |                   |
| Keller, et al, 2020              | Prospective Cohort             | USA         | Y                | TD and F2F dermatologists or hospitalists on clinical images taken by smartphones and tablets                             | Diagnostic agreement rate, Concordance                             | 100          | 43.2       | N/A          | 100         |                   |
| Muir, et al, 2011                | Prospective Cohort             | Australia   | N                | TD and F2F emergency physicians via clinical images taken by digital photography                                          | Diagnostic agreement rate, Concordance                             | 60           | 65         | 47           | 60          |                   |
| Carter, et al, 2017              | Ambispective Cohort            | USA         | Y                | TD and F2F dermatologists, as well as F2F PCP via clinical images stored using Epic EHR software                          | Diagnostic agreement rate                                          | 79           | 74         | 47           | 79          |                   |
| Jones, et al, 2021               | Retrospective Cohort           | New Zealand | Y                | TD and F2F PCP via digital photography and dermoscopy images                                                              | SSC matched for age, sex, and ethnicity. Diagnostic agreement rate | 481          | 64         | N/A          | 528         |                   |
| Piccoli, et al, 2015             | Retrospective, Cross-sectional | Brazil      | Y                | TD and F2F PCP via digital photography and dermoscopy images                                                              | Diagnostic concordance                                             | 184          | 73.4       | 54.7         | 184         |                   |
| Chen, et al, 2010                | Retrospective Cohort           | USA         | Y                | TD and F2F PCP via clinical images stored in Second Opinion Software                                                      | Diagnostic agreement rate                                          | 405          | 50.6       | 5.9          | 405         |                   |
| Patro, et al 2015                | Prospective Cohort             | India       | Y                | TD and F2F PCP via digital photography                                                                                    | Diagnostic agreement rate                                          | 206          | 58.7       | N/A          | 206         |                   |
| Blomberg, et al, 2013            | Prospective Cohort             | Sweden      | Y                | TD and F2F consults by the same dermatologist via smartphone and dermoscopy images stored in iDoc 24 app                  | Diagnostic agreement rate, Concordance                             | 62           | 38.7       | 64           | 69          |                   |
| Carter, et al, 2017              | Ambispective Cohort            | USA         | Y                | TD and F2F dermatologists, as well as F2F PCP via clinical images stored using Epic EHR software                          | Diagnostic agreement rate                                          | 79           | 74         | 47           | 79          |                   |
| Clarke, et al, 2021              | Prospective Cohort             | USA         | Y                | TD and F2F dermatologists via clinical images taken by digital photography stored in Research Electronic Data Capture     | Diagnostic agreement rate, Concordance                             | 206          | 49.5       | 56.9         | 308         |                   |
| Giavina-Bianchi, et al, 2020 Nov | Retrospective Cohort           | Brazil      | N                | TD and F2F dermatologists via smartphone images                                                                           | Diagnostic agreement rate, Concordance                             | 17,233       | 71.4       | N/A          | 803         |                   |
| Goulart-Silveira et al, 2019     | Prospective Cohort             | Brazil      | N                | TD and F2F dermatologists via smartphone images acquired and stored via Telederma app                                     | Concordance                                                        | 39           | 69         | 68           | 39          |                   |
| Lamel, et al, 2012               | Prospective Cohort             | USA         | N                | TD and F2F dermatologists via smartphone images stored in ClickDerm                                                       | Diagnostic agreement rate, Concordance                             | 86           | 58.1       | 45.2         | 107         |                   |
| Senel, et al, 2013               | Prospective Cohort             | Turkey      | N                | TD and F2F dermatologists via digital photography and dermoscopy images                                                   | Concordance with and without dermoscopy                            | 150          | 49         | 55           | 150         |                   |
| Sola-Ortigosa, et al, 2020       | Prospective Cohort             | Spain       | N                | TD and F2F consults by the same dermatologist via dermoscopy and clinical images taken by digital photography and tablets | Diagnostic agreement rate, Concordance                             | 636          | 43.2       | 72.8         | 1,000       |                   |
| Tan, et al, 2010                 | Prospective Cohort             | New Zealand | Y                | TD and F2F consults by the same dermatologist via digital photography                                                     | Diagnostic agreement rate                                          | 200          | 63         | N/A          | 491         |                   |
| Vestergaard, et al, 2020         | Prospective Cohort             | Denmark     | N                | TD and F2F dermatologists via smartphone and dermoscopy images using FotoFinder Systems                                   | Diagnostic agreement rate, Concordance                             | 519          | 57         | 55           | 600         |                   |
| Warshaw, et al, 2015             | Prospective, Cross-sectional   | USA         | N                | TD and F2F dermatologists via digital photography and dermoscopy images                                                   | Diagnostic agreement rate, Concordance                             | 2,152        | 3.2        | 68           | 3,021       |                   |
| Zink, et al, 2017, Sept          | Prospective Cohort             | Germany     | Y                | TD and F2F dermatologists via smartphone and dermoscopy images using Handfotos                                            | Diagnostic agreement rate                                          | 26           | N/A        | N/A          | 26          |                   |
| Giavina-Bianchi, et al, 2020 Oct | Retrospective Cohort           | Brazil      | N                | TD and F2F dermatologists via smartphone images                                                                           | Diagnostic agreement rate, Concordance                             | 24,210       | 70         | N/A          | 739         | B.                |
| TD vs F2F Non-specialist         |                                |             |                  |                                                                                                                           |                                                                    |              |            |              |             |                   |
| Costello, et al, 2019            | Prospective, Cross-sectional   | USA         | Y                | TD and F2F PCP via smartphone and dermoscopy images using the Photo Exam app                                              | Diagnostic agreement rate                                          | 37           | 65         | 47.9         | 37          | All skin lesions  |
| Duong, et al, 2014               | Prospective, Observational     | France      | Y                | TD and F2F emergency physicians via smartphone images and videoconferences                                                | Diagnostic agreement rate (SFTD, video)                            | 194          | N/A        | N/A          | 178         |                   |
| Gonzalez-Coloma, et al, 2019     | Prospective, Cross-sectional   | Chile       | N                | TD and F2F PCP via clinical images                                                                                        | Diagnostic concordance                                             | 326          | 59         | 35.8         | 326         |                   |
| Keller, et al, 2020              | Prospective Cohort             | USA         | Y                | TD and F2F dermatologists or hospitalists on clinical images taken by smartphones and tablets                             | Diagnostic agreement rate, Concordance                             | 100          | 43.2       | N/A          | 100         |                   |
| Muir, et al, 2011                | Prospective Cohort             | Australia   | N                | TD and F2F emergency physicians via clinical images taken by digital photography                                          | Diagnostic agreement rate, Concordance                             | 60           | 65         | 47           | 60          |                   |
| Carter, et al, 2017              | Ambispective Cohort            | USA         | Y                | TD and F2F dermatologists, as well as F2F PCP via clinical images stored using Epic EHR software                          | Diagnostic agreement rate                                          | 79           | 74         | 47           | 79          | Skin cancers only |
| Jones, et al, 2021               | Retrospective Cohort           | New Zealand | Y                | TD and F2F PCP via digital photography and dermoscopy images                                                              | SSC matched for age, sex, and ethnicity. Diagnostic agreement rate | 481          | 64         | N/A          | 528         |                   |
| Piccoli, et al, 2015             | Retrospective, Cross-sectional | Brazil      | Y                | TD and F2F PCP via digital photography and dermoscopy images                                                              | Diagnostic concordance                                             | 184          | 73.4       | 54.7         | 184         |                   |
| Chen, et al, 2010                | Retrospective Cohort           | USA         | Y                | TD and F2F PCP via clinical images stored in Second Opinion Software                                                      | Diagnostic agreement rate                                          | 405          | 50.6       | 5.9          | 405         | B.                |
| Patro, et al 2015                | Prospective Cohort             | India       | Y                | TD and F2F PCP via digital photography                                                                                    | Diagnostic agreement rate                                          | 206          | 58.7       | N/A          | 206         |                   |

**eTable 1. Study and patient characteristics for all included studies.** The table is divided into two sections: one comparing teledermatology with Face-to-Face (F2F) dermatologists, and another comparing teledermatologists with F2F non-specialists. The studies are listed alphabetically and grouped by lesion type. \*See supplementary eTable 4 for agreement rates and concordance values. Abbreviations used in the table include B (Benign lesions only), ED (Emergency Department), EHR (Electronic Health Record), F2F (Face-to-Face), Histo



(Histopathology), ICD10 (International Classification of Diseases, 10th Edition), N (No), N/A (Not available), PCP (Primary Care Provider), PLD (Polarized Light Dermoscopy), RCT (Randomized Controlled Trial), SFTD (Store-and-Forward Teledermatology), SSC (Specialized Skin Clinic), TD (Teledermatology or Teledermatologist), and Y (Yes). Patient characteristics for all 44 included studies are also provided, grouped by lesion type, with a column describing special inclusion and exclusion criteria.

1  
2  
3  
4  
5  
6  
7  
8  
9  
10  
11  
12  
13  
14  
15  
16  
17  
18  
19  
20  
21  
22  
23  
24  
25  
26  
27  
28  
29  
30  
31  
32  
33  
34  
35  
36  
37  
38  
39  
40  
41  
42  
43  
44  
45  
46  
47

For peer review only

406

| Inclusion criteria                                                                                                                                                                   | Exclusion criteria                                                                                                                                                         |
|--------------------------------------------------------------------------------------------------------------------------------------------------------------------------------------|----------------------------------------------------------------------------------------------------------------------------------------------------------------------------|
| Primary articles assessing diagnostic agreement where store-and-forward technology or live video conference consults were compared with a control group who attend in-person visits. | Survey articles, feasibility studies, studies regarding other forms of telemedicine unrelated to dermatology, cost-effectiveness studies, editorials, and review articles. |
| Primarily comparing teledermatology to F2F, sometimes using histopathology as the reference standard.                                                                                | Studies that clearly stated they used telermatologists as the gold- or reference standard.                                                                                 |
|                                                                                                                                                                                      | Studies that only compared dermatoscopic images in the absence of clinical images.                                                                                         |
|                                                                                                                                                                                      | Studies where patients captured their own photographs.                                                                                                                     |

**eTable 2. Inclusion and exclusion criteria for screening of literature search results.**

F2F: Face-to-Face.

407

408

409

410

411

|                                                                                                                                                                                                                                                                                                                                                                                                                                                                                                                                                                                                                                                                                                                                                                                                                                |
|--------------------------------------------------------------------------------------------------------------------------------------------------------------------------------------------------------------------------------------------------------------------------------------------------------------------------------------------------------------------------------------------------------------------------------------------------------------------------------------------------------------------------------------------------------------------------------------------------------------------------------------------------------------------------------------------------------------------------------------------------------------------------------------------------------------------------------|
| <p><b>Study characteristics</b></p> <p>Author, year, title, study type, objective, country of publication. Patient characteristics: total number of participants included declaration of funding source, number of participants per study, mean age +/- SD, age range, gender, mean BMI and range, race/ethnicity, type of lesions evaluated, type of patients evaluated.</p>                                                                                                                                                                                                                                                                                                                                                                                                                                                  |
| <p><b>Methodology - teledermatology and F2F consults</b></p> <p>Method of correspondence, platform used for the teledermatology consult, training on teledermatology platform, length of teledermatology and F2F consult, experience of the teledermatologist and F2F physician, location of the teledermatologist, number of teledermatologists and F2F physicians who made a diagnosis for each patient, total number of telermatologists and F2F physicians in study, order of visits, wait time between teledermatology and F2F consult, whether same specialist conducted teledermatology and F2F visit, specialization of the F2F physician, number of reviews; qualifications of the individual who acquired the clinical photographs and whether they received additional training on taking clinical photographs.</p> |
| <p><b>Metrics and results</b></p> <p>Technology used for image acquisition and for viewing images with, distance between camera and lesion, number of images taken, use of teledermoscopy &amp; dermoscopy, brand of dermatoscope, use of histopathology, referral content provided to teledermatologist, primary and differential diagnoses agreement and concordance rates, diagnostic accuracy values (if available) such as sensitivity, specificity, PPV and NPV.</p>                                                                                                                                                                                                                                                                                                                                                     |

**eTable 3. Data extraction form with details of domains record.**

F2F: Face-to-Face, PPV: Positive Predictive Value, NPV: Negative Predictive Value.

412

413

| Author and Year          | Unique Study Grouping | Participants (n) | Lesions (N) | Primary Diagnosis Agreement F2F vs F2F (%) | Diagnosis Agreement (N) / Total Diagnoses (N) | Primary Diagnosis Agreement TD vs TD (%) | Diagnosis Agreement (N) / Total Diagnoses (N) | Primary Diagnosis Agreement TD vs F2F (%) | Diagnosis Agreement (N) / Total Diagnoses (N) | Primary Diagnosis Agreement TD vs Histo (%) | Diagnosis Agreement (N) / Total Diagnoses (N) | Primary Diagnosis Kappa Value TD vs F2F | Primary Diagnosis Kappa Value TD vs Histo |
|--------------------------|-----------------------|------------------|-------------|--------------------------------------------|-----------------------------------------------|------------------------------------------|-----------------------------------------------|-------------------------------------------|-----------------------------------------------|---------------------------------------------|-----------------------------------------------|-----------------------------------------|-------------------------------------------|
| Altieri et al, 2017 (A)  | F2F Derm vs TD1       | 232              | 232         |                                            |                                               |                                          |                                               | 58                                        | 93/160                                        |                                             |                                               | 0.51                                    |                                           |
| Altieri et al, 2017 (B)  | F2F Derm vs TD2       | 232              | 232         |                                            |                                               |                                          |                                               | 53                                        | 81/152                                        |                                             |                                               | 0.51                                    |                                           |
| Altieri et al, 2017 (C)  | F2F Derm vs TD3       | 232              | 232         |                                            |                                               |                                          |                                               | 53                                        | 80/152                                        |                                             |                                               | 0.57                                    |                                           |
| Azfar et al, 2014 (A)    | F2F Derm vs TD1       | 76               | 159         |                                            |                                               |                                          |                                               | 47                                        | 63/136                                        |                                             |                                               | 0.41                                    |                                           |
| Azfar et al, 2014 (B)    | F2F Derm vs TD2       | 76               | 159         |                                            |                                               |                                          |                                               | 57                                        | 77/136                                        |                                             |                                               | 0.51                                    |                                           |
| Azfar et al, 2014 (C)    | F2F Derm vs TD3       | 76               | 159         |                                            |                                               |                                          |                                               | 49                                        | 66/136                                        |                                             |                                               | 0.43                                    |                                           |
| Barbieri et al, 2014 (A) | F2F Derm vs TD1       | 50               | 50          |                                            |                                               | 58                                       | 29/50                                         | 64                                        | 32/50                                         |                                             |                                               |                                         |                                           |
| Barbieri et al, 2014 (B) | F2F Derm vs TD2       | 50               | 50          |                                            |                                               |                                          |                                               | 56                                        | 28/50                                         |                                             |                                               |                                         |                                           |
| Barcaui et al, 2018      | F2F Derm vs TD        | 31               | 41          |                                            |                                               |                                          |                                               | 90                                        | 37/41                                         |                                             |                                               |                                         |                                           |
| Batalla, 2016            | F2F Derm vs TD        | 183              | 183         |                                            |                                               |                                          |                                               | 55                                        | 36/65                                         |                                             |                                               |                                         |                                           |
| Borve et al, 2012 (A)    | F2F Derm vs TD1       | 40               | 40          | 88                                         | 35/40                                         | 68                                       | 27/40                                         | 78                                        | 31/40                                         |                                             |                                               |                                         |                                           |
| Borve et al, 2012 (B)    | F2F Derm vs TD2       | 40               | 40          |                                            |                                               |                                          |                                               | 78                                        | 31/40                                         |                                             |                                               |                                         |                                           |

1  
2  
3  
4  
5  
6  
7  
8  
9  
10  
11  
12  
13  
14  
15  
16  
17  
18  
19  
20  
21  
22  
23  
24  
25  
26  
27  
28  
29  
30  
31  
32  
33  
34  
35  
36  
37  
38  
39  
40  
41  
42  
43  
44  
45  
46  
47

|                                 |                                                          |       |       |    |       |    |         |    |        |           |
|---------------------------------|----------------------------------------------------------|-------|-------|----|-------|----|---------|----|--------|-----------|
| Borve et al, 2013 (A)           | F2F Derm vs TD1                                          | 62    | 69    | 58 | 40/69 | 55 | 38/69   |    | 0.47   | 0.51      |
| Borve et al, 2013 (B)           | F2F Derm vs TD2                                          | 62    | 69    |    |       | 57 | 39/69   |    | 0.48   |           |
| Carter et al, 2017 (A)          | F2F nonspecialist vs TD                                  | 79    | 79    | 38 | 30/79 | 14 | 11/79   |    |        |           |
| Carter et al, 2017 (B)          | F2F Derm vs TD                                           | 79    | 79    |    |       | 38 | 30/79   |    |        |           |
| Chen et al, 2010                | F2F nonspecialist vs TD                                  | 405   | 405   |    |       | 48 | 194/405 |    |        |           |
| Clarke et al, 2021              | F2F Derm vs TD                                           | 206   | 308   |    |       | 67 | 205/308 | 65 | 40/62  | 0.6       |
| Costello et al, 2020            | F2F nonspecialist vs TD                                  | 37    | 37    |    |       | 32 | 12/37   |    |        |           |
| Duong et al, 2014 (A)           | F2F nonspecialist vs TD (Videoconference)                | 111   | 110   |    |       | 65 | 44/68   |    |        |           |
| Duong et al, 2014 (B)           | F2F nonspecialist vs TD (SFTD)                           | 111   | 110   |    |       | 31 | 34/110  |    |        |           |
| Gabel et al, 2021               | F2F Derm vs TD                                           | 41    | 41    |    |       | 67 | 27/41   |    |        | 0.33      |
| Gatica, 2015                    | F2F Derm vs TD                                           | 125   | 125   |    |       | 82 | 103/125 |    |        |           |
| Gerhardt et al, 2021            | F2F Derm vs TD                                           | 809   | 809   |    |       | 75 | 60/809  |    |        |           |
| Giavina-Bianchi et al, Nov 2020 | F2F Derm vs TD                                           | 17233 | 17233 |    |       | 61 | 490/803 | 54 | 156/89 | 0.21 0.09 |
| Giavina-Bianchi et al, Oct 2020 | F2F Derm vs TD                                           | 24210 | 27519 |    |       | 78 | 576/739 |    |        | 0.74      |
| Gonzalez-Coloma, 2019           | F2F nonspecialist vs TD                                  | 326   | 326   |    |       |    |         |    |        | 0.5       |
| Goulart-Silveira, et al, 2019   | F2F Derm vs TD                                           | 39    | 39    |    |       |    |         |    |        | 0.96 0.56 |
| Jones et al, 2021               | F2F nonspecialist vs TD (Suspicious Skin Cancer pathway) | NA    | 528   |    |       | 35 | 183/528 | 53 | 60/114 |           |
| Keller et al, 2020 (A)          | F2F nonspecialist vs TD                                  | 100   | 100   |    |       | 45 | 24/53   |    |        | 0.4       |
| Keller et al, 2020 (B)          | F2F Derm vs TD                                           | 100   | 100   |    |       | 53 | 28/53   |    |        | 0.45      |
| Lamel et al, 2012               | F2F Derm vs TD                                           | 86    | 107   |    |       | 62 | 66/107  |    |        | 0.6       |

|                                 |                                             |     |     |    |         |    |         |         |         |           |
|---------------------------------|---------------------------------------------|-----|-----|----|---------|----|---------|---------|---------|-----------|
| Marchell et al, 2017            | F2F Derm vs TD (SFTD)                       | 216 | 216 | 91 | 122/134 |    | 76      | 162/213 |         |           |
| Marchell et al, 2017            | F2F Derm vs TD (Uncompressed video)         | 216 | 216 |    |         |    | 76      | 77/101  |         |           |
| Marchell et al, 2017            | F2F Derm vs TD (Compressed video)           | 216 | 216 |    |         |    | 72      | 81/112  |         |           |
| Muir et al, 2011 (A)            | F2F nonspecialist vs TD                     | 60  | 60  |    |         |    | 72      | 43/60   | 0.42    |           |
| Muir et al, 2011 (B)            | F2F Derm vs TD                              | 60  | 60  |    |         |    | 98      | 49/50   | 0.93    |           |
| Nami et al, 2015                | F2F Derm vs TD                              | 391 | 391 |    |         |    | 91      | 356/391 | 0.91    |           |
| Okita et al, 2016               | F2F Derm vs TD                              | 100 | 100 |    |         |    | 54      | 54/100  |         |           |
| Patro et al, 2015               | F2F nonspecialist vs TD                     | 206 | 206 |    |         |    | 56      | 115/206 |         |           |
| Piccoli, et al, 2014            | F2F nonspecialist vs TD                     | 184 | 184 |    |         |    |         |         | 0.69    |           |
| Ribas et al, 2010               | F2F Derm vs TD                              | 174 | 174 | 83 | 145/174 | 81 | 141/174 | 82      | 142/174 | 0.8       |
| Rios-Yuil, 2012                 | F2F Derm vs TD                              | 30  | 30  |    |         |    | 83      | 25/30   | 67      | 0.65      |
| Romero Aguilera et al, 2014 (A) | F2F Derm vs TD1                             | 457 | 192 |    |         | 69 | 118/170 | 73      | 124/170 |           |
| Romero Aguilera et al, 2014 (B) | F2F Derm vs TD2                             | 457 | 192 |    |         | 73 | 124/170 | 72      | 123/170 |           |
| Romero Aguilera et al, 2014 (C) | F2F Derm vs TD3                             | 457 | 192 |    |         | 67 | 114/170 | 88      | 150/170 |           |
| Romero et al, 2010 (A)          | F2F Derm vs TD (SFTD)                       | 457 | 192 |    |         |    | 88      | 325/368 |         |           |
| Romero et al, 2010 (B)          | F2F Derm vs TD (SFTD and videoconferencing) | 457 | 176 |    |         |    | 85      | 314/368 |         |           |
| Rubegni et al, 2011             | F2F Derm vs TD                              | 130 | 130 |    |         |    | 88      | 114/130 |         | 0.86      |
| Saleh et al, 2017               | F2F Derm vs TD                              | 600 | 600 |    |         | 88 | 526/600 | 81      | 488/600 | 0.46-0.52 |
| Senel, et al, 2013              | F2F Derm vs TD1 (no dermoscopy)             | 150 | 150 |    |         |    |         |         |         | 0.77      |
| Senel, et al, 2013              | F2F Derm vs TD2 (no dermoscopy)             | 150 | 150 |    |         |    |         |         |         | 0.75      |

1  
2  
3  
4  
5  
6  
7  
8  
9  
10  
11  
12  
13  
14  
15  
16  
17  
18  
19  
20  
21  
22  
23  
24  
25  
26  
27  
28  
29  
30  
31  
32  
33  
34  
35  
36  
37  
38  
39  
40  
41  
42  
43  
44  
45  
46  
47

|                               |                                                            |      |      |    |    |    |    |          |           |         |
|-------------------------------|------------------------------------------------------------|------|------|----|----|----|----|----------|-----------|---------|
| Senel, et al, 2013            | F2F Derm vs TD1 (dermoscopy)                               | 150  | 150  |    |    |    |    |          |           | 0.85    |
| Senel, et al, 2013            | F2F Derm vs TD2 (dermoscopy)                               | 150  | 150  |    |    |    |    |          |           | 0.86    |
| Sola-Ortigosa et al, 2020 (A) | F2F Derm vs TD1 (no dermoscopy)                            | 636  | 1000 | 82 | 00 | 88 | 0  | 821/1000 | 875/1000  | 0.87    |
| Sola-Ortigosa et al, 2020 (B) | F2F Derm vs TD2 (no dermoscopy)                            | 636  | 1000 | 83 | 00 | 84 | 0  | 832/1000 | 835/1000  | 0.83    |
| Sola-Ortigosa et al, 2020 (C) | F2F Derm vs TD3 (no dermoscopy)                            | 636  | 1000 | 81 | 00 | 88 | 0  | 813/1000 | 884/1000  | 0.89    |
| Sola-Ortigosa et al, 2020 (D) | F2F Derm vs TD1 (dermoscopy)                               | 636  | 1000 | 92 | 00 | 92 | 0  | 915/1000 | 915/1000  | 0.91    |
| Sola-Ortigosa et al, 2020 (E) | F2F Derm vs TD2 (dermoscopy)                               | 636  | 1000 | 90 | 00 | 91 | 0  | 902/1000 | 912/1000  | 0.9     |
| Sola-Ortigosa et al, 2020 (F) | F2F Derm vs TD3 (dermoscopy)                               | 636  | 1000 | 90 | 00 | 90 | 0  | 899/1000 | 903/1000  | 0.89    |
| Tan et al, 2010 (A)           | F2F Derm vs TD1, F2F Derm 1 vs F2F Derm 2                  | 200  | 491  | 82 | 91 | 72 | 1  | 157/491  | 355/491   |         |
| Tan et al, 2010 (B)           | F2F Derm vs TD2, F2F Derm 2 vs F2F Derm 3                  | 200  | 491  | 76 | 6  |    |    | 80/491   |           |         |
| Tan et al, 2010 (C)           | F2F Derm 1 vs F2F Derm 3                                   | 200  | 491  | 76 | 94 |    |    | 147/491  |           |         |
| Tran et al, 2011              | F2F Derm vs TD                                             | 30   | 30   |    |    |    |    |          | 75/30     |         |
| Vano-Galvan et al, 2011       | F2F Derm vs TD                                             | 100  | 100  |    |    |    |    |          | 1381/2000 |         |
| Vestergaard et al, 2020 (A)   | A F2F Derm vs TD1                                          | 519  | 600  | 62 | 0  | 62 | 58 | 370/600  | 372/600   | 170/292 |
| Vestergaard et al, 2020 (B)   | F2F Derm vs TD2                                            | 519  | 600  |    |    | 60 | 54 |          | 361/600   | 157/292 |
| Warshaw et al, 2015 (A)       | F2F Derm vs TD (non biopsied pigmented lesions, Macro)     | 2152 | 3021 |    |    |    |    |          | 570/753   | 0.56    |
| Warshaw et al, 2015 (B)       | F2F Derm vs TD (non biopsied pigmented lesions, Macro+PLD) | 2152 | 3021 |    |    |    |    |          | 566/752   | 0.56    |
| Warshaw et al, 2015 (C)       | F2F Derm vs TD (non biopsied pigmented lesions, Macro+PLD) | 2152 | 3021 |    |    |    |    |          | 548/684   | 0.62    |

|                            |                                                              |      |      |    |              |                   |
|----------------------------|--------------------------------------------------------------|------|------|----|--------------|-------------------|
| Warshaw et al, 2015 (D)    | F2F Derm vs TD (biopsied pigmented lesions, Macro)           | 2152 | 3021 | 53 | 344/651      | 0.44              |
| Warshaw et al, 2015 (E)    | F2F Derm vs TD (biopsied pigmented lesions, Macro+PLD)       | 2152 | 3021 | 53 | 348/652      | 0.45              |
| Warshaw et al, 2015 (F)    | F2F Derm vs TD (biopsied pigmented lesions, Macro+PLD)       | 2152 | 3021 | 60 | 357/595      | 0.52              |
| Warshaw et al, 2015 (G)    | F2F Derm vs TD (NONbiopsied NONpigmented lesions, Macro)     | 2152 | 3021 | 52 | 300/583      | 0.38              |
| Warshaw et al, 2015 (H)    | F2F Derm vs TD (NONbiopsied NONpigmented lesions, Macro+PLD) | 2152 | 3021 | 50 | 291/579      | 0.38              |
| Warshaw et al, 2015 (I)    | F2F Derm vs TD (biopsied NONpigmented lesions, Macro)        | 2152 | 3021 | 46 | 473/103<br>4 | 0.32              |
| Warshaw et al, 2015 (J)    | F2F Derm vs TD (biopsied NONpigmented lesions, Macro+PLD)    | 2152 | 3021 | 50 | 511/102<br>0 | 0.37              |
| Zanini, 2013               | F2F Derm vs TD                                               | 100  | 100  | 76 | 76/100       |                   |
| Zink et al, 2017, July (A) | F2F Derm vs TD                                               | 195  | 195  | 59 | 115/195      | 56<br>108/1<br>95 |
| Zink et al, 2017, Sept (B) | F2F Derm vs TD                                               | 26   | 26   | 92 | 24/26        | 67<br>17/26       |

**eTable 4. Included unique study groupings and letter codes for individual agreement rates and kappa concordance values.** The abbreviations used in the text are as follows: TD (Teledermatology or Teledermatologist), Derm (Dermatologist), F2F (Face-to-Face), SFTD (Store and Forward Technology), PLD (Polarized Light Dermoscopy), and Macro (Macroscopic clinical images).



| Study ID                  | Journal                                                                                           | Reason For Exclusion |
|---------------------------|---------------------------------------------------------------------------------------------------|----------------------|
| NCT03034694, 2016         | <a href="http://ClinicalTrials.gov">ClinicalTrials.gov</a>                                        | Wrong study design   |
| Andersson et al, 2017     | Lakartidningen                                                                                    | Wrong study design   |
| Romero et al, 2018        | Actas dermo-sifiliograficas                                                                       | Wrong study design   |
| Orruno et al, 2016        | Health Technology Assessment Database                                                             | Wrong study design   |
| Batalla et al, 2016       | Piel                                                                                              | Wrong study design   |
| Kroemer et al, 2011       | British Journal of Dermatology                                                                    | Wrong study design   |
| Ernstberger et al, 2014   | Zentralblatt fur Chirurgie                                                                        | Wrong study design   |
| Totty et al, 2018         | Journal of wound care                                                                             | Wrong study design   |
| Wurm et al, 2013          | Journal of Telemedicine and Telecare                                                              | Wrong study design   |
| Wang et al, 2017          | Telemedicine journal and e-health : the official journal of the American Telemedicine Association | Wrong study design   |
| Singh et al, 2011         | Australasian Journal of Dermatology                                                               | Wrong study design   |
| Grey et al, 2017          | Dermatitis                                                                                        | Wrong study design   |
| Crompton et al, 2010      | Journal of Visual Communication in Medicine                                                       | Wrong study design   |
| Ali et al, 2021           | JMIR formative research                                                                           | Wrong study design   |
| Boyce et al, 2011         | Dermatology                                                                                       | Wrong study design   |
| Berg et al, 2017          | Sarcoidosis Vasculitis and Diffuse Lung Diseases                                                  | Wrong study design   |
| Shin et al, 2014          | Journal of telemedicine and telecare                                                              | Wrong study design   |
| Gacto-Sanchez et al, 2020 | Burns : journal of the International Society for Burn Injuries                                    | Wrong study design   |
| Tian et al, 2017          | Journal of Cosmetic Dermatology                                                                   | Wrong study design   |
| Thind et al, 2011         | Clinical and Experimental Dermatology                                                             | Wrong study design   |
| Silveira et al, 2014      | BMC Dermatology                                                                                   | Wrong study design   |
| O'Connor et al, 2017      | JAMA Dermatology                                                                                  | Wrong study design   |
| Janda et al, 2020         | The Lancet. Digital health                                                                        | Wrong study design   |
| Day et al, 2020           | Military medicine                                                                                 | Wrong study design   |
| Karlsson et al, 2015      | Acta Dermato-Venereologica                                                                        | Wrong study design   |
| Seghers et al, 2015       | Australasian Journal of Dermatology                                                               | Wrong study design   |
| Hazenberget al, 2010      | Journal of Medical Engineering and Technology                                                     | Wrong study design   |
| Borve et al, 2015         | Acta Dermato-Venereologica                                                                        | Wrong study design   |
| Boissin et al, 2015       | Burns                                                                                             | Wrong study design   |
| Da Silva et al, 2018      | Dermatology online journal                                                                        | Wrong study design   |
| Devrim et al, 2019        | BMC pediatrics                                                                                    | Wrong study design   |
| Danielsson et al, 2016    | Health Technology Assessment Database                                                             | Wrong study design   |
| Berglund et al, 2020      | Journal of the European Academy of Dermatology and Venereology : JEADV                            | Wrong study design   |
| Forsblom et al, 2013      | Clinical Infectious Diseases                                                                      | Wrong study design   |
| G Bianchi et al, 2020     | Journal of medical Internet research                                                              | Wrong study design   |
| Congalton et al, 2015     | Journal of the European Academy of Dermatology and Venereology                                    | Wrong study design   |
| Ferrandiz et al, 2012     | Archives of Dermatology                                                                           | Wrong study design   |
| Ismail et al, 2018        | International Journal of Women's Dermatology                                                      | Wrong study design   |
| Gamus et al, 2019         | International journal of medical informatics                                                      | Wrong study design   |
| Paudel et al, 2020        | Case reports in dermatological medicine                                                           | Wrong study design   |
| Georgesesen et al, 2020   | Telemedicine journal and e-health : the official journal of the American Telemedicine Association | Wrong study design   |
| Gagnon et al, 2015        | Dermatology Times                                                                                 | Wrong study design   |
| Philp et al, 2013         | Pediatric Dermatology                                                                             | Wrong study design   |
| Mooney et al, 2011        | Skin Research and Technology                                                                      | Wrong study design   |
| Do Khac et al, 2021       | JMIR mHealth and uHealth                                                                          | Wrong study design   |
| Chambers et al, 2012      | Journal of the American Academy of Dermatology                                                    | Wrong study design   |
| Garcia-Romero et al, 2011 | Telemedicine journal and e-health : the official journal of the American Telemedicine Association | Wrong study design   |
| Ahmed et al, 2020         | Annals of internal medicine                                                                       | Wrong study design   |
| Marwaha et al, 2019       | Journal of the American Academy of Dermatology                                                    | Wrong study design   |
| NCT02122432, 2014         | <a href="http://ClinicalTrials.gov">ClinicalTrials.gov</a>                                        | Wrong study design   |
| Lowe et al, 2021          | Clinical and experimental dermatology                                                             | Wrong study design   |

|    |                               |                                                                                                                            |                                         |
|----|-------------------------------|----------------------------------------------------------------------------------------------------------------------------|-----------------------------------------|
| 1  |                               |                                                                                                                            |                                         |
| 2  |                               |                                                                                                                            |                                         |
| 3  | Bowling et al, 2011           | Wound Repair and Regeneration                                                                                              | Wrong study design                      |
| 4  | Marin-Gomez et al, 2020       | Journal of primary care & community health                                                                                 | Wrong study design                      |
| 5  | Veronese et al, 2021          | Diagnostics (Basel, Switzerland)                                                                                           | Wrong study design                      |
| 6  | Ismail et al, 2018            | International journal of dermatology                                                                                       | Wrong study design                      |
| 7  | NCT02905851, 2016             | <a href="http://ClinicalTrials.gov">ClinicalTrials.gov</a>                                                                 | Wrong study design                      |
| 8  | Trinidad et al, 2020          | Journal of the American Academy of Dermatology                                                                             | Wrong study design                      |
| 9  | Tensen et al, 2019            | Studies in health technology and informatics                                                                               | Wrong study design                      |
| 10 | Karavan et al, 2014           | Journal of telemedicine and telecare                                                                                       | Wrong study design                      |
| 11 | Viola et al, 2011             | Archives of Dermatology                                                                                                    | Wrong study design                      |
| 12 | van Netten et al, 2017        | Scientific reports                                                                                                         | Wrong study design                      |
| 13 | Cai et al, 2016               | Burns : journal of the International Society for Burn Injuries                                                             | Wrong study design                      |
| 14 | Hazenberget al, 2010          | Diabetes Technology and Therapeutics                                                                                       | Wrong study design                      |
| 15 | Jacoby et al, 2021            | Journal of drugs in dermatology : JDD                                                                                      | Wrong study design                      |
| 16 | Pak et al, 2018               | Wound repair and regeneration : official publication of the Wound Healing Society [and] the European Tissue Repair Society | Wrong study design                      |
| 17 |                               |                                                                                                                            |                                         |
| 18 | Kummerow Broman et al, 2019   | JAMA surgery                                                                                                               | Wrong study design                      |
| 19 |                               |                                                                                                                            |                                         |
| 20 | Munoz-Lopez et al, 2021       | Journal of the European Academy of Dermatology and Venereology : JEADV                                                     | Wrong study design                      |
| 21 | Markun et al, 2017            | Medicine                                                                                                                   | Wrong study design                      |
| 22 | Piette et al, 2017            | Journal of telemedicine and telecare                                                                                       | Wrong study design                      |
| 23 | Tan et al, 2010               | British Journal of Dermatology                                                                                             | Wrong study design                      |
| 24 | Watson et al, 2010            | Archives of Dermatology                                                                                                    | Wrong study design                      |
| 25 | Wiseman et al, 2016           | Journal of vascular surgery. Venous and lymphatic disorders                                                                | Wrong study design                      |
| 26 | Wolf et al, 2013              | JAMA dermatology                                                                                                           | Wrong study design                      |
| 27 | Laggis et al, 2020            | The American Journal of dermatopathology                                                                                   | Wrong study design                      |
| 28 | Kazi et al, 2021              | Telemedicine journal and e-health : the official journal of the American Telemedicine Association                          | Wrong study design                      |
| 29 | Kanthraj et al, 2013          | Indian Journal of Dermatology, Venereology and Leprology                                                                   | Wrong study design                      |
| 30 | Shah et al, 2016              | Journal of the American Academy of Dermatology                                                                             | Wrong study design                      |
| 31 | Kim et al, 2018               | Skin research and technology                                                                                               | Wrong study design                      |
| 32 | Nguyen et al, 2017            | Journal of Clinical and Aesthetic Dermatology                                                                              | Wrong study design                      |
| 33 | Rizvi et al, 2020             | PloS one                                                                                                                   | Wrong study design                      |
| 34 | Mehrtens et al, 2019          | Clinical and experimental dermatology                                                                                      | Wrong study design                      |
| 35 | Knudsen et al, 2012           | Lakartidningen                                                                                                             | Research letter or letter to the editor |
| 36 | Korman et al, 2020            | Journal of the American Academy of Dermatology                                                                             | Research letter or letter to the editor |
| 37 | Mercer et al, 2014            | Journal of Cutaneous Medicine and Surgery                                                                                  | Research letter or letter to the editor |
| 38 | Grunig et al, 2015            | JAMA Dermatology                                                                                                           | Research letter or letter to the editor |
| 39 | Cartron et al, 2020           | Dermatologic therapy                                                                                                       | Research letter or letter to the editor |
| 40 | McAfee et al, 2020            | Journal of the American Academy of Dermatology                                                                             | Research letter or letter to the editor |
| 41 | Wong et al, 2021              | JAMA dermatology                                                                                                           | Research letter or letter to the editor |
| 42 | Baranowski et al, 2020        | Journal of the American Academy of Dermatology                                                                             | Research letter or letter to the editor |
| 43 | Micheletti et al, 2014        | Journal of the American Academy of Dermatology                                                                             | Research letter or letter to the editor |
| 44 | Osei-Tutu et al, 2013         | Journal of the American Academy of Dermatology                                                                             | Research letter or letter to the editor |
| 45 | Nair et al, 2015              | International Journal of Dermatology                                                                                       | Research letter or letter to the editor |
| 46 | Miller et al, 2021            | Journal of the American Academy of Dermatology                                                                             | Research letter or letter to the editor |
| 47 | Keleshian et al, 2017         | Journal of the American Academy of Dermatology                                                                             | Research letter or letter to the editor |
| 48 | HAYES; Inc et al, 2016        | Health Technology Assessment Database                                                                                      | Research letter or letter to the editor |
| 49 | Jacob et al, 2017             | Journal of telemedicine and telecare                                                                                       | Research letter or letter to the editor |
| 50 | Perkins et al, 2020           | Journal of the American Academy of Dermatology                                                                             | Research letter or letter to the editor |
| 51 | Halpern et al, 2010           | British Journal of Dermatology                                                                                             | Research letter or letter to the editor |
| 52 | Newman et al, 2020            | Journal of the American Academy of Dermatology                                                                             | Research letter or letter to the editor |
| 53 | Hunt et al, 2020              | Clinical and experimental dermatology                                                                                      | Research letter or letter to the editor |
| 54 | 2018                          | Nursing                                                                                                                    | Research letter or letter to the editor |
| 55 | Taneja et al, 2021            | Indian journal of dermatology, venereology and leprology                                                                   | Research letter or letter to the editor |
| 56 | Echeverria-Garcia et al, 2019 | Actas dermo-sifilograficas                                                                                                 | Research letter or letter to the editor |
| 57 | Henning et al, 2010           | Archives of Dermatology                                                                                                    | Research letter or letter to the editor |

1  
2  
3  
4  
5  
6  
7  
8  
9  
10  
11  
12  
13  
14  
15  
16  
17  
18  
19  
20  
21  
22  
23  
24  
25  
26  
27  
28  
29  
30  
31  
32  
33  
34  
35  
36  
37  
38  
39  
40  
41  
42  
43  
44  
45  
46  
47  
48  
49  
50  
51  
52  
53  
54  
55  
56  
57  
58  
59  
60

|                             |                                                                        |                                         |
|-----------------------------|------------------------------------------------------------------------|-----------------------------------------|
| Demo et al, 2019            | Clinical and experimental dermatology                                  | Research letter or letter to the editor |
| Byamba et al, 2015          | British Journal of Dermatology                                         | Research letter or letter to the editor |
| Gupta et al, 2020           | Journal of the American Academy of Dermatology                         | Research letter or letter to the editor |
| De Giorgi et al, 2017       | Journal of the European Academy of Dermatology and Venereology         | Research letter or letter to the editor |
| Duong et al, 2016           | Annales de Dermatologie et de Venereologie                             | Research letter or letter to the editor |
| Mortimer et al, 2021        | Journal of the American Academy of Dermatology                         | Research letter or letter to the editor |
| Gravelly et al, 2010        | Journal of the American Academy of Dermatology                         | Research letter or letter to the editor |
| Choi et al, 2021            | International journal of dermatology                                   | Research letter or letter to the editor |
| Motley et al, 2012          | BMJ: British Medical Journal (Clinical Research Edition)               | Research letter or letter to the editor |
| Leavitt et al, 2016         | Journal of the American Academy of Dermatology                         | Research letter or letter to the editor |
| Cheng et al, 2020           | Dermatitis : contact, atopic, occupational, drug                       | Research letter or letter to the editor |
| Clark et al, 2021           | Journal of the American Academy of Dermatology                         | Research letter or letter to the editor |
| Fuesl et al, 2010           | MMW-Fortschritte der Medizin                                           | Research letter or letter to the editor |
| English III et al, 2013     | Journal of the American Academy of Dermatology                         | Research letter or letter to the editor |
| Cotes et al, 2021           | Journal of the American Academy of Dermatology                         | Research letter or letter to the editor |
| Abi Rafeh et al, 2021       | Journal of cutaneous medicine and surgery                              | Research letter or letter to the editor |
| Okeke et al, 2020           | The Journal of dermatological treatment                                | Research letter or letter to the editor |
| Splete et al, 2014          | Emergency Medicine (00136654)                                          | Research letter or letter to the editor |
| Khosravi et al, 2021        | Clinical and experimental dermatology                                  | Research letter or letter to the editor |
| Sivesind et al, 2021        | Journal of the American Academy of Dermatology                         | Research letter or letter to the editor |
| Stoecker et al, 2013        | JAMA dermatology                                                       | Research letter or letter to the editor |
| Skayem et al, 2020          | Journal of the European Academy of Dermatology and Venereology : JEADV | Research letter or letter to the editor |
| Su et al, 2020              | Journal of the American Academy of Dermatology                         | Research letter or letter to the editor |
| Massone et al, 2021         | Anais brasileiros de dermatologia                                      | Research letter or letter to the editor |
| Li et al, 2021              | The Journal of infection                                               | Research letter or letter to the editor |
| Afanasiev et al, 2021       | Journal of the American Academy of Dermatology                         | Research letter or letter to the editor |
| Varma et al, 2011           | British Journal of Dermatology                                         | Research letter or letter to the editor |
| Van Der Heijden et al, 2010 | Journal of the European Academy of Dermatology and Venereology         | Research letter or letter to the editor |
| Motley et al, 2012          | BMJ (Online)                                                           | Research letter or letter to the editor |
| Villani et al, 2020         | Dermatologic therapy                                                   | Research letter or letter to the editor |
| Portnoy et al, 2018         | The journal of allergy and clinical immunology. In practice            | Research letter or letter to the editor |
| Tschandl et al, 2018        | British Journal of Dermatology                                         | Research letter or letter to the editor |
| Poolworaluk et al, 2020     | Future healthcare journal                                              | Research letter or letter to the editor |
| Anonymous et al, 2020       | Journal of drugs in dermatology : JDD                                  | Research letter or letter to the editor |
| Tan et al, 2021             | Annals of the Academy of Medicine, Singapore                           | Research letter or letter to the editor |
| Silva et al, 2021           | Anais brasileiros de dermatologia                                      | Research letter or letter to the editor |
| de Giorgi et al, 2016       | International Journal of Dermatology                                   | Wrong outcomes                          |
| Senel et al, 2014           | Journal of telemedicine and telecare                                   | Wrong outcomes                          |
| Goodier et al, 2021         | Contact dermatitis                                                     | Wrong outcomes                          |
| Foolad et al, 2017          | International Journal of Dermatology                                   | Wrong outcomes                          |
| Wells et al, 2020           | The Journal of clinical and aesthetic dermatology                      | Wrong outcomes                          |
| Arzberger et al, 2016       | Acta Dermato-Venereologica                                             | Wrong outcomes                          |
| Creighton-Smith et al, 2017 | International Journal of Dermatology                                   | Wrong outcomes                          |
| Marwaha et al, 2019         | Journal of the American Academy of Dermatology                         | Wrong outcomes                          |
| Pasquali et al, 2021        | Actas dermo-sifiliograficas                                            | Wrong outcomes                          |
| Vestergaard et al, 2020     | Family practice                                                        | Wrong outcomes                          |
| Kravets et al, 2018         | Acta dermatovenerologica Alpina, Pannonica, et Adriatica               | Wrong outcomes                          |
| Speiser et al, 2014         | American Journal of Dermatopathology                                   | Wrong outcomes                          |
| N/A                         | Journal of the American Academy of Dermatology                         | Wrong outcomes                          |
| Whited et al, 2013          | Journal of Telemedicine and Telecare                                   | Wrong outcomes                          |

|    |                                   |                                                                                                           |                                           |
|----|-----------------------------------|-----------------------------------------------------------------------------------------------------------|-------------------------------------------|
| 1  |                                   |                                                                                                           |                                           |
| 2  |                                   |                                                                                                           |                                           |
| 3  | Abhishek et al, 2021              | medRxiv                                                                                                   | Wrong outcomes                            |
| 4  | Villa et al, 2020                 | Internal and emergency medicine                                                                           | Wrong outcomes                            |
| 5  | Lubeek et al, 2016                | Tijdschrift voor gerontologie en geriatrie                                                                | review                                    |
| 6  | Ndegwa et al, 2016                | Health Technology Assessment Database                                                                     | review                                    |
| 7  | Moreno-Ramirez et al, 2017        | Acta dermato-venereologica                                                                                | review                                    |
| 8  | Moreno-Ramirez et al, 2017        | Acta Dermato-Venereologica                                                                                | review                                    |
| 9  | Van Der Heijden et al, 2010       | Huisarts en Wetenschap                                                                                    | review                                    |
| 10 | Walocko et al, 2017               | Dermatologic Clinics                                                                                      | review                                    |
| 11 | Roman et al, 2014                 | Journal of the Dermatology Nurses' Association                                                            | review                                    |
| 12 | Hart et al, 2011                  | Telemedicine journal and e-health : the official journal of the American Telemedicine Association         | review                                    |
| 13 | Elsner et al, 2020                | Journal der Deutschen Dermatologischen Gesellschaft = Journal of the German Society of Dermatology : JDDG | review                                    |
| 14 | Kaliyadan et al, 2020             | Indian journal of dermatology                                                                             | review                                    |
| 15 | Burch et al,                      |                                                                                                           | review                                    |
| 16 | Evans et al, 2017                 | Pharmazeutische Zeitung                                                                                   | Editorial                                 |
| 17 | Anonymous. et al, 2016            | Journal of AHIMA / American Health Information Management Association                                     | Editorial                                 |
| 18 | Luk et al, 2018                   | Hong Kong Journal of Dermatology and Venereology                                                          | Editorial                                 |
| 19 | Queen et al, 2018                 | International wound journal                                                                               | Editorial                                 |
| 20 | Anguita et al, 2014               | Nurse Prescribing                                                                                         | Editorial                                 |
| 21 | Haworth et al, 2020               | Clinical and experimental dermatology                                                                     | Editorial                                 |
| 22 | Romero-Aguilera et al, 2019       | Actas dermo-sifiliograficas                                                                               | Editorial                                 |
| 23 | Barrio Garde et al, 2016          | Piel                                                                                                      | Editorial                                 |
| 24 | Morand et al, 2010                | Annales de dermatologie et de venereologie                                                                | Editorial                                 |
| 25 | N/A                               | Journal of the American Academy of Dermatology                                                            | Abstract                                  |
| 26 | N/A                               | Journal of the American Academy of Dermatology                                                            | Abstract                                  |
| 27 | Bianchi et al, 2020               | Journal of the American Academy of Dermatology                                                            | Abstract                                  |
| 28 | Creadore et al, 2020              | Journal of the American Academy of Dermatology                                                            | Abstract                                  |
| 29 | N/A                               | Journal of the American Academy of Dermatology                                                            | Abstract                                  |
| 30 | Tognetti L et al, 2020            |                                                                                                           | Abstract                                  |
| 31 | SPLATE et al, 2014                | Emergency Medicine (00136654)                                                                             | Abstract                                  |
| 32 | N/A                               | Journal of the American Academy of Dermatology                                                            | Abstract                                  |
| 33 | Dahlen Gyllencreutz et al, 2017   | Journal of the European Academy of Dermatology and Venereology                                            | Wrong intervention                        |
| 34 | Tandjung et al, 2015              | Journal of Evaluation in Clinical Practice                                                                | Wrong intervention                        |
| 35 | Paradela-De-La-Morena et al, 2015 | European Journal of Dermatology                                                                           | Wrong intervention                        |
| 36 | Horsham et al, 2015               | British Journal of Dermatology                                                                            | Wrong intervention                        |
| 37 | Saenz et al, 2018                 | International Journal of Telemedicine and Applications                                                    | Wrong intervention                        |
| 38 | Kochmann et al, 2016              | Telemedicine journal and e-health : the official journal of the American Telemedicine Association         | Wrong comparator                          |
| 39 | Markun et al, 2017                | Medicine (United States)                                                                                  | Wrong comparator                          |
| 40 | Feigenbaum et al, 2017            | Pediatric Dermatology                                                                                     | Wrong comparator                          |
| 41 | Massone et al, 2014               | Journal of the European Academy of Dermatology and Venereology                                            | Wrong comparator                          |
| 42 | MacLellan et al, 2021             | Journal of the American Academy of Dermatology                                                            | Wrong comparator                          |
| 43 | Koysombat et al, 2021             | Journal of plastic, reconstructive & aesthetic surgery : JPRAS                                            | Correspondence                            |
| 44 | Jakhar et al, 2020                | Clinical and experimental dermatology                                                                     | Correspondence                            |
| 45 | Alkmim et al, 2013                | Journal of Telemedicine and Telecare                                                                      | Correspondence                            |
| 46 | NCT02836665, 2016                 | <a href="http://ClinicalTrials.gov">ClinicalTrials.gov</a>                                                | Clinical trial - no associated manuscript |
| 47 | JPRN-UMIN000020873 et al, 2016    |                                                                                                           | Clinical trial - no associated manuscript |
| 48 | Fogel et al, 2016                 | Journal of the American Academy of Dermatology                                                            | Commentary                                |
| 49 | Hoyer et al, 2020                 | Cutis                                                                                                     | Commentary                                |
| 50 | Pasady et al, 2020                | Journal of the American Academy of Dermatology                                                            | Duplicate                                 |
| 51 |                                   |                                                                                                           |                                           |
| 52 |                                   |                                                                                                           |                                           |
| 53 |                                   |                                                                                                           |                                           |
| 54 |                                   |                                                                                                           |                                           |
| 55 |                                   |                                                                                                           |                                           |
| 56 |                                   |                                                                                                           |                                           |
| 57 |                                   |                                                                                                           |                                           |
| 58 |                                   |                                                                                                           |                                           |
| 59 |                                   |                                                                                                           |                                           |
| 60 |                                   |                                                                                                           |                                           |

|   |                       |                                                                                                      |                          |
|---|-----------------------|------------------------------------------------------------------------------------------------------|--------------------------|
| 1 |                       |                                                                                                      |                          |
| 2 |                       |                                                                                                      |                          |
| 3 | Moreno-Ramirez et al, | American Journal of Clinical Dermatology                                                             | Erratum                  |
| 4 | 2017                  |                                                                                                      |                          |
| 5 | Trovato et al, 2011   | Eplasty                                                                                              | Wrong patient population |
| 6 | Bowns et al, 2016     | Health Technology Assessment Database                                                                | Wrong publication date   |
| 7 | Gemelas et al, 2019   | Telemedicine journal and e-health : the official journal of the<br>American Telemedicine Association | Wrong setting            |

**eTable 5. List of studies excluded at the full-text screening stage.**

For peer review only

A

| Domain 1: SAMPLE SELECTION                                   |                                                                                                                                                                                                                                                                                                                                                                                                                                                                                                                                                                                                                                                                                                                                                                                                                                                |                        |
|--------------------------------------------------------------|------------------------------------------------------------------------------------------------------------------------------------------------------------------------------------------------------------------------------------------------------------------------------------------------------------------------------------------------------------------------------------------------------------------------------------------------------------------------------------------------------------------------------------------------------------------------------------------------------------------------------------------------------------------------------------------------------------------------------------------------------------------------------------------------------------------------------------------------|------------------------|
| Signalling Q1                                                | <p>Was a consecutive or random sample of patients enrolled?</p> <ul style="list-style-type: none"> <li>- In the study by Giavina-Bianchi et al., a consecutive sample of patients was enrolled, introducing less bias.</li> </ul> <p>Skewed patient demographics: e.g., over 70% female, select age groups, studies.</p> <p>that do not disclose age range and or sex/gender of the patients.</p> <ul style="list-style-type: none"> <li>- In the study by Carter et al., over 70% of the patients were female, which may introduce bias and reduce applicability.</li> </ul>                                                                                                                                                                                                                                                                  | Yes/No/Unclear         |
| Signalling Q2                                                | <p>Was a case-control design avoided?</p> <ul style="list-style-type: none"> <li>- Gabel et al. avoided a case-control design, which reduces the risk of bias.</li> </ul>                                                                                                                                                                                                                                                                                                                                                                                                                                                                                                                                                                                                                                                                      | Yes/No/Unclear         |
| Signalling Q3                                                | <p>Did the study avoid inappropriate exclusions?</p> <ul style="list-style-type: none"> <li>- In the study by Giavina-Bianchi et al., complex, and severe cases were excluded, which may introduce bias and affect applicability.</li> </ul>                                                                                                                                                                                                                                                                                                                                                                                                                                                                                                                                                                                                   | Yes/No/Unclear         |
| Risk of bias                                                 | <p><b>Could the selection of patients have introduced bias?</b></p> <ul style="list-style-type: none"> <li>- For example, Giavina-Bianchi removed the most complex/severe cases and then excluded any non-skin neoplasms, and then they further filtered to only include the 10 most common skin neoplasms.</li> </ul>                                                                                                                                                                                                                                                                                                                                                                                                                                                                                                                         | RISK: LOW/HIGH/UNCLEAR |
| Concerns regarding applicability                             | <p><b>Is there concern that the included patients do not match the review question?</b></p> <ul style="list-style-type: none"> <li>- 'High' if the study only looked at a specific lesion category such as skin cancers only, or pigmented lesions only, or if they had a skewed patient demographics (e.g., 70% female, or geriatric population only). Our study is focuses on generalizability of teledermatology in all skin conditions.</li> </ul>                                                                                                                                                                                                                                                                                                                                                                                         | RISK: LOW/HIGH/UNCLEAR |
| Domain 2: INDEX TEST (Teledermatology consult)               |                                                                                                                                                                                                                                                                                                                                                                                                                                                                                                                                                                                                                                                                                                                                                                                                                                                |                        |
| Signalling Q1                                                | <p>Were the derms/physicians making the index diagnoses unaware of the reference diagnosis?</p> <ul style="list-style-type: none"> <li>- Same dermatologist doing F2F and teledermatology consults? Is there blinding of dermatologists to each other's diagnoses? In the study by Tan et al., the same dermatologist performed both the F2F and teledermatology consultations, which may introduce bias if they were not blinded to each other's diagnoses.</li> </ul>                                                                                                                                                                                                                                                                                                                                                                        | Yes/No/Unclear         |
| Signalling Q2                                                | <p>Did the study require physicians to provide a specific primary diagnosis, or were they only required to provide a general grouping, e.g., inflammatory vs. skin neoplasm. Was analysis only performed for categories instead of complete primary diagnoses (such as skin neoplasm vs basal cell carcinoma)? Did physicians use standardized referral/consult sheet with set diagnoses? Did they group similar / synonymous diagnoses (e.g dermatitis / eczema together)? Was a non-specialist in charge of comparing diagnoses and deciding if there was agreement?</p> <ul style="list-style-type: none"> <li>- In the study by Warshaw et al., physicians were required to provide a categorical or pooled diagnosis (e.g., skin neoplasm instead of basal cell carcinoma), which may introduce bias and reduce applicability.</li> </ul> | Yes/No/Unclear         |
| Risk of bias                                                 | <p><b>Could the conduct (technology used for taking images/viewing images) or interpretation (what constituted primary diagnosis/ complete agreement) of the index test have introduced bias?</b></p>                                                                                                                                                                                                                                                                                                                                                                                                                                                                                                                                                                                                                                          | RISK: LOW/HIGH/UNCLEAR |
| Concerns regarding applicability                             | <p>Is there concern that the index test, its conduct, or interpretation differ from the review question?</p>                                                                                                                                                                                                                                                                                                                                                                                                                                                                                                                                                                                                                                                                                                                                   | RISK: LOW/HIGH/UNCLEAR |
| Domain 3: REFERENCE TEST (F2F, in some cases histopathology) |                                                                                                                                                                                                                                                                                                                                                                                                                                                                                                                                                                                                                                                                                                                                                                                                                                                |                        |
| Signalling Q1                                                | <p>Describe the reference standard and how it was conducted and interpreted:</p>                                                                                                                                                                                                                                                                                                                                                                                                                                                                                                                                                                                                                                                                                                                                                               | Yes/No/Unclear         |



|                                         |                                                                                                                                                                                                                                                                                                                                                                                                                                                                              |                        |
|-----------------------------------------|------------------------------------------------------------------------------------------------------------------------------------------------------------------------------------------------------------------------------------------------------------------------------------------------------------------------------------------------------------------------------------------------------------------------------------------------------------------------------|------------------------|
|                                         | <p>What was the order of visits?</p> <p>What was the experience level and specialization of the F2F physician?</p> <p>Did the same dermatologist do both teledermatology and F2F consult?</p>                                                                                                                                                                                                                                                                                |                        |
| Signalling Q2                           | Is the reference standard likely to correctly classify the target condition?                                                                                                                                                                                                                                                                                                                                                                                                 | Yes/No/Unclear         |
| <b>Risk of bias</b>                     | <p><b>Could the reference standard, its conduct, or its interpretation have introduced bias?</b></p> <ul style="list-style-type: none"> <li>- In studies where the reference standard was a consultation with a non-specialist, such as Costello et al., there is a risk of introducing bias.</li> </ul>                                                                                                                                                                     | RISK: LOW/HIGH/UNCLEAR |
| <b>Concerns regarding applicability</b> | <p><b>Could the reference standard, its conduct, or its interpretation have introduced bias?</b></p> <ul style="list-style-type: none"> <li>- Applicability was impacted by physician specialization.</li> </ul>                                                                                                                                                                                                                                                             | RISK: LOW/HIGH/UNCLEAR |
| <b>Domain 4: FLOW AND TIMING</b>        |                                                                                                                                                                                                                                                                                                                                                                                                                                                                              |                        |
| Signalling Q1                           | <p>Was there an appropriate interval between index test(s) and reference standard?</p> <ul style="list-style-type: none"> <li>- Was the time interval greater than 2 weeks? In studies where the same dermatologist did F2F and teledermatology -&gt; Say 'No' regardless of the time between teledermatology and F2F consult.</li> <li>- In the study by Gerhardt et al., there was a 30-day interval between teledermatology and F2F, which may introduce bias.</li> </ul> | Yes/No/Unclear         |
| Signalling Q2                           | Did all patients receive a reference standard?                                                                                                                                                                                                                                                                                                                                                                                                                               |                        |
| Signalling Q3                           | <p>Did all patients receive the same reference standard?</p> <ul style="list-style-type: none"> <li>- In studies like Sola-Ortigosa et al., all patients received a reference standard, either histopathology or F2F consultation.</li> </ul> <p>Did a paper use histopathology as the reference standard for cancer lesions but F2F for non-cancer lesions? Were all patients evaluated by physicians with similar level of experience?</p>                                 | Yes/No/Unclear         |
| Signalling Q4                           | <p>Were all patients included in the analysis?</p> <ul style="list-style-type: none"> <li>- In studies like Gabel et al., all patients were included in the analysis, reducing the risk of bias.</li> </ul>                                                                                                                                                                                                                                                                  | Yes/No/Unclear         |
| <b>Risk of bias</b>                     | Could the patient flow have introduced bias?                                                                                                                                                                                                                                                                                                                                                                                                                                 | RISK: LOW/HIGH/UNCLEAR |



B

| Study                            | Risk of bias domains |    |    |    |         |
|----------------------------------|----------------------|----|----|----|---------|
|                                  | D1                   | D2 | D3 | D4 | Overall |
| Altieri, et al, 2017             | +                    | +  | +  | +  | +       |
| Azfar, et al, 2014               | +                    | +  | +  | +  | X       |
| Barbieri, et al, 2014            | +                    | +  | -  | +  | -       |
| Barcaui, et al, 2018             | +                    | +  | X  | X  | X       |
| Batalla, et al, 2015             | -                    | +  | +  | +  | -       |
| Borve, et al, 2012               | +                    | +  | X  | X  | X       |
| Borve, et al, 2013               | X                    | -  | +  | +  | X       |
| Carter, et al, 2017              | X                    | -  | +  | X  | X       |
| Chen, et al, 2010                | +                    | X  | X  | -  | X       |
| Clarke, et al, 2021              | X                    | X  | +  | +  | X       |
| Costello, et al, 2019            | X                    | +  | X  | X  | X       |
| Duong, et al, 2014               | +                    | -  | X  | X  | X       |
| Gabel, et al, 2021               | X                    | +  | +  | X  | X       |
| Gatica, 2015                     | +                    | +  | -  | +  | -       |
| Gerhardt, et al, 2021            | X                    | -  | X  | X  | X       |
| Giavina-Bianchi, et al, Oct 2020 | X                    | +  | -  | X  | X       |
| Giavina-Bianchi, et al, Nov 2020 | X                    | +  | -  | X  | X       |
| Gonzalez-Coloma, et al, 2019     | +                    | X  | X  | +  | X       |
| Goulart-Silveira, et al, 2019    | X                    | +  | +  | X  | X       |
| Jones, et al, 2021               | +                    | -  | +  | +  | -       |
| Keller, et al, 2020              | +                    | +  | +  | +  | +       |
| Lamel, et al, 2012               | -                    | -  | +  | +  | -       |
| Marchell, et al, 2017            | +                    | +  | +  | +  | +       |
| Muir, et al, 2011                | X                    | +  | +  | X  | X       |
| Nami, et al, 2015                | X                    | +  | +  | +  | X       |
| Okita, et al, 2016               | +                    | +  | +  | +  | X       |
| Patro, et al, 2015               | +                    | +  | X  | +  | X       |
| Piccoli, et al, 2015             | X                    | +  | X  | X  | X       |
| Ribas, et al, 2010               | X                    | +  | X  | X  | X       |
| Rubegni, et al, 2011             | +                    | +  | +  | +  | +       |
| Saleh, et al, 2017               | +                    | +  | +  | +  | +       |
| Senel, et al, 2013               | X                    | +  | +  | X  | X       |
| Sola-Ortigosa, et al, 2020       | +                    | +  | X  | X  | X       |
| Tan, et al, 2010                 | X                    | X  | +  | X  | X       |
| Tran, et al, 2011                | +                    | +  | X  | +  | X       |
| Vano-Galvan, et al, 2010         | +                    | +  | +  | +  | X       |
| Vestergaard, et al, 2020         | +                    | +  | +  | X  | X       |
| Warshaw, et al, 2015             | +                    | -  | +  | +  | -       |
| Zanini, 2013                     | -                    | +  | +  | -  | -       |
| Zink, et al, 2017, July          | +                    | -  | X  | X  | X       |
| Zink, et al, 2017, Sept          | +                    | +  | +  | +  | +       |

Domains:  
 D1: Patient selection.  
 D2: Index test.  
 D3: Reference standard.  
 D4: Flow & timing.

Judgement  
 X High  
 - Some concerns  
 + Low

1  
2  
3  
4  
5  
6  
7  
8  
9  
10  
11  
12  
13  
14  
15  
16  
17  
18  
19  
20  
21  
22  
23  
24  
25  
26  
27  
28  
29  
30  
31  
32  
33  
34  
35  
36  
37  
38  
39  
40  
41  
42  
43  
44  
45  
46  
47  
48  
49  
50  
51  
52  
53  
54  
55  
56  
57  
58  
59  
60

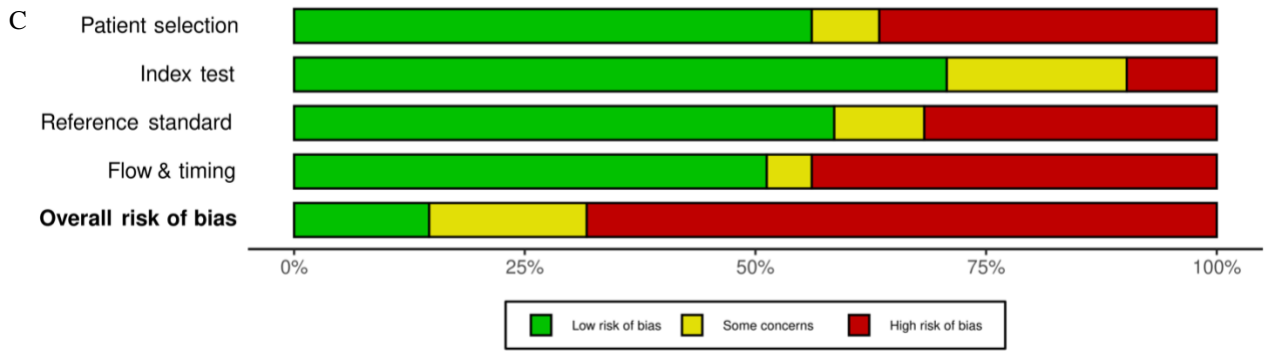

**D**

Risk of bias domains

| Study                        | D1       | D2      | D3      | D4       | D5      | Overall           |
|------------------------------|----------|---------|---------|----------|---------|-------------------|
| Rios-Yuil, 2011              | High (X) | Low (+) | Low (+) | High (X) | Low (+) | High (X)          |
| Romero, et al, 2010          | Low (+)  | Low (+) | Low (+) | High (X) | Low (+) | Some concerns (-) |
| Romero Aguilera, et al, 2014 | Low (+)  | Low (+) | Low (+) | High (X) | Low (+) | Some concerns (-) |

Domains:  
 D1: Bias arising from the randomization process.  
 D2: Bias due to deviations from intended intervention.  
 D3: Bias due to missing outcome data.  
 D4: Bias in measurement of the outcome.  
 D5: Bias in selection of the reported result.

Judgement  
 High (X)  
 Some concerns (-)  
 Low (+)

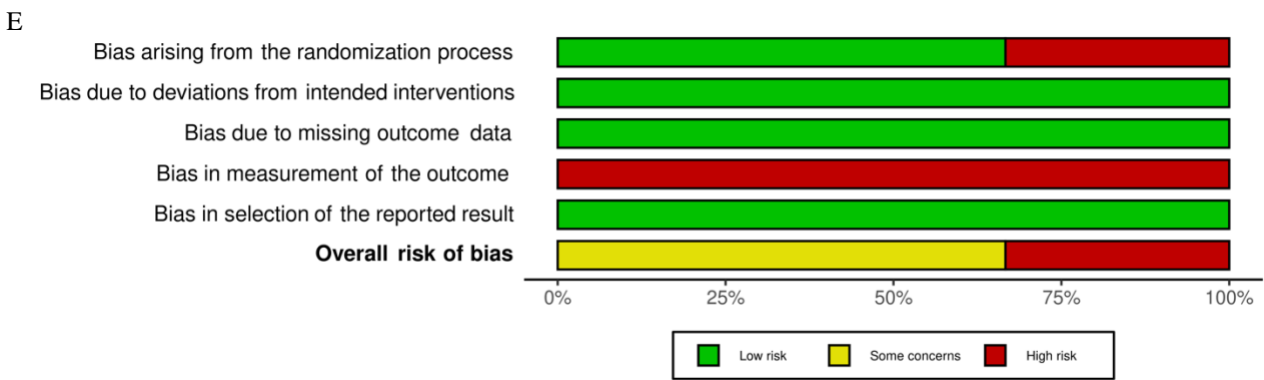

**eTable 6. Risk of Bias (ROB) results.**

(A) QUADAS-2 summary sheet. (B,C) QUADAS-2 RoB analysis of 41 observational studies. (D,E) ROB-2 analysis of three randomized controlled trials.

## eReferences.

1. Hoyer P, Ahatov R, Ross L. Utilization of telehealth services during the COVID-19 pandemic. *Cutis*. 2020;106(2):70-1.
2. Gomez Arias PJ, Arias Blanco MC, Redondo Sanchez J, et al. [Usefulness and efficiency of teledermoscopy in skin cancer management in primary care]. *Semergen*. 2020;46(8):553-9.
3. Jacoby T, Woolard A, Chamoun S, et al. Asynchronous Teledermatology Assessment of Young Adult Acne Likely Concordant With In-Person Evaluation. *Journal of drugs in dermatology : JDD*. 2021;20(4):432-5.
4. McHugh ML. Interrater reliability: the kappa statistic. *Biochem Med (Zagreb)*. 2012;22(3):276-82.
5. Altieri L, Hu J, Nguyen A, et al. Interobserver reliability of teledermatology across all Fitzpatrick skin types. *Journal of telemedicine and telecare*. 2017;23(1):68-73.
6. Castelo-Soccio L, Kovarik CL, Azfar RS, et al. Reliability and validity of mobile teledermatology in human immunodeficiency virus-positive patients in botswana a pilot study. *JAMA Dermatology*. 2014;150(6):601-7.
7. Barbieri JS, Nelson CA, James WD, et al. The reliability of teledermatology to triage inpatient dermatology consultations. *JAMA Dermatology*. 2014;150(4):419-24.
8. Barcaui CB, Lima PMO. Application of teledermoscopy in the diagnosis of pigmented lesions. *International Journal of Telemedicine and Applications*. 2018;2018((Barcaui) Adjunct Professor of Dermatology, Faculty of Medical Sciences, State University of Rio de Janeiro, PhD in Medicine (Dermatology), University of Sao Paulo, Dermatology Department, Pedro Ernesto University Hospital, Rio de Janeiro State University):1624073.
9. Batalla A, Suh-Oh HJ, Abalde T, et al. Teledermatology in Paediatrics. Observations in daily clinical practice. *Anales de pediatria (Barcelona, Spain : 2003)*. 2016;84(6):324-30.
10. Borve A, Holst A, Gente-Lidholm A, et al. Use of the mobile phone multimedia messaging service for teledermatology. *Journal of Telemedicine and Telecare*. 2012;18(5):292-6.
11. Borve A, Terstappen K, Sandberg C, et al. Mobile teledermoscopy-there's an app for that! *Dermatology practical & conceptual*. 2013;3(2):41-8.
12. Carter ZA, Li X, Goldman S, et al. Creation of an internal teledermatology store-and-forward system in an existing electronic health record: A pilot study in a safety-net public health and hospital system. *JAMA Dermatology*. 2017;153(7):644-50.
13. Chen TS, Goldyne ME, Mathes EFD, et al. Pediatric teledermatology: Observations based on 429 consults. *Journal of the American Academy of Dermatology*. 2010;62(1):61-6.
14. Clarke EL, Reichenberg JS, Ahmed AM, et al. The utility of teledermatology in the evaluation of skin lesions. *Journal of telemedicine and telecare*. 2021(9506702, cpj):1357633X20987423.
15. Costello CM, Cumsy HJL, Maly CJ, et al. Improving Access to Care Through the Establishment of a Local, Teledermatology Network. *Telemedicine journal and e-health : the official journal of the American Telemedicine Association*. 2020;26(7):935-40.
16. Duong TA, Cordoliani F, Julliard C, et al. Emergency department diagnosis and management of skin diseases with real-time teledermatologic expertise. *JAMA Dermatology*. 2014;150(7):743-7.
17. Gabel CK, Nguyen E, Karmouta R, et al. Use of teledermatology by dermatology hospitalists is effective in the diagnosis and management of inpatient disease. *Journal of the American Academy of Dermatology*. 2021;84(6):1547-53.
18. Gatica JL, Bertolo S, Morales E, et al. Store-and-forward teledermatology in Chile: A contribution to primary health care. *Piel*. 2015;30(3):148-54.
19. Gerhardt CA, Foels R, Grewe S, et al. Assessing the Diagnostic Accuracy of Teledermatology Consultations at a Local Veterans Affairs Dermatology Clinic. *Cureus*. 2021;13(6):e15406.
20. Giavina-Bianchi M, Azevedo MFD, Sousa RM, et al. Part II: Accuracy of Teledermatology in Skin Neoplasms. *Frontiers in medicine*. 2020;7(101648047):598903.
21. Giavina-Bianchi M, Sousa R, Cordioli E. Part I: Accuracy of Teledermatology in Inflammatory Dermatoses. *Frontiers in medicine*. 2020;7(101648047):585792.
22. Keller JJ, Johnson JP, Latour E. Inpatient teledermatology: Diagnostic and therapeutic concordance among a hospitalist, dermatologist, and teledermatologist using store-and-forward teledermatology. *Journal of the American Academy of Dermatology*. 2020;82(5):1262-7.
23. Lamel SA, Haldeman KM, Ely H, et al. Application of mobile teledermatology for skin cancer screening. *Journal of the American Academy of Dermatology*. 2012;67(4):576-81.
24. Muir J, Xu C, Singh P, et al. Incorporating teledermatology into emergency medicine. *EMA - Emergency Medicine Australasia*. 2011;23(5):562-8.

25. Nami N, Rubegni P, Fimiani M, et al. Concordance and Time Estimation of Store-and-Forward Mobile Teledermatology Compared to Classical Face-to-Face Consultation. *Acta Dermato-Venereologica*. 2015;95(1):35-9.
26. Okita AL, Molina Tinoco LJ, Criado PR, et al. Use of Smartphones in Telemedicine: Comparative Study Between Standard and Teledermatological Evaluation of High-Complex Care Hospital Inpatients. *Telemedicine journal and e-health : the official journal of the American Telemedicine Association*. 2016;22(9):755-60.
27. Patro BK, Tripathy JP, De D, et al. Diagnostic agreement between a primary care physician and a teledermatologist for common dermatological conditions in North India. *Indian dermatology online journal*. 2015;6(1):21-6.
28. Ribas J, Schettini APM, Ribas CBDR, et al. Agreement between dermatological diagnoses made by live examination compared to analysis of digital images. *Anais Brasileiros de Dermatologia*. 2010;85(4):441-7.
29. Rios-Yuil JM. [Correlation between face-to-face assessment and telemedicine for the diagnosis of skin disease in case conferences]. *Actas dermo-sifiliograficas*. 2012;103(2):138-43.
30. Romero Aguilera G, Cortina De La Calle P, Vera Iglesias E, et al. Interobserver reliability of store-and-forward teledermatology in a clinical practice setting. *Actas Dermo-Sifiliograficas*. 2014;105(6):605-13.
31. Romero G, Sanchez P, Garcia M, et al. Randomized controlled trial comparing store-and-forward teledermatology alone and in combination with web-camera videoconferencing. *Clinical and Experimental Dermatology*. 2010;35(3):311-7.
32. Rubegni P, Nami N, Poggiali S, et al. Geriatric teledermatology: Store-and-forward vs. face-to-face examination. *Journal of the European Academy of Dermatology and Venereology*. 2011;25(11):1334-9.
33. Saleh N, Abdel Hay R, Hegazy R, et al. Can teledermatology be a useful diagnostic tool in dermatology practice in remote areas? An Egyptian experience with 600 patients. *Journal of telemedicine and telecare*. 2017;23(2):233-8.
34. Sola-Ortigosa J, Munoz-Santos C, Masat-Tico T, et al. The Role of Teledermatology and Teledermoscopy in the Diagnosis of Actinic Keratosis and Field Cancerization. *The Journal of investigative dermatology*. 2020;140(10):1976-84.e4.
35. Tan E, Yung A, Oakley A, et al. Successful triage of patients referred to a skin lesion clinic using teledermoscopy (IMAGE IT trial). *British Journal of Dermatology*. 2010;162(4):803-11.
36. Tran K, Ayad M, Monir S, et al. Mobile teledermatology in the developing world: Implications of a feasibility study on 30 Egyptian patients with common skin diseases. *Journal of the American Academy of Dermatology*. 2011;64(2):302-9.
37. Vano-Galvan S, Aguayo-Leiva I, Rios-Buceta L, et al. Store-and-forward teledermatology: Assessment of validity in a series of 2000 observations. *Actas Dermo-Sifiliograficas*. 2011;102(4):277-83.
38. Vestergaard T, Prasad SC, Schuster A, et al. Diagnostic accuracy and interobserver concordance: teledermoscopy of 600 suspicious skin lesions in Southern Denmark. *Journal of the European Academy of Dermatology and Venereology : JEADV*. 2020;34(7):1601-8.
39. Gravely AA, Warshaw EM, Nelson DB. Reliability of store and forward teledermatology for skin neoplasms. *Journal of the American Academy of Dermatology*. 2015;72(3):426-35.
40. Zanini M. Analyze of diagnostic concordance between face-to-face and teledermatology diagnosis. *Medicina Cutanea Ibero-Latino-Americana*. 2013;41(2):60-2.
41. Zink A, Kolbinger A, Leibl M, et al. The value of teledermatology using a mobile app compared to conventional dermatology. *European Journal of Dermatology*. 2017;27(4):429-31.
42. Zink A, Kolbinger A, Leibl M, et al. Teledermoscopy by mobile phones: Reliable help in the diagnosis of skin lesions? *Hautarzt*. 2017;68(11):890-5.
43. Marchell R, Locatis C, Liu W-L, et al. Comparing High Definition Live Interactive and Store-and-Forward Consultations to In-Person Examinations. *Telemedicine journal and e-health : the official journal of the American Telemedicine Association*. 2017;23(3):213-8.
44. Jones L, Jameson M, Oakley A. Remote Skin Cancer Diagnosis: Adding Images to Electronic Referrals Is More Efficient Than Wait-Listing for a Nurse-Led Imaging Clinic. *Cancers (Basel)*. 2021;13(22).
45. Gonzalez Coloma F, Sandoval Garces M, Gedda Quiroga V, et al. Teledermatology in Remote Parts of Chile: Experience in 4 Isolated Rural Areas. *Actas dermo-sifiliograficas*. 2019;110(8):653-8.
46. Goulart Silveira CE, Carcano C, Mauad EC, et al. Call phone usefulness to improve the skin cancer screening: preliminary results and critical analysis of mobile app development. *Rural & Remote Health*. 2019;19(1):1-7.
47. Piccoli MF, Amorim BDB, Wagner HM, et al. Teledermatology protocol for screening of Skin cancer. *Anais Brasileiros de Dermatologia*. 2015;90(2):202-10.

- 1  
2  
3 48. Senel E, Baba M, Durdu M. The contribution of teledermatology to the diagnosis and management of non-  
4 melanocytic skin tumours. *Journal of Telemedicine and Telecare*. 2013;19(1):60-3.  
5 49. Gravely AA, Nelson DB, Warshaw EM. Accuracy of teledermatology/teledermoscopy and clinic-based  
6 dermatology for specific categories of skin neoplasms. *Journal of the American Academy of Dermatology*.  
7 2010;63(2):348-52.  
8  
9  
10  
11  
12  
13  
14  
15  
16  
17  
18  
19  
20  
21  
22  
23  
24  
25  
26  
27  
28  
29  
30  
31  
32  
33  
34  
35  
36  
37  
38  
39  
40  
41  
42  
43  
44  
45  
46  
47  
48  
49  
50  
51  
52  
53  
54  
55  
56  
57  
58  
59  
60

For peer review only

## MOOSE Checklist for Meta-analyses of Observational Studies

| Item No                                     | Recommendation                                                                                                                                                                                                                                                               | Reported on Page No        |
|---------------------------------------------|------------------------------------------------------------------------------------------------------------------------------------------------------------------------------------------------------------------------------------------------------------------------------|----------------------------|
| Reporting of background should include      |                                                                                                                                                                                                                                                                              |                            |
| 1                                           | Problem definition                                                                                                                                                                                                                                                           | 4                          |
| 2                                           | Hypothesis statement                                                                                                                                                                                                                                                         | 4                          |
| 3                                           | Description of study outcome(s)                                                                                                                                                                                                                                              | 4-5                        |
| 4                                           | Type of exposure or intervention used                                                                                                                                                                                                                                        | 6-8                        |
| 5                                           | Type of study designs used                                                                                                                                                                                                                                                   | 6-8                        |
| 6                                           | Study population                                                                                                                                                                                                                                                             | 6-8                        |
| Reporting of search strategy should include |                                                                                                                                                                                                                                                                              |                            |
| 7                                           | Qualifications of searchers (eg, librarians and investigators)                                                                                                                                                                                                               | 6                          |
| 8                                           | Search strategy, including time period included in the synthesis and key words                                                                                                                                                                                               | 6-8                        |
| 9                                           | Effort to include all available studies, including contact with authors                                                                                                                                                                                                      | 6-8                        |
| 10                                          | Databases and registries searched                                                                                                                                                                                                                                            | 6-8                        |
| 11                                          | Search software used, name and version, including special features used (eg, explosion)                                                                                                                                                                                      | 6-8                        |
| 12                                          | Use of hand searching (eg, reference lists of obtained articles)                                                                                                                                                                                                             | 6-8                        |
| 13                                          | List of citations located and those excluded, including justification                                                                                                                                                                                                        | Supplement                 |
| 14                                          | Method of addressing articles published in languages other than English                                                                                                                                                                                                      | 6-8                        |
| 15                                          | Method of handling abstracts and unpublished studies                                                                                                                                                                                                                         | 6-8,<br>Supplement         |
| 16                                          | Description of any contact with authors                                                                                                                                                                                                                                      | 6-8,<br>Supplement         |
| Reporting of methods should include         |                                                                                                                                                                                                                                                                              |                            |
| 17                                          | Description of relevance or appropriateness of studies assembled for assessing the hypothesis to be tested                                                                                                                                                                   | 9-12                       |
| 18                                          | Rationale for the selection and coding of data (eg, sound clinical principles or convenience)                                                                                                                                                                                | 9-12                       |
| 19                                          | Documentation of how data were classified and coded (eg, multiple raters, blinding and interrater reliability)                                                                                                                                                               | 9-12                       |
| 20                                          | Assessment of confounding (eg, comparability of cases and controls in studies where appropriate)                                                                                                                                                                             | 9-12                       |
| 21                                          | Assessment of study quality, including blinding of quality assessors, stratification or regression on possible predictors of study results                                                                                                                                   | 9-12                       |
| 22                                          | Assessment of heterogeneity                                                                                                                                                                                                                                                  | 9-12                       |
| 23                                          | Description of statistical methods (eg, complete description of fixed or random effects models, justification of whether the chosen models account for predictors of study results, dose-response models, or cumulative meta-analysis) in sufficient detail to be replicated | 9-12                       |
| 24                                          | Provision of appropriate tables and graphics                                                                                                                                                                                                                                 | 9-12,<br>Supplement        |
| Reporting of results should include         |                                                                                                                                                                                                                                                                              |                            |
| 25                                          | Graphic summarizing individual study estimates and overall estimate                                                                                                                                                                                                          | Fig 1-3,<br>Supplement     |
| 26                                          | Table giving descriptive information for each study included                                                                                                                                                                                                                 | Tables 1, 2,<br>Supplement |
| 27                                          | Results of sensitivity testing (eg, subgroup analysis)                                                                                                                                                                                                                       | 9-12                       |
| 28                                          | Indication of statistical uncertainty of findings                                                                                                                                                                                                                            | 9-12                       |

| Item No                                 | Recommendation                                                                                                            | Reported on Page No |
|-----------------------------------------|---------------------------------------------------------------------------------------------------------------------------|---------------------|
| Reporting of discussion should include  |                                                                                                                           |                     |
| 29                                      | Quantitative assessment of bias (eg, publication bias)                                                                    | 9-12                |
| 30                                      | Justification for exclusion (eg, exclusion of non-English language citations)                                             | 9-12                |
| 31                                      | Assessment of quality of included studies                                                                                 | 9-12                |
| Reporting of conclusions should include |                                                                                                                           |                     |
| 32                                      | Consideration of alternative explanations for observed results                                                            | 13-17               |
| 33                                      | Generalization of the conclusions (ie, appropriate for the data presented and within the domain of the literature review) | 13-17               |
| 34                                      | Guidelines for future research                                                                                            | 13-17               |
| 35                                      | Disclosure of funding source                                                                                              | 18                  |

From: Stroup DF, Berlin JA, Morton SC, et al, for the Meta-analysis Of Observational Studies in Epidemiology (MOOSE) Group. Meta-analysis of Observational Studies in Epidemiology. A Proposal for Reporting. *JAMA*. 2000;283(15):2008-2012. doi: 10.1001/jama.283.15.2008.



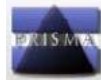

## PRISMA 2020 Checklist

| Section and Topic             | Item # | Checklist item                                                                                                                                                                                                                                                                                       | Location where item is reported |
|-------------------------------|--------|------------------------------------------------------------------------------------------------------------------------------------------------------------------------------------------------------------------------------------------------------------------------------------------------------|---------------------------------|
| <b>TITLE</b>                  |        |                                                                                                                                                                                                                                                                                                      |                                 |
| Title                         | 1      | Identify the report as a systematic review.                                                                                                                                                                                                                                                          | p1                              |
| <b>ABSTRACT</b>               |        |                                                                                                                                                                                                                                                                                                      |                                 |
| Abstract                      | 2      | See the PRISMA 2020 for Abstracts checklist.                                                                                                                                                                                                                                                         | p3-4                            |
| <b>INTRODUCTION</b>           |        |                                                                                                                                                                                                                                                                                                      |                                 |
| Rationale                     | 3      | Describe the rationale for the review in the context of existing knowledge.                                                                                                                                                                                                                          | p5-6                            |
| Objectives                    | 4      | Provide an explicit statement of the objective(s) or question(s) the review addresses.                                                                                                                                                                                                               | p5-6                            |
| <b>METHODS</b>                |        |                                                                                                                                                                                                                                                                                                      |                                 |
| Eligibility criteria          | 5      | Specify the inclusion and exclusion criteria for the review and how studies were grouped for the syntheses.                                                                                                                                                                                          | p8, Supplementary p15           |
| Information sources           | 6      | Specify all databases, registers, websites, organisations, reference lists and other sources searched or consulted to identify studies. Specify the date when each source was last searched or consulted.                                                                                            | p7                              |
| Search strategy               | 7      | Present the full search strategies for all databases, registers and websites, including any filters and limits used.                                                                                                                                                                                 | Supplementary p2                |
| Selection process             | 8      | Specify the methods used to decide whether a study met the inclusion criteria of the review, including how many reviewers screened each record and each report retrieved, whether they worked independently, and if applicable, details of automation tools used in the process.                     | p8                              |
| Data collection process       | 9      | Specify the methods used to collect data from reports, including how many reviewers collected data from each report, whether they worked independently, any processes for obtaining or confirming data from study investigators, and if applicable, details of automation tools used in the process. | p8                              |
| Data items                    | 10a    | List and define all outcomes for which data were sought. Specify whether all results that were compatible with each outcome domain in each study were sought (e.g. for all measures, time points, analyses), and if not, the methods used to decide which results to collect.                        | Supplementary p15               |
|                               | 10b    | List and define all other variables for which data were sought (e.g. participant and intervention characteristics, funding sources). Describe any assumptions made about any missing or unclear information.                                                                                         | p8 and Supplementary p15        |
| Study risk of bias assessment | 11     | Specify the methods used to assess risk of bias in the included studies, including details of the tool(s) used, how many reviewers assessed each study and whether they worked independently, and if applicable, details of automation tools used in the process.                                    | p9                              |
| Effect measures               | 12     | Specify for each outcome the effect measure(s) (e.g. risk ratio, mean difference) used in the synthesis or presentation of results.                                                                                                                                                                  | p8-9                            |
| Synthesis methods             | 13a    | Describe the processes used to decide which studies were eligible for each synthesis (e.g. tabulating the study intervention characteristics and comparing against the planned groups for each synthesis (item #5)).                                                                                 | p8-9                            |
|                               | 13b    | Describe any methods required to prepare the data for presentation or synthesis, such as handling of missing summary statistics, or data conversions.                                                                                                                                                | p 8-9<br>Supplementary p2       |
|                               | 13c    | Describe any methods used to tabulate or visually display results of individual studies and syntheses.                                                                                                                                                                                               | p 8-9<br>Supplementary p2       |
|                               | 13d    | Describe any methods used to synthesize results and provide a rationale for the choice(s). If meta-analysis was performed, describe the model(s), method(s) to identify the presence and extent of statistical heterogeneity, and software package(s) used.                                          | p 8-9<br>Supplementary p2       |
|                               | 13e    | Describe any methods used to explore possible causes of heterogeneity among study results (e.g. subgroup analysis, meta-regression).                                                                                                                                                                 | p 8-9<br>Supplementary p2       |
|                               | 13f    | Describe any sensitivity analyses conducted to assess robustness of the synthesized results.                                                                                                                                                                                                         | NA                              |
| Reporting bias assessment     | 14     | Describe any methods used to assess risk of bias due to missing results in a synthesis (arising from reporting biases).                                                                                                                                                                              | p9                              |
| Certainty assessment          | 15     | Describe any methods used to assess certainty (or confidence) in the body of evidence for an outcome.                                                                                                                                                                                                | NA                              |



## PRISMA 2020 Checklist

1  
2  
3  
4  
5  
6  
7  
8  
9  
10  
11  
12  
13  
14  
15  
16  
17  
18  
19  
20  
21  
22  
23  
24  
25  
26  
27  
28  
29  
30  
31  
32  
33  
34  
35  
36  
37  
38  
39  
40  
41  
42  
43  
44  
45  
46  
47

| Section and Topic                              | Item # | Checklist item                                                                                                                                                                                                                                                                       | Location where item is reported        |
|------------------------------------------------|--------|--------------------------------------------------------------------------------------------------------------------------------------------------------------------------------------------------------------------------------------------------------------------------------------|----------------------------------------|
| <b>RESULTS</b>                                 |        |                                                                                                                                                                                                                                                                                      |                                        |
| Study selection                                | 16a    | Describe the results of the search and selection process, from the number of records identified in the search to the number of studies included in the review, ideally using a flow diagram.                                                                                         | Figure 1, p10                          |
|                                                | 16b    | Cite studies that might appear to meet the inclusion criteria, but which were excluded, and explain why they were excluded.                                                                                                                                                          | Supplementary p23-3                    |
| Study characteristics                          | 17     | Cite each included study and present its characteristics.                                                                                                                                                                                                                            | p10-11, Table 1, 2                     |
| Risk of bias in studies                        | 18     | Present assessments of risk of bias for each included study.                                                                                                                                                                                                                         | p15, Supplementary eTable 5            |
| Results of individual studies                  | 19     | For all outcomes, present, for each study: (a) summary statistics for each group (where appropriate) and (b) an effect estimate and its precision (e.g. confidence/credible interval), ideally using structured tables or plots.                                                     | p15, Supplementary eTable 5            |
| Results of syntheses                           | 20a    | For each synthesis, briefly summarise the characteristics and risk of bias among contributing studies.                                                                                                                                                                               | Figure 2, 3, Supplementary eFigure 1-5 |
|                                                | 20b    | Present results of all statistical syntheses conducted. If meta-analysis was done, present for each the summary estimate and its precision (e.g. confidence/credible interval) and measures of statistical heterogeneity. If comparing groups, describe the direction of the effect. | p 11-13 Supplementary p3               |
|                                                | 20c    | Present results of all investigations of possible causes of heterogeneity among study results.                                                                                                                                                                                       | p 11-13 Supplementary p3               |
|                                                | 20d    | Present results of all sensitivity analyses conducted to assess the robustness of the synthesized results.                                                                                                                                                                           | NA                                     |
| Reporting biases                               | 21     | Present assessments of risk of bias due to missing results (arising from reporting biases) for each synthesis assessed.                                                                                                                                                              | Supplementary eTable 5                 |
| Certainty of evidence                          | 22     | Present assessments of certainty (or confidence) in the body of evidence for each outcome assessed.                                                                                                                                                                                  | p 11-13 Supplementary p3               |
| <b>DISCUSSION</b>                              |        |                                                                                                                                                                                                                                                                                      |                                        |
| Discussion                                     | 23a    | Provide a general interpretation of the results in the context of other evidence.                                                                                                                                                                                                    | p14                                    |
|                                                | 23b    | Discuss any limitations of the evidence included in the review.                                                                                                                                                                                                                      | p15-16                                 |
|                                                | 23c    | Discuss any limitations of the review processes used.                                                                                                                                                                                                                                | p16                                    |
|                                                | 23d    | Discuss implications of the results for practice, policy, and future research.                                                                                                                                                                                                       | p17                                    |
| <b>OTHER INFORMATION</b>                       |        |                                                                                                                                                                                                                                                                                      |                                        |
| Registration and protocol                      | 24a    | Provide registration information for the review, including register name and registration number, or state that the review was not registered.                                                                                                                                       | p7                                     |
|                                                | 24b    | Indicate where the review protocol can be accessed, or state that a protocol was not prepared.                                                                                                                                                                                       | p7                                     |
|                                                | 24c    | Describe and explain any amendments to information provided at registration or in the protocol.                                                                                                                                                                                      | NA                                     |
| Support                                        | 25     | Describe sources of financial or non-financial support for the review, and the role of the funders or sponsors in the review.                                                                                                                                                        | p18                                    |
| Competing interests                            | 26     | Declare any competing interests of review authors.                                                                                                                                                                                                                                   | p18                                    |
| Availability of data, code and other materials | 27     | Report which of the following are publicly available and where they can be found: template data collection forms; data extracted from included studies; data used for all analyses; analytic code; any other materials used in the review.                                           |                                        |

From: Page MJ, McKenzie JE, Bossuyt PM, Boutron I, Hoffmann TC, Mulrow CD, et al. The PRISMA 2020 statement: an updated guideline for reporting systematic reviews. *BMJ* 2021;372:n71. doi: 10.1136/bmj.n71

For peer review only - <http://bmjopen.bmj.com/site/about/guidelines.xhtml>  
For more information, visit: <http://www.prisma-statement.org/>
