# Supplementary material for: Diagnostic reliability in teledermatology: a systematic review and a meta-analysis
Source: PubMed Central journal article supplement — BMJ Open. 2023 Aug 11;13(8):e068207. doi: 10.1136/bmjopen-2022-068207 (PMC10423833; doi:10.1136/bmjopen-2022-068207), 2023-08-11
Supplement: bmjopen-2022-068207supp001.pdf [file bmjopen-2022-068207supp001.pdf]

## 1 **Supplementary Online Content**

2  
3 **Title:** Diagnostic Reliability in Teledermatology: A Systematic Review and Meta-Analysis

### 4 5 6 **Authors**

7 Adrienn N. Bourkas\*<sup>1</sup> (MSc), Natasha Barone\*<sup>2</sup> (MD, MSc), Matthew E.C. Bourkas<sup>3</sup> (PhD), Matthew Mannarino<sup>4</sup>  
8 (PhD), Robert D. J. Fraser<sup>5,6</sup> (RN, MN), Amy Lorincz (MSc), Sheila C. Wang<sup>5,7</sup> (MD, PhD), Jose L. Ramirez-  
9 GarciaLuna<sup>4</sup> (MD, PhD)

10 \* Authors contributed equally

### 11 12 **Affiliations**

13 <sup>1</sup>Faculty of Health Sciences, Queen's University School of Medicine, Kingston, Ontario, Canada

14 <sup>2</sup>Faculty of Medicine and Health Sciences, McGill University, Montreal, Quebec, Canada

15 <sup>3</sup>Temerty Faculty of Medicine, Department of Biochemistry, University of Toronto, Toronto, Ontario, Canada

16 <sup>4</sup>Department of Surgery, McGill University, Montreal, Quebec, Canada

17 <sup>5</sup>Swift Medical Inc., Toronto, Ontario, Canada

18 <sup>6</sup>Arthur Labatt Family School of Nursing, Western University, London, Ontario Canada

19 <sup>7</sup>Department of Medicine, Division of Dermatology, McGill University Health Centre, Montreal, Quebec, Canada

20  
21

## 22 **Supplementary eMethods**

23

24

### **Search Strategy**

25

26

27

28

29

The search strategy was written for Ovid Medline and translated using each database's syntax, controlled vocabulary, and search fields. MeSH terms, Emtree terms, and free text words were used for tele dermatology and skin conditions such as melanoma and related synonyms. To identify additional articles not captured through the aforementioned search, a manual search was conducted via reference search of the included studies.

30

31

32

33

All database records were downloaded to EndNote X9 (Clarivate) and uploaded to web-based software for deduplication, screening, and full-text evaluation (Covidence; Veritas Health Innovation). We contacted three study authors to gain access to their published work.(1, 2, 3) The search strategy is available below.

34

### **Ovid MEDLINE Search**

35

36

37

Ovid MEDLINE(R) and Epub Ahead of Print, In-Process, In-Data-Review & Other Non-Indexed Citations and Daily <1946 to 2022 May 02>

38

39

40

41

42

43

44

45

46

47

48

49

50

51

52

53

54

55

56

57

58

59

60

61

62

63

64

65

66

67

68

69

70

71

72

73

74

75

76

|    |                                           |        |
|----|-------------------------------------------|--------|
| 1  | e consult*.mp.                            | 322    |
| 2  | econsult*.mp.                             | 218    |
| 3  | electronic consult*.mp.                   | 366    |
| 4  | e health.mp.                              | 4095   |
| 5  | ehealth.mp.                               | 6823   |
| 6  | e visit*.mp.                              | 88     |
| 7  | evisit*.mp.                               | 26     |
| 8  | home video visit*.mp.                     | 4      |
| 9  | internet/ or internet-based intervention/ | 82046  |
| 10 | internet.mp.                              | 128675 |
| 11 | offsite care.mp.                          | 4      |
| 12 | off site care.mp.                         | 9      |
| 13 | ontario telemedicine network.mp.          | 19     |
| 14 | Remote Consultation/                      | 5689   |
| 15 | remote consultation*.mp.                  | 6406   |
| 16 | remote visit*.mp.                         | 95     |
| 17 | tele care.mp.                             | 40     |
| 18 | telecare.mp.                              | 945    |
| 19 | tele consult*.mp.                         | 208    |
| 20 | teleconsult*.mp.                          | 2208   |
| 21 | tele diagnos*.mp.                         | 46     |
| 22 | telehealth.mp.                            | 13222  |
| 23 | tele health.mp.                           | 287    |
| 24 | telemedicine/                             | 36763  |
| 25 | telemedicine.mp.                          | 47751  |
| 26 | tele medicine.mp.                         | 197    |
| 27 | telemonitor*.mp.                          | 2380   |
| 28 | tele monitor*.mp.                         | 209    |
| 29 | Telepathology/                            | 918    |
| 30 | telepatholog*.mp.                         | 1223   |
| 31 | tele patholog*.mp.                        | 25     |
| 32 | telepractice*.mp.                         | 276    |
| 33 | tele practice*.mp.                        | 16     |
| 34 | Therapy, Computer-Assisted/               | 6969   |
| 35 | video consult*.mp.                        | 827    |
| 36 | videoconsult*.mp.                         | 41     |
| 37 | virtual care.mp.                          | 1177   |
| 38 | web based.mp.                             | 42402  |
| 39 | Telepathology/                            | 918    |

77 40 or/1-39 216985  
 78 41 Dermatology/21077  
 79 42 dermatolog\*.mp. 110593  
 80 43 dermatopatholog\*.mp. 2990  
 81 44 exp Skin Diseases/di [Diagnosis] 196739  
 82 45 exp Skin Neoplasms/ 142454  
 83 46 skin.mp. 880457  
 84 47 exp Skin Abnormalities/ 34228  
 85 48 burns/ or burns, chemical/ or burns, electric/ or sunburn/ 59533  
 86 49 burn\*.mp. 141877  
 87 50 wound healing/ or cicatrix/ 127484  
 88 51 wound\*.mp. 446154  
 89 52 or/41-51 1580012  
 90 53 40 and 52 7160  
 91 54 teledermatolog\*.mp. 1273  
 92 55 tele dermatolog\*.mp. 35  
 93 56 54 or 55 1298  
 94 57 53 or 56 7448  
 95 58 limit 57 to dt=20100101-20220501 [January 1st, 2010 to May 1st, 2022] 4972  
 96  
 97

98  
 99

#### Embase Search

99 Embase Classic+Embase <1947 to 2021 July 15>  
 100 1 computer assisted therapy/ 4772  
 101 2 e consult\*.mp. 411  
 102 3 econsult\*.mp. 283  
 103 4 electronic consult\*.mp. 461  
 104 5 e health.mp. 4440  
 105 6 ehealth.mp. 5099  
 106 7 e visit\*.mp. 83  
 107 8 evisit\*.mp. 30  
 108 9 home video visit\*.mp. 10  
 109 10 internet/ or web-based intervention/ 114861  
 110 11 internet.mp. 143810  
 111 12 offsite care.mp. 5  
 112 13 off site care.mp. 12  
 113 14 ontario telemedicine network.mp. 36  
 114 15 remote consultation\*.mp. 808  
 115 16 remote visit\*.mp. 79  
 116 17 tele care.mp. 55  
 117 18 telecare.mp. 983  
 118 19 teleconsultation/ 11686  
 119 20 tele consult\*.mp. 243  
 120 21 teleconsult\*.mp. 12352  
 121 22 tele diagnos\*.mp. 53  
 122 23 telehealth.mp. 15276  
 123 24 tele health.mp. 389  
 124 25 telemedicine/ 31867  
 125 26 telemedicine.mp. 38951  
 126 27 tele medicine.mp. 333  
 127 28 telemonitor\*.mp. 4838  
 128 29 tele monitor\*.mp. 344  
 129 30 Telepathology/ 869  
 130 31 telepatholog\*.mp. 1265  
 131 32 tele patholog\*.mp. 41  
 132 33 telepractice\*.mp. 162

133 34 tele practice\*.mp. 9  
 134 35 video consult\*.mp. 751  
 135 36 videoconsult\*.mp. 54  
 136 37 virtual care.mp. 496  
 137 38 web based.mp. 49157  
 138 39 or/1-38 240118  
 139 40 dermatology/ or cosmetic dermatology/ or pediatric dermatology/ or psychodermatology/ 51419  
 140 41 dermatolog\*.mp. 161210  
 141 42 dermatopatholog\*.mp. 3737  
 142 43 burn/ or burn contracture/ or electric burn/ or face burn/ or hand burn/ or ionizing radiation burn/ or scald/ or  
 143 sunburn/ 74890  
 144 44 burn\*.mp. 189010  
 145 45 exp skin disease/di [Diagnosis] 209136  
 146 46 exp skin tumor/ 213775  
 147 47 skin\*.mp. 1294867  
 148 48 or/40-47 1665263  
 149 49 39 and 48 7063  
 150 50 teledermatology/ 1295  
 151 51 tele dermatolog\*.mp. 42  
 152 52 teledermatolog\*.mp. 1798  
 153 53 50 or 51 or 52 1812  
 154 54 49 or 53 8004  
 155 55 limit 54 to (books or chapter or conference abstract or conference paper or "conference review") 1828  
 156 56 54 not 55 6176  
 157 57 limit 56 to yr="2010 -Current" 4505  
 158  
 159 **Cochrane Search**  
 160 EBM Reviews - Cochrane Database of Systematic Reviews <2005 to July 14, 2021> EBM Reviews - ACP Journal  
 161 Club <1991 to June 2021> EBM Reviews - Database of Abstracts of Reviews of Effects <1st Quarter 2016> EBM  
 162 Reviews - Cochrane Clinical Answers <June 2021> EBM Reviews - Cochrane Central Register of Controlled Trials  
 163 <June 2021> EBM Reviews - Cochrane Methodology Register <3rd Quarter 2012> EBM Reviews - Health  
 164 Technology Assessment <4th Quarter 2016> EBM Reviews - NHS Economic Evaluation Database <1st Quarter  
 165 2016>  
 166 1 e consult\*.mp. 44  
 167 2 econsult\*.mp. 22  
 168 3 electronic consult\*.mp. 29  
 169 4 e health.mp. 617  
 170 5 ehealth.mp. 766  
 171 6 e visit\*.mp. 14  
 172 7 evisit\*.mp. 1  
 173 8 home video visit\*.mp. 3  
 174 9 internet/ or internet-based intervention/ 4,275  
 175 10 internet.mp. 15,059  
 176 11 offsite care.mp. 2  
 177 12 off site care.mp. 2  
 178 13 ontario telemedicine network.mp. 7  
 179 14 Remote Consultation/ 460  
 180 15 remote consultation\*.mp. 551  
 181 16 remote visit\*.mp. 17  
 182 17 tele care.mp. 34  
 183 18 telecare.mp. 249  
 184 19 tele consult\*.mp. 59  
 185 20 teleconsult\*.mp. 822  
 186 21 tele diagnos\*.mp. 4  
 187 22 telehealth.mp. 2,308  
 188 23 tele health.mp. 128

|     |    |                                                                                                                                                                                                                                                                                                                                                                                                                                                         |         |
|-----|----|---------------------------------------------------------------------------------------------------------------------------------------------------------------------------------------------------------------------------------------------------------------------------------------------------------------------------------------------------------------------------------------------------------------------------------------------------------|---------|
| 189 | 24 | telemedicine/                                                                                                                                                                                                                                                                                                                                                                                                                                           | 2,617   |
| 190 | 25 | telemedicine.mp.                                                                                                                                                                                                                                                                                                                                                                                                                                        | 4,819   |
| 191 | 26 | tele medicine.mp.                                                                                                                                                                                                                                                                                                                                                                                                                                       | 57      |
| 192 | 27 | telemonitor*.mp.                                                                                                                                                                                                                                                                                                                                                                                                                                        | 1,236   |
| 193 | 28 | tele monitor*.mp.                                                                                                                                                                                                                                                                                                                                                                                                                                       | 115     |
| 194 | 29 | Telepathology/                                                                                                                                                                                                                                                                                                                                                                                                                                          | 8       |
| 195 | 30 | telepatholog*.mp.                                                                                                                                                                                                                                                                                                                                                                                                                                       | 22      |
| 196 | 31 | tele patholog*.mp.                                                                                                                                                                                                                                                                                                                                                                                                                                      | 2       |
| 197 | 32 | telepractice*.mp.                                                                                                                                                                                                                                                                                                                                                                                                                                       | 37      |
| 198 | 33 | tele practice*.mp.                                                                                                                                                                                                                                                                                                                                                                                                                                      | 0       |
| 199 | 34 | Therapy, Computer-Assisted/                                                                                                                                                                                                                                                                                                                                                                                                                             | 1,391   |
| 200 | 35 | video consult*.mp.                                                                                                                                                                                                                                                                                                                                                                                                                                      | 117     |
| 201 | 36 | videoconsult*.mp.                                                                                                                                                                                                                                                                                                                                                                                                                                       | 8       |
| 202 | 37 | virtual care.mp.                                                                                                                                                                                                                                                                                                                                                                                                                                        | 31      |
| 203 | 38 | web based.mp.                                                                                                                                                                                                                                                                                                                                                                                                                                           | 9,110   |
| 204 | 39 | Telepathology/                                                                                                                                                                                                                                                                                                                                                                                                                                          | 8       |
| 205 | 40 | or/1-39                                                                                                                                                                                                                                                                                                                                                                                                                                                 | 29,268  |
| 206 | 41 | Dermatology/                                                                                                                                                                                                                                                                                                                                                                                                                                            | 124     |
| 207 | 42 | dermatolog*.mp.                                                                                                                                                                                                                                                                                                                                                                                                                                         | 10,838  |
| 208 | 43 | dermatopatholog*.mp.                                                                                                                                                                                                                                                                                                                                                                                                                                    | 80      |
| 209 | 44 | exp Skin Diseases/di [Diagnosis]                                                                                                                                                                                                                                                                                                                                                                                                                        | 630     |
| 210 | 45 | exp Skin Neoplasms/                                                                                                                                                                                                                                                                                                                                                                                                                                     | 1,738   |
| 211 | 46 | skin.mp.                                                                                                                                                                                                                                                                                                                                                                                                                                                | 67,534  |
| 212 | 47 | exp Skin Abnormalities/                                                                                                                                                                                                                                                                                                                                                                                                                                 | 269     |
| 213 | 48 | burns/ or burns, chemical/ or burns, electric/ or sunburn/                                                                                                                                                                                                                                                                                                                                                                                              | 1,779   |
| 214 | 49 | burn*.mp.                                                                                                                                                                                                                                                                                                                                                                                                                                               | 12,780  |
| 215 | 50 | wound healing/ or cicatrix/                                                                                                                                                                                                                                                                                                                                                                                                                             | 5,677   |
| 216 | 51 | wound*.mp.                                                                                                                                                                                                                                                                                                                                                                                                                                              | 35,982  |
| 217 | 52 | or/41-51                                                                                                                                                                                                                                                                                                                                                                                                                                                | 110,390 |
| 218 | 53 | 40 and 52                                                                                                                                                                                                                                                                                                                                                                                                                                               | 1,622   |
| 219 | 54 | teledermatolog*.mp.                                                                                                                                                                                                                                                                                                                                                                                                                                     | 149     |
| 220 | 55 | tele dermatolog*.mp.                                                                                                                                                                                                                                                                                                                                                                                                                                    | 20      |
| 221 | 56 | 54 or 55                                                                                                                                                                                                                                                                                                                                                                                                                                                | 151     |
| 222 | 57 | 53 or 56                                                                                                                                                                                                                                                                                                                                                                                                                                                | 1,684   |
| 223 | 58 | limit 57 to yr="2010 -Current"                                                                                                                                                                                                                                                                                                                                                                                                                          | 1,377   |
| 224 |    |                                                                                                                                                                                                                                                                                                                                                                                                                                                         |         |
| 225 |    | <b>CINAHL Search</b>                                                                                                                                                                                                                                                                                                                                                                                                                                    |         |
| 226 |    | Searched keyword teledermatology and set limit to yr="2010-Current"                                                                                                                                                                                                                                                                                                                                                                                     | 357     |
| 227 |    |                                                                                                                                                                                                                                                                                                                                                                                                                                                         |         |
| 228 |    | <b>MedRxiv Search</b>                                                                                                                                                                                                                                                                                                                                                                                                                                   |         |
| 229 |    | Searched keyword teledermatology and set limit to yr="2010-Current"                                                                                                                                                                                                                                                                                                                                                                                     | 13      |
| 230 |    |                                                                                                                                                                                                                                                                                                                                                                                                                                                         |         |
| 231 |    | <b>Eligibility Criteria</b>                                                                                                                                                                                                                                                                                                                                                                                                                             |         |
| 232 |    | Inclusion and exclusion criteria are summarized in <b>eTable 2</b> .                                                                                                                                                                                                                                                                                                                                                                                    |         |
| 233 |    |                                                                                                                                                                                                                                                                                                                                                                                                                                                         |         |
| 234 |    | <b>Data Selection and Extraction</b>                                                                                                                                                                                                                                                                                                                                                                                                                    |         |
| 235 |    | Information extracted from full-text articles is summarized in <b>eTable 3</b> .                                                                                                                                                                                                                                                                                                                                                                        |         |
| 236 |    |                                                                                                                                                                                                                                                                                                                                                                                                                                                         |         |
| 237 |    | <b>Data Analysis and Synthesis</b>                                                                                                                                                                                                                                                                                                                                                                                                                      |         |
| 238 |    | In this study, a letter was assigned to each unique study grouping as explained in <b>eTable 4</b> . For both the percentage of agreement and kappa values, forest plots, the I <sup>2</sup> index, and the τ <sup>2</sup> statistic were used in combination to investigate statistical heterogeneity. To evaluate the statistical significance of differences between kappa values, we performed meta-regressions and derived corresponding p-values. |         |
| 239 |    |                                                                                                                                                                                                                                                                                                                                                                                                                                                         |         |
| 240 |    |                                                                                                                                                                                                                                                                                                                                                                                                                                                         |         |
| 241 |    |                                                                                                                                                                                                                                                                                                                                                                                                                                                         |         |
| 242 |    |                                                                                                                                                                                                                                                                                                                                                                                                                                                         |         |

243 Cohen's kappa values for diagnostic concordance between teledermatology and F2F physicians were interpreted based  
244 on the following criteria.(4) Values between 0–.20 indicate no agreement, .21–.39 minimal agreement, .40–.59 weak  
245 agreement, .60–.79 moderate agreement, .80–.90 strong agreement, and above .90 almost perfect agreement.  
246

247 Sub-group analysis included different skin conditions, specialization of the F2F physician, whether staff were trained  
248 on image acquisition, the technology used for image acquisition, the use of teledermoscopy, studies conducted pre- or  
249 post-pandemic, and the risk of bias. Confounding factors, such as technology type, year of publication, and training  
250 of study raters, were controlled using meta-regression.  
251

252 Proportions meta-analysis looked at weighted averages, and 95% confidence intervals were reported. Given the unique  
253 properties of proportional data and the considerable heterogeneity observed, conventional publication bias tests,  
254 specifically designed for comparative data, were not considered applicable. As such, statistical pursuit of publication  
255 bias was not undertaken. Instead, a methodologically appropriate qualitative assessment of publication bias was  
256 implemented for this type of analysis. This approach was deemed to provide the most accurate and robust outcome.

## 257 **Supplementary eResults**

258

259 Our analysis incorporated forty-four relevant studies. Key study and participant details are summarized in **eTable 1**,  
260 with a concise overview provided in the main text. Articles excluded based on our criteria are listed in **eTable 5**.

261

### 262 **Diagnostic reliability of teledermatology when compared to F2F (specialist and non-specialists) evaluation**

263 Of the 40 studies that reported diagnostic agreement rates there were 72 unique comparisons made between F2F and  
264 teledermatology.(5, 6, 7, 8, 9, 10, 11, 12, 13, 14, 15, 16, 17, 18, 19, 20, 21, 22, 23, 24, 25, 26, 27, 28, 29, 30, 31, 32,  
265 33, 34, 35, 36, 37, 38, 39, 40, 41, 42, 43, 44) **eFigure 1A** shows that the mean percentage agreement of 68.9% (CI  
266 64.4%-73.1%) ranged from 14% to 98%, where 35/72 had percentage agreement above 70% and 7 studies had over  
267 90% agreement. The studies were heterogeneous ( $I^2=98%$ ,  $p < 0$ ).

268

269 Of the 21 studies that reported concordance values, there were 45 unique comparisons made.(5, 6, 11, 14, 17, 20, 21,  
270 22, 23, 24, 25, 28, 29, 32, 33, 34, 45, 46, 47, 48, 49) **eFigure 1B** shows that the mean diagnostic concordance of 0.67  
271 (CI 0.60 to 0.74) ranged from 0.213 (CI 0.20 to 0.23) to 0.96 (CI 0.92 to 0.98), with 21 studies (47%) having moderate  
272 agreement ( $k=0.6$  and above), and 13 (29%) studies having strong agreement. The studies were heterogeneous  
273 ( $I^2=100%$ ,  $p < 0.001$ ).

274

### 275 **Diagnostic agreement between teledermatologist and teledermatologist, F2F and F2F, and teledermatology 276 and histopathology**

277 Of the ten studies that reported diagnostic agreement rates between telermatologists, there were 17 unique comparisons  
278 made between F2F and teledermatology consults. **eFigure 2A** shows the mean percentage agreement of 76.4% (CI  
279 69% to 82.5%) ranged from 37% to 91.5%, with 10/17 having percentage agreement above 70% and two studies  
280 having over 90% agreement. The studies were heterogeneous ( $I^2=97%$ ,  $p < 0.001$ ).

281

282 From four studies that reported diagnostic agreement rates between F2F dermatologists there were 6 unique  
283 comparisons. **eFigure 2B** shows that the mean percentage agreement 82.4% (CI 76.7%-87.0%) ranged from 75.5% to  
284 91%. The studies were heterogeneous ( $I^2=68%$ ,  $p < 0.001$ ).

285

286 Five studies compared teledermatology to histopathology data, and there were six unique comparisons. **eFigure 2C**  
287 shows that the mean percentage agreement of 55.7% (CI 53% to 58.4%) ranged from 53.8% to 65.4%. The mean  
288 agreement rate between histopathology and teledermatology was 55.7% (CI 53.0 to 58.4). The studies were  
289 homogeneous ( $I^2=0%$ ,  $p = 0.49$ ).

290

## 291 **Subgroup analyses**

292

### 293 **Diagnostic reliability of teledermatology vs F2F specialist and non-specialist**

294

295 Within the same modality, **eFigure 3A** shows that teledermatologists had a diagnostic agreement rate of 70.96% (CI  
296 69.8% to 72.1%) with F2F dermatologists, while the agreement rate with F2F non-specialists was 44.1% (CI 39.9%  
297 to 48.4%). Comparing telermatologists to non-specialists showed significantly lower agreement among non-specialists  
298 ( $p < 0.001$ , heterogeneity:  $I^2 = 98%$ ). Among 35 studies reporting diagnostic agreement rates, 44 out of 64  
299 comparisons between teledermatology and F2F dermatologists had a percentage agreement above 60%, with seven  
300 studies reporting over 90% agreement. The mean kappa concordance value for diagnostic agreement between  
301 teledermatology and F2F dermatologists shown in **eFigure 3B** was 0.69 (CI 0.60 to 0.75). Additionally,  
302 telermatologists had a mean concordance value of 0.52 (CI 0.25 to 0.71) when compared to non-specialists. Non-  
303 specialists showed significantly lower diagnostic concordance compared to dermatologists for F2F vs.  
304 teledermatology ( $p = 0.031$ , heterogeneity:  $I^2 = 100%$ ). Moreover, studies comparing teledermatologists to F2F and  
305 teledermatology to histopathology showed a range of agreement rates, with heterogeneity observed in the former ( $I^2$   
306  $= 97%$ ,  $p < 0.001$ ) and homogeneity in the latter ( $I^2 = 0%$ ,  $p = 0.49$ ).

307

### 308 **Diagnostic reliability of teledermatology vs F2F by the inclusion of teledermoscopy in both teledermatology 309 and F2F assessments**

310 Overall, twelve studies with 22 unique comparisons used teledermoscopy for diagnosing suspicious lesions.(8, 11, 15,  
311 29, 32, 34, 38, 39, 42, 44) **eFigure 4A** shows that with teledermoscopy, the mean diagnostic agreement rates was  
312 69.1% (CI 66.8% to 71.4%), and this percentage ranged between from 31.6% to 92.3%. Without the use of

313 teledermoscopy, the mean agreement rate was 68.3% (CI 66.8% to 69.8%). The means were not significantly different  
314 between the two groups and the studies were heterogeneous ( $I^2=97%$ ,  $p<0.001$ ). **eFigure 4B** shows concordance  
315 values of seven studies that adapted teledermoscopy had a mean of 0.71 (CI 0.58 to 0.80). (11, 29, 32, 34, 39, 47, 48)  
316 Without teledermoscopy, the mean was 0.65 (CI 0.54 to 0.74). This difference was not statistically significant, and  
317 the studies were heterogeneous ( $I^2=100%$ ,  $p<0.001$ ).  
318

### 319 **Diagnostic reliability of teledermatology vs F2F by the inclusion of lesion category**

320 Twenty-six studies with 39 unique comparisons reporting percentage agreement rates that were inclusive to all lesion  
321 types as shown in **eFigure 5A**. (5, 6, 17, 22, 24, 25, 26, 28, 29, 30, 31, 32, 33, 36, 37, 40,  
322 41, 43) The mean percentage agreement was 69.9% (CI 67.9% to 71.7%) and ranged from 30.9% to 98%, with the  
323 majority (26/39) having percentage agreement above 60% and 4 studies having over 90%. Eleven studies only looked  
324 at suspicious lesions, (11, 12, 14, 20, 23, 34, 35, 38, 39, 42, 44) and the mean percentage agreement was 68.1% (CI  
325 66.3% to 69.8%). Three studies excluded skin cancers (13, 21, 27) and the mean percentage agreement was 62.2% (CI  
326 56.2% to 67.8%). No statistical significance could be identified between the three lesion groups and the studies were  
327 heterogeneous ( $I^2=98%$ ,  $p<0.001$ ).  
328

329 Concordance values for studies inclusive to all lesions seen in **eFigure 5B** were reported in ten studies with a mean  
330 of 0.62 (CI 0.48 to 0.74). (5, 6, 17, 22, 24, 25, 28, 29, 32, 33) Six studies that looked at cancerous skin lesions only  
331 reported a mean of 0.70 (CI 0.59 to 0.78). (11, 14, 20, 23, 34, 39) Only one study that looked at all lesions except  
332 cancerous ones reported a concordance value.<sup>22</sup> No statistical significance could be identified between the three lesion  
333 groups and the studies were heterogeneous ( $I^2=100%$ ,  $p<0.001$ ).  
334

### 335 **Diagnostic reliability of teledermatology vs F2F by pre- and post-pandemic timelines**

336 When comparing teledermatologists to all F2F physicians, the average agreement rate was 65.5% (CI 64.0-66.9) for pre-  
337 pandemic studies, and 75.3% (CI 73.4% to 77.2%) for studies published after January 2020. When the percentage  
338 agreements were compared between the two groups, they were not statistically significant ( $p = 0.421$ ) and also  
339 heterogeneous ( $I^2=98%$ ,  $p<0.001$ ). eTable not included.  
340

### 341 **Risk of bias and quality assessment**

342 The QUADAS-2 framework was utilized to evaluate bias and applicability across four essential domains, ensuring  
343 that our conclusions are both accurate and applicable to real-life clinical situations. **eTable 6A** summarizes the  
344 QUADAS-2 criteria tailored to this study.  
345

346 The results of quality assessment for risk of bias and applicability in individual studies are displayed in **eTable 6B-**  
347 **E**. Six of the studies had low risk of bias, nine had moderate risk, and 29 had high-risk of bias. There were no  
348 systematic differences between the results of studies that attempted to reduce risk of bias, compared with those with  
349 higher risk of bias. The mean diagnostic agreement rate between F2F and teledermatology was 66.4% (CI 62.4% to  
350 70.1%) for low risk, and 69.1% (CI 67.6% to 70.6%) for high risk ( $p = 0.932$ ). When the percentage agreements were  
351 compared between groups, they were heterogeneous ( $I^2=98%$ ,  $p<0.001$ ). eTable not included.  
352  
353



354 **Supplementary eFigures and Legends**

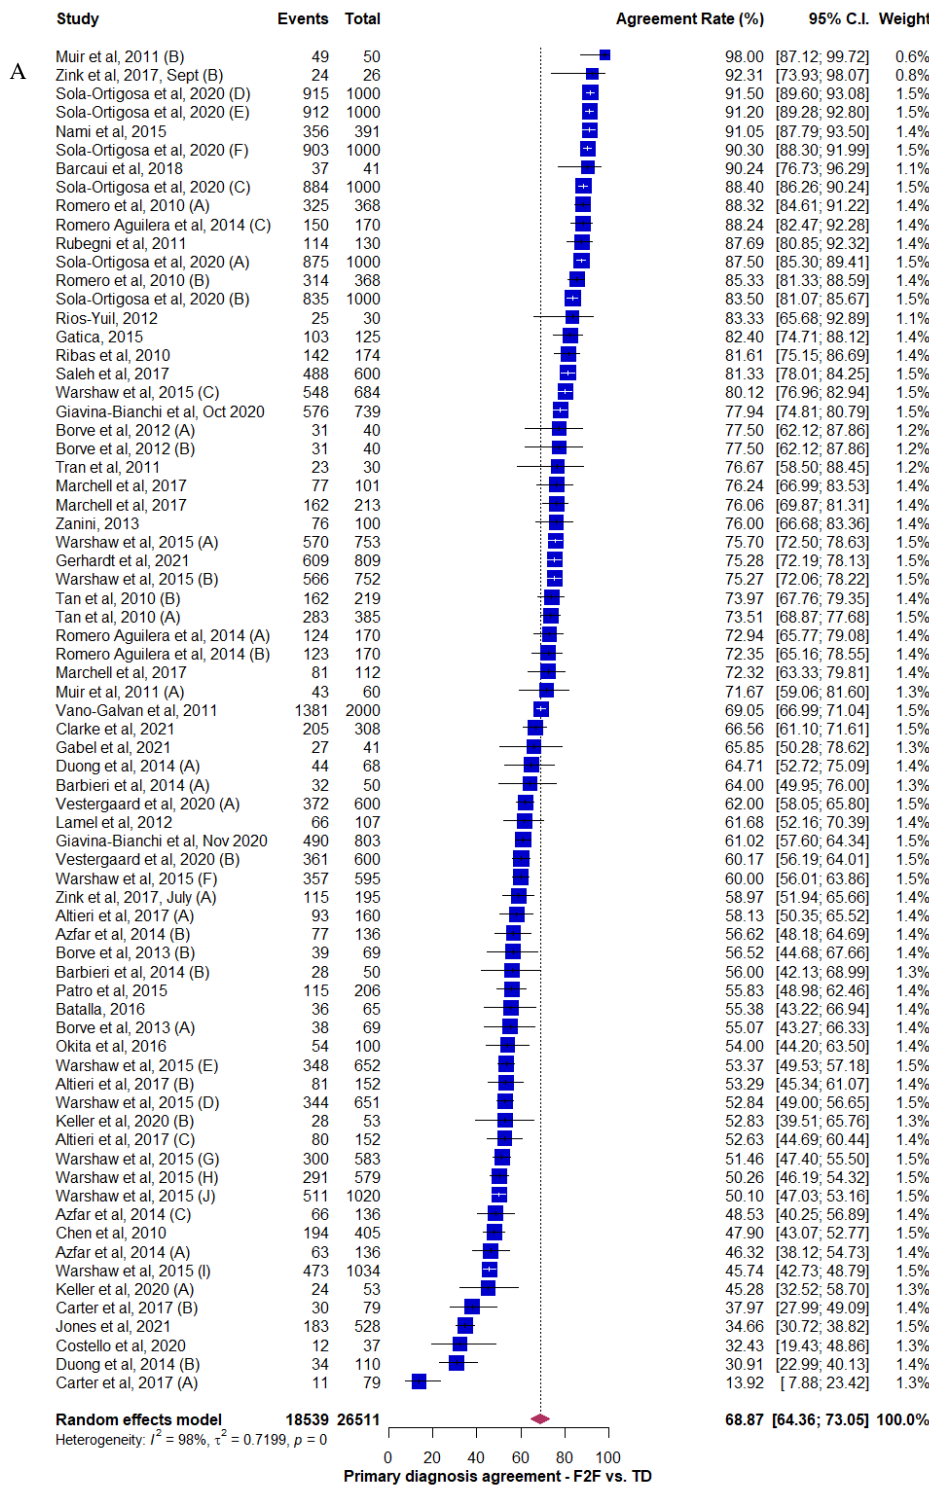

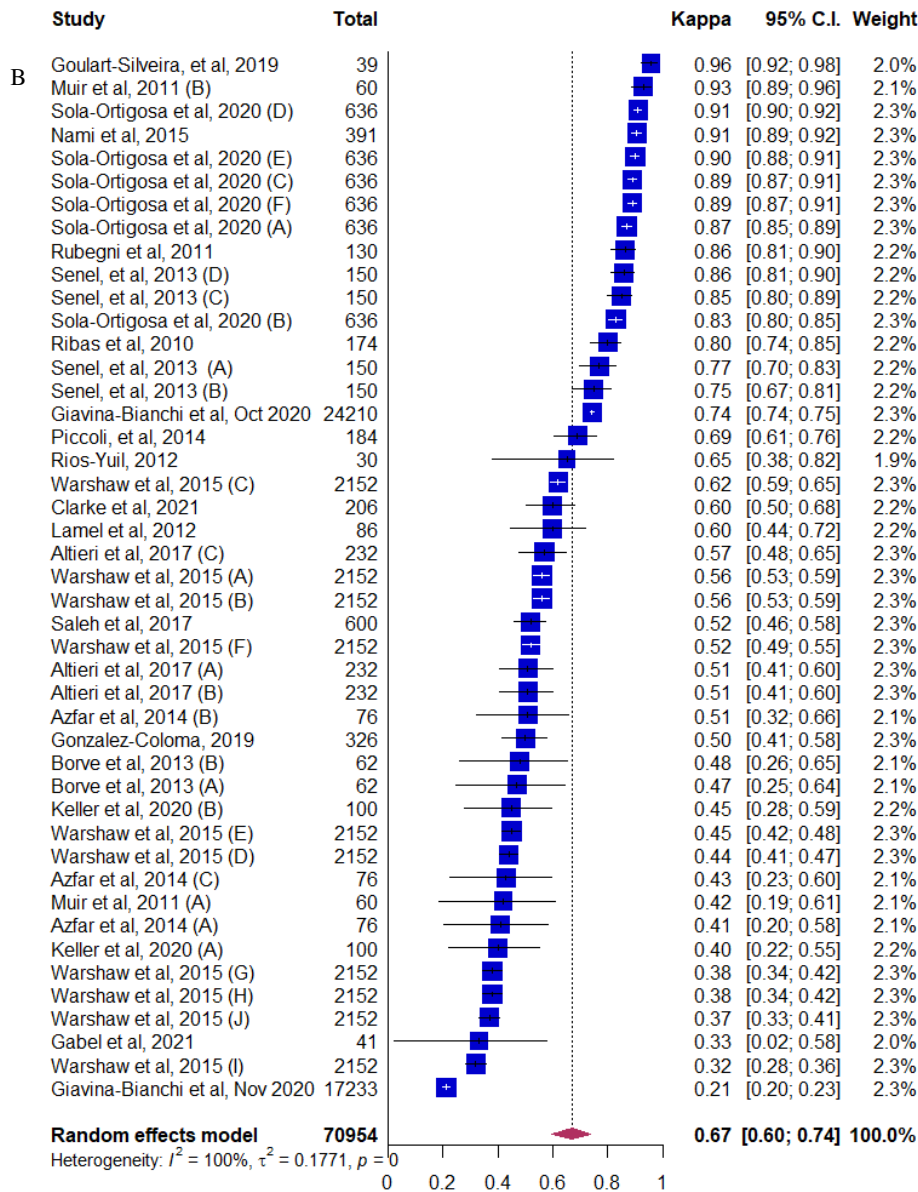

356  
357  
358  
359  
360  
361  
362  
363

**Figure 1. Forest plot representing F2F and teledermatology primary diagnostic agreement.** (A) Forest plot representing percentage agreement and 95% C.I. for overall concordance across 40 studies with a total of 72 unique number of comparisons, N of events and total included participants. (B) Forest plot representing kappa concordance and 95% C.I. for overall concordance across 21 studies with a total of 45 unique number of comparisons, N of total included participants. Abbreviations: F2F (Face-to-Face), PCP (Primary Care Provider), TD (Teledermatology or Teledermatologist).

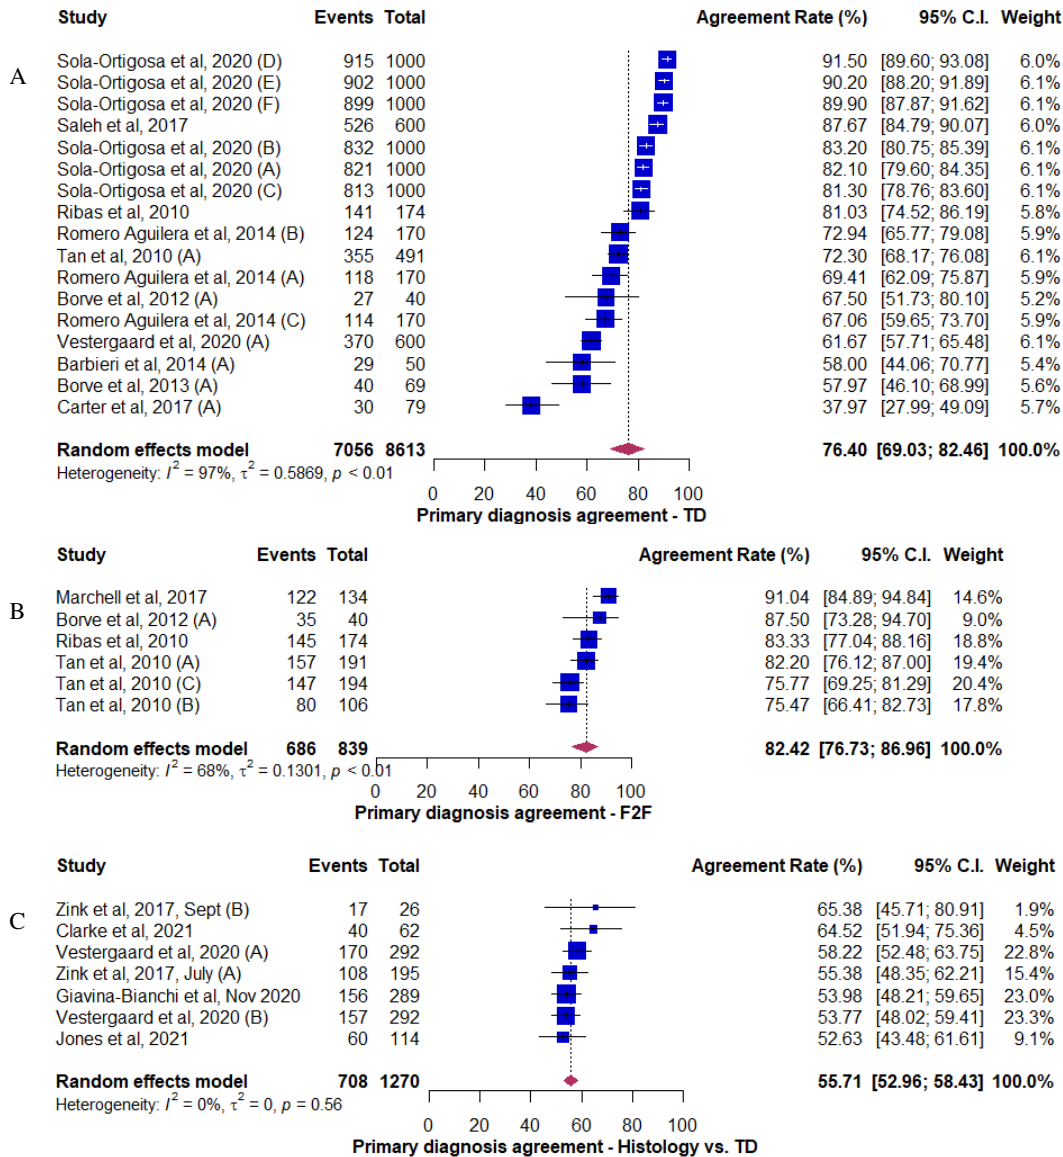

**eFigure 2. Forest plot representing teledermatologists, F2F physicians, and histopathology primary diagnostic agreements.** (A) Forest plot representing percentage agreement between teledermatologist and teledermatologist and 95% C.I. for overall concordance across ten studies with a total of 17 unique number of comparisons, N of events and total included participants. (B) Forest plot representing kappa concordance and 95% C.I. for overall concordance between two F2F physician diagnoses across four studies with a total of six unique number of comparisons, N of total included participants. (C) Forest plot representing percentage agreement between teledermatologists and histopathology with 95% C.I. for overall concordance across six studies, N of events and total included participants. Abbreviations: F2F (Face-to-Face), PCP (Primary Care Provider), TD (Teledermatology or Teledermatologist).

A

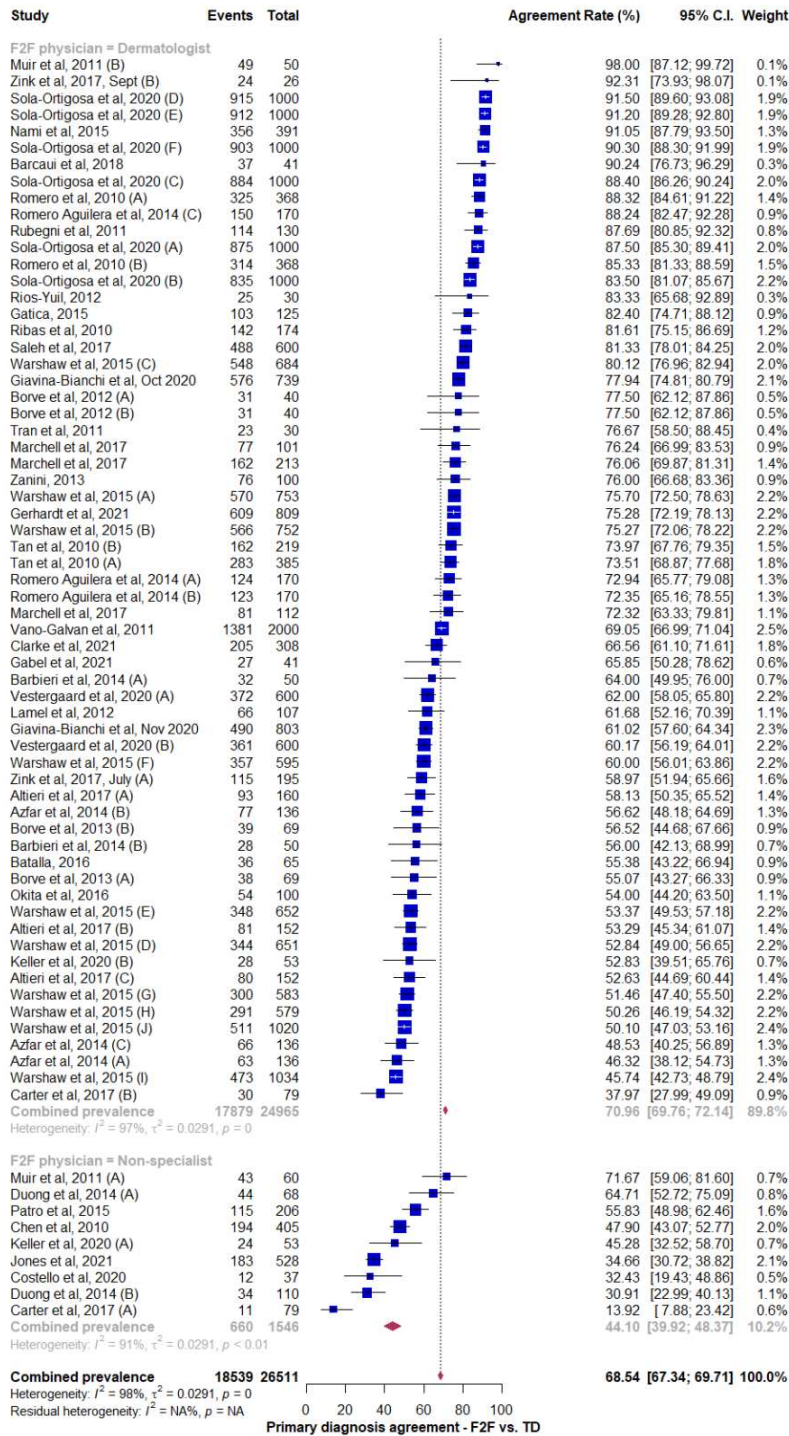



B

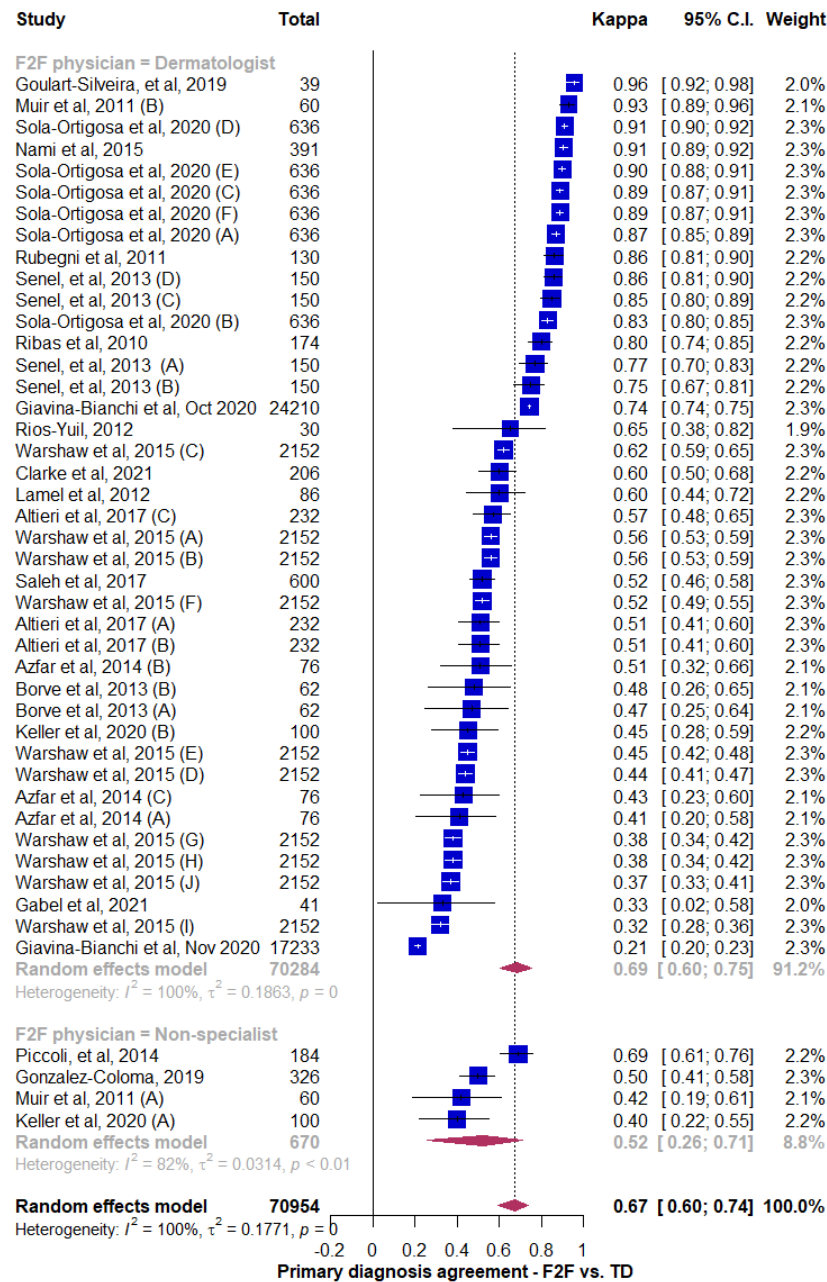

377  
378  
379  
380  
381  
382  
383

**eFigure 3. Forest plot representing F2F and teledermatology primary diagnostic agreement by specialization status of the F2F physician.** Studies were sorted into two groups, a) F2F diagnosis completed by a board-certified dermatologist; b) F2F diagnosis completed by a non-specialist (e.g., general practitioner). (A) Forest plot representing percentage agreement and 95% C.I. for overall concordance across 40 studies with a total of 72 unique number of comparisons, N of events and total included participants. (B) Forest plot representing kappa concordance and 95% C.I. for overall concordance across 21 studies with a total of 45 unique number of comparisons, N of total included

13

384 participants. Abbreviations: F2F (Face-to-Face), PCP (Primary Care Provider), TD (Teledermatology or  
385 Teledermatologist).  
386

A

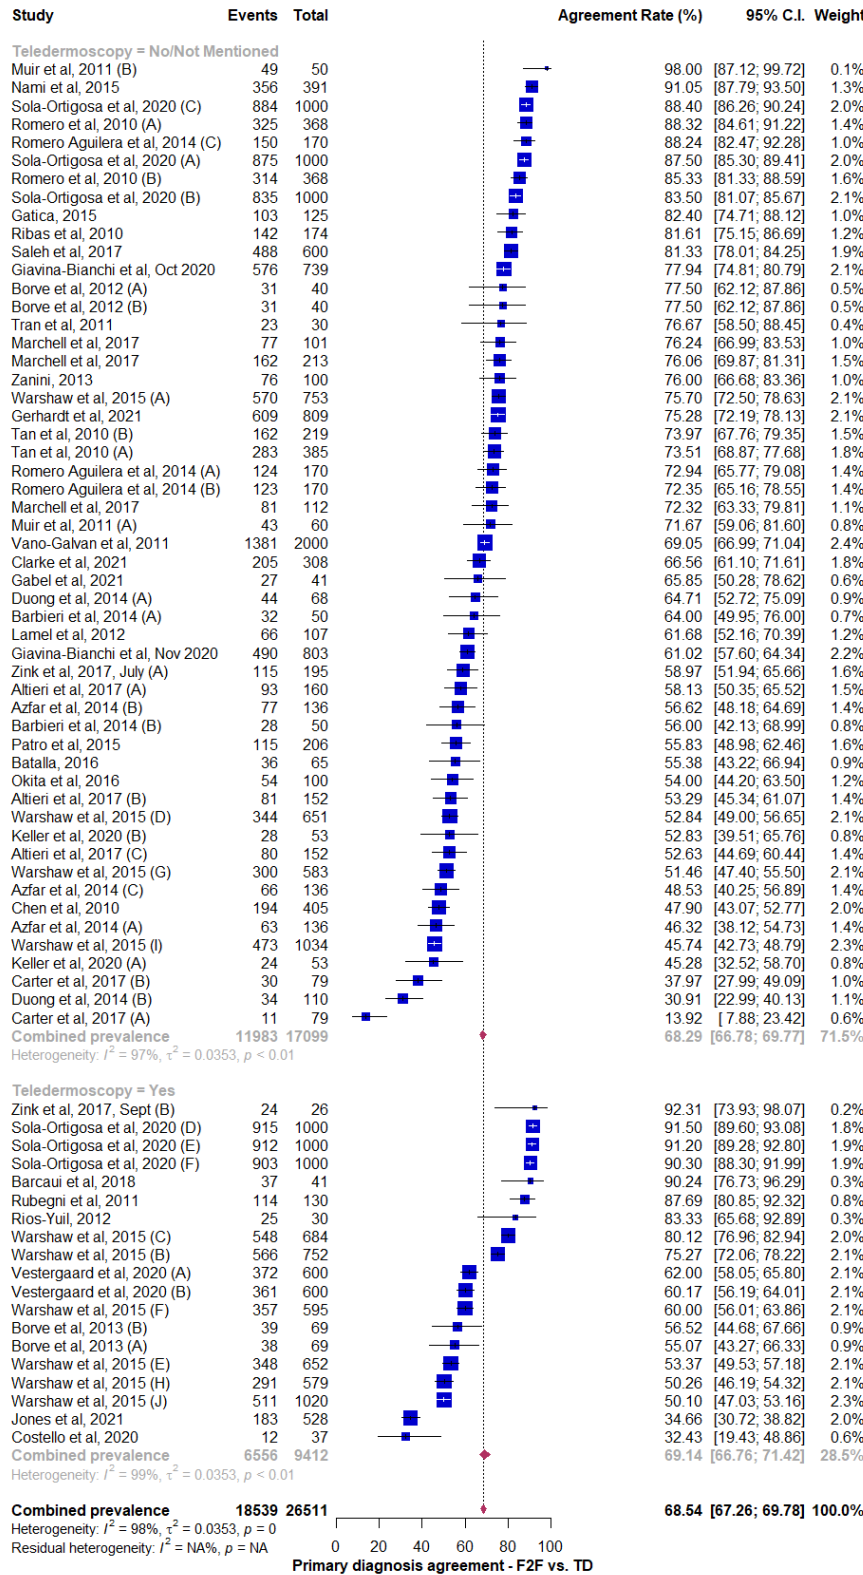

B

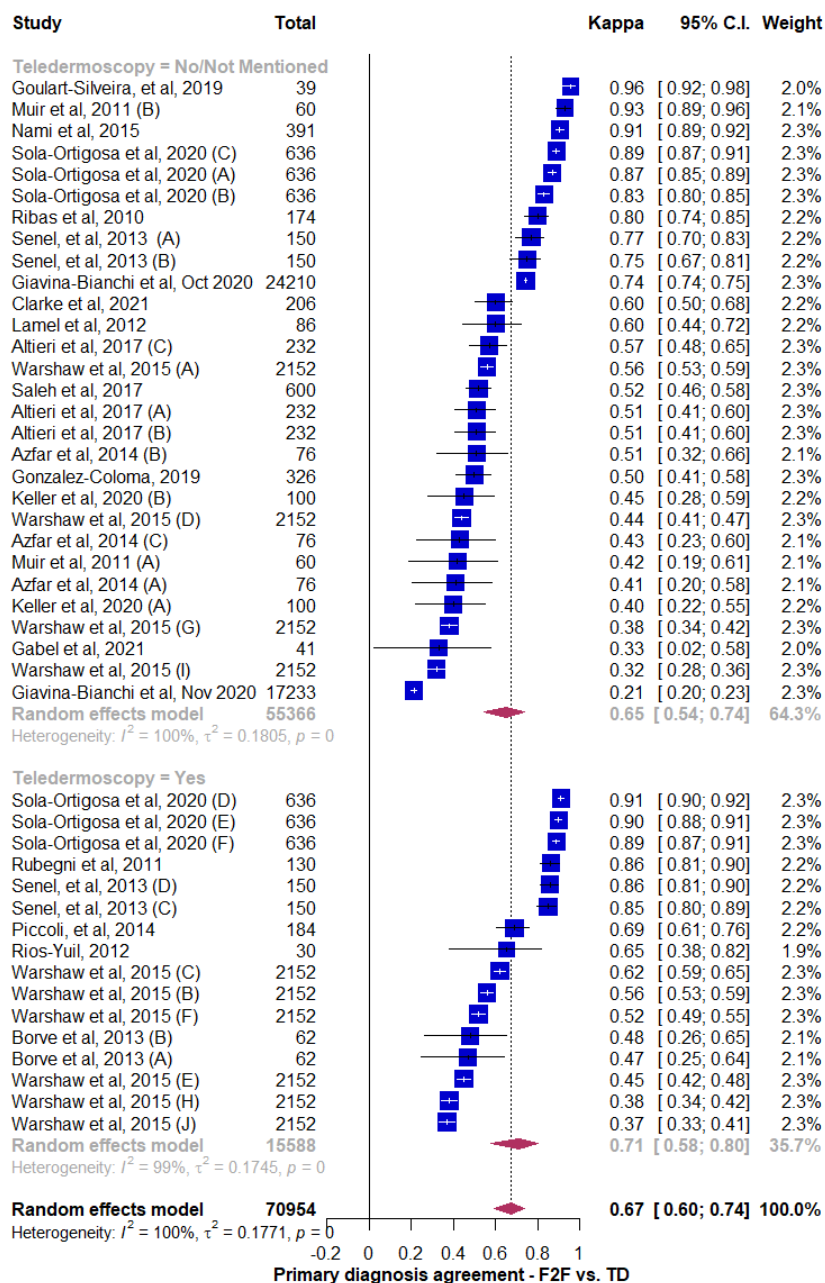

388  
389  
390  
391  
392  
393  
394  
395

**Figure 4. Forest plot representing F2F and teledermatology primary diagnostic agreement by utilization of teledermoscopy.** Studies were sorted into two groups, i) Did not use or did not report the use of teledermoscopy; ii) Used teledermoscopy. (A) Forest plot representing percentage agreement and 95% C.I. for overall concordance across 12 studies with a total of 22 unique number of comparisons, N of events and total included participants. (B) Forest plot representing kappa concordance and 95% C.I. for overall concordance across seven studies with a total of 16 unique number of comparisons, N of total included participants. Abbreviations: F2F (Face-to-Face), PCP (Primary Care Provider), TD (Teledermatology or Teledermatologist).



A

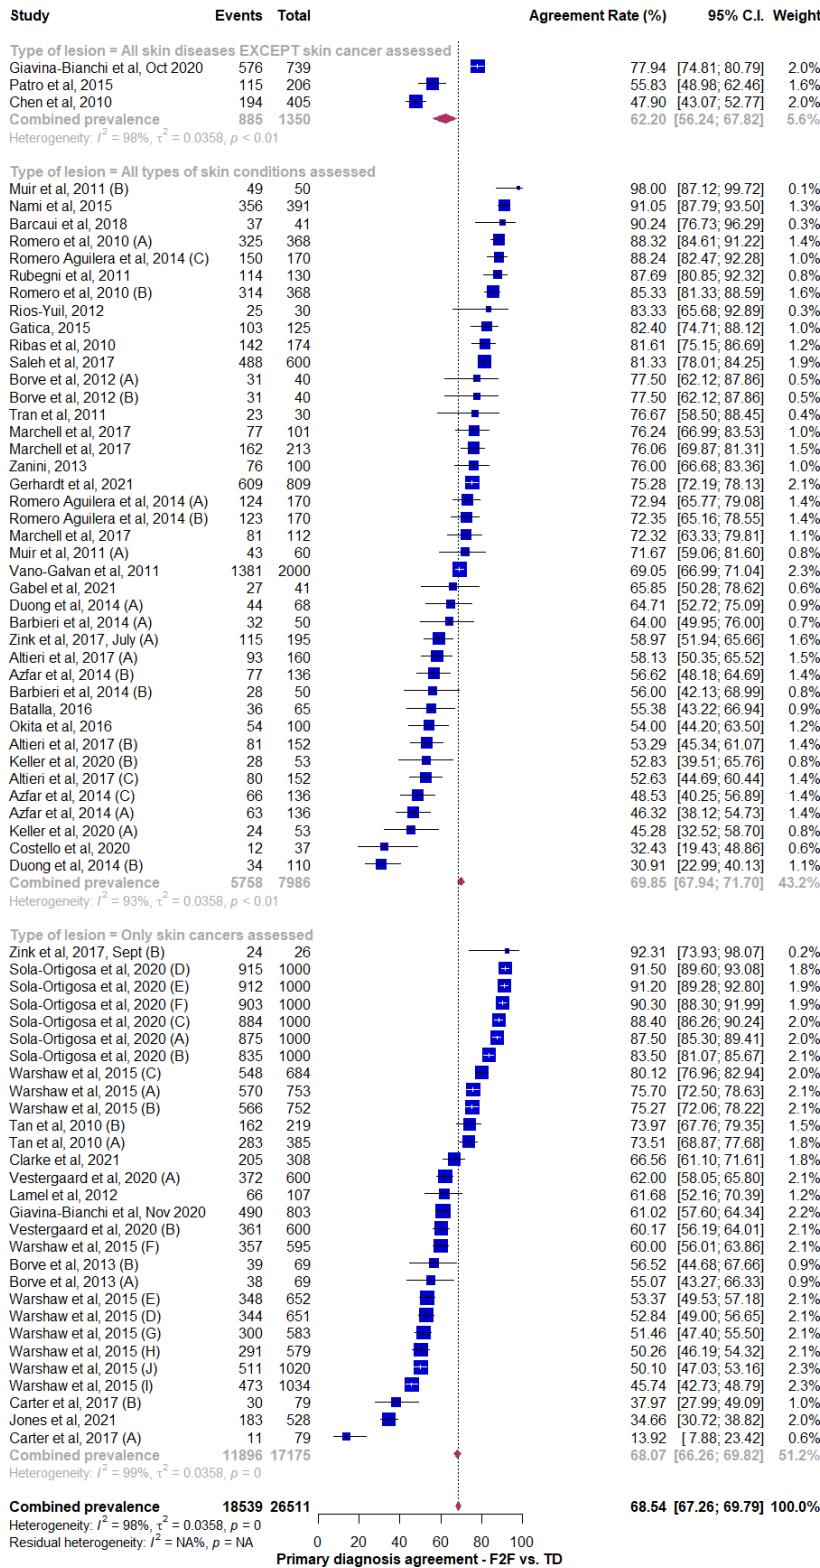

B

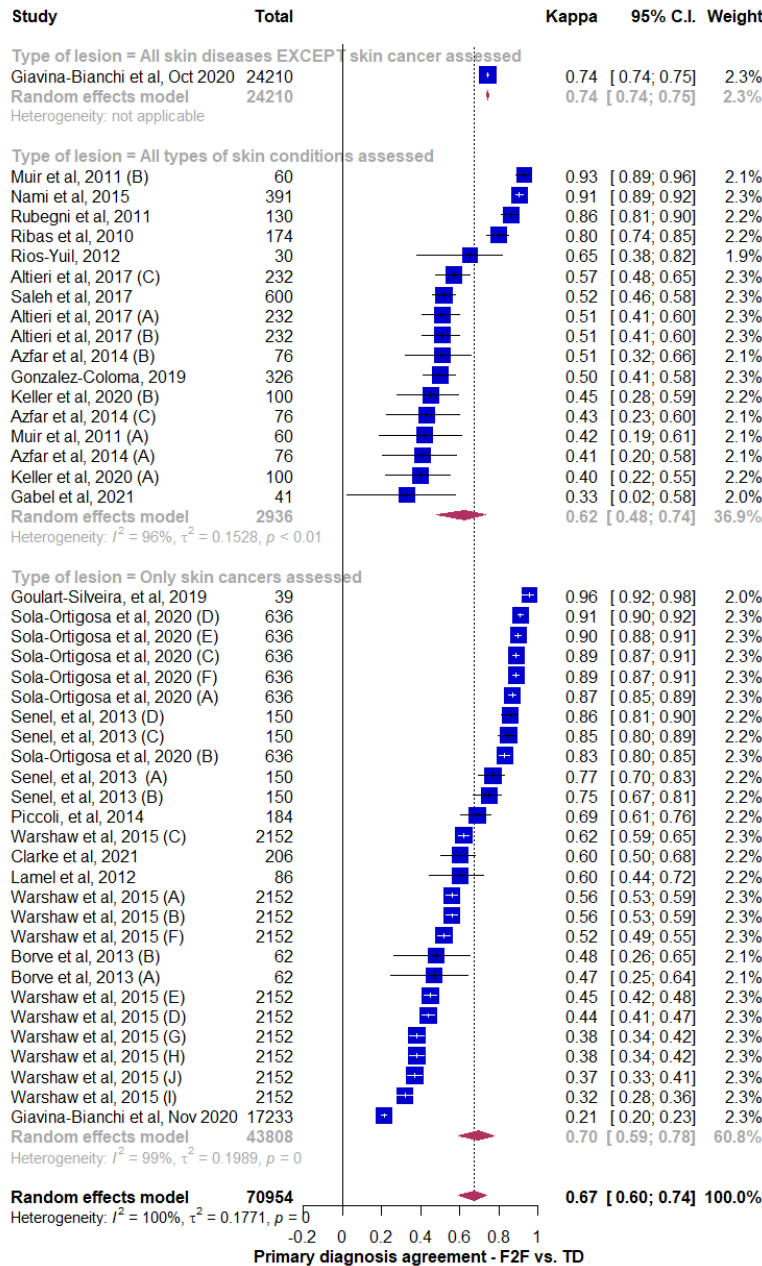

397  
398  
399  
400  
401  
402  
403  
404  
405

**Figure 5. Forest plot representing F2F and teledermatology primary diagnostic agreement by skin lesion category.** Studies were sorted into three groups according to the type of lesions included, i) All skin conditions except likely malignant lesions; ii) All skin conditions; iii) Likely malignant lesions only. (A) Forest plot representing percentage agreement and 95% C.I. for overall concordance across 26 studies with a total of 39 unique number of comparisons, N of events and total included participants. (B) Forest plot representing kappa concordance and 95% C.I. for overall concordance across ten studies with a total of 27 unique number of comparisons, N of total included participants. Abbreviations: F2F (Face-to-Face), PCP (Primary Care Provider), TD (Teledermatology or Teledermatologist).

## Supplementary eTables

| Author, Year                   | Study design                   | Country           | Funding reported | Intervention                                                                                                                                            | *Outcome                                                              | Patients (n) | Female (%) | Mean Age (y) | Lesions (N) |
|--------------------------------|--------------------------------|-------------------|------------------|---------------------------------------------------------------------------------------------------------------------------------------------------------|-----------------------------------------------------------------------|--------------|------------|--------------|-------------|
| <b>TD vs F2F Dermatologist</b> |                                |                   |                  |                                                                                                                                                         |                                                                       |              |            |              |             |
| Altieri, et al, 2017           | Prospective Cohort             | USA               | Y                | TD and F2F dermatologists via clinical images taken by digital photography                                                                              | Diagnostic agreement rate, Concordance                                | 232          | N/A        | NA           | 232         |
| Azfar, et al, 2014             | Prospective Cohort             | USA, Botswana     | N                | TD and F2F dermatologists via smartphone images                                                                                                         | Diagnostic agreement rate, Concordance                                | 76           | 57         | 39           | 159         |
| Barbieri, et al, 2014          | Prospective Cohort             | USA               | N                | TD and F2F dermatologists via smartphone images using the AccessDerm smartphone platform                                                                | Diagnostic agreement rate                                             | 50           | 64         | 55.2         | 50          |
| Barcaui, et al, 2018           | Prospective Cohort             | Brazil            | N                | TD and F2F consult by the same dermatologist via digital photography and dermoscopy images stored in WhatsApp                                           | Diagnostic agreement rate                                             | 31           | 71         | 56.5         | 41          |
| Batalla, 2015                  | Retrospective Cohort           | Spain             | N                | TD and F2F dermatologists by via clinical images                                                                                                        | Diagnostic agreement rate                                             | 183          | 66         | 9            | 65          |
| Borve, et al, 2012             | Prospective Cohort             | Sweden            | Y                | TD and F2F consults by the same dermatologist via smartphone images stored in Tele-Dermis                                                               | Diagnostic agreement rate                                             | 40           | 57.5       | 49           | 40          |
| Gabel, et al, 2021             | Prospective Cohort             | USA               | Y                | TD and F2F dermatologists via clinical images taken by digital photography and tablets                                                                  | Diagnostic agreement rate, Concordance                                | 41           | N/A        | N/A          | 41          |
| Gatica, et al, 2015            | Prospective Cohort             | Chile             | N                | TD and F2F dermatologists via clinical images taken by digital photography                                                                              | Diagnostic agreement rate                                             | 125          | 57.6       | 37.7         | 125         |
| Gerhardt, et al, 2021          | Retrospective Cohort           | USA               | Y                | TD and F2F dermatologists via clinical images                                                                                                           | Diagnostic agreement rate                                             | 809          | N/A        | N/A          | 809         |
| Keller, et al, 2020            | Prospective Cohort             | USA               | Y                | TD and F2F dermatologists or hospitalists on clinical images taken by smartphones and tablets                                                           | Diagnostic agreement rate, Concordance                                | 100          | 43.2       | N/A          | 100         |
| Marchell, et al., 2017         | Quasi RCT                      | USA               | Y                | TD and F2F dermatologists via digital photography, compressed and uncompressed video                                                                    | Diagnostic agreement rate (SFTD, video)                               | 216          | N/A        | N/A          | 216         |
| Muir, et al, 2011              | Prospective Cohort             | Australia         | N                | TD and F2F emergency derms and non-specialists via clinical images taken by digital photography                                                         | Diagnostic agreement rate, Concordance                                | 50           | 65         | 47           | 50          |
| Nami, et al, 2015              | Prospective Cohort             | Italy and Austria | Y                | TD and F2F dermatologists via smartphone images stored in MugDerma                                                                                      | Diagnostic agreement rate, Concordance                                | 391          | 52.2       | 54           | 391         |
| Okita, et al, 2016             | Prospective Cohort             | Brazil            | N                | TD and F2F dermatologists via smartphone images                                                                                                         | Diagnostic agreement rate                                             | 100          | N/A        | N/A          | 100         |
| Ribas, et al, 2010             | Prospective Cohort             | Brazil            | Y                | TD and F2F dermatologists via digital photography                                                                                                       | Diagnostic agreement rate, Concordance                                | 174          | 53.4       | 34.7         | 174         |
| Rios-Yuil, 2011                | RCT                            | Panama            | N                | TD and F2F dermatologists via clinical images taken by digital photography for case conferences                                                         | Diagnostic agreement rate, Concordance                                | 30           | 63.3       | N/A          | 30          |
| Romero Aguilera, et al, 2014   | Prospective Cohort             | Spain             | Y                | TD and F2F dermatologists via clinical images taken by digital photography stored in DERMARED. Some patients were seen by the same derm for F2F and TD. | Diagnostic agreement rate                                             | 457          | 56%        | 36           | 170         |
| Romero, et al, 2010            | RCT                            | Spain             | Y                | TD and F2F consults by the same dermatologist via digital photography and videoconferences via DERMARED software                                        | Diagnostic agreement rate                                             | 328          | 56%        | 36           | 510         |
| Rubegni, et al, 2011           | Prospective Cohort             | Italy             | N                | TD and F2F dermatologists via digital photography and dermoscopy images stored in Dermo-image.                                                          | Diagnostic agreement rate, Concordance                                | 130          | 53.9       | 80.6         | 130         |
| Saleh, et al, 2017             | Prospective Cohort             | Egypt             | Y                | TD and F2F dermatologists via clinical images taken by digital photography stored in Dropbox                                                            | Diagnostic agreement rate, Concordance                                | 600          | 50.7       | N/A          | 600         |
| Tran, et al, 2011              | Prospective Cohort             | Egypt             | Y                | TD and F2F dermatologists via smartphone images stored in ClickDoc                                                                                      | Diagnostic agreement rate                                             | 30           | N/A        | N/A          | 30          |
| Vano-Galvan, et al, 2010       | Retrospective, Cross-sectional | Spain             | N                | TD and F2F dermatologists via clinical images taken by digital photography for case conferences                                                         | Diagnostic agreement rate, 100 patients each analyzed by 20 observers | 100          | N/A        | N/A          | 100         |
| Zanini, 2013                   | Prospective Cohort             | Brazil            | N                | TD and F2F dermatologists via clinical images taken by digital photography                                                                              | Diagnostic agreement rate                                             | 100          | N/A        | N/A          | 100         |
| Zink, et al, 2017, July        | Prospective Cohort             | Germany           | Y                | TD and F2F dermatologists via smartphone images stored in the KLARA app                                                                                 | Diagnostic agreement rate                                             | 195          | 20.5       | N/A          | 195         |

All lesions

| Author, Year                     | Study design                   | Country     | Funding reported | Intervention                                                                                                              | *Outcome                                                           | Patients (n) | Female (%) | Mean Age (y) | Lesions (N) |                   |
|----------------------------------|--------------------------------|-------------|------------------|---------------------------------------------------------------------------------------------------------------------------|--------------------------------------------------------------------|--------------|------------|--------------|-------------|-------------------|
| Borve, et al, 2013               | Prospective Cohort             | Sweden      | Y                | TD and F2F consults by the same dermatologist via smartphone and dermoscopy images stored in iDoc 24 app                  | Diagnostic agreement rate, Concordance                             | 62           | 38.7       | 64           | 69          | Skin cancers only |
| Carter, et al, 2017              | Ambispective Cohort            | USA         | Y                | TD and F2F dermatologists, as well as F2F PCP via clinical images stored using Epic EHR software                          | Diagnostic agreement rate                                          | 79           | 74         | 47           | 79          |                   |
| Clarke, et al, 2021              | Prospective Cohort             | USA         | Y                | TD and F2F dermatologists via clinical images taken by digital photography stored in Research Electronic Data Capture     | Diagnostic agreement rate, Concordance                             | 206          | 49.5       | 56.9         | 308         |                   |
| Giavina-Bianchi, et al, 2020 Nov | Retrospective Cohort           | Brazil      | N                | TD and F2F dermatologists via smartphone images                                                                           | Diagnostic agreement rate, Concordance                             | 17,233       | 71.4       | N/A          | 803         |                   |
| Goulart-Silveira et al, 2019     | Prospective Cohort             | Brazil      | N                | TD and F2F dermatologists via smartphone images acquired and stored via Telederma app                                     | Concordance                                                        | 39           | 69         | 68           | 39          |                   |
| Lamel, et al, 2012               | Prospective Cohort             | USA         | N                | TD and F2F dermatologists via smartphone images stored in ClickDerm                                                       | Diagnostic agreement rate, Concordance                             | 86           | 58.1       | 45.2         | 107         |                   |
| Senel, et al, 2013               | Prospective Cohort             | Turkey      | N                | TD and F2F dermatologists via digital photography and dermoscopy images                                                   | Concordance with and without dermoscopy                            | 150          | 49         | 55           | 150         |                   |
| Sola-Ortigosa, et al, 2020       | Prospective Cohort             | Spain       | N                | TD and F2F consults by the same dermatologist via dermoscopy and clinical images taken by digital photography and tablets | Diagnostic agreement rate, Concordance                             | 636          | 43.2       | 72.8         | 1,000       |                   |
| Tan, et al, 2010                 | Prospective Cohort             | New Zealand | Y                | TD and F2F consults by the same dermatologist via digital photography                                                     | Diagnostic agreement rate                                          | 200          | 63         | N/A          | 491         |                   |
| Vestergaard, et al, 2020         | Prospective Cohort             | Denmark     | N                | TD and F2F dermatologists via smartphone and dermoscopy images using FotoFinder Systems                                   | Diagnostic agreement rate, Concordance                             | 519          | 57         | 55           | 600         |                   |
| Warshaw, et al, 2015             | Prospective, Cross-sectional   | USA         | N                | TD and F2F dermatologists via digital photography and dermoscopy images                                                   | Diagnostic agreement rate, Concordance                             | 2,152        | 3.2        | 68           | 3,021       |                   |
| Zink, et al, 2017, Sept          | Prospective Cohort             | Germany     | Y                | TD and F2F dermatologists via smartphone and dermoscopy images using Handyfotos                                           | Diagnostic agreement rate                                          | 26           | N/A        | N/A          | 26          |                   |
| Giavina-Bianchi, et al, 2020 Oct | Retrospective Cohort           | Brazil      | N                | TD and F2F dermatologists via smartphone images                                                                           | Diagnostic agreement rate, Concordance                             | 24,210       | 70         | N/A          | 739         |                   |
| <b>TD vs F2F Non-specialist</b>  |                                |             |                  |                                                                                                                           |                                                                    |              |            |              |             |                   |
| Costello, et al, 2019            | Prospective, Cross-sectional   | USA         | Y                | TD and F2F PCP via smartphone and dermoscopy images using the Photo Exam app                                              | Diagnostic agreement rate                                          | 37           | 65         | 47.9         | 37          | All skin lesions  |
| Duong, et al, 2014               | Prospective, Observational     | France      | Y                | TD and F2F emergency physicians via smartphone images and videoconferences                                                | Diagnostic agreement rate (SFTD, video)                            | 194          | N/A        | N/A          | 178         |                   |
| Gonzalez-Coloma, et al, 2019     | Prospective, Cross-sectional   | Chile       | N                | TD and F2F PCP via clinical images                                                                                        | Diagnostic concordance                                             | 326          | 59         | 35.8         | 326         |                   |
| Keller, et al, 2020              | Prospective Cohort             | USA         | Y                | TD and F2F dermatologists or hospitalists on clinical images taken by smartphones and tablets                             | Diagnostic agreement rate, Concordance                             | 100          | 43.2       | N/A          | 100         |                   |
| Muir, et al, 2011                | Prospective Cohort             | Australia   | N                | TD and F2F emergency physicians via clinical images taken by digital photography                                          | Diagnostic agreement rate, Concordance                             | 60           | 65         | 47           | 60          |                   |
| Carter, et al, 2017              | Ambispective Cohort            | USA         | Y                | TD and F2F dermatologists, as well as F2F PCP via clinical images stored using Epic EHR software                          | Diagnostic agreement rate                                          | 79           | 74         | 47           | 79          | Skin cancers only |
| Jones, et al, 2021               | Retrospective Cohort           | New Zealand | Y                | TD and F2F PCP via digital photography and dermoscopy images                                                              | SSC matched for age, sex, and ethnicity. Diagnostic agreement rate | 481          | 64         | N/A          | 528         |                   |
| Piccoli, et al, 2015             | Retrospective, Cross-sectional | Brazil      | Y                | TD and F2F PCP via digital photography and dermoscopy images                                                              | Diagnostic concordance                                             | 184          | 73.4       | 54.7         | 184         |                   |
| Chen, et al, 2010                | Retrospective Cohort           | USA         | Y                | TD and F2F PCP via clinical images stored in Second Opinion Software                                                      | Diagnostic agreement rate                                          | 405          | 50.6       | 5.9          | 405         | B.                |
| Patro, et al 2015                | Prospective Cohort             | India       | Y                | TD and F2F PCP via digital photography                                                                                    | Diagnostic agreement rate                                          | 206          | 58.7       | N/A          | 206         |                   |

**eTable 1. Study and patient characteristics for all included studies.** The table is divided into two sections: one comparing teledermatology with Face-to-Face (F2F) dermatologists, and another comparing teledermatologists with F2F non-specialists. The studies are listed alphabetically and grouped by lesion type. \*See supplementary eTable 4 for agreement rates and concordance values. Abbreviations used in the table include B (Benign lesions only), ED (Emergency Department), EHR (Electronic Health Record), F2F (Face-to-Face), Histo

(Histopathology), ICD10 (International Classification of Diseases, 10th Edition), N (No), N/A (Not available), PCP (Primary Care Provider), PLD (Polarized Light Dermoscopy), RCT (Randomized Controlled Trial), SFTD (Store-and-Forward Teledermatology), SSC (Specialized Skin Clinic), TD (Teledermatology or Teledermatologist), and Y (Yes). Patient characteristics for all 44 included studies are also provided, grouped by lesion type, with a column describing special inclusion and exclusion criteria.

406

| Inclusion criteria                                                                                                                                                                   | Exclusion criteria                                                                                                                                                                                                                                   |
|--------------------------------------------------------------------------------------------------------------------------------------------------------------------------------------|------------------------------------------------------------------------------------------------------------------------------------------------------------------------------------------------------------------------------------------------------|
| Primary articles assessing diagnostic agreement where store-and-forward technology or live video conference consults were compared with a control group who attend in-person visits. | Survey articles, feasibility studies, studies regarding other forms of telemedicine unrelated to dermatology, cost-effectiveness studies, editorials, and review articles.                                                                           |
| Primarily comparing teledermatology to F2F, sometimes using histopathology as the reference standard.                                                                                | Studies that clearly stated they used teledermatologists as the gold- or reference standard.<br><br>Studies that only compared dermatoscopic images in the absence of clinical images.<br><br>Studies where patients captured their own photographs. |

407  
408  
409  
410  
411**eTable 2. Inclusion and exclusion criteria for screening of literature search results.**

F2F: Face-to-Face.

**Study characteristics**

Author, year, title, study type, objective, country of publication. Patient characteristics: total number of participants included declaration of funding source, number of participants per study, mean age +/- SD, age range, gender, mean BMI and range, race/ethnicity, type of lesions evaluated, type of patients evaluated.

**Methodology - teledermatology and F2F consults**

Method of correspondence, platform used for the teledermatology consult, training on teledermatology platform, length of teledermatology and F2F consult, experience of the teledermatologist and F2F physician, location of the teledermatologist, number of teledermatologists and F2F physicians who made a diagnosis for each patient, total number of teledermatologists and F2F physicians in study, order of visits, wait time between teledermatology and F2F consult, whether same specialist conducted teledermatology and F2F visit, specialization of the F2F physician, number of reviews; qualifications of the individual who acquired the clinical photographs and whether they received additional training on taking clinical photographs.

**Metrics and results**

Technology used for image acquisition and for viewing images with, distance between camera and lesion, number of images taken, use of teledermoscopy & dermoscopy, brand of dermatoscope, use of histopathology, referral content provided to teledermatologist, primary and differential diagnoses agreement and concordance rates, diagnostic accuracy values (if available) such as sensitivity, specificity, PPV and NPV.

412  
413**eTable 3. Data extraction form with details of domains record.**

F2F: Face-to-Face, PPV: Positive Predictive Value, NPV: Negative Predictive Value.

| Author and Year          | Unique Study Grouping | Participants (n) | Lesions (N) | Primary Diagnosis Agreement F2F vs F2F (%) | Diagnosis Agreement (N) / Total Diagnoses (N) | Primary Diagnosis Agreement TD vs TD (%) | Diagnosis Agreement (N) / Total Diagnoses (N) | Primary Diagnosis Agreement TD vs F2F (%) | Diagnosis Agreement (N) / Total Diagnoses (N) | Primary Diagnosis Agreement TD vs Histo (%) | Diagnosis Agreement (N) / Total Diagnoses (N) | Primary Diagnosis Kappa Value TD vs F2F | Primary Diagnosis Kappa Value TD vs Histo |
|--------------------------|-----------------------|------------------|-------------|--------------------------------------------|-----------------------------------------------|------------------------------------------|-----------------------------------------------|-------------------------------------------|-----------------------------------------------|---------------------------------------------|-----------------------------------------------|-----------------------------------------|-------------------------------------------|
| Altieri et al, 2017 (A)  | F2F Derm vs TD1       | 232              | 232         |                                            |                                               |                                          |                                               | 58                                        | 93/160                                        |                                             |                                               | 0.51                                    |                                           |
| Altieri et al, 2017 (B)  | F2F Derm vs TD2       | 232              | 232         |                                            |                                               |                                          |                                               | 53                                        | 81/152                                        |                                             |                                               | 0.51                                    |                                           |
| Altieri et al, 2017 (C)  | F2F Derm vs TD3       | 232              | 232         |                                            |                                               |                                          |                                               | 53                                        | 80/152                                        |                                             |                                               | 0.57                                    |                                           |
| Azfar et al, 2014 (A)    | F2F Derm vs TD1       | 76               | 159         |                                            |                                               |                                          |                                               | 47                                        | 63/136                                        |                                             |                                               | 0.41                                    |                                           |
| Azfar et al, 2014 (B)    | F2F Derm vs TD2       | 76               | 159         |                                            |                                               |                                          |                                               | 57                                        | 77/136                                        |                                             |                                               | 0.51                                    |                                           |
| Azfar et al, 2014 (C)    | F2F Derm vs TD3       | 76               | 159         |                                            |                                               |                                          |                                               | 49                                        | 66/136                                        |                                             |                                               | 0.43                                    |                                           |
| Barbieri et al, 2014 (A) | F2F Derm vs TD1       | 50               | 50          |                                            |                                               | 58                                       | 29/50                                         | 64                                        | 32/50                                         |                                             |                                               |                                         |                                           |
| Barbieri et al, 2014 (B) | F2F Derm vs TD2       | 50               | 50          |                                            |                                               |                                          |                                               | 56                                        | 28/50                                         |                                             |                                               |                                         |                                           |
| Barcaui et al, 2018      | F2F Derm vs TD        | 31               | 41          |                                            |                                               |                                          |                                               | 90                                        | 37/41                                         |                                             |                                               |                                         |                                           |
| Batalla, 2016            | F2F Derm vs TD        | 183              | 183         |                                            |                                               |                                          |                                               | 55                                        | 36/65                                         |                                             |                                               |                                         |                                           |
| Borve et al, 2012 (A)    | F2F Derm vs TD1       | 40               | 40          | 88                                         | 35/40                                         | 68                                       | 27/40                                         | 78                                        | 31/40                                         |                                             |                                               |                                         |                                           |
| Borve et al, 2012 (B)    | F2F Derm vs TD2       | 40               | 40          |                                            |                                               |                                          |                                               | 78                                        | 31/40                                         |                                             |                                               |                                         |                                           |

|                                 |                                                          |       |       |    |       |    |         |      |         |
|---------------------------------|----------------------------------------------------------|-------|-------|----|-------|----|---------|------|---------|
| Borve et al, 2013 (A)           | F2F Derm vs TD1                                          | 62    | 69    | 58 | 40/69 | 55 | 38/69   | 0.47 | 0.51    |
| Borve et al, 2013 (B)           | F2F Derm vs TD2                                          | 62    | 69    |    |       | 57 | 39/69   | 0.48 |         |
| Carter et al, 2017 (A)          | F2F nonspecialist vs TD                                  | 79    | 79    | 38 | 30/79 | 14 | 11/79   |      |         |
| Carter et al, 2017 (B)          | F2F Derm vs TD                                           | 79    | 79    |    |       | 38 | 30/79   |      |         |
| Chen et al, 2010                | F2F nonspecialist vs TD                                  | 405   | 405   |    |       | 48 | 194/405 |      |         |
| Clarke et al, 2021              | F2F Derm vs TD                                           | 206   | 308   |    |       | 67 | 205/308 | 65   | 40/62   |
| Costello et al, 2020            | F2F nonspecialist vs TD                                  | 37    | 37    |    |       | 32 | 12/37   |      |         |
| Duong et al, 2014 (A)           | F2F nonspecialist vs TD (Videoconference)                | 111   | 110   |    |       | 65 | 44/68   |      |         |
| Duong et al, 2014 (B)           | F2F nonspecialist vs TD (SFTD)                           | 111   | 110   |    |       | 31 | 34/110  |      |         |
| Gabel et al, 2021               | F2F Derm vs TD                                           | 41    | 41    |    |       | 67 | 27/41   |      | 0.33    |
| Gatica, 2015                    | F2F Derm vs TD                                           | 125   | 125   |    |       | 82 | 103/125 |      |         |
| Gerhardt et al, 2021            | F2F Derm vs TD                                           | 809   | 809   |    |       | 75 | 609/809 |      |         |
| Giavina-Bianchi et al, Nov 2020 | F2F Derm vs TD                                           | 17233 | 17233 |    |       | 61 | 490/803 | 54   | 156/289 |
| Giavina-Bianchi et al, Oct 2020 | F2F Derm vs TD                                           | 24210 | 27519 |    |       | 78 | 576/739 |      | 0.74    |
| Gonzalez-Coloma, 2019           | F2F nonspecialist vs TD                                  | 326   | 326   |    |       |    |         |      | 0.5     |
| Goulart-Silveira, et al, 2019   | F2F Derm vs TD                                           | 39    | 39    |    |       |    |         |      | 0.96    |
| Jones et al, 2021               | F2F nonspecialist vs TD (Suspicious Skin Cancer pathway) | NA    | 528   |    |       | 35 | 183/528 | 53   | 60/114  |
| Keller et al, 2020 (A)          | F2F nonspecialist vs TD                                  | 100   | 100   |    |       | 45 | 24/53   |      | 0.4     |
| Keller et al, 2020 (B)          | F2F Derm vs TD                                           | 100   | 100   |    |       | 53 | 28/53   |      | 0.45    |
| Lamel et al, 2012               | F2F Derm vs TD                                           | 86    | 107   |    |       | 62 | 66/107  |      | 0.6     |



|                                 |                                             |     |     |    |        |    |    |         |    |         |
|---------------------------------|---------------------------------------------|-----|-----|----|--------|----|----|---------|----|---------|
| Marchell et al, 2017            | F2F Derm vs TD (SFTD)                       | 216 | 216 | 91 | 122/34 |    | 76 | 162/213 |    |         |
| Marchell et al, 2017            | F2F Derm vs TD (Uncompressed video)         | 216 | 216 |    |        |    | 76 | 77/101  |    |         |
| Marchell et al, 2017            | F2F Derm vs TD (Compressed video)           | 216 | 216 |    |        |    | 72 | 81/112  |    |         |
| Muir et al, 2011 (A)            | F2F nonspecialist vs TD                     | 60  | 60  |    |        |    | 72 | 43/60   |    | 0.42    |
| Muir et al, 2011 (B)            | F2F Derm vs TD                              | 60  | 60  |    |        |    | 98 | 49/50   |    | 0.93    |
| Nami et al, 2015                | F2F Derm vs TD                              | 391 | 391 |    |        |    | 91 | 356/391 |    | 0.91    |
| Okita et al, 2016               | F2F Derm vs TD                              | 100 | 100 |    |        |    | 54 | 54/100  |    |         |
| Patro et al, 2015               | F2F nonspecialist vs TD                     | 206 | 206 |    |        |    | 56 | 115/206 |    |         |
| Piccoli, et al, 2014            | F2F nonspecialist vs TD                     | 184 | 184 |    |        |    |    |         |    | 0.69    |
| Ribas et al, 2010               | F2F Derm vs TD                              | 174 | 174 | 83 | 145/74 | 81 | 4  | 141/17  |    |         |
| Rios-Yuil, 2012                 | F2F Derm vs TD                              | 30  | 30  |    |        |    | 82 | 142/174 |    | 0.8     |
| Romero Aguilera et al, 2014 (A) | F2F Derm vs TD1                             | 457 | 192 |    |        | 69 | 0  | 118/17  | 73 | 124/170 |
| Romero Aguilera et al, 2014 (B) | F2F Derm vs TD2                             | 457 | 192 |    |        | 73 | 0  | 124/17  | 72 | 123/170 |
| Romero Aguilera et al, 2014 (C) | F2F Derm vs TD3                             | 457 | 192 |    |        | 67 | 0  | 114/17  | 88 | 150/170 |
| Romero et al, 2010 (A)          | F2F Derm vs TD (SFTD)                       | 457 | 192 |    |        |    |    |         | 88 | 325/368 |
| Romero et al, 2010 (B)          | F2F Derm vs TD (SFTD and videoconferencing) | 457 | 176 |    |        |    |    |         | 85 | 314/368 |
| Rubegni et al, 2011             | F2F Derm vs TD                              | 130 | 130 |    |        |    |    |         | 88 | 114/130 |
| Saleh et al, 2017               | F2F Derm vs TD                              | 600 | 600 |    |        | 88 | 0  | 526/60  | 81 | 488/600 |
| Senel, et al, 2013              | F2F Derm vs TD1 (no dermoscopy)             | 150 | 150 |    |        |    |    |         |    | 0.77    |
| Senel, et al, 2013              | F2F Derm vs TD2 (no dermoscopy)             | 150 | 150 |    |        |    |    |         |    | 0.75    |

|                               |                                                            |      |      |    |         |    |          |    |           |      |
|-------------------------------|------------------------------------------------------------|------|------|----|---------|----|----------|----|-----------|------|
| Senel, et al, 2013            | F2F Derm vs TD1 (dermoscopy)                               | 150  | 150  |    |         |    |          |    |           | 0.85 |
| Senel, et al, 2013            | F2F Derm vs TD2 (dermoscopy)                               | 150  | 150  |    |         |    |          |    |           | 0.86 |
| Sola-Ortigosa et al, 2020 (A) | F2F Derm vs TD1 (no dermoscopy)                            | 636  | 1000 |    |         | 82 | 821/1000 | 88 | 875/1000  | 0.87 |
| Sola-Ortigosa et al, 2020 (B) | F2F Derm vs TD2 (no dermoscopy)                            | 636  | 1000 |    |         | 83 | 832/1000 | 84 | 835/1000  | 0.83 |
| Sola-Ortigosa et al, 2020 (C) | F2F Derm vs TD3 (no dermoscopy)                            | 636  | 1000 |    |         | 81 | 813/1000 | 88 | 884/1000  | 0.89 |
| Sola-Ortigosa et al, 2020 (D) | F2F Derm vs TD1 (dermoscopy)                               | 636  | 1000 |    |         | 92 | 915/1000 | 92 | 915/1000  | 0.91 |
| Sola-Ortigosa et al, 2020 (E) | F2F Derm vs TD2 (dermoscopy)                               | 636  | 1000 |    |         | 90 | 902/1000 | 91 | 912/1000  | 0.9  |
| Sola-Ortigosa et al, 2020 (F) | F2F Derm vs TD3 (dermoscopy)                               | 636  | 1000 |    |         | 90 | 899/1000 | 90 | 903/1000  | 0.89 |
| Tan et al, 2010 (A)           | F2F Derm vs TD1, F2F Derm 1 vs F2F Derm 2                  | 200  | 491  | 82 | 157/191 | 72 | 355/491  | 74 | 283/385   |      |
| Tan et al, 2010 (B)           | F2F Derm vs TD2, F2F Derm 2 vs F2F Derm 3                  | 200  | 491  | 76 | 80/106  |    |          | 74 | 162/219   |      |
| Tan et al, 2010 (C)           | F2F Derm 1 vs F2F Derm 3                                   | 200  | 491  | 76 | 147/194 |    |          |    |           |      |
| Tran et al, 2011              | F2F Derm vs TD                                             | 30   | 30   |    |         |    |          | 75 | 23/30     |      |
| Vano-Galvan et al, 2011       | F2F Derm vs TD                                             | 100  | 100  |    |         |    |          | 69 | 1381/2000 |      |
| Vestergaard et al, 2020 (A)   | A F2F Derm vs TD1                                          | 519  | 600  |    |         | 62 | 370/600  | 62 | 372/600   | 58   |
| Vestergaard et al, 2020 (B)   | F2F Derm vs TD2                                            | 519  | 600  |    |         |    |          | 60 | 361/600   | 54   |
| Warshaw et al, 2015 (A)       | F2F Derm vs TD (non biopsied pigmented lesions, Macro)     | 2152 | 3021 |    |         |    |          | 76 | 570/753   | 0.56 |
| Warshaw et al, 2015 (B)       | F2F Derm vs TD (non biopsied pigmented lesions, Macro+PLD) | 2152 | 3021 |    |         |    |          | 75 | 566/752   | 0.56 |
| Warshaw et al, 2015 (C)       | F2F Derm vs TD (non biopsied pigmented lesions, Macro+PLD) | 2152 | 3021 |    |         |    |          | 80 | 548/684   | 0.62 |

|                            |                                                              |      |      |    |              |                   |
|----------------------------|--------------------------------------------------------------|------|------|----|--------------|-------------------|
| Warshaw et al, 2015 (D)    | F2F Derm vs TD (biopsied pigmented lesions, Macro)           | 2152 | 3021 | 53 | 344/651      | 0.44              |
| Warshaw et al, 2015 (E)    | F2F Derm vs TD (biopsied pigmented lesions, Macro+PLD)       | 2152 | 3021 | 53 | 348/652      | 0.45              |
| Warshaw et al, 2015 (F)    | F2F Derm vs TD (biopsied pigmented lesions, Macro+PLD)       | 2152 | 3021 | 60 | 357/595      | 0.52              |
| Warshaw et al, 2015 (G)    | F2F Derm vs TD (NONbiopsied NONpigmented lesions, Macro)     | 2152 | 3021 | 52 | 300/583      | 0.38              |
| Warshaw et al, 2015 (H)    | F2F Derm vs TD (NONbiopsied NONpigmented lesions, Macro+PLD) | 2152 | 3021 | 50 | 291/579      | 0.38              |
| Warshaw et al, 2015 (I)    | F2F Derm vs TD (biopsied NONpigmented lesions, Macro)        | 2152 | 3021 | 46 | 473/103<br>4 | 0.32              |
| Warshaw et al, 2015 (J)    | F2F Derm vs TD (biopsied NONpigmented lesions, Macro+PLD)    | 2152 | 3021 | 50 | 511/102<br>0 | 0.37              |
| Zanini, 2013               | F2F Derm vs TD                                               | 100  | 100  | 76 | 76/100       |                   |
| Zink et al, 2017, July (A) | F2F Derm vs TD                                               | 195  | 195  | 59 | 115/195      | 56<br>108/1<br>95 |
| Zink et al, 2017, Sept (B) | F2F Derm vs TD                                               | 26   | 26   | 92 | 24/26        | 67<br>17/26       |

**eTable 4. Included unique study groupings and letter codes for individual agreement rates and kappa concordance values.** The abbreviations used in the text are as follows: TD (Teledermatology or Teledermatologist), Derm (Dermatologist), F2F (Face-to-Face), SFTD (Store and Forward Technology), PLD (Polarized Light Dermoscopy), and Macro (Macroscopic clinical images).

| Study ID                  | Journal                                                                                           | Reason For Exclusion |
|---------------------------|---------------------------------------------------------------------------------------------------|----------------------|
| NCT03034694, 2016         | <a href="https://clinicaltrials.gov">ClinicalTrials.gov</a>                                       | Wrong study design   |
| Andersson et al, 2017     | Lakartidningen                                                                                    | Wrong study design   |
| Romero et al, 2018        | Actas dermo-sifiliograficas                                                                       | Wrong study design   |
| Orruno et al, 2016        | Health Technology Assessment Database                                                             | Wrong study design   |
| Batalla et al, 2016       | Piel                                                                                              | Wrong study design   |
| Kroemer et al, 2011       | British Journal of Dermatology                                                                    | Wrong study design   |
| Ernstberger et al, 2014   | Zentralblatt fur Chirurgie                                                                        | Wrong study design   |
| Totty et al, 2018         | Journal of wound care                                                                             | Wrong study design   |
| Wurm et al, 2013          | Journal of Telemedicine and Telecare                                                              | Wrong study design   |
| Wang et al, 2017          | Telemedicine journal and e-health : the official journal of the American Telemedicine Association | Wrong study design   |
| Singh et al, 2011         | Australasian Journal of Dermatology                                                               | Wrong study design   |
| Grey et al, 2017          | Dermatitis                                                                                        | Wrong study design   |
| Crompton et al, 2010      | Journal of Visual Communication in Medicine                                                       | Wrong study design   |
| Ali et al, 2021           | JMIR formative research                                                                           | Wrong study design   |
| Boyce et al, 2011         | Dermatology                                                                                       | Wrong study design   |
| Berg et al, 2017          | Sarcoidosis Vasculitis and Diffuse Lung Diseases                                                  | Wrong study design   |
| Shin et al, 2014          | Journal of telemedicine and telecare                                                              | Wrong study design   |
| Gacto-Sanchez et al, 2020 | Burns : journal of the International Society for Burn Injuries                                    | Wrong study design   |
| Tian et al, 2017          | Journal of Cosmetic Dermatology                                                                   | Wrong study design   |
| Thind et al, 2011         | Clinical and Experimental Dermatology                                                             | Wrong study design   |
| Silveira et al, 2014      | BMC Dermatology                                                                                   | Wrong study design   |
| O'Connor et al, 2017      | JAMA Dermatology                                                                                  | Wrong study design   |
| Janda et al, 2020         | The Lancet. Digital health                                                                        | Wrong study design   |
| Day et al, 2020           | Military medicine                                                                                 | Wrong study design   |
| Karlsson et al, 2015      | Acta Dermato-Venereologica                                                                        | Wrong study design   |
| Seghers et al, 2015       | Australasian Journal of Dermatology                                                               | Wrong study design   |
| Hazenberg et al, 2010     | Journal of Medical Engineering and Technology                                                     | Wrong study design   |
| Borve et al, 2015         | Acta Dermato-Venereologica                                                                        | Wrong study design   |
| Boissin et al, 2015       | Burns                                                                                             | Wrong study design   |
| Da Silva et al, 2018      | Dermatology online journal                                                                        | Wrong study design   |
| Devrim et al, 2019        | BMC pediatrics                                                                                    | Wrong study design   |
| Danielsson et al, 2016    | Health Technology Assessment Database                                                             | Wrong study design   |
| Berglund et al, 2020      | Journal of the European Academy of Dermatology and Venereology : JEADV                            | Wrong study design   |
| Forsblom et al, 2013      | Clinical Infectious Diseases                                                                      | Wrong study design   |
| G Bianchi et al, 2020     | Journal of medical Internet research                                                              | Wrong study design   |
| Congalton et al, 2015     | Journal of the European Academy of Dermatology and Venereology                                    | Wrong study design   |
| Ferrandiz et al, 2012     | Archives of Dermatology                                                                           | Wrong study design   |
| Ismail et al, 2018        | International Journal of Women's Dermatology                                                      | Wrong study design   |
| Gamus et al, 2019         | International journal of medical informatics                                                      | Wrong study design   |
| Paudel et al, 2020        | Case reports in dermatological medicine                                                           | Wrong study design   |
| Georgesesen et al, 2020   | Telemedicine journal and e-health : the official journal of the American Telemedicine Association | Wrong study design   |
| Gagnon et al, 2015        | Dermatology Times                                                                                 | Wrong study design   |
| Philp et al, 2013         | Pediatric Dermatology                                                                             | Wrong study design   |
| Mooney et al, 2011        | Skin Research and Technology                                                                      | Wrong study design   |
| Do Khac et al, 2021       | JMIR mHealth and uHealth                                                                          | Wrong study design   |
| Chambers et al, 2012      | Journal of the American Academy of Dermatology                                                    | Wrong study design   |
| Garcia-Romero et al, 2011 | Telemedicine journal and e-health : the official journal of the American Telemedicine Association | Wrong study design   |
| Ahmed et al, 2020         | Annals of internal medicine                                                                       | Wrong study design   |
| Marwaha et al, 2019       | Journal of the American Academy of Dermatology                                                    | Wrong study design   |
| NCT02122432, 2014         | <a href="https://clinicaltrials.gov">ClinicalTrials.gov</a>                                       | Wrong study design   |
| Lowe et al, 2021          | Clinical and experimental dermatology                                                             | Wrong study design   |

|                               |                                                                                                                            |                                         |
|-------------------------------|----------------------------------------------------------------------------------------------------------------------------|-----------------------------------------|
| Bowling et al, 2011           | Wound Repair and Regeneration                                                                                              | Wrong study design                      |
| Marin-Gomez et al, 2020       | Journal of primary care & community health                                                                                 | Wrong study design                      |
| Veronese et al, 2021          | Diagnostics (Basel, Switzerland)                                                                                           | Wrong study design                      |
| Ismail et al, 2018            | International journal of dermatology                                                                                       | Wrong study design                      |
| NCT02905851, 2016             | <a href="https://clinicaltrials.gov">ClinicalTrials.gov</a>                                                                | Wrong study design                      |
| Trinidad et al, 2020          | Journal of the American Academy of Dermatology                                                                             | Wrong study design                      |
| Tensen et al, 2019            | Studies in health technology and informatics                                                                               | Wrong study design                      |
| Karavan et al, 2014           | Journal of telemedicine and telecare                                                                                       | Wrong study design                      |
| Viola et al, 2011             | Archives of Dermatology                                                                                                    | Wrong study design                      |
| van Netten et al, 2017        | Scientific reports                                                                                                         | Wrong study design                      |
| Cai et al, 2016               | Burns : journal of the International Society for Burn Injuries                                                             | Wrong study design                      |
| Hazenberg et al, 2010         | Diabetes Technology and Therapeutics                                                                                       | Wrong study design                      |
| Jacoby et al, 2021            | Journal of drugs in dermatology : JDD                                                                                      | Wrong study design                      |
| Pak et al, 2018               | Wound repair and regeneration : official publication of the Wound Healing Society [and] the European Tissue Repair Society | Wrong study design                      |
| Kummerow Broman et al, 2019   | JAMA surgery                                                                                                               | Wrong study design                      |
| Munoz-Lopez et al, 2021       | Journal of the European Academy of Dermatology and Venereology : JEADV                                                     | Wrong study design                      |
| Markun et al, 2017            | Medicine                                                                                                                   | Wrong study design                      |
| Piette et al, 2017            | Journal of telemedicine and telecare                                                                                       | Wrong study design                      |
| Tan et al, 2010               | British Journal of Dermatology                                                                                             | Wrong study design                      |
| Watson et al, 2010            | Archives of Dermatology                                                                                                    | Wrong study design                      |
| Wiseman et al, 2016           | Journal of vascular surgery. Venous and lymphatic disorders                                                                | Wrong study design                      |
| Wolf et al, 2013              | JAMA dermatology                                                                                                           | Wrong study design                      |
| Laggis et al, 2020            | The American Journal of dermatopathology                                                                                   | Wrong study design                      |
| Kazi et al, 2021              | Telemedicine journal and e-health : the official journal of the American Telemedicine Association                          | Wrong study design                      |
| Kanthraj et al, 2013          | Indian Journal of Dermatology, Venereology and Leprology                                                                   | Wrong study design                      |
| Shah et al, 2016              | Journal of the American Academy of Dermatology                                                                             | Wrong study design                      |
| Kim et al, 2018               | Skin research and technology                                                                                               | Wrong study design                      |
| Nguyen et al, 2017            | Journal of Clinical and Aesthetic Dermatology                                                                              | Wrong study design                      |
| Rizvi et al, 2020             | PloS one                                                                                                                   | Wrong study design                      |
| Mehrtens et al, 2019          | Clinical and experimental dermatology                                                                                      | Wrong study design                      |
| Knudsen et al, 2012           | Lakartidningen                                                                                                             | Research letter or letter to the editor |
| Korman et al, 2020            | Journal of the American Academy of Dermatology                                                                             | Research letter or letter to the editor |
| Mercer et al, 2014            | Journal of Cutaneous Medicine and Surgery                                                                                  | Research letter or letter to the editor |
| Grunig et al, 2015            | JAMA Dermatology                                                                                                           | Research letter or letter to the editor |
| Cartron et al, 2020           | Dermatologic therapy                                                                                                       | Research letter or letter to the editor |
| McAfee et al, 2020            | Journal of the American Academy of Dermatology                                                                             | Research letter or letter to the editor |
| Wong et al, 2021              | JAMA dermatology                                                                                                           | Research letter or letter to the editor |
| Baranowski et al, 2020        | Journal of the American Academy of Dermatology                                                                             | Research letter or letter to the editor |
| Micheletti et al, 2014        | Journal of the American Academy of Dermatology                                                                             | Research letter or letter to the editor |
| Osei-Tutu et al, 2013         | Journal of the American Academy of Dermatology                                                                             | Research letter or letter to the editor |
| Nair et al, 2015              | International Journal of Dermatology                                                                                       | Research letter or letter to the editor |
| Miller et al, 2021            | Journal of the American Academy of Dermatology                                                                             | Research letter or letter to the editor |
| Keleshian et al, 2017         | Journal of the American Academy of Dermatology                                                                             | Research letter or letter to the editor |
| HAYES; Inc et al, 2016        | Health Technology Assessment Database                                                                                      | Research letter or letter to the editor |
| Jacob et al, 2017             | Journal of telemedicine and telecare                                                                                       | Research letter or letter to the editor |
| Perkins et al, 2020           | Journal of the American Academy of Dermatology                                                                             | Research letter or letter to the editor |
| Halpern et al, 2010           | British Journal of Dermatology                                                                                             | Research letter or letter to the editor |
| Newman et al, 2020            | Journal of the American Academy of Dermatology                                                                             | Research letter or letter to the editor |
| Hunt et al, 2020              | Clinical and experimental dermatology                                                                                      | Research letter or letter to the editor |
| 2018                          | Nursing                                                                                                                    | Research letter or letter to the editor |
| Taneja et al, 2021            | Indian journal of dermatology, venereology and leprology                                                                   | Research letter or letter to the editor |
| Echeverria-Garcia et al, 2019 | Actas dermo-sifiliograficas                                                                                                | Research letter or letter to the editor |
| Henning et al, 2010           | Archives of Dermatology                                                                                                    | Research letter or letter to the editor |

|                             |                                                                        |                                         |
|-----------------------------|------------------------------------------------------------------------|-----------------------------------------|
| Demo et al, 2019            | Clinical and experimental dermatology                                  | Research letter or letter to the editor |
| Byamba et al, 2015          | British Journal of Dermatology                                         | Research letter or letter to the editor |
| Gupta et al, 2020           | Journal of the American Academy of Dermatology                         | Research letter or letter to the editor |
| De Giorgi et al, 2017       | Journal of the European Academy of Dermatology and Venereology         | Research letter or letter to the editor |
| Duong et al, 2016           | Annales de Dermatologie et de Venereologie                             | Research letter or letter to the editor |
| Mortimer et al, 2021        | Journal of the American Academy of Dermatology                         | Research letter or letter to the editor |
| Gravely et al, 2010         | Journal of the American Academy of Dermatology                         | Research letter or letter to the editor |
| Choi et al, 2021            | International journal of dermatology                                   | Research letter or letter to the editor |
| Motley et al, 2012          | BMJ: British Medical Journal (Clinical Research Edition)               | Research letter or letter to the editor |
| Leavitt et al, 2016         | Journal of the American Academy of Dermatology                         | Research letter or letter to the editor |
| Cheng et al, 2020           | Dermatitis : contact, atopic, occupational, drug                       | Research letter or letter to the editor |
| Clark et al, 2021           | Journal of the American Academy of Dermatology                         | Research letter or letter to the editor |
| Fuesl et al, 2010           | MMW-Fortschritte der Medizin                                           | Research letter or letter to the editor |
| English III et al, 2013     | Journal of the American Academy of Dermatology                         | Research letter or letter to the editor |
| Cotes et al, 2021           | Journal of the American Academy of Dermatology                         | Research letter or letter to the editor |
| Abi Rafeh et al, 2021       | Journal of cutaneous medicine and surgery                              | Research letter or letter to the editor |
| Okeke et al, 2020           | The Journal of dermatological treatment                                | Research letter or letter to the editor |
| Splete et al, 2014          | Emergency Medicine (00136654)                                          | Research letter or letter to the editor |
| Khosravi et al, 2021        | Clinical and experimental dermatology                                  | Research letter or letter to the editor |
| Sivesind et al, 2021        | Journal of the American Academy of Dermatology                         | Research letter or letter to the editor |
| Stoecker et al, 2013        | JAMA dermatology                                                       | Research letter or letter to the editor |
| Skayem et al, 2020          | Journal of the European Academy of Dermatology and Venereology : JEADV | Research letter or letter to the editor |
| Su et al, 2020              | Journal of the American Academy of Dermatology                         | Research letter or letter to the editor |
| Massone et al, 2021         | Anais brasileiros de dermatologia                                      | Research letter or letter to the editor |
| Li et al, 2021              | The Journal of infection                                               | Research letter or letter to the editor |
| Afanasiev et al, 2021       | Journal of the American Academy of Dermatology                         | Research letter or letter to the editor |
| Varma et al, 2011           | British Journal of Dermatology                                         | Research letter or letter to the editor |
| Van Der Heijden et al, 2010 | Journal of the European Academy of Dermatology and Venereology         | Research letter or letter to the editor |
| Motley et al, 2012          | BMJ (Online)                                                           | Research letter or letter to the editor |
| Villani et al, 2020         | Dermatologic therapy                                                   | Research letter or letter to the editor |
| Portnoy et al, 2018         | The journal of allergy and clinical immunology. In practice            | Research letter or letter to the editor |
| Tschandl et al, 2018        | British Journal of Dermatology                                         | Research letter or letter to the editor |
| Poolworarluk et al, 2020    | Future healthcare journal                                              | Research letter or letter to the editor |
| Anonymous et al, 2020       | Journal of drugs in dermatology : JDD                                  | Research letter or letter to the editor |
| Tan et al, 2021             | Annals of the Academy of Medicine, Singapore                           | Research letter or letter to the editor |
| Silva et al, 2021           | Anais brasileiros de dermatologia                                      | Research letter or letter to the editor |
| de Giorgi et al, 2016       | International Journal of Dermatology                                   | Wrong outcomes                          |
| Senel et al, 2014           | Journal of telemedicine and telecare                                   | Wrong outcomes                          |
| Goodier et al, 2021         | Contact dermatitis                                                     | Wrong outcomes                          |
| Foolad et al, 2017          | International Journal of Dermatology                                   | Wrong outcomes                          |
| Wells et al, 2020           | The Journal of clinical and aesthetic dermatology                      | Wrong outcomes                          |
| Arzberger et al, 2016       | Acta Dermato-Venereologica                                             | Wrong outcomes                          |
| Creighton-Smith et al, 2017 | International Journal of Dermatology                                   | Wrong outcomes                          |
| Marwaha et al, 2019         | Journal of the American Academy of Dermatology                         | Wrong outcomes                          |
| Pasquali et al, 2021        | Actas dermo-sifiliograficas                                            | Wrong outcomes                          |
| Vestergaard et al, 2020     | Family practice                                                        | Wrong outcomes                          |
| Kravets et al, 2018         | Acta dermatovenerologica Alpina, Pannonica, et Adriatica               | Wrong outcomes                          |
| Speiser et al, 2014         | American Journal of Dermatopathology                                   | Wrong outcomes                          |
| N/A                         | Journal of the American Academy of Dermatology                         | Wrong outcomes                          |
| Whited et al, 2013          | Journal of Telemedicine and Telecare                                   | Wrong outcomes                          |

|                                   |                                                                                                           |                                           |
|-----------------------------------|-----------------------------------------------------------------------------------------------------------|-------------------------------------------|
| Abhishek et al, 2021              | medRxiv                                                                                                   | Wrong outcomes                            |
| Villa et al, 2020                 | Internal and emergency medicine                                                                           | Wrong outcomes                            |
| Lubeek et al, 2016                | Tijdschrift voor gerontologie en geriatrie                                                                | review                                    |
| Ndegwa et al, 2016                | Health Technology Assessment Database                                                                     | review                                    |
| Moreno-Ramirez et al, 2017        | Acta dermato-venereologica                                                                                | review                                    |
| Moreno-Ramirez et al, 2017        | Acta Dermato-Venereologica                                                                                | review                                    |
| Van Der Heijden et al, 2010       | Huisarts en Wetenschap                                                                                    | review                                    |
| Walocko et al, 2017               | Dermatologic Clinics                                                                                      | review                                    |
| Roman et al, 2014                 | Journal of the Dermatology Nurses' Association                                                            | review                                    |
| Hart et al, 2011                  | Telemedicine journal and e-health : the official journal of the American Telemedicine Association         | review                                    |
| Elsner et al, 2020                | Journal der Deutschen Dermatologischen Gesellschaft = Journal of the German Society of Dermatology : JDDG | review                                    |
| Kaliyadan et al, 2020             | Indian journal of dermatology                                                                             | review                                    |
| Burch et al,                      |                                                                                                           | review                                    |
| Evans et al, 2017                 | Pharmazeutische Zeitung                                                                                   | Editorial                                 |
| Anonymous. et al, 2016            | Journal of AHIMA / American Health Information Management Association                                     | Editorial                                 |
| Luk et al, 2018                   | Hong Kong Journal of Dermatology and Venereology                                                          | Editorial                                 |
| Queen et al, 2018                 | International wound journal                                                                               | Editorial                                 |
| Anguita et al, 2014               | Nurse Prescribing                                                                                         | Editorial                                 |
| Haworth et al, 2020               | Clinical and experimental dermatology                                                                     | Editorial                                 |
| Romero-Aguilera et al, 2019       | Actas dermo-sifiliograficas                                                                               | Editorial                                 |
| Barrio Garde et al, 2016          | Piel                                                                                                      | Editorial                                 |
| Morand et al, 2010                | Annales de dermatologie et de venereologie                                                                | Editorial                                 |
| N/A                               | Journal of the American Academy of Dermatology                                                            | Abstract                                  |
| N/A                               | Journal of the American Academy of Dermatology                                                            | Abstract                                  |
| Bianchi et al, 2020               | Journal of the American Academy of Dermatology                                                            | Abstract                                  |
| Creadore et al, 2020              | Journal of the American Academy of Dermatology                                                            | Abstract                                  |
| N/A                               | Journal of the American Academy of Dermatology                                                            | Abstract                                  |
| Tognetti L et al, 2020            |                                                                                                           | Abstract                                  |
| SPLETE et al, 2014                | Emergency Medicine (00136654)                                                                             | Abstract                                  |
| N/A                               | Journal of the American Academy of Dermatology                                                            | Abstract                                  |
| Dahlen Gyllencreutz et al, 2017   | Journal of the European Academy of Dermatology and Venereology                                            | Wrong intervention                        |
| Tandjung et al, 2015              | Journal of Evaluation in Clinical Practice                                                                | Wrong intervention                        |
| Paradela-De-La-Morena et al, 2015 | European Journal of Dermatology                                                                           | Wrong intervention                        |
| Horsham et al, 2015               | British Journal of Dermatology                                                                            | Wrong intervention                        |
| Saenz et al, 2018                 | International Journal of Telemedicine and Applications                                                    | Wrong intervention                        |
| Kochmann et al, 2016              | Telemedicine journal and e-health : the official journal of the American Telemedicine Association         | Wrong comparator                          |
| Markun et al, 2017                | Medicine (United States)                                                                                  | Wrong comparator                          |
| Feigenbaum et al, 2017            | Pediatric Dermatology                                                                                     | Wrong comparator                          |
| Massone et al, 2014               | Journal of the European Academy of Dermatology and Venereology                                            | Wrong comparator                          |
| MacLellan et al, 2021             | Journal of the American Academy of Dermatology                                                            | Wrong comparator                          |
| Koysombat et al, 2021             | Journal of plastic, reconstructive & aesthetic surgery : JPRAS                                            | Correspondence                            |
| Jakhar et al, 2020                | Clinical and experimental dermatology                                                                     | Correspondence                            |
| Alkmim et al, 2013                | Journal of Telemedicine and Telecare                                                                      | Correspondence                            |
| NCT02836665, 2016                 | <a href="https://clinicaltrials.gov">ClinicalTrials.gov</a>                                               | Clinical trial - no associated manuscript |
| JPRN-UMIN000020873 et al, 2016    |                                                                                                           | Clinical trial - no associated manuscript |
| Fogel et al, 2016                 | Journal of the American Academy of Dermatology                                                            | Commentary                                |
| Hoyer et al, 2020                 | Cutis                                                                                                     | Commentary                                |
| Pasady et al, 2020                | Journal of the American Academy of Dermatology                                                            | Duplicate                                 |

|                            |                                                                                                   |                          |
|----------------------------|---------------------------------------------------------------------------------------------------|--------------------------|
| Moreno-Ramirez et al, 2017 | American Journal of Clinical Dermatology                                                          | Erratum                  |
| Trovato et al, 2011        | Eplasty                                                                                           | Wrong patient population |
| Bowns et al, 2016          | Health Technology Assessment Database                                                             | Wrong publication date   |
| Gemelas et al, 2019        | Telemedicine journal and e-health : the official journal of the American Telemedicine Association | Wrong setting            |

**eTable 5. List of studies excluded at the full-text screening stage.**



A

| Domain 1: SAMPLE SELECTION                                   |                                                                                                                                                                                                                                                                                                                                                                                                                                                                                                                                                                                                                                                                                                                                                                                                                                                              |                        |
|--------------------------------------------------------------|--------------------------------------------------------------------------------------------------------------------------------------------------------------------------------------------------------------------------------------------------------------------------------------------------------------------------------------------------------------------------------------------------------------------------------------------------------------------------------------------------------------------------------------------------------------------------------------------------------------------------------------------------------------------------------------------------------------------------------------------------------------------------------------------------------------------------------------------------------------|------------------------|
| Signalling Q1                                                | <p>Was a consecutive or random sample of patients enrolled?</p> <ul style="list-style-type: none"> <li>- In the study by Giavina-Bianchi et al., a consecutive sample of patients was enrolled, introducing less bias.</li> </ul> <p>Skewed patient demographics: e.g., over 70% female, select age groups, studies.</p> <p>that do not disclose age range and or sex/gender of the patients.</p> <ul style="list-style-type: none"> <li>- In the study by Carter et al., over 70% of the patients were female, which may introduce bias and reduce applicability.</li> </ul>                                                                                                                                                                                                                                                                                | Yes/No/Unclear         |
| Signalling Q2                                                | <p>Was a case-control design avoided?</p> <ul style="list-style-type: none"> <li>- Gabel et al. avoided a case-control design, which reduces the risk of bias.</li> </ul>                                                                                                                                                                                                                                                                                                                                                                                                                                                                                                                                                                                                                                                                                    | Yes/No/Unclear         |
| Signalling Q3                                                | <p>Did the study avoid inappropriate exclusions?</p> <ul style="list-style-type: none"> <li>- In the study by Giavina-Bianchi et al., complex, and severe cases were excluded, which may introduce bias and affect applicability.</li> </ul>                                                                                                                                                                                                                                                                                                                                                                                                                                                                                                                                                                                                                 | Yes/No/Unclear         |
| Risk of bias                                                 | <p><b>Could the selection of patients have introduced bias?</b></p> <ul style="list-style-type: none"> <li>- For example, Giavina-Bianchi removed the most complex/severe cases and then excluded any non-skin neoplasms, and then they further filtered to only include the 10 most common skin neoplasms.</li> </ul>                                                                                                                                                                                                                                                                                                                                                                                                                                                                                                                                       | RISK: LOW/HIGH/UNCLEAR |
| Concerns regarding applicability                             | <p><b>Is there concern that the included patients do not match the review question?</b></p> <ul style="list-style-type: none"> <li>- 'High' if the study only looked at a specific lesion category such as skin cancers only, or pigmented lesions only, or if they had a skewed patient demographics (e.g., 70% female, or geriatric population only). Our study is focuses on generalizability of teledermatology in all skin conditions.</li> </ul>                                                                                                                                                                                                                                                                                                                                                                                                       | RISK: LOW/HIGH/UNCLEAR |
| Domain 2: INDEX TEST (Teledermatology consult)               |                                                                                                                                                                                                                                                                                                                                                                                                                                                                                                                                                                                                                                                                                                                                                                                                                                                              |                        |
| Signalling Q1                                                | <p>Were the derms/physicians making the index diagnoses unaware of the reference diagnosis?</p> <ul style="list-style-type: none"> <li>- Same dermatologist doing F2F and teledermatology consults? Is there blinding of dermatologists to each other's diagnoses? In the study by Tan et al., the same dermatologist performed both the F2F and teledermatology consultations, which may introduce bias if they were not blinded to each other's diagnoses.</li> </ul>                                                                                                                                                                                                                                                                                                                                                                                      | Yes/No/Unclear         |
| Signalling Q2                                                | <p>Did the study require physicians to provide a specific primary diagnosis, or were they only required to provide a general grouping, e.g., inflammatory vs. skin neoplasm. Was analysis only performed for categories instead of complete primary diagnoses (such as skin neoplasm vs basal cell carcinoma)?</p> <p>Did physicians use standardized referral/consult sheet with set diagnoses? Did they group similar / synonymous diagnoses (e.g dermatitis / eczema together)?</p> <p>Was a non-specialist in charge of comparing diagnoses and deciding if there was agreement?</p> <ul style="list-style-type: none"> <li>- In the study by Warshaw et al., physicians were required to provide a categorical or pooled diagnosis (e.g., skin neoplasm instead of basal cell carcinoma), which may introduce bias and reduce applicability.</li> </ul> | Yes/No/Unclear         |
| Risk of bias                                                 | <p><b>Could the conduct (technology used for taking images/viewing images) or interpretation (what constituted primary diagnosis/ complete agreement) of the index test have introduced bias?</b></p>                                                                                                                                                                                                                                                                                                                                                                                                                                                                                                                                                                                                                                                        | RISK: LOW/HIGH/UNCLEAR |
| Concerns regarding applicability                             | <p>Is there concern that the index test, its conduct, or interpretation differ from the review question?</p>                                                                                                                                                                                                                                                                                                                                                                                                                                                                                                                                                                                                                                                                                                                                                 | RISK: LOW/HIGH/UNCLEAR |
| Domain 3: REFERENCE TEST (F2F, in some cases histopathology) |                                                                                                                                                                                                                                                                                                                                                                                                                                                                                                                                                                                                                                                                                                                                                                                                                                                              |                        |
| Signalling Q1                                                | <p>Describe the reference standard and how it was conducted and interpreted:</p>                                                                                                                                                                                                                                                                                                                                                                                                                                                                                                                                                                                                                                                                                                                                                                             | Yes/No/Unclear         |

|                                         |                                                                                                                                                                                                                                                                                                                                                                                                               |                           |
|-----------------------------------------|---------------------------------------------------------------------------------------------------------------------------------------------------------------------------------------------------------------------------------------------------------------------------------------------------------------------------------------------------------------------------------------------------------------|---------------------------|
|                                         | What was the order of visits?<br>What was the experience level and specialization of the F2F physician?<br>Did the same dermatologist do both teledermatology and F2F consult?                                                                                                                                                                                                                                |                           |
| Signalling Q2                           | Is the reference standard likely to correctly classify the target condition?                                                                                                                                                                                                                                                                                                                                  | Yes/No/Unclear            |
| <b>Risk of bias</b>                     | <b>Could the reference standard, its conduct, or its interpretation have introduced bias?</b><br>- In studies where the reference standard was a consultation with a non-specialist, such as Costello et al., there is a risk of introducing bias.                                                                                                                                                            | RISK: LOW/HIGH/UNCLEAR    |
| <b>Concerns regarding applicability</b> | <b>Could the reference standard, its conduct, or its interpretation have introduced bias?</b><br>- Applicability was impacted by physician specialization.                                                                                                                                                                                                                                                    | RISK: LOW/HIGH/UNCLEAR    |
| <b>Domain 4: FLOW AND TIMING</b>        |                                                                                                                                                                                                                                                                                                                                                                                                               |                           |
| Signalling Q1                           | Was there an appropriate interval between index test(s) and reference standard?<br>- Was the time interval greater than 2 weeks? In studies where the same dermatologist did F2F and teledermatology -> Say 'No' regardless of the time between teledermatology and F2F consult.<br>- In the study by Gerhardt et al., there was a 30-day interval between teledermatology and F2F, which may introduce bias. | Yes/No/Unclear            |
| Signalling Q2                           | Did all patients receive a reference standard?                                                                                                                                                                                                                                                                                                                                                                |                           |
| Signalling Q3                           | Did all patients receive the same reference standard?<br>- In studies like Sola-Ortigosa et al., all patients received a reference standard, either histopathology or F2F consultation.<br>Did a paper use histopathology as the reference standard for cancer lesions but F2F for non-cancer lesions? Were all patients evaluated by physicians with similar level of experience?                            | Yes/No/Unclear            |
| Signalling Q4                           | Were all patients included in the analysis?<br>- In studies like Gabel et al., all patients were included in the analysis, reducing the risk of bias.                                                                                                                                                                                                                                                         | Yes/No/Unclear            |
| <b>Risk of bias</b>                     | Could the patient flow have introduced bias?                                                                                                                                                                                                                                                                                                                                                                  | RISK:<br>LOW/HIGH/UNCLEAR |

B

| Study                            | Risk of bias domains |    |    |    | Overall |
|----------------------------------|----------------------|----|----|----|---------|
|                                  | D1                   | D2 | D3 | D4 |         |
| Altieri, et al, 2017             | +                    | +  | +  | +  | +       |
| Azfar, et al, 2014               | +                    | +  | +  | +  | ×       |
| Barbieri, et al, 2014            | +                    | +  | -  | +  | -       |
| Barcaui, et al, 2018             | +                    | +  | ×  | ×  | ×       |
| Batalla, et al, 2015             | -                    | +  | +  | +  | -       |
| Borve, et al, 2012               | +                    | +  | ×  | ×  | ×       |
| Borve, et al, 2013               | ×                    | -  | +  | +  | ×       |
| Carter, et al, 2017              | ×                    | -  | +  | ×  | ×       |
| Chen, et al, 2010                | +                    | ×  | ×  | -  | ×       |
| Clarke, et al, 2021              | ×                    | ×  | +  | +  | ×       |
| Costello, et al, 2019            | ×                    | +  | ×  | ×  | ×       |
| Duong, et al, 2014               | +                    | -  | ×  | ×  | ×       |
| Gabel, et al, 2021               | ×                    | +  | +  | ×  | ×       |
| Gatica, 2015                     | +                    | +  | -  | +  | -       |
| Gerhardt, et al, 2021            | ×                    | -  | ×  | ×  | ×       |
| Giavina-Bianchi, et al, Oct 2020 | ×                    | +  | -  | ×  | ×       |
| Giavina-Bianchi, et al, Nov 2020 | ×                    | +  | -  | ×  | ×       |
| Gonzalez-Coloma, et al, 2019     | +                    | ×  | ×  | +  | ×       |
| Goulart-Silveira, et al, 2019    | ×                    | +  | +  | ×  | ×       |
| Jones, et al, 2021               | +                    | -  | +  | +  | -       |
| Keller, et al, 2020              | +                    | +  | +  | +  | +       |
| Lamel, et al, 2012               | -                    | -  | +  | +  | -       |
| Marchell, et al, 2017            | +                    | +  | +  | +  | +       |
| Muir, et al, 2011                | ×                    | +  | +  | ×  | ×       |
| Nami, et al, 2015                | ×                    | +  | +  | +  | ×       |
| Okita, et al, 2016               | +                    | +  | +  | +  | ×       |
| Patro, et al, 2015               | +                    | +  | ×  | +  | ×       |
| Piccoli, et al, 2015             | ×                    | +  | ×  | ×  | ×       |
| Ribas, et al, 2010               | ×                    | +  | ×  | ×  | ×       |
| Rubegni, et al, 2011             | +                    | +  | +  | +  | +       |
| Saleh, et al, 2017               | +                    | +  | +  | +  | +       |
| Senel, et al, 2013               | ×                    | +  | +  | ×  | ×       |
| Sola-Ortigosa, et al, 2020       | +                    | +  | ×  | ×  | ×       |
| Tan, et al, 2010                 | ×                    | ×  | +  | ×  | ×       |
| Tran, et al, 2011                | +                    | +  | ×  | +  | ×       |
| Vano-Galvan, et al, 2010         | +                    | +  | +  | +  | ×       |
| Vestergaard, et al, 2020         | +                    | +  | +  | ×  | ×       |
| Warshaw, et al, 2015             | +                    | -  | +  | +  | -       |
| Zanini, 2013                     | -                    | +  | +  | -  | -       |
| Zink, et al, 2017, July          | +                    | -  | ×  | ×  | ×       |
| Zink, et al, 2017, Sept          | +                    | +  | +  | +  | +       |

Domains:  
D1: Patient selection.  
D2: Index test.  
D3: Reference standard.  
D4: Flow & timing.

Judgement  
 High  
 Some concerns  
 Low

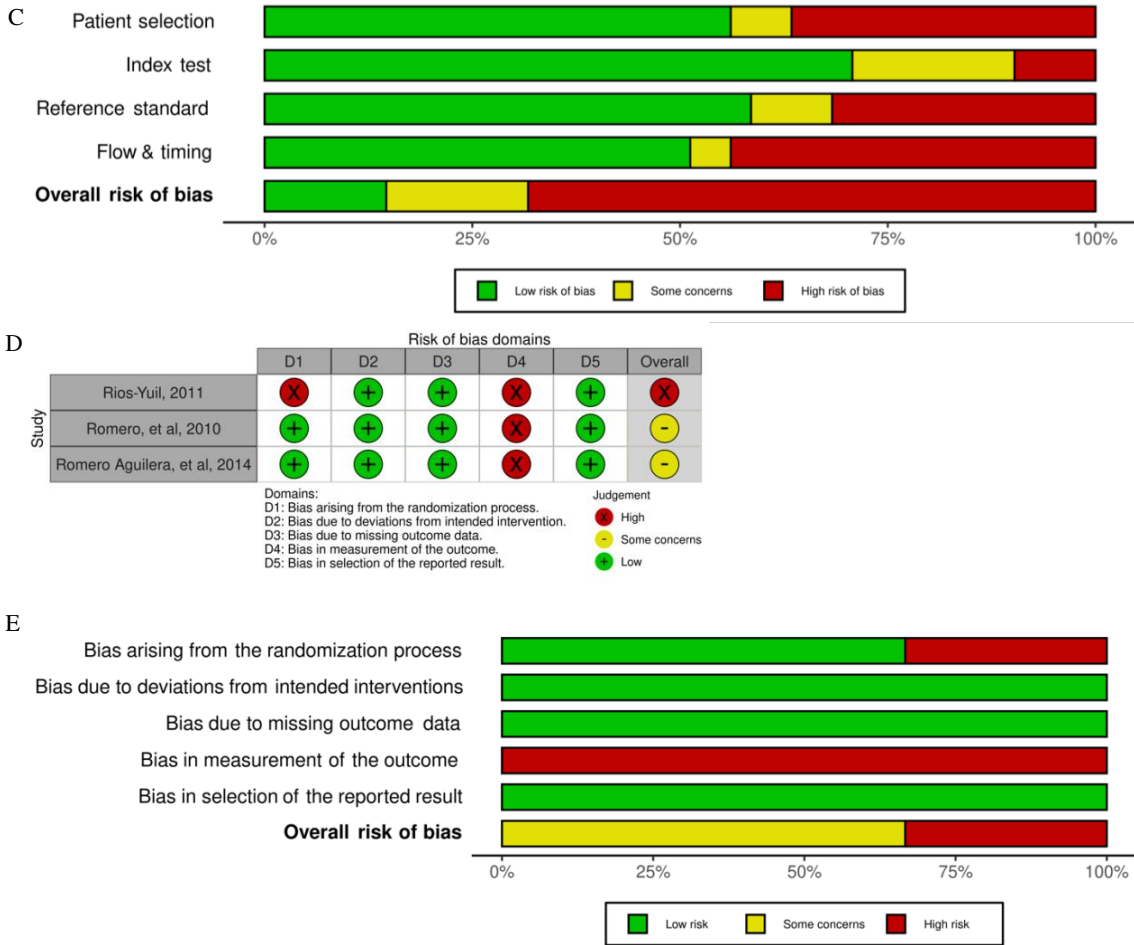

**eTable 6. Risk of Bias (ROB) results.**

(A) QUADAS-2 summary sheet. (B,C) QUADAS-2 RoB analysis of 41 observational studies. (D,E) ROB-2 analysis of three randomized controlled trials.

**eReferences.**

1. Hoyer P, Ahatov R, Ross L. Utilization of telehealth services during the COVID-19 pandemic. *Cutis*. 2020;106(2):70-1.
2. Gomez Arias PJ, Arias Blanco MC, Redondo Sanchez J, et al. [Usefulness and efficiency of teledermoscopy in skin cancer management in primary care]. *Semergen*. 2020;46(8):553-9.
3. Jacoby T, Woolard A, Chamoun S, et al. Asynchronous Teledermatology Assessment of Young Adult Acne Likely Concordant With In-Person Evaluation. *Journal of drugs in dermatology : JDD*. 2021;20(4):432-5.
4. McHugh ML. Interrater reliability: the kappa statistic. *Biochem Med (Zagreb)*. 2012;22(3):276-82.
5. Altieri L, Hu J, Nguyen A, et al. Interobserver reliability of teledermatology across all Fitzpatrick skin types. *Journal of telemedicine and telecare*. 2017;23(1):68-73.
6. Castelo-Soccio L, Kovarik CL, Azfar RS, et al. Reliability and validity of mobile teledermatology in human immunodeficiency virus-positive patients in botswana a pilot study. *JAMA Dermatology*. 2014;150(6):601-7.
7. Barbieri JS, Nelson CA, James WD, et al. The reliability of teledermatology to triage inpatient dermatology consultations. *JAMA Dermatology*. 2014;150(4):419-24.
8. Barcaui CB, Lima PMO. Application of teledermoscopy in the diagnosis of pigmented lesions. *International Journal of Telemedicine and Applications*. 2018;2018((Barcaui) Adjunct Professor of Dermatology, Faculty of Medical Sciences, State University of Rio de Janeiro, PhD in Medicine (Dermatology), University of Sao Paulo, Dermatology Department, Pedro Ernesto University Hospital, Rio de Janeiro State University):1624073.
9. Batalla A, Suh-Oh HJ, Abalde T, et al. Teledermatology in Paediatrics. Observations in daily clinical practice. *Anales de pediatria (Barcelona, Spain : 2003)*. 2016;84(6):324-30.
10. Borve A, Holst A, Gente-Lidholm A, et al. Use of the mobile phone multimedia messaging service for teledermatology. *Journal of Telemedicine and Telecare*. 2012;18(5):292-6.
11. Borve A, Terstappen K, Sandberg C, et al. Mobile teledermoscopy-there's an app for that! *Dermatology practical & conceptual*. 2013;3(2):41-8.
12. Carter ZA, Li X, Goldman S, et al. Creation of an internal teledermatology store-and-forward system in an existing electronic health record: A pilot study in a safety-net public health and hospital system. *JAMA Dermatology*. 2017;153(7):644-50.
13. Chen TS, Goldyne ME, Mathes EFD, et al. Pediatric teledermatology: Observations based on 429 consults. *Journal of the American Academy of Dermatology*. 2010;62(1):61-6.
14. Clarke EL, Reichenberg JS, Ahmed AM, et al. The utility of teledermatology in the evaluation of skin lesions. *Journal of telemedicine and telecare*. 2021(9506702, cpj):1357633X20987423.
15. Costello CM, Cumsy HJL, Maly CJ, et al. Improving Access to Care Through the Establishment of a Local, Teledermatology Network. *Telemedicine journal and e-health : the official journal of the American Telemedicine Association*. 2020;26(7):935-40.
16. Duong TA, Cordoliani F, Julliard C, et al. Emergency department diagnosis and management of skin diseases with real-time teledermatologic expertise. *JAMA Dermatology*. 2014;150(7):743-7.
17. Gabel CK, Nguyen E, Karmouta R, et al. Use of teledermatology by dermatology hospitalists is effective in the diagnosis and management of inpatient disease. *Journal of the American Academy of Dermatology*. 2021;84(6):1547-53.
18. Gatica JL, Bertolo S, Morales E, et al. Store-and-forward teledermatology in Chile: A contribution to primary health care. *Piel*. 2015;30(3):148-54.
19. Gerhardt CA, Foels R, Grewe S, et al. Assessing the Diagnostic Accuracy of Teledermatology Consultations at a Local Veterans Affairs Dermatology Clinic. *Cureus*. 2021;13(6):e15406.
20. Giavina-Bianchi M, Azevedo MFD, Sousa RM, et al. Part II: Accuracy of Teledermatology in Skin Neoplasms. *Frontiers in medicine*. 2020;7(101648047):598903.
21. Giavina-Bianchi M, Sousa R, Cordioli E. Part I: Accuracy of Teledermatology in Inflammatory Dermatoses. *Frontiers in medicine*. 2020;7(101648047):585792.
22. Keller JJ, Johnson JP, Latour E. Inpatient teledermatology: Diagnostic and therapeutic concordance among a hospitalist, dermatologist, and teledermatologist using store-and-forward teledermatology. *Journal of the American Academy of Dermatology*. 2020;82(5):1262-7.
23. Lamel SA, Haldeman KM, Ely H, et al. Application of mobile teledermatology for skin cancer screening. *Journal of the American Academy of Dermatology*. 2012;67(4):576-81.
24. Muir J, Xu C, Singh P, et al. Incorporating teledermatology into emergency medicine. *EMA - Emergency Medicine Australasia*. 2011;23(5):562-8.

25. Nami N, Rubegni P, Fimiani M, et al. Concordance and Time Estimation of Store-and-Forward Mobile Teledermatology Compared to Classical Face-to-Face Consultation. *Acta Dermato-Venereologica*. 2015;95(1):35-9.
26. Okita AL, Molina Tinoco LJ, Criado PR, et al. Use of Smartphones in Telemedicine: Comparative Study Between Standard and Teledermatological Evaluation of High-Complex Care Hospital Inpatients. *Telemedicine journal and e-health : the official journal of the American Telemedicine Association*. 2016;22(9):755-60.
27. Patro BK, Tripathy JP, De D, et al. Diagnostic agreement between a primary care physician and a teledermatologist for common dermatological conditions in North India. *Indian dermatology online journal*. 2015;6(1):21-6.
28. Ribas J, Schettini APM, Ribas CBDR, et al. Agreement between dermatological diagnoses made by live examination compared to analysis of digital images. *Anais Brasileiros de Dermatologia*. 2010;85(4):441-7.
29. Rios-Yuil JM. [Correlation between face-to-face assessment and telemedicine for the diagnosis of skin disease in case conferences]. *Actas dermo-sifiliograficas*. 2012;103(2):138-43.
30. Romero Aguilera G, Cortina De La Calle P, Vera Iglesias E, et al. Interobserver reliability of store-and-forward teledermatology in a clinical practice setting. *Actas Dermo-Sifiliograficas*. 2014;105(6):605-13.
31. Romero G, Sanchez P, Garcia M, et al. Randomized controlled trial comparing store-and-forward teledermatology alone and in combination with web-camera videoconferencing. *Clinical and Experimental Dermatology*. 2010;35(3):311-7.
32. Rubegni P, Nami N, Poggiali S, et al. Geriatric teledermatology: Store-and-forward vs. face-to-face examination. *Journal of the European Academy of Dermatology and Venereology*. 2011;25(11):1334-9.
33. Saleh N, Abdel Hay R, Hegazy R, et al. Can teledermatology be a useful diagnostic tool in dermatology practice in remote areas? An Egyptian experience with 600 patients. *Journal of telemedicine and telecare*. 2017;23(2):233-8.
34. Sola-Ortigosa J, Munoz-Santos C, Masat-Tico T, et al. The Role of Teledermatology and Teledermoscopy in the Diagnosis of Actinic Keratosis and Field Cancerization. *The Journal of investigative dermatology*. 2020;140(10):1976-84.e4.
35. Tan E, Yung A, Oakley A, et al. Successful triage of patients referred to a skin lesion clinic using teledermoscopy (IMAGE IT trial). *British Journal of Dermatology*. 2010;162(4):803-11.
36. Tran K, Ayad M, Monir S, et al. Mobile teledermatology in the developing world: Implications of a feasibility study on 30 Egyptian patients with common skin diseases. *Journal of the American Academy of Dermatology*. 2011;64(2):302-9.
37. Vano-Galvan S, Aguayo-Leiva I, Rios-Buceta L, et al. Store-and-forward teledermatology: Assessment of validity in a series of 2000 observations. *Actas Dermo-Sifiliograficas*. 2011;102(4):277-83.
38. Vestergaard T, Prasad SC, Schuster A, et al. Diagnostic accuracy and interobserver concordance: teledermoscopy of 600 suspicious skin lesions in Southern Denmark. *Journal of the European Academy of Dermatology and Venereology : JEADV*. 2020;34(7):1601-8.
39. Gravely AA, Warshaw EM, Nelson DB. Reliability of store and forward teledermatology for skin neoplasms. *Journal of the American Academy of Dermatology*. 2015;72(3):426-35.
40. Zanini M. Analyze of diagnostic concordance between face-to-face and teledermatology diagnosis. *Medicina Cutanea Ibero-Latino-Americana*. 2013;41(2):60-2.
41. Zink A, Kolbinger A, Leibl M, et al. The value of teledermatology using a mobile app compared to conventional dermatology. *European Journal of Dermatology*. 2017;27(4):429-31.
42. Zink A, Kolbinger A, Leibl M, et al. Teledermoscopy by mobile phones: Reliable help in the diagnosis of skin lesions? *Hautarzt*. 2017;68(11):890-5.
43. Marchell R, Locatis C, Liu W-L, et al. Comparing High Definition Live Interactive and Store-and-Forward Consultations to In-Person Examinations. *Telemedicine journal and e-health : the official journal of the American Telemedicine Association*. 2017;23(3):213-8.
44. Jones L, Jameson M, Oakley A. Remote Skin Cancer Diagnosis: Adding Images to Electronic Referrals Is More Efficient Than Wait-Listing for a Nurse-Led Imaging Clinic. *Cancers (Basel)*. 2021;13(22).
45. Gonzalez Coloma F, Sandoval Garces M, Gedda Quiroga V, et al. Teledermatology in Remote Parts of Chile: Experience in 4 Isolated Rural Areas. *Actas dermo-sifiliograficas*. 2019;110(8):653-8.
46. Goulart Silveira CE, Carcano C, Mauad EC, et al. Call phone usefulness to improve the skin cancer screening: preliminary results and critical analysis of mobile app development. *Rural & Remote Health*. 2019;19(1):1-7.
47. Piccoli MF, Amorim BDB, Wagner HM, et al. Teledermatology protocol for screening of Skin cancer. *Anais Brasileiros de Dermatologia*. 2015;90(2):202-10.

48. Senel E, Baba M, Durdu M. The contribution of teledermatology to the diagnosis and management of non-melanocytic skin tumours. *Journal of Telemedicine and Telecare*. 2013;19(1):60-3.
49. Gravely AA, Nelson DB, Warsaw EM. Accuracy of teledermatology/teledermoscopy and clinic-based dermatology for specific categories of skin neoplasms. *Journal of the American Academy of Dermatology*. 2010;63(2):348-52.
